# Supplementary material for: Identification of potential biomarkers of vascular calcification using bioinformatics analysis and validation in vivo
Source: PeerJ. 2022 Mar 16;10:e13138. doi: 10.7717/peerj.13138 (PMC8934046; doi:10.7717/peerj.13138)
Supplement: Supplemental Information 1 [file peerj-10-13138-s001.xlsx]

## Sheet: Sheet1
			Cт Mean
β-Actin	NC 1		18.046
	NC 2		18.046
	NC 3		18.046
	VC 1		25.8021
	VC 2		25.8021
	VC 3		25.8021
Gene1		CT		ΔCT	ΔCT(NC-average)	ΔΔCT	2-⊿⊿ct
IBSP	NC 1	35.2332		17.1872	16.706	0.481253	0.716355
	NC 2	34.6645		16.6185		-0.0874914	1.06252
	NC 3	34.3582		16.3122		-0.393762	1.31381
	VC 1	35.039		9.23688		-7.46909	177.182
	VC 2	36.5459		10.7438		-5.96218	62.344
	VC 3	34.4575		8.65537		-8.0506	265.139
Gene2		CT		ΔCT	ΔCT(NC-average)	ΔΔCT	2-⊿⊿ct
SOST	NC 1	29.5164		11.4704	11.1643	0.30613	0.808808
	NC 2	29.1417		11.0957		-0.0685705	1.04868
	NC 3	28.9728		10.9267		-0.23756	1.179
	VC 1	28.6674		2.8653		-8.29898	314.951
	VC 2	30.2929		4.49082		-6.67347	102.074
	VC 3	30.3864		4.58433		-6.57996	95.6679
Gene3		CT		ΔCT	ΔCT(NC-average)	ΔΔCT	2-⊿⊿ct
FN1	NC 1	22.4699		4.42384	4.28528	0.138559	0.908426
	NC 2	22.1559		4.10991		-0.17537	1.12925
	NC 3	22.3681		4.32209		0.0368112	0.974807
	VC 1	23.2784		-2.52369		-6.80896	112.125
	VC 2	23.1472		-2.65489		-6.94017	122.8
	VC 3	23.3587		-2.44344		-6.72871	106.058
Gene4		CT		ΔCT	ΔCT(NC-average)	ΔΔCT	2-⊿⊿ct
COL1A1	NC 1	26.456		8.40994	8.49074	-0.080801	1.05761
	NC 2	26.4476		8.40154		-0.0891991	1.06378
	NC 3	26.7068		8.66074		0.17	0.888843
	VC 1	34.9768		9.17468		0.683943	0.622462
	VC 2	35.3981		9.59598		1.10523	0.464827
	VC 3	34.4214		8.6193		0.128557	0.914746
Gene5		CT		ΔCT	ΔCT(NC-average)	ΔΔCT	2-⊿⊿ct
SPP1	NC 1	32.8518		14.8057	15.1202	-0.314487	1.24357
	NC 2	33.3351		15.2891		0.168873	0.889537
	NC 3	33.3119		15.2658		0.145615	0.903994
	VC 1	33.4074		7.60524		-7.51498	182.909
	VC 2	33.7892		7.9871		-7.13313	140.373
	VC 3	33.9391		8.13701		-6.98321	126.519
