# Supplementary material for: Identification of potential biomarkers of vascular calcification using bioinformatics analysis and validation in vivo
Source: PeerJ. 2022 Mar 16;10:e13138. doi: 10.7717/peerj.13138 (PMC8934046; doi:10.7717/peerj.13138)
Supplement: Supplemental Information 2 [file peerj-10-13138-s002.xlsx]

## Sheet: Sheet1
gene	NAME	locus	Control	Uremic	Control.VitD	log2.Uremic_Control	log2.Control.VitD_Control	log2.Uremic_control.Vit D	q_Control_vs_Uremic	q_Ctrl_vs_control.Vit D	q_Control.Vit D_vs_Uremic	aorta_41	aorta_42	aorta_43	aorta_44	aorta_46	aorta_9	aorta_17	aorta_20	aorta_27	aorta_28	aorta_36	aorta_37	aorta_38	aorta_39
Mgp	matrix Gla protein	chr4:235113782-235117105	11134.8	78679.5	12730.5	2.82092	0.193213	2.6277	0.00173202	0.797653	0.00563845	12347.8	8578.61	9326.3	12027.4	13393.7	85441.6	76486.7	74900.4	58041.4	98527.4	11193.2	17228.7	11628.5	10871.4
Bgn	biglycan	chr1:153067989-153080152	9949.67	9629.84	9295.78	-0.0471366	-0.0980722	0.0509356	0.964922	0.926562	0.96447	14423.1	10890	11672.4	7558.08	5204.78	14502.8	9826.24	9470.35	4735	9614.81	12634.6	8844.66	5337.9	10365.9
Spp1	secreted phosphoprotein 1	chr14:6653085-6658937	443.186	6552.38	1364.77	3.88604	1.62268	2.26336	0.000653095	0.000653095	0.000653095	611.705	383.27	403.426	458.405	359.123	8383.61	7080.61	5497.73	3918.93	7881.01	761.499	3281.15	627.034	789.406
Sparc	secreted protein, acidic, cysteine-rich (osteonectin)	chr10:40573509-40595261	8769.54	6484.28	5368.29	-0.435555	-0.708038	0.272483	0.641524	0.363402	0.779425	8993.99	7137.97	8034.39	9660.7	10020.6	8249.97	4230.99	9756.2	4019.06	6165.17	5575.08	4675.84	5057.58	6164.66
Tagln	transgelin	chr8:48847363-48852838	11179.5	6368.71	9739.01	-0.811789	-0.199014	-0.612774	0.155543	0.83588	0.344276	13179.1	9177.73	10492.4	12804.9	10243.7	7696.21	8117.31	6202.28	3829.06	5998.69	9129.69	6611.92	10717.8	12496.7
Tpm2	tropomyosin 2, beta	chr5:63541214-63550146	5341.85	4536.47	4193.89	-0.235768	-0.349051	0.113282	0.720984	0.545828	0.884217	6029.47	4201.66	4283.95	6842.76	5351.4	5388.31	7223.47	3654.34	3077.83	3338.41	4438.74	3572.22	3853.09	4911.5
Acta2	actin, alpha 2, smooth muscle, aorta	chr1:259760520-259773301	7118.4	4256.65	6797.05	-0.741834	-0.0666434	-0.67519	0.174284	0.947973	0.255841	9164.26	5996.16	6748.31	7802.18	5881.09	4304.33	6675.39	4114.13	2579.89	3609.53	6297.36	5039.98	7557.85	8293.02
Ptms	parathymosin	chr4:224453138-224457327	6637.12	3960.83	5280.85	-0.744755	-0.329787	-0.414967	0.10142	0.630177	0.465472	6921.59	6252.42	5994.93	7659.13	6357.52	4933.23	4232.85	3984.49	3116.41	3537.16	6026.97	4673.24	3954.72	6468.47
Fn1	fibronectin 1	chr9:78674438-78743407	191.983	3777.95	499.536	4.29856	1.37961	2.91895	0.000653095	0.00173202	0.000653095	211.602	176.137	208.591	206.298	157.285	3596.12	5005.81	3020.87	2944.31	4322.66	383.694	936.165	297.779	380.504
Igfbp7	insulin-like growth factor binding protein 7	chr14:32803850-32901277	2836.97	3128.23	2656.67	0.140993	-0.0947349	0.235727	0.816396	0.890215	0.687308	3317.78	2796.74	3145.97	2649.86	2274.51	3717.38	3371.54	3405.9	1822.8	3323.51	2735.25	2337.83	2572.85	2980.73
Tmsb4x	thymosin, beta 4, X chromosome	chrX:28985079-28987070	2102.3	3051.18	2297.7	0.537399	0.128223	0.409176	0.0918375	0.793448	0.286292	2216	1892.05	2107.1	2214.2	2082.12	3929.86	3317.97	3087.5	2081.95	2838.59	2516.89	2484.74	2057.03	2132.13
Hba1	hemoglobin, alpha 1	chr10:15497888-15498744	1204.75	2786.25	507.534	1.20959	-1.24716	2.45675	0.0242889	0.0215516	0.000653095	603.647	86.7343	4510.86	122.123	700.403	7263.8	1062.55	1499.97	3525.65	579.265	796.812	179.971	564.175	489.18
Vim	vimentin	chr17:82500897-82509383	1785.75	2710.66	1985.21	0.602113	0.152759	0.449354	0.157815	0.801132	0.375829	1897.13	1674.52	1804.76	1922.72	1629.63	2832.59	3855.43	2365.81	2016.48	2483	2201.47	1895.64	1890.68	1953.05
Eln	elastin	chr12:26978747-27022485	7388.73	2704.05	4692.81	-1.45021	-0.654874	-0.795333	0.0277786	0.399524	0.369953	6497.98	6244.05	6616.82	7987.12	9597.69	3641.28	917.762	5262.78	1286.95	2411.45	4808.23	3609.54	3402.38	6951.09
Cst3	cystatin C	chr3:149628695-149632565	1175.33	2680.75	1472.64	1.18957	0.325348	0.864226	0.000653095	0.350255	0.00822323	1213.53	1223.64	1181.58	1233.33	1024.54	2430.27	3867.96	2506.18	1951.99	2647.33	1595	1397.44	1401.9	1496.23
Ctgf	connective tissue growth factor	chr1:23331544-23334660	1561.84	2599.24	1622.25	0.734847	0.0547482	0.680099	0.097922	0.940871	0.168345	1336.53	1743.15	1995.09	1335.19	1399.23	2593.1	3711.15	2022.63	1710.84	2958.49	1320.58	1581.26	2009.48	1577.67
Csrp1	cysteine and glycine-rich protein 1	chr13:57601913-57623354	3343.04	2598.43	2975.09	-0.363521	-0.168227	-0.195294	0.508019	0.814831	0.775955	3733.83	3087.64	3066.32	3905.47	2921.97	3229.54	3691.52	2134.68	1680.22	2256.21	3162.47	2196.62	2915.26	3626.03
Sod3	superoxide dismutase 3, extracellular	chr14:61071311-61077045	2875.49	2428.81	2579.88	-0.243557	-0.156507	-0.0870507	0.685067	0.818519	0.912321	3171.26	2963.37	3389.94	2631.44	2221.44	3462.07	2004.29	2211.97	1588.3	2877.45	3424.41	2150.51	2024.8	2719.79
Hba2	hemoglobin, alpha 2	chr10:15484458-15485302	736.753	2161.65	350.853	1.55288	-1.07031	2.62319	0.000653095	0.0275174	0.000653095	372.817	61.0171	2697.76	72.9448	479.224	5713.54	757.441	1072.3	2774.79	490.171	534.184	116.731	406.812	345.686
Myl9	myosin, light chain 9, regulatory	chr3:158832629-158836243	2954.2	2124.16	2476.74	-0.475874	-0.254325	-0.221549	0.217826	0.623782	0.6676	3108.83	2446.85	2860.76	3699.85	2654.7	2612.14	2444	2141.67	1163.82	2259.17	2478.55	1961.86	2574.76	2891.78
Fabp4	fatty acid binding protein 4, adipocyte	chr2:113547702-113552304	2297.66	2075.25	4448.47	-0.14688	0.953142	-1.10002	0.791142	0.00525255	0.00121133	1804.35	1786.15	1930.72	1882.47	4084.63	1525.57	845.295	1948.03	4716.38	1340.99	4611.21	5388.21	5806.53	1987.93
Gpx3	glutathione peroxidase 3	chr10:40019703-40027691	481.545	2020.67	418.221	2.06909	-0.203407	2.2725	0.000653095	0.591506	0.000653095	585.505	415.044	566.313	424.437	416.428	2053.95	3001.97	1748.31	1908.86	1390.27	506.292	427.15	363.443	375.998
Serpine1	serpin peptidase inhibitor, clade E (nexin, plasminogen activator inhibitor type 1), member 1	chr12:24653384-24663763	2014.29	1976.06	1624.88	-0.027644	-0.309942	0.282298	0.977593	0.695545	0.72462	1817.54	2960.2	3250.51	1410.11	633.1	2814.48	1982.22	1060.41	1164.87	2858.34	1509.51	2223.34	2340.51	426.146
Myh11	myosin, heavy chain 11, smooth muscle	chr10:11444266-11538406	3544.59	1724.19	2642.77	-1.0397	-0.423568	-0.616136	0.0871279	0.671614	0.470112	3637.35	2978.38	3228.72	4438.57	3439.93	1740.05	2445.5	1445.78	1341.64	1647.96	2781.17	1637.86	2877.82	3274.23
S100a6	S100 calcium binding protein A6	chr2:209441378-209442604	1214.6	1693.08	1289.81	0.479174	0.0866852	0.392489	0.0748091	0.842817	0.2012	1283.15	1272.05	1177.11	1297.51	1043.16	2217.03	2002.71	1351.08	1310.88	1583.7	1569.03	1349.88	1040.81	1199.52
S100a11	S100 calcium binding protein A11	chr2:210999098-211000650	2313.96	1669.95	1953.12	-0.470558	-0.244586	-0.225972	0.0806515	0.511332	0.550328	2700.06	2203.61	2460.98	2716.72	1488.45	2264.52	1986.43	1547.05	992.3	1559.47	1937.91	2985.26	1188.4	1700.91
Calr	calreticulin	chr19:36932393-36937289	1618.48	1663.47	1712.21	0.0395589	0.0812194	-0.0416605	0.953481	0.905004	0.955328	1391.57	1307.82	1520.29	1782.32	2090.38	2054.74	1155.64	1986.88	1396.75	1723.34	1903.81	1583.03	1366.34	1995.64
Nov	nephroblastoma overexpressed	chr7:95015158-95022179	1472.26	1631.68	1635.86	0.148328	0.152016	-0.00368783	0.77866	0.787407	0.995809	1657.25	1201.86	1493.66	1773.97	1234.56	1528.36	2313.6	1466.64	1229.82	1620	1409.67	1070.9	1868.37	2194.51
Actb	actin, beta	chr12:15745855-15748826	1703.71	1583.93	1743.98	-0.105173	0.0337072	-0.13888	0.844228	0.959866	0.798753	2114.85	1681.67	1673.25	1650.97	1397.81	1769.28	1632.5	1649.75	1167.73	1700.38	1537.73	1660.17	1830.17	1947.87
Sparcl1	SPARC-like 1 (hevin)	chr14:6985393-7016296	971.076	1518.92	1350.52	0.645388	0.475863	0.169525	0.0954325	0.287663	0.795014	1001.08	966.097	956.591	973.774	957.844	1298.8	2171.68	1349.23	1286.94	1487.95	1217.46	1000.22	1391.72	1792.69
Mfge8	milk fat globule-EGF factor 8 protein	chr1:141814238-141829653	328.774	1498.75	498.252	2.18859	0.59978	1.58881	0.000653095	0.0381196	0.000653095	359.201	323.231	345.584	371.006	244.846	2064.59	1841.8	1321.78	779.353	1486.23	541.72	635.706	347.044	468.538
Tpm1	tropomyosin 1, alpha	chr8:77147580-77174339	2607.64	1479.58	2253.44	-0.817553	-0.210616	-0.606937	0.0285474	0.74548	0.15768	2760.86	2277.29	2390.87	3171.32	2437.85	1696.54	1975.85	1385.66	1053.72	1286.14	2390.39	1723.98	2163.46	2735.91
Gnas	GNAS complex locus	chr3:178426254-178490285	2562.79	1330.9	3597.7	-0.945317	0.489358	-1.43468	0.00401415	0.298952	0.000653095	2761.05	2559.86	2425.94	1929.65	3137.45	1577.84	962.009	1576.75	1231.15	1306.73	4110.38	3506.4	4707.81	2066.2
Nexn	nexilin (F actin binding protein)	chr2:276130292-276151480	2502.21	1224.68	1989.61	-1.0308	-0.330721	-0.70008	0.00525255	0.561807	0.0825889	2337.42	2494.68	2385.43	3144.64	2148.9	1502.13	1469.17	973.839	1032.94	1145.31	2363.04	1417.33	1663.17	2514.88
B2m	beta-2 microglobulin	chr3:120627498-120633523	804.746	1210.02	859.829	0.588428	0.0955173	0.492911	0.0727836	0.861172	0.186406	900.835	737.062	855.399	750.922	779.51	1486.73	1009.25	1303.61	1069.98	1180.53	893.765	1009.5	815.253	720.804
Des	desmin	chr9:82325842-82333548	2011.54	1209.88	1523.88	-0.73343	-0.400546	-0.332883	0.0702618	0.463272	0.525218	2068.01	1778.69	1614.83	3114.95	1481.21	1819.98	1504.2	897.478	872.38	955.377	1937.2	1539.44	821.939	1796.95
Prelp	proline/arginine-rich end leucine-rich repeat protein	chr13:55804880-55814122	1173.56	1117.1	872.499	-0.0711365	-0.427668	0.356532	0.895128	0.253301	0.364027	1219.2	1228.76	1295.43	1087.37	1037.04	1010.84	1334.12	1154.83	903.767	1181.94	897.636	523.423	847.778	1221.16
Fhl1	four and a half LIM domains 1	chrX:153743579-153803160	1426.16	1093.57	1387.48	-0.383091	-0.0396688	-0.343422	0.375569	0.957406	0.483275	1518.89	1502.3	1595	1419.1	1095.51	1236.15	1407.05	906.269	823.332	1095.05	1664.77	1125.34	1117.86	1641.95
Myl12a	myosin, light chain 12A, regulatory, non-sarcomeric	chr9:118779615-118787301	906.797	1067.46	901.161	0.235335	-0.00899589	0.244331	0.516023	0.986652	0.531232	867.027	865.242	1043.02	942.871	815.83	1242.25	1437.88	909.33	727.206	1020.65	983.479	916.757	815.964	888.442
Cald1	caldesmon 1	chr4:61952323-62021822	1127.08	1051.46	1157.52	-0.100196	0.0384547	-0.138651	0.870215	0.957934	0.82327	992.375	1108.44	981.753	1314.37	1238.46	1195.77	1270.5	863.264	896.746	1031.01	1264.99	920.229	963.933	1480.94
Ifitm3	interferon induced transmembrane protein 3	chr1:220730714-220731824	625.545	1028.96	657.316	0.718004	0.0714733	0.64653	0.00267407	0.876781	0.0186805	653.735	604.514	686.502	614.647	568.328	1224.68	1073.17	1048.02	780.787	1018.15	574.359	1051.36	528.337	475.212
Rpl18a	ribosomal protein L18A	chr16:20150820-20152827	1260.99	996.748	1078.5	-0.339259	-0.225539	-0.11372	0.242647	0.539129	0.789989	1151.89	1343.46	1390.4	1324.93	1094.29	1044.17	956.93	980.929	933.038	1068.67	1222.23	913.484	1141.58	1036.7
Rpl13a	ribosomal protein L13A	chr1:102186219-102188910	901.43	944.678	872.326	0.0676061	-0.047349	0.114955	0.881352	0.923678	0.789716	719.572	946.157	799.368	945.388	1096.66	1183.48	843.461	865.106	1001.07	830.272	1045.72	765.146	869.022	809.411
Mcam	melanoma cell adhesion molecule	chr8:47091208-47099628	845.437	932.811	964.029	0.141887	0.189378	-0.0474911	0.803936	0.738997	0.946022	1020.77	762.923	702.6	1052.55	688.35	1377.94	865.215	907.746	567.852	945.3	1121.31	887.763	747.42	1099.62
Ltbp2	latent transforming growth factor beta binding protein 2	chr6:116956932-117049306	166.674	900.899	267.814	2.43434	0.6842	1.75014	0.000653095	0.0356358	0.000653095	181.65	132.645	160.145	210.888	148.043	1153.13	1013.55	839.984	521.963	975.872	278.443	334.039	182.833	275.94
Anp32b	acidic (leucine-rich) nuclear phosphoprotein 32 family, member B	chr5:66592161-66624323	984.87	851.843	896.695	-0.209347	-0.135315	-0.0740311	0.58744	0.771486	0.885082	916.326	948.239	788.613	1161.56	1109.62	1015.31	843.197	740.316	904.737	755.649	1034.95	872.107	669.79	1009.93
Hsp90b1	heat shock protein 90, beta, member 1	chr7:27345729-27359757	654.135	815.186	774.778	0.31754	0.244195	0.0733454	0.446373	0.614293	0.905136	547.981	567.861	670.135	634.389	850.31	859.503	681.203	997.875	673.812	863.535	837.289	683.425	644.932	933.467
Col3a1	collagen, type III, alpha 1	chr9:51689491-51725418	1537.49	814.713	813.061	-0.916209	-0.919137	0.00292814	0.0450681	0.0477139	0.997046	1690.55	1584.3	1633.26	1222.61	1556.71	886.791	521.376	1375.98	489.56	799.859	710.193	724.185	884.442	933.426
Postn	periostin, osteoblast specific factor	chr2:163331261-163362444	87.3925	810.296	199.5	3.21287	1.19081	2.02206	0.000653095	0.000653095	0.000653095	116.716	74.7131	71.6021	118.659	55.2727	1061.49	692.906	924.327	570.935	801.823	138.267	417.931	93.7595	148.042
Tpm4	tropomyosin 4	chr16:19244140-19258182	573.006	789.421	712.971	0.462244	0.315293	0.14695	0.0756372	0.32221	0.723873	511.769	572.407	585.55	585.746	609.558	772.784	811.441	797.089	682.749	883.039	568.834	843.897	627.004	812.15
Net1	neuroepithelial cell transforming 1	chr17:71714422-71724533	859.728	752.485	637.773	-0.192218	-0.430838	0.23862	0.729559	0.332829	0.653905	1326.18	753.078	767.194	861.799	590.39	709.601	1231.07	553.55	597.745	670.457	848.303	622.388	382.765	697.636
Hbb	hemoglobin, beta	chr1:175127945-175136083	368.607	750.616	156.889	1.02599	-1.23234	2.25833	0.0166006	0.00525255	0.000653095	155.163	23.7384	1395.63	34.135	234.375	1952.36	256.968	351.569	1050.98	141.203	257.363	47.3316	180.464	142.397
Fth1	ferritin, heavy polypeptide 1	chr1:232857003-233097316	708.207	732.471	682.93	0.0486006	-0.0524337	0.101034	0.925524	0.922896	0.837741	749.568	660.705	762.764	643.794	724.204	693.512	722.778	767.654	686.232	792.178	744.093	615.869	713.834	657.922
Lhfp	lipoma HMGIC fusion partner	chr2:161947946-162146115	638.602	724.334	707.662	0.181738	0.148142	0.033596	0.676839	0.764426	0.954869	683.643	635.605	680.494	609.32	583.949	712.005	720.833	876.891	502.99	808.952	713.602	669.904	654.579	792.562
Cyb5r3	cytochrome b5 reductase 3	chr7:124006941-124024503	572.755	721.741	656.292	0.333563	0.196419	0.137144	0.335562	0.649763	0.783136	645.484	549.864	600.845	520.335	547.248	899.949	667.534	768.22	468.135	804.868	687.824	599.501	578.666	759.176
Col18a1	collagen, type XVIII, alpha 1	chr20:14388742-14495241	355.424	713.376	415.605	1.00512	0.225672	0.779451	0.00357487	0.640265	0.0424125	402.764	319.586	352.532	423.827	278.409	920.484	596.574	870.28	384.765	794.776	399.817	495.487	339.19	427.924
Aebp1	AE binding protein 1	chr14:86792972-86802767	1345.84	708.606	878.26	-0.925448	-0.615783	-0.309665	0.0107371	0.171116	0.549265	1285.56	1294.44	1439.87	1445.25	1264.07	780.077	709.052	772.23	522.12	759.55	1012.11	580.258	778.162	1142.51
Cpe	carboxypeptidase E	chr16:26785641-26888882	365.536	698.118	562.667	0.933459	0.622269	0.31119	0.000653095	0.0336811	0.43154	401.07	381.553	371.321	352.637	321.098	789.889	808.941	742.532	467.638	681.593	695.889	633.324	400.881	520.575
Col1a1	collagen, type I, alpha 1	chr10:82563433-82580364	1516	691.851	648.44	-1.13173	-1.22522	0.0934879	0.0204199	0.0132558	0.910523	1724.99	1442.21	1827.9	1118.32	1466.57	798.958	250.073	1360.41	375.307	674.502	515.483	495.526	798.086	784.667
Rhoa	ras homolog family member A	chr8:116455264-116463857	633.856	681.095	804.308	0.1037	0.343593	-0.239893	0.785195	0.242267	0.465539	641.833	649.842	657.935	608.231	611.441	657.945	649.749	760.847	631.241	705.692	743.835	825.64	827.533	820.226
Aqp1	aquaporin 1	chr4:150203460-150215641	378.456	676.098	410.121	0.837106	0.115922	0.721184	0.00601445	0.810092	0.0324166	409.986	361.477	316.956	490.144	313.719	910.585	759.417	723.708	353.692	633.089	405.637	561.927	330.579	342.34
Aplp2	amyloid beta (A4) precursor-like protein 2	chr8:32323515-32353638	757.731	673.961	696.63	-0.169022	-0.121295	-0.0477275	0.745816	0.838869	0.941939	735.851	724.841	779.484	819.284	729.197	804.575	689.234	687.565	584.308	604.121	798.766	702.136	579.773	705.843
Cd63	Cd63 molecule	chr7:3303448-3305798	561.717	664.577	587.308	0.242594	0.0642733	0.17832	0.446967	0.886414	0.640384	607.577	604.321	542.966	535.392	518.33	826.035	668.956	670.681	480.734	676.48	580.411	740.635	494.932	533.254
Laptm4a	lysosomal protein transmembrane 4 alpha	chr6:43823228-43841057	844.734	651.069	696.945	-0.375687	-0.277453	-0.0982345	0.223054	0.453036	0.835077	908.337	851.117	864.223	791.228	808.764	774.542	595.175	672.484	563.493	649.648	814.544	685.532	611.887	675.815
Serping1	serpin peptidase inhibitor, clade G (C1 inhibitor), member 1	chr3:78681825-78691120	139.952	650.823	141.505	2.21733	0.0159169	2.20141	0.000653095	0.973754	0.000653095	159.939	143.022	171.494	94.0413	131.266	584.079	1060.92	563.453	505.432	540.231	139.613	163.313	129.358	133.735
Lmod1	leiomodin 1 (smooth muscle)	chr13:57197721-57240449	963.412	646.325	882.192	-0.575893	-0.127061	-0.448832	0.153061	0.857374	0.351624	906.319	834.036	710.653	1057.67	1308.39	609.119	991.44	545.524	576.84	508.702	934.579	505.844	730.477	1357.87
Hsp90ab1	heat shock protein 90 alpha (cytosolic), class B member 1	chr9:16706511-16711884	900.424	638.102	1174.28	-0.496817	0.383095	-0.879912	0.150173	0.386324	0.0103657	602.463	968.23	1037.01	923.876	970.537	566.386	553.97	620.604	737.873	711.678	1242.12	827.787	1311.13	1316.06
Atp5i	ATP synthase, H+ transporting, mitochondrial Fo complex, subunit E	chr14:2323661-2324790	891.872	631.628	961.145	-0.497763	0.107917	-0.60568	0.0316662	0.785846	0.0126641	834.675	782.319	700.776	955.052	1186.54	834.137	373.583	625.322	767.416	557.68	1113.35	932.187	1033.27	765.774
Car3	carbonic anhydrase 3	chr2:107901281-107909241	139.975	628.762	176.653	2.16734	0.335744	1.8316	0.000653095	0.299699	0.000653095	137.855	57.7873	188.495	45.0807	270.658	389.794	25.2098	729.382	1733.7	265.721	59.9217	137.964	293.497	215.228
Dcn	decorin	chr7:38783713-38823740	693.436	627.121	463.032	-0.145019	-0.582652	0.437633	0.750601	0.0653449	0.189699	869.634	797.201	881.132	309.401	609.814	450.701	959.116	635.391	596.203	494.195	471.865	304.84	466.628	608.796
Timp2	TIMP metallopeptidase inhibitor 2	chr10:106973462-107021070	513.926	620.25	488.081	0.271289	-0.0744399	0.345729	0.437536	0.881773	0.324836	534.658	537.304	553.304	458.961	485.401	623.828	600.827	756.096	490.598	629.9	407.318	433.576	496.961	614.469
Serpine2	serpin peptidase inhibitor, clade E (nexin, plasminogen activator inhibitor type 1), member 2	chr9:85312140-85375551	454.543	614.717	607.572	0.435505	0.418638	0.0168668	0.161075	0.209127	0.977593	508.498	398.189	478.286	456.52	431.224	735.795	456.333	686.239	421.651	773.568	628.173	589.329	557.112	655.675
Thrsp	thyroid hormone responsive	chr1:168587723-168592048	1098.06	611.731	2231.96	-0.843988	1.02336	-1.86734	0.0195196	0.00563845	0.000653095	881.692	735.915	989.388	663.153	2220.15	303.288	178.261	782.562	1487.99	306.559	2329.96	2259.18	3270.36	1068.36
Flna	filamin A, alpha	chr1:152204098-152227391	1002.26	605.874	827.926	-0.726169	-0.275685	-0.450484	0.145513	0.712572	0.434254	1074.41	936.083	966.848	1267.12	766.849	731.133	756.67	549.593	370.276	621.697	813.647	689.015	832.325	976.716
Ctsb	cathepsin B	chr15:50081534-50102407	446.246	605.661	445.618	0.44067	-0.00203205	0.442702	0.141448	0.996979	0.168096	468.329	432.085	500.416	405.057	425.344	630.352	629.752	634.922	513.091	620.188	439.6	539.012	403.477	400.384
Hspb1	heat shock protein 1	chr12:25837102-25838663	1827.88	604.507	1762.52	-1.59634	-0.0525318	-1.54381	0.000653095	0.932745	0.000653095	1347.94	2397.96	3214.82	1611.02	567.679	664.687	786.438	440.336	346.438	784.636	1860.87	1171.85	2079.49	1937.88
Clu	clusterin	chr15:48926520-48986864	673.853	598.953	718.896	-0.169992	0.0933488	-0.263341	0.734192	0.878516	0.564602	640.146	724.441	926.288	596.652	481.74	637.57	686.986	664.133	437.378	568.697	666.318	917.405	608.188	683.674
Tagln2	transgelin 2	chr13:95407076-95413997	594.633	598.726	481.486	0.00989754	-0.304505	0.314403	0.983893	0.37317	0.365775	644.302	617.356	687.496	620.063	403.947	816.726	533.438	641.749	393.818	607.9	459.684	628.699	396.484	441.077
Nucb2	nucleobindin 2	chr1:192078544-192114979	376.231	596.592	351.085	0.665126	-0.0997971	0.764923	0.0110649	0.815189	0.00221111	366.952	365.045	349.029	391.83	408.298	643.753	697.949	595.387	546.02	499.85	356.408	338.865	311.453	397.615
Cyr61	cysteine-rich, angiogenic inducer, 61	chr2:270055953-270058912	532.586	591.274	444.698	0.150811	-0.260188	0.410999	0.757728	0.605679	0.332829	1013.19	446.831	409.525	423.354	370.028	705.172	850.512	376.54	467.512	556.633	174.855	961.423	346.587	295.928
Rpl35	ribosomal protein L35	chr3:28516638-28519600	640.7	586.866	583.685	-0.126617	-0.134458	0.00784091	0.724122	0.721511	0.987756	605.494	688.638	669.949	635.227	604.189	589.368	557.246	539.542	647.442	600.731	719.817	575.783	547.585	491.555
Cd59	CD59 molecule, complement regulatory protein	chr3:100650410-100667824	562.25	585.191	547.859	0.0576952	-0.0374076	0.0951028	0.904337	0.944269	0.841854	623.98	526.38	530.533	573.446	556.911	713.036	607.481	554.712	498.51	552.213	595.221	488.686	501.802	605.726
Pdia3	protein disulfide isomerase family A, member 3	chr3:119916771-119940826	503.278	583.159	497.586	0.212534	-0.016409	0.228943	0.57147	0.975603	0.570534	539.979	492.372	524.152	462.885	497.002	678.976	515.533	665.5	462.805	592.981	555.726	538.567	398.948	497.104
Calm1	calmodulin 1	chr6:133444206-133452258	550.267	576.198	606.896	0.066433	0.141318	-0.0748845	0.88608	0.74205	0.877115	581.917	515.64	546.156	553.192	554.429	658.63	497.294	649.757	478.334	596.974	573.665	676.626	546.147	631.146
Ncl	nucleolin	chr9:93097880-93106405	599.719	569.729	675.146	-0.0740093	0.170914	-0.244923	0.889161	0.727888	0.575472	516.183	591.64	533.017	621.693	736.06	513.686	623.347	472.66	745.649	493.305	727.38	635.541	647.855	689.81
Col6a2	collagen, type VI, alpha 2	chr20:14931525-14959214	478.083	569.251	338.726	0.251805	-0.497141	0.748946	0.567239	0.156912	0.0177996	478.082	492.979	548.551	537.762	333.041	735.264	581.001	596.962	331.487	601.542	373.153	347.347	260.163	374.242
Fstl1	follistatin-like 1	chr11:68885415-68938107	697.467	564.382	559.147	-0.305453	-0.318897	0.0134442	0.418696	0.425278	0.981183	746.815	660.36	714.673	702.22	663.265	547.376	428.33	733.375	451.037	661.79	491.02	476.82	562.043	706.703
Egr1	early growth response 1	chr18:27369517-27371716	602.048	561.696	293.97	-0.100087	-1.03421	0.934122	0.842164	0.000653095	0.00121133	1261.41	534.007	506.316	436.002	272.499	571.403	311.682	730.207	514.047	681.144	200.386	474.774	282.417	218.303
Il11ra1	interleukin 11 receptor, alpha chain 1	chr5:62676350-62687950	755.358	559.937	555.532	-0.431895	-0.443289	0.0113941	0.180835	0.198129	0.984365	652.674	789.724	726.465	846.518	761.407	799.244	533.875	496.592	445.168	524.807	755.502	474.608	411.704	580.315
Naca	nascent polypeptide-associated complex alpha subunit	chr7:2438053-2450445	688.434	553.293	661.251	-0.315276	-0.0581202	-0.257156	0.298807	0.905905	0.46761	682.841	700.904	672.302	633.074	753.05	520.011	561.734	539.949	636.75	508.018	758.561	593.773	638.813	653.858
Cnn1	calponin 1, basic, smooth muscle	chr8:23167869-23176532	1029.57	551.227	931.478	-0.901326	-0.144451	-0.756874	0.000653095	0.769417	0.010049	1118	916.526	1000.24	1201.32	911.771	726.241	574.316	504.515	376.263	574.802	862.051	673.306	1051.21	1139.34
Rhob	ras homolog family member B	chr6:43472712-43474862	909.245	544.282	739.288	-0.740316	-0.298534	-0.441783	0.00969275	0.496552	0.228242	1023.45	794.513	987.733	978.617	761.909	577.172	670.87	551.601	395.533	526.233	624.814	990.791	898.136	443.409
Retn	resistin	chr12:4364006-4365747	139.397	536.294	203.652	1.94383	0.546907	1.39692	0.000653095	0.0346397	0.000653095	93.0196	75.9453	139.51	97.4105	291.098	474.8	512.509	507.022	958.997	228.143	260.069	226.952	184.219	143.366
Gabarap	GABA(A) receptor-associated protein	chr10:56346406-56349342	503.49	524.183	464.435	0.0581101	-0.116486	0.174596	0.894778	0.773626	0.632174	491.392	510.38	496.806	534.016	484.854	707.565	440.679	490.987	460.535	521.151	534.921	483.994	435.236	403.588
Lmcd1	LIM and cysteine-rich domains 1	chr4:207494654-207554220	625.239	508.208	756.857	-0.29899	0.275613	-0.574603	0.395035	0.507623	0.0748091	401.699	676.942	895.477	514.617	637.461	555.122	581.624	431.142	336.763	636.387	1083.22	607.202	822.073	514.933
Pam	peptidylglycine alpha-amidating monooxygenase	chr9:110584150-110737325	451.012	495.915	481.538	0.136927	0.0944852	0.0424423	0.781205	0.869479	0.946608	517.832	446.341	491.242	426.062	373.582	548.286	508.057	564.158	350.604	508.469	467.84	459.898	444.404	554.009
Glul	glutamate-ammonia ligase	chr13:76294470-76303626	204.741	486.546	358.743	1.24877	0.809148	0.439626	0.00173202	0.00401415	0.36367	287.693	138.709	184.328	148.581	264.394	216.457	525.527	219.058	1257.66	214.027	362.643	368.18	530.389	173.759
S100a4	S100 calcium-binding protein A4	chr2:209431372-209433679	196.995	485.638	269.088	1.30173	0.449924	0.851803	0.000653095	0.0655339	0.000653095	215.672	222.294	209.346	179.63	158.031	668.154	443.47	426.986	267.647	621.934	235.62	385.058	225.14	230.535
Nucb1	nucleobindin 1	chr1:102553245-102590188	377.156	485.114	392.083	0.363164	0.056001	0.307163	0.255664	0.914129	0.40783	385.469	383.609	411.952	385.366	319.382	514.196	524.867	525.968	368.588	491.951	409.208	355.477	345.49	458.158
Itgb1	integrin, beta 1	chr19:72324611-72372325	373.91	479.057	415.058	0.357507	0.150622	0.206885	0.336006	0.75477	0.669811	438.206	339.924	364.526	378.629	348.263	488.122	703.33	455.014	343.355	405.462	410.838	391.432	383.312	474.648
Fbln5	fibulin 5	chr6:134856694-134935853	500.528	476.928	438.539	-0.0696798	-0.190746	0.121066	0.890288	0.663368	0.796741	499.127	491.877	601.006	414.724	495.908	480.673	394.145	492.121	420.455	597.247	440.921	336.388	440.197	536.651
Dmp1	dentin matrix acidic phosphoprotein 1	chr14:6878104-6885158	519.738	472.53	421.893	-0.137379	-0.300908	0.163529	0.77347	0.447691	0.729597	565.468	526.484	413.133	729.864	363.739	532.263	635.145	365.792	308.905	520.545	516.866	391.023	338.804	440.879
Lgals1	lectin, galactoside-binding, soluble, 1	chr7:120144874-120147981	465.01	470.81	491.181	0.0178829	0.0789944	-0.0611115	0.9677	0.844211	0.889794	432.739	390.502	478.967	548.96	473.882	654.072	368.404	501.819	302.243	527.511	418.483	556.184	535.477	454.582
Hspa5	heat shock protein 5	chr3:19157873-19162333	337.767	460.436	445.741	0.446971	0.400177	0.0467948	0.151967	0.238821	0.932896	335.711	261.952	316.074	333.909	441.191	485.169	353.721	662.134	308.014	493.142	480.918	437.153	359.937	504.955
Clta	clathrin, light chain A	chr5:64013653-64031649	452.076	452.287	427.71	0.000671614	-0.079934	0.0806056	0.998275	0.853096	0.854814	426.345	422.634	445.331	472.685	493.388	434.492	481.353	454.723	459.032	431.835	456.616	397.187	423.448	433.589
Pbxip1	pre-B-cell leukemia homeobox interacting protein 1	chr2:208180634-208190540	575.593	451.756	522.866	-0.349506	-0.138607	-0.210899	0.34033	0.79044	0.653005	606.627	568.541	545.849	660.107	496.839	486.472	590.18	407.479	338.033	436.614	545.451	414.659	477.725	653.629
C1r	complement component 1, r subcomponent	chr4:224144563-224155321	352.073	451.194	319.018	0.357871	-0.142238	0.500109	0.268606	0.748338	0.115923	381.329	366.11	391.266	284.891	336.771	441.228	464.51	502.315	417.829	430.086	342.999	331.185	277.501	324.386
Pnp	purine nucleoside phosphorylase	chr15:31708633-31716284	399.715	449.319	316.572	0.168768	-0.336437	0.505206	0.630013	0.255278	0.0598633	452.112	377.44	382.746	408.22	378.058	515.849	482.009	399.175	405.732	443.831	397.931	268.89	276.576	322.893
Msn	moesin	chrX:66068479-66135838	333.206	447.74	453.868	0.426249	0.445858	-0.0196092	0.13466	0.145988	0.972626	309.832	366.007	334.362	358.7	297.128	439.707	451.801	451	383.599	512.594	362.377	494.84	402.822	555.432
Bsg	basigin	chr7:13044571-13051789	417.568	442.739	431.63	0.0844467	0.0477863	0.0366604	0.845171	0.922683	0.942631	388.643	387.038	417.82	434.857	459.48	509.302	360.076	472.308	393.321	478.689	445.581	401.293	502.993	376.654
Frzb	frizzled-related protein	chr3:74196162-74229331	806.328	441.656	657.722	-0.868444	-0.293889	-0.574555	0.00313022	0.502846	0.0860312	889.671	920.69	831.97	697.894	691.414	437.758	439.194	438.67	394.633	498.025	723.078	553.588	584.671	769.55
Gnai2	guanine nucleotide binding protein (G protein), alpha inhibiting activity polypeptide 2	chr8:115726561-115746724	558.236	441.459	476.827	-0.338598	-0.22741	-0.111189	0.306128	0.57369	0.810916	569.932	577.983	593.346	532.394	517.527	454.304	448.687	467.567	369.034	467.701	455.549	422.487	464.797	564.476
Rps24	ribosomal protein S24	chr16:752375-756963	494.042	436.365	493.432	-0.179095	-0.00178249	-0.177313	0.553984	0.996979	0.600543	500.695	522.131	461.378	468.349	517.653	558.252	377.465	440.403	423.081	382.627	630.042	429.458	424.023	490.204
Sh3bgrl	SH3 domain binding glutamic acid-rich protein like	chrX:80392504-80491085	442.042	433.308	535.599	-0.0287883	0.276971	-0.305759	0.95932	0.504428	0.44598	514.011	478.415	496.079	341.093	380.61	486.295	531.15	378.084	345.072	425.941	586.897	485.585	466.028	603.886
Plac9	placenta-specific 9	chr16:3260476-4228653	324.341	431.504	302.985	0.411862	-0.0982615	0.510124	0.448775	0.906699	0.336413	290.67	316.2	298.484	383.915	332.435	588.86	366.887	439.979	307.968	453.824	332.408	302.725	281.331	295.477
Arpc2	actin related protein 2/3 complex, subunit 2	chr9:81285097-81315844	362.652	427.441	410.799	0.237141	0.179846	0.0572949	0.457853	0.628004	0.904838	429.847	324.109	396.905	348.282	314.117	470.211	440.044	458.384	323.674	444.894	396.743	430.879	386.403	429.17
Uba52	ubiquitin A-52 residue ribosomal protein fusion product 1	chr16:20524449-20526606	517.581	425.808	482.081	-0.281584	-0.102511	-0.179074	0.294337	0.795313	0.59602	455.822	521.286	524.669	566.01	520.119	496.505	355.424	378.02	461.913	437.176	537.843	428.577	524.371	437.533
Fxyd1	FXYD domain-containing ion transport regulator 1	chr1:90639291-90643313	819.939	425.759	615.905	-0.94548	-0.412809	-0.532672	0.000653095	0.130585	0.0324166	858.002	847.194	925.616	895.884	573.001	535.577	408.158	422.443	303.015	459.601	679.045	542.451	610.764	631.362
App	amyloid beta (A4) precursor protein	chr11:28049785-28265107	418.754	422.947	431.309	0.0143767	0.0426205	-0.0282438	0.977421	0.936545	0.958762	430.906	435.993	431.104	357.062	438.703	345.123	451.541	503.042	443.078	371.953	426.951	350.527	430.549	517.209
Fxyd5	FXYD domain-containing ion transport regulator 5	chr1:90620341-90629734	94.6877	421.618	164.793	2.15469	0.799403	1.35528	0.000653095	0.000653095	0.000653095	70.8903	93.7966	106.251	100.473	102.027	533.537	349.968	409.691	231.636	583.258	143.792	259.197	138.081	118.101
Gas6	growth arrest specific 6	chr16:80701558-80732410	348.16	420.202	270.582	0.271331	-0.363684	0.635015	0.432402	0.26727	0.029627	346.797	351.393	402.955	312.181	327.475	372.846	366.605	487.49	483.137	390.931	324.263	206.419	243.101	308.547
Ddx5	DEAD (Asp-Glu-Ala-Asp) box helicase 5	chr10:94726625-94762046	505.526	412.467	474.089	-0.293506	-0.092627	-0.200879	0.418696	0.85713	0.646133	502.424	535.054	499.257	514.211	476.683	363.068	429.659	413.228	457.828	398.551	525.5	444.924	425.654	500.278
Dap	death-associated protein	chr2:103949820-104003059	369.035	409.734	400.026	0.150928	0.116335	0.0345928	0.691581	0.782371	0.944648	348.356	397.384	432.557	305.395	361.484	412.812	376.662	422.308	347.043	489.845	423.823	355.893	378.951	441.438
Aes	amino-terminal enhancer of split	chr7:11180238-11187126	714.203	409.22	553.711	-0.803459	-0.367201	-0.436259	0.00121133	0.262733	0.14491	659.869	698.071	753.695	792.527	666.855	503.56	398.066	404.131	302.61	437.732	600.214	480.361	539.244	595.026
Capzb	capping protein (actin filament) muscle Z-line, beta	chr5:161383343-161482718	603.824	404.027	421.73	-0.579675	-0.517807	-0.0618673	0.0331831	0.0807808	0.900723	669.352	642.081	590.302	630.182	487.201	620.106	363.083	381.865	285.934	369.149	528.997	412.731	328.109	417.084
Pdlim7	PDZ and LIM domain 7	chr17:11762296-11777443	772.584	398.117	532.807	-0.956501	-0.536078	-0.420423	0.000653095	0.0955352	0.194119	634.021	799.908	817.844	1070.71	540.44	569.918	450.544	347.486	223.901	398.734	610.712	546.547	454.38	519.591
Rplp0	ribosomal protein, large, P0	chr12:48588974-48592243	426.738	396.647	372.052	-0.105495	-0.197847	0.0923519	0.78218	0.565976	0.82693	405.967	403.475	451.349	477.653	395.249	447.896	406.587	340.562	392.49	395.702	398.139	393.847	353.978	342.244
Pmepa1	prostate transmembrane protein, androgen induced 1	chr3:177360058-177366886	380.924	392.042	394.151	0.0415043	0.049244	-0.00773977	0.917834	0.914974	0.987112	338.759	306.818	402.353	421.187	435.503	430.984	380.442	425.825	223.827	499.133	381.407	295.726	287.624	611.847
Sat1	spermidine/spermine N1-acetyl transferase 1	chrX:43930759-43934047	340.101	388.12	385.833	0.190539	0.182012	0.00852693	0.577871	0.633135	0.988163	327.867	454.946	406.652	294.571	216.47	421.359	501.468	326.796	345.876	345.102	367.719	547.501	348.671	279.44
Itm2b	integral membrane protein 2B	chr15:58804730-59000926	421.762	386.903	381.977	-0.12446	-0.142945	0.0184854	0.774516	0.755411	0.97527	451.026	473.809	477.445	338.577	367.955	342.708	380.898	430.318	384.644	395.945	403.197	329.464	379.757	415.489
Srsf5	serine/arginine-rich splicing factor 5	chr6:112776229-112780506	449.668	386.336	435.236	-0.219004	-0.0470618	-0.171942	0.501486	0.921602	0.660009	415.221	462.677	417.537	486.255	466.648	396.051	461.746	299.84	455.433	318.608	559.538	361.841	344.953	474.611
Ppp1r14a	protein phosphatase 1, regulatory (inhibitor) subunit 14A	chr1:88407560-88411822	1038.2	385.454	685.921	-1.42945	-0.597965	-0.831483	0.000653095	0.0212459	0.000653095	993.575	814.766	920.894	1454.17	1007.58	521.994	376.899	353.309	262.371	412.699	783.48	491.967	701.834	766.404
Gsn	gelsolin	chr3:19799928-19826452	626.014	384.462	419.639	-0.703355	-0.577045	-0.12631	0.0339158	0.0891997	0.820432	720.701	689.597	682.142	359.627	678.003	169.675	449.155	284.902	784.551	234.025	442.626	182.779	522.78	530.372
Ywhae	tyrosine 3-monooxygenase/tryptophan 5-monooxygenase activation protein, epsilon polypeptide	chr10:64084792-64121811	409.922	384.291	465.339	-0.0931477	0.182933	-0.276081	0.826154	0.643089	0.420948	428.356	385.215	400.666	384.338	451.033	354.463	360.625	405.392	449.917	351.06	454.943	483.566	486.17	436.676
Rpl4	ribosomal protein L4	chr8:68827917-68833041	545.237	382.776	401.815	-0.510383	-0.440353	-0.07003	0.0561191	0.139893	0.87928	578.943	631.03	558.806	493.362	464.046	457.656	370.255	348.001	396.124	341.845	525.409	363.841	321.251	396.757
Ptma	prothymosin alpha	chr9:93273332-93277372	315.992	381.989	358.018	0.273642	0.180144	0.0934976	0.351476	0.612308	0.822595	300.934	307.49	279.779	345.753	346.006	468.507	354.645	358.548	327.464	400.78	345.424	370.217	313.042	403.39
Tpt1	tumor protein, translationally-controlled 1	chr15:61598789-61601611	341.034	378.562	374.7	0.150616	0.135821	0.0147946	0.652848	0.723228	0.977086	345.783	312.352	394.867	290.22	361.947	361.81	377.749	390.5	402.851	359.902	397.784	379.988	410.822	310.206
Ecm1	extracellular matrix protein 1	chr2:217345267-217350435	275.015	376.222	260.796	0.452074	-0.0765858	0.52866	0.0930732	0.864273	0.0575423	297.582	266.894	310.713	288.961	210.926	390.227	422.561	356.725	257.361	454.237	249.039	215.198	259.546	319.403
Gabarapl1	GABA(A) receptor-associated protein like 1	chr4:211937474-211946617	301.652	374.442	328.476	0.311855	0.122903	0.188952	0.300345	0.76448	0.620857	324.42	330.151	296.618	264.182	292.89	323.599	513.453	306.926	413.411	314.82	401.6	264.961	290.006	357.339
Atp5b	ATP synthase, H+ transporting, mitochondrial F1 complex, beta polypeptide	chr7:2484094-2490338	550.703	366.077	895.602	-0.589126	0.701584	-1.29071	0.043336	0.0373401	0.000653095	526.298	408.565	469.821	430.884	917.946	265.541	223.447	389.219	668.017	284.162	896.463	747.458	1341.82	596.665
Golim4	golgi integral membrane protein 4	chr2:193658082-193749106	452.08	364.83	557.721	-0.309353	0.302966	-0.612318	0.372622	0.468833	0.0657498	426.549	429.569	449.849	495.1	459.332	339.032	381.385	380.273	344.467	378.993	548.068	347.343	525.78	809.693
Itga8	integrin, alpha 8	chr17:80956110-81304978	448.226	359.41	468.445	-0.318595	0.0636534	-0.382248	0.451394	0.923066	0.386278	523.889	436.874	431.916	453.779	394.672	347.755	427.347	357.082	288.801	376.065	463.109	376.551	450.776	583.344
Cd74	Cd74 molecule, major histocompatibility complex, class II invariant chain	chr18:55305872-55315246	28.3329	357.868	36.9421	3.65888	0.382787	3.27609	0.000653095	0.176974	0.000653095	22.7152	19.0338	39.9597	20.9258	39.0301	311.621	237.703	600.803	392.442	246.769	36.8882	46.4652	39.6917	24.7232
Rpl17	ribosomal protein L17	chr18:70108977-70112083	468.28	350.349	384.486	-0.418576	-0.284439	-0.134136	0.0811477	0.344594	0.715379	454.254	507.457	536.974	409.315	433.398	343.613	406.341	353.94	331.294	316.559	483.067	384.703	316.184	353.99
Apoe	apolipoprotein E	chr1:81878371-81882298	188.644	350.33	153.648	0.893048	-0.296038	1.18909	0.000653095	0.308829	0.000653095	167.423	206.683	189.175	168.555	211.385	239.286	394.227	384.959	486.126	247.05	152.227	177.258	179.534	105.573
LOC100188932	NA	chr6:36651830-36653055	404.042	348.553	346.611	-0.213126	-0.221186	0.00806052	0.46945	0.471867	0.986652	455.59	397.421	420.664	419.433	327.103	497.567	312.407	316.285	243.375	373.133	364.635	356.073	325.505	340.233
Pea15	phosphoprotein enriched in astrocytes 15	chr13:95100948-95110571	249.226	346.068	264.414	0.473603	0.0853448	0.388258	0.0874591	0.845899	0.218772	242.368	256.654	270.967	243.782	232.358	463.66	288.807	372.428	218.256	387.189	272.386	277.046	238.853	269.371
Cav1	caveolin 1, caveolae protein	chr4:45203493-45236457	428.734	345.323	468.53	-0.312133	0.12806	-0.440193	0.342513	0.789795	0.185916	481.975	377.917	435.647	380.627	467.502	340.104	392.326	312.173	353.904	328.111	507.811	330.125	465.962	570.223
Actn4	actinin alpha 4	chr1:88246906-88327926	303.193	344.678	306.143	0.185009	0.0139674	0.171042	0.67071	0.981067	0.723398	311.475	273.254	290.325	397.024	243.887	453.681	327.1	356.627	221.743	364.237	276.309	283.088	310.62	354.555
Cd9	CD9 molecule	chr4:224989634-225022563	418.958	344.603	371.627	-0.281869	-0.172948	-0.10892	0.333951	0.640524	0.789716	453.324	440.043	459.797	375.063	366.561	377.814	398.361	297.684	293.516	355.64	444.962	304.611	322.709	414.226
Ndufb9	NADH dehydrogenase (ubiquinone) 1 beta subcomplex, 9	chr7:99411586-99417933	487.172	343.805	734.38	-0.50284	0.592095	-1.09494	0.032673	0.0220975	0.000653095	482.177	437.322	461.11	447.13	608.122	313.434	243.38	323.21	515.889	323.115	812.096	753.282	911.707	460.436
Dusp1	dual specificity phosphatase 1	chr10:16867380-16870164	480.611	342.452	294.387	-0.488966	-0.707156	0.21819	0.11936	0.0256739	0.567756	890.229	316.882	442.807	499.028	254.107	420.614	272.375	405.654	246.001	367.616	277.835	422.907	266.219	210.586
Zfp36	zinc finger protein 36	chr1:86595417-86597898	486.454	341.506	244.056	-0.510393	-0.995093	0.4847	0.109335	0.000653095	0.0825889	1003.54	283.231	451.825	456.736	236.934	347.469	355.243	372.089	338.543	294.186	266.607	286.095	231.582	191.939
Serpinh1	serpin peptidase inhibitor, clade H (heat shock protein 47), member 1, (collagen binding protein 1)	chr1:170503467-170510765	452.98	341.359	465.249	-0.408155	0.0385573	-0.446713	0.177408	0.941978	0.166314	399.219	425.004	530.895	435.9	473.882	384.684	214.569	515.058	197.91	394.575	445.565	401.213	506.434	507.786
Timp3	TIMP metallopeptidase inhibitor 3	chr7:23553830-23958150	519.003	339.883	399.771	-0.610704	-0.376569	-0.234136	0.0183908	0.263364	0.524018	507.573	646.44	545.781	358.052	537.17	305.487	324.229	355.642	353.486	360.573	358.984	282.18	445.46	512.462
Lrrfip1	leucine rich repeat (in FLII) interacting protein 1	chr9:97871991-97939938	352.759	338.781	430.81	-0.0583291	0.288368	-0.346697	0.912551	0.496162	0.389699	333.143	359.309	387.212	390.125	294.006	311.512	470.107	289.965	276.401	345.924	433.28	279.578	409.931	600.452
Lamp1	lysosomal-associated membrane protein 1	chr16:81175826-81192800	309.787	336.934	334.359	0.121191	0.110123	0.0110684	0.762361	0.795962	0.982218	360.041	307.802	319.061	270.564	291.465	325.127	326.049	400.419	292.813	340.263	298.022	319.59	368.817	351.007
Kank2	KN motif and ankyrin repeat domains 2	chr8:22846153-22875377	530.617	336.764	429.939	-0.655935	-0.30354	-0.352394	0.0483178	0.525331	0.409369	567.43	495.464	456.781	558.683	574.727	381.084	416.516	327.205	244.471	314.542	538.883	333.701	295.289	551.882
Atf4	activating transcription factor 4	chr7:121469310-121470587	398.553	335.674	410.112	-0.247711	0.0412448	-0.288956	0.418019	0.933239	0.370468	380.184	399.011	451.54	415.975	346.056	352.77	373.527	311.114	317.947	323.012	412.767	475.304	464.356	288.02
Ctsl1	cathepsin L1	chr17:1861402-1867561	163.139	335.342	213.101	1.03953	0.385436	0.654095	0.000653095	0.15099	0.00822323	166.641	166.858	152.032	124.871	205.292	235.953	453.952	313.199	422.491	251.113	195.123	207.178	230.767	219.335
Cox6a1	cytochrome c oxidase, subunit VIa, polypeptide 1	chr12:48817757-48820811	507.36	334.067	682.308	-0.602871	0.427414	-1.03029	0.00525255	0.112965	0.000653095	525.036	447.757	511.385	481.87	570.75	346.868	267.367	351.201	361.101	343.798	685.242	634.423	886.746	522.82
Eef2	eukaryotic translation elongation factor 2	chr7:11568906-11574177	383.544	332.742	377.606	-0.204988	-0.0225077	-0.18248	0.591792	0.969925	0.671266	344.07	423.824	396.337	355.207	398.279	284.025	377.195	352.451	332.019	318.019	373.903	330.172	418.458	387.893
Rnd3	Rho family GTPase 3	chr3:41757185-41774539	358.558	331.981	434.365	-0.111107	0.276703	-0.38781	0.802515	0.453036	0.230699	139.675	497.872	383.789	319.561	451.893	381.947	453.042	263.134	255.407	306.371	385.387	394.568	459.565	497.941
Hnrnpa2b1	heterogeneous nuclear ribonucleoprotein A2/B1	chr4:145903679-145907465	499.958	331.581	559.507	-0.592444	0.162347	-0.754792	0.00969275	0.675711	0.00173202	460.066	519.441	518.472	528.426	473.386	303.8	362.706	346.255	344.274	300.873	691.987	541.096	473.209	531.735
Ubb	ubiquitin B	chr10:48664460-48664916	340.111	331.228	324.797	-0.0381806	-0.0664665	0.0282859	0.925692	0.870565	0.951757	355.024	369.456	449.395	291.04	235.641	372.551	325.443	341.845	279.885	336.416	303.816	259.527	398.114	337.731
Psap	prosaposin	chr20:31629575-31668605	366.575	327.46	384.785	-0.162787	0.0699462	-0.232734	0.682337	0.894361	0.547085	385.537	358.604	376.434	353.552	358.747	327.889	346.925	361.47	308.293	292.724	407.36	356.296	410.074	365.41
Dkk3	dickkopf WNT signaling pathway inhibitor 3	chr1:183920085-183962438	400.757	327.243	341.76	-0.292364	-0.229744	-0.0626205	0.469862	0.628217	0.917688	422.942	407.963	423.207	359.153	390.518	359.229	289.916	353.8	224.844	408.426	324.338	284.516	325.38	432.804
P4hb	prolyl 4-hydroxylase, beta polypeptide	chr10:109329595-109341091	252.585	324.96	257.34	0.363494	0.0269068	0.336588	0.216415	0.957934	0.311714	274.128	228.148	258.763	253.749	248.136	382.344	271.997	389.754	234.084	346.62	221.284	302.783	227.839	277.454
Atpif1	ATPase inhibitory factor 1	chr5:154387823-154391541	391.993	323.551	327.992	-0.276834	-0.257167	-0.0196671	0.300168	0.38422	0.966323	424.496	395.004	403.248	396.088	341.127	417.161	327.183	311.88	273.256	288.275	399.594	308.407	255.705	348.261
Cox6c	cytochrome c oxidase, subunit VIc	chr7:74880031-74892505	482.999	323.139	657.578	-0.579865	0.445141	-1.02501	0.00677966	0.0918375	0.000653095	512.116	421.701	444.722	468.345	568.11	332.673	248.909	347.13	412.121	274.863	850.179	683.127	655.355	441.649
Rcn3	reticulocalbin 3, EF-hand calcium binding domain	chr1:102141918-102151178	350.323	318.975	300.987	-0.13524	-0.218982	0.0837414	0.72603	0.526948	0.850548	373.643	309.169	367.89	395.514	305.398	394.347	229.273	374.04	200.161	397.054	296.545	307.372	269.463	330.569
Cox4i1	cytochrome c oxidase subunit IV isoform 1	chr19:64965334-64971575	458.719	315.309	633.989	-0.540847	0.466847	-1.00769	0.0183908	0.0851517	0.000653095	442.511	376.583	432.338	445.345	596.818	282.042	275.387	298.154	470.161	250.799	714.213	610.33	809.826	401.589
Sdhc	succinate dehydrogenase complex, subunit C, integral membrane protein	chr13:94125547-94146440	426.328	310.876	567.269	-0.455624	0.412068	-0.867692	0.0811477	0.174902	0.000653095	364.896	321.593	396.797	431.701	616.654	338.498	235.792	322.814	365.322	291.956	608.754	489.03	718.194	453.098
Id4	inhibitor of DNA binding 4	chr17:18744510-18747080	194.745	310.671	203.815	0.673801	0.0656743	0.608127	0.00441716	0.8824	0.0195196	258.292	154.069	195.095	215.032	151.239	424.461	381.237	199.775	275.055	272.828	205.503	216.868	184.713	208.177
Aoc3	amine oxidase, copper containing 3	chr10:89049332-89057275	614.168	309.168	423.21	-0.990242	-0.53726	-0.452981	0.000653095	0.155658	0.1929	682.17	602.819	660.737	568.95	556.165	328.045	283.446	343.484	299.54	291.326	465.303	340.15	409.208	478.179
Slc25a4	solute carrier family 25 (mitochondrial carrier; adenine nucleotide translocator), member 4	chr16:48981599-48985395	406.682	307.225	361.773	-0.404607	-0.168819	-0.235787	0.123639	0.653362	0.478088	417.396	425.537	375.004	399.554	415.922	338.475	326.94	313.876	263.583	293.251	414.156	343.838	345.982	343.114
Smtn	smoothelin	chr14:84443088-84464810	351.518	306.047	290.578	-0.199843	-0.274672	0.0748295	0.62314	0.490849	0.890663	366.016	324.223	294.015	468.909	304.425	348.833	374.041	276.991	189.139	341.232	266.911	222.281	265.366	407.753
Serinc3	serine incorporator 3	chr3:166209486-166228921	202.768	304.944	235.547	0.588719	0.216187	0.372532	0.0229153	0.531259	0.223888	233.282	215.332	204.272	202.264	158.688	301.917	416.619	291.298	225.948	288.942	203.564	246.929	229.606	262.088
Rpl3	ribosomal protein L3	chr7:121287082-121292461	334.436	304.194	342.15	-0.136737	0.0328999	-0.169637	0.70531	0.94582	0.643657	330.599	363.597	328.618	314.204	335.161	285.35	304.448	286.294	342.108	302.77	378.646	330.157	332.896	326.902
Vamp2	vesicle-associated membrane protein 2	chr10:55418596-55422465	490.001	303.64	412.099	-0.690425	-0.249793	-0.440633	0.00715047	0.511332	0.147253	516.605	546.199	541.619	492.316	353.266	377.402	316.225	274.689	236.386	313.496	457.803	341.186	392.571	456.837
Wbp5	WW domain binding protein 5	chrX:106336501-106338637	347.392	303.507	322.074	-0.194837	-0.109175	-0.0856625	0.543766	0.783753	0.83871	376.626	346.431	314.118	346.306	353.48	323.221	310.836	278.548	353.015	251.913	323.712	280.311	342.533	341.737
Skp1	S-phase kinase-associated protein 1	chr10:37368050-37382971	461.688	303.265	430.681	-0.606337	-0.100297	-0.50604	0.0063956	0.815234	0.0543767	475.755	421.739	425.757	464.518	520.669	317.956	276.127	325.181	298.465	298.598	493.277	401.028	423.388	405.032
Mrfap1	Morf4 family associated protein 1	chr14:87168541-87170317	439.946	301.753	410.607	-0.543956	-0.0995681	-0.444388	0.0314141	0.827124	0.113885	440.061	450.748	436.23	429.939	442.753	331.596	286.789	305.609	290.749	294.023	500.596	388.137	338.868	414.827
Igfbp4	insulin-like growth factor binding protein 4	chr10:86747475-86759484	353.709	300.815	254.092	-0.233687	-0.477212	0.243525	0.494829	0.098863	0.503285	379.207	364.539	373.859	291.698	359.244	331.804	209.38	415.029	316.034	231.829	331.532	184.824	234.432	265.581
RGD1559896	similar to RIKEN cDNA 2310022B05	chr19:68101909-68127030	306.718	300.804	281.565	-0.0280905	-0.123445	0.0953548	0.957934	0.787351	0.847267	359.08	276.815	314.97	333.3	249.427	343.365	399.904	279.486	197.34	283.925	293.228	208.611	260.288	364.134
Txnip	thioredoxin interacting protein	chr2:218170101-218173902	345.437	299.541	330.925	-0.205669	-0.0619167	-0.143752	0.606484	0.907988	0.760629	433.056	342.152	334.296	256.314	361.367	213.3	316.62	225.372	523.313	219.1	403.106	254.398	285.456	380.741
Comp	cartilage oligomeric matrix protein	chr16:20649298-20657932	20.4045	299.429	32.5708	3.87526	0.674696	3.20056	0.000653095	0.00173202	0.000653095	19.0572	15.326	22.4929	29.4428	15.7033	373.767	241.512	235.033	203.22	443.615	36.7505	41.902	18.1326	33.498
Fblim1	filamin binding LIM protein 1	chr5:163841376-163867441	611.243	294.956	412.331	-1.05125	-0.567945	-0.483302	0.000653095	0.0518797	0.089625	747.368	599.049	499.261	669.162	541.377	376.52	227.348	325.409	217.759	327.744	415.275	332.058	322.978	579.012
Shfm1	split hand/foot malformation (ectrodactyly) type 1	chr4:31935395-31955552	418.659	293.13	405.858	-0.514234	-0.0448017	-0.469432	0.0226298	0.923394	0.0621878	412.351	428.338	404.71	464.332	383.563	344.991	269.04	298.586	251.889	301.145	489.128	375.021	359.173	400.107
Vcam1	vascular cell adhesion molecule 1	chr2:237158200-237177689	79.7121	292.954	183.874	1.8778	1.20584	0.67196	0.000653095	0.000653095	0.0760834	69.164	93.6828	94.5457	64.8528	76.3153	328.701	104.287	333.212	272.172	426.398	112.197	447.616	75.2898	100.392
Pck1	phosphoenolpyruvate carboxykinase 1 (soluble)	chr3:177278782-177284732	185.483	292.008	507.518	0.654726	1.45218	-0.797449	0.112965	0.000653095	0.0614287	154.482	93.5274	142.244	118.971	418.188	199.264	86.7045	170.777	823.764	179.532	577.063	419.731	745.104	288.174
Snrnp70	small nuclear ribonucleoprotein 70 (U1)	chr1:102437189-102468582	321.974	289.528	267.52	-0.15324	-0.267296	0.114056	0.669254	0.411137	0.779465	252.517	353.479	281.224	405.962	316.686	297.586	332.821	218.095	294.467	304.671	260.926	194.405	278.807	335.941
Emp3	epithelial membrane protein 3	chr1:102979696-102982874	230.03	289.048	188.384	0.32949	-0.288142	0.617632	0.213057	0.319254	0.00934149	279.684	234.966	213.954	277.61	143.934	423.794	260.702	261.347	155.288	344.111	202.402	258.025	120.956	172.154
Ptrf	polymerase I and transcript release factor	chr10:88659594-88671569	326.198	288.516	350.525	-0.177097	0.10377	-0.280867	0.602989	0.812805	0.394529	280.365	318.09	308.345	340.574	383.615	239.959	321.925	301.694	298.402	280.601	292.973	243.473	358.344	507.31
Ubxn1	UBX domain protein 1	chr1:232005790-232009471	306.807	288.162	335.895	-0.0904494	0.130681	-0.22113	0.808804	0.730266	0.491615	313.99	297.732	270.556	327.477	324.278	271.7	305.309	289.51	309.262	265.028	354.029	306.726	327.667	355.159
Rpl23	ribosomal protein L23	chr10:85510908-85514870	266.11	285.784	295.014	0.1029	0.148762	-0.0458616	0.765769	0.667269	0.914323	292.758	293.894	237.991	209.613	296.294	299.249	246.099	263.178	350.474	269.918	309.282	295.743	313.803	261.23
Cryab	crystallin, alpha B	chr8:53776099-53779778	460.343	285.12	455.994	-0.69114	-0.0136942	-0.677446	0.00173202	0.97835	0.00601445	342.352	544.03	778.609	396.162	240.565	334.608	292.109	238.024	187.645	373.215	429.243	319.52	571.771	503.444
Lum	lumican	chr7:38861406-38868211	258.854	284.056	179.045	0.13404	-0.531815	0.665855	0.730266	0.0463165	0.00715047	266.52	337.971	326.054	132.937	230.786	257.14	236.348	388.259	252.993	285.541	157.74	192.653	167.378	198.409
Plod2	procollagen lysine, 2-oxoglutarate 5-dioxygenase 2	chr8:99462924-99545577	164.061	281.769	172.405	0.780281	0.0715706	0.708711	0.00267407	0.88068	0.0120346	131.543	184.914	199.918	181.174	122.755	339.127	263.642	297.291	185.795	322.99	166.85	205.786	141.915	175.068
Arf5	ADP-ribosylation factor 5	chr4:55463190-55466117	516.971	281.026	338.486	-0.87938	-0.610988	-0.268392	0.000653095	0.0186805	0.419771	543.704	502.453	529.405	634.044	375.246	432.179	263.966	280.729	184.593	243.661	465.668	386.863	192.781	308.63
Grb14	growth factor receptor bound protein 14	chr3:57578227-57695025	417.256	279.116	377.633	-0.580066	-0.143946	-0.43612	0.0251429	0.748469	0.161533	397.341	600.571	426.867	324.762	336.738	372.794	273.406	277.675	171.485	300.221	523.027	336.206	249.672	401.627
Ppib	peptidylprolyl isomerase B	chr8:71388619-71394477	276.357	277.011	262.397	0.00341337	-0.0747795	0.0781929	0.995097	0.857992	0.847753	298.991	248.498	276.61	288.328	269.358	306.495	229.205	327.186	226.014	296.157	279.121	290.482	234.319	245.666
Lmna	lamin A/C	chr2:207245238-207265869	315.168	274.872	286.867	-0.197359	-0.135738	-0.061621	0.606304	0.764677	0.904644	302.54	326.697	314.217	364.15	268.233	366.083	236.724	272.666	179.588	319.299	308.372	275.37	221.032	342.693
Cox17	COX17 cytochrome c oxidase copper chaperone	chr11:67113607-67119381	373.222	272.835	472.771	-0.452006	0.341108	-0.793114	0.0531198	0.213407	0.000653095	367.426	338.994	304.475	357.72	497.495	238.843	237.469	259.741	381.234	246.887	525.98	452.71	569.716	342.678
Zfp36l1	zinc finger protein 36, C3H type-like 1	chr6:115987359-115992381	262.618	272.833	203.395	0.0550542	-0.368681	0.423735	0.905445	0.230104	0.155543	224.518	248.053	262.066	250.015	328.436	281.167	326.975	264.129	276.611	215.282	207.691	206.124	180.758	219.006
Zyx	zyxin	chr4:136544929-136568077	430.67	272.526	325.226	-0.660188	-0.405142	-0.255047	0.0157481	0.218458	0.493719	416.798	474.922	452.889	476.087	332.657	298.328	378.746	217.906	190.819	276.833	317.302	276.943	336.15	370.509
Pls3	plastin 3	chrX:119173342-119266236	300.912	272.232	320.113	-0.144504	0.0892387	-0.233743	0.725683	0.854392	0.546223	323.519	306.432	318.437	275.229	280.944	267.413	318.213	277.23	214.148	284.158	334.232	296.239	301.141	348.84
Rpl41	ribosomal protein L41	chr7:2946525-2947605	353.385	272.016	303.944	-0.377547	-0.217434	-0.160113	0.107941	0.480422	0.633177	353.314	366.625	396.874	370.563	279.549	311.675	303.501	238.671	221.065	285.171	372.072	338.374	246.438	258.893
Tgfb3	transforming growth factor, beta 3	chr6:119222051-119243828	360.059	271.293	345.454	-0.408381	-0.0597399	-0.348641	0.197605	0.904931	0.327333	305.644	440.244	436.12	342.931	275.355	316.903	449.295	232.962	140.999	216.305	378.744	298.674	353.844	350.551
Atf5	activating transcription factor 5	chr1:101873009-101875285	446.854	270.28	339.323	-0.72535	-0.397144	-0.328207	0.000653095	0.160712	0.259816	357.909	506.719	483.196	396.992	489.456	306.721	264.18	296.478	198.78	285.241	348.682	243.356	356.982	408.273
Hnrph1	NA	chr10:35644078-35651370	373.39	269.2	361.901	-0.472003	-0.0450877	-0.426916	0.075423	0.927289	0.14566	345.583	380.247	343.294	412.612	385.213	275.759	272.507	260.658	267.69	269.387	405.18	334.661	297.108	410.655
Cfl1	cofilin 1, non-muscle	chr1:227799125-227802658	305.274	266.11	271.929	-0.198081	-0.166875	-0.0312066	0.532975	0.643694	0.949145	390.146	262.701	336.592	308.837	228.094	336.37	288.728	270.605	176.574	258.275	285.068	321.297	223.747	257.604
Cdo1	cysteine dioxygenase type 1	chr18:40348060-40362704	169.628	265.921	231.061	0.648624	0.445899	0.202725	0.0392475	0.0926329	0.644919	184.038	159.904	182.809	106.823	214.565	138.507	217.031	149.155	701.982	122.929	258.716	233.769	251.062	180.696
Akr1a1	aldo-keto reductase family 1, member A1 (aldehyde reductase)	chr5:139278241-139294867	307.492	265.84	306.509	-0.20999	-0.00462058	-0.20537	0.496653	0.993575	0.544279	331.176	298.936	292.475	328.722	286.152	293.143	246.792	285.51	212.69	291.066	298.287	315.438	311.159	301.152
Arhgdia	Rho GDP dissociation inhibitor (GDI) alpha	chr10:109347155-109350645	263.127	265.327	252.877	0.0120135	-0.05732	0.0693335	0.979315	0.897442	0.879453	287.089	250.103	275.629	281.283	221.529	312.978	265.067	284.131	187.19	277.27	240.138	278.67	227.754	264.947
Pdap1	PDGFA associated protein 1	chr12:12819937-13740743	274.755	262.871	280.027	-0.0637932	0.0274212	-0.0912144	0.940999	0.975866	0.918668	281.641	246.72	259.021	283.107	303.287	273.762	284.811	244.896	263.992	246.893	292.117	258.071	256.703	313.219
Lyz2	lysozyme 2	chr7:60337949-60343246	33.6217	262.53	27.7567	2.96502	-0.276556	3.24158	0.000653095	0.405968	0.000653095	35.5645	27.0813	58.8309	16.6591	29.9725	268.642	253.619	329.54	196.498	264.352	23.6428	44.4318	29.6558	13.2964
Npc2	Niemann-Pick disease, type C2	chr6:117060859-117081780	206.324	262.046	211.911	0.344907	0.0385447	0.306362	0.190861	0.932261	0.296092	207.202	188.734	215.886	173.767	246.031	288.919	240.172	309.883	228.469	242.784	241.829	214.492	201.567	189.755
Calu	calumenin	chr4:56392771-56420273	222.352	261.505	250.301	0.233994	0.170819	0.0631751	0.498969	0.67309	0.900728	250.49	215.553	215.333	215.652	214.73	284.66	233.656	307.087	204.675	277.445	209.122	284.361	243.952	263.767
Gpx1	glutathione peroxidase 1	chr8:116466117-116467216	247.66	261.119	254.344	0.0763462	0.0384224	0.0379238	0.842875	0.927988	0.931956	256.4	219.414	260.634	301.939	199.912	349.862	242.069	240.836	172.624	300.203	278.393	267.809	231.031	240.144
Chmp3	charged multivesicular body protein 3	chr4:164228515-164273966	256.227	260.18	289.17	0.0220881	0.174496	-0.152408	0.959831	0.608765	0.666266	235.851	250.968	262.192	227.088	305.037	283.468	238.434	255.616	279.822	243.561	307.677	284.245	281.768	282.991
Rps16	ribosomal protein S16	chr1:86620607-86623553	391.867	259.586	339.24	-0.594151	-0.208055	-0.386097	0.00752383	0.518887	0.145388	400.598	388.467	409.598	395.689	364.98	286.725	290.313	242.204	209.328	269.358	385.991	310.144	321.483	339.344
Itgbl1	integrin, beta-like 1	chr15:113495870-113759208	229.538	257.363	220.765	0.16507	-0.0562206	0.22129	0.651507	0.904345	0.531633	233.504	233.661	247.401	183.761	249.364	237.72	298.195	301.669	223.146	226.086	245.377	163.091	217.751	256.843
Pfn1	profilin 1	chr10:57018596-57021302	318.291	257.329	296.888	-0.306734	-0.100429	-0.206305	0.252791	0.798752	0.525218	407.67	288.261	308.014	355.208	232.304	286.627	267.435	294.036	190.788	247.759	295.584	353.455	258.769	279.744
Myadm	myeloid-associated differentiation marker	chr1:63430411-63438759	365.131	256.79	295.648	-0.507824	-0.304535	-0.203289	0.0707988	0.410235	0.609353	453.39	406.945	386.154	361.884	217.283	290.472	324.513	239.91	168.564	260.493	297.882	294.281	271.597	318.831
Pabpn1	poly(A) binding protein, nuclear 1	chr15:37442585-37447197	311.008	256.67	238.191	-0.277039	-0.384832	0.107793	0.383286	0.187547	0.795313	292.308	302.111	290.419	388.879	281.323	364.251	257.364	212.381	217.564	231.788	287.885	236.502	193.671	234.706
Hnrpd	heterogeneous nuclear ribonucleoprotein D	chr14:11200290-11218603	316.188	253.893	320.571	-0.316563	0.0198584	-0.336422	0.264546	0.969858	0.268606	295.324	315.752	315.252	318.236	336.378	238.382	273.893	213.207	310.427	233.557	332.439	318.551	321.153	310.14
Anxa5	annexin A5	chr2:142777642-142808315	339.498	253.871	304.661	-0.419306	-0.156197	-0.263109	0.0980558	0.680708	0.411958	361.492	333.682	359.429	351.982	290.903	272.213	223.285	293.379	196.706	283.772	323.552	275.482	308.306	311.304
Hcfc1r1	host cell factor C1 regulator 1 (XPO1-dependent)	chr10:12812179-12818719	338.264	253.764	273.535	-0.414661	-0.306424	-0.108237	0.0880855	0.296801	0.78697	334.092	340.252	350.365	388.119	278.491	302.67	259.043	228.314	192.481	286.311	298.164	226.274	271.987	297.714
Prkcdbp	protein kinase C, delta binding protein	chr1:177323466-177325056	390.611	253.625	293.876	-0.623033	-0.410525	-0.212508	0.00601445	0.133395	0.527398	416.791	409.864	400.311	427.04	299.049	309.205	309.923	229.287	166.026	253.687	327.487	277.914	246.287	323.816
Pnn	pinin, desmosome associated protein	chr6:89685235-89693549	230.253	253.274	231.409	0.137478	0.00722005	0.130258	0.729467	0.989373	0.763208	183.361	227.449	198.023	272.736	269.698	246.347	278.225	225.664	278.686	237.449	255.001	199.695	199.801	271.138
Rala	v-ral simian leukemia viral oncogene homolog A (ras related)	chr17:47770965-47784077	162.097	252.232	199.193	0.637888	0.297306	0.340582	0.000653095	0.273343	0.207557	156.857	153.502	170.726	169.819	159.583	325.807	243.525	227.475	206.001	258.35	225.584	201.459	176.77	192.96
Ywhah	tyrosine 3-monooxygenase/tryptophan 5-monooxygenase activation protein, eta polypeptide	chr14:83739008-83748391	315.907	251.911	318.753	-0.326589	0.0129373	-0.339526	0.256528	0.980139	0.267657	392.599	301.815	349.262	321.138	214.721	309.9	251.829	237.247	176.656	283.921	299.511	341.832	317.605	316.063
Cnbp	CCHC-type zinc finger, nucleic acid binding protein	chr4:184999245-185008099	364.306	251.773	324.002	-0.533027	-0.169147	-0.363879	0.0353991	0.659888	0.213814	389.784	377.986	397.202	339.679	316.878	295.412	235.428	229.871	264.669	233.484	385.965	338.979	286.554	284.509
Rpl14	ribosomal protein L14	chr8:128438420-128441293	337.545	251.66	295.592	-0.423606	-0.191474	-0.232132	0.0730019	0.559816	0.445848	337.904	334.137	348.542	328.22	338.923	264.94	276.166	260.159	226.329	230.706	390.129	255.319	257.687	279.232
Pabpc1	poly(A) binding protein, cytoplasmic 1	chr7:75557633-75569927	169.525	249.131	203.58	0.555409	0.2641	0.29131	0.0223303	0.411763	0.37651	160.467	173.016	181.009	145.762	187.369	179.271	309.829	232.935	315.431	208.189	176.237	232.629	217.444	188.008
Rpsa	ribosomal protein SA	chr8:128006813-128010671	346.613	247.964	282.134	-0.483194	-0.296946	-0.186248	0.043336	0.31873	0.580628	295.78	345.475	377.987	409.262	304.559	294.762	251.287	205.01	230.251	258.51	317.118	275.306	286.58	249.53
Clk1	CDC-like kinase 1	chr9:65104067-65115289	245.298	247.004	237.228	0.00999829	-0.0482568	0.0582551	0.982531	0.9171	0.897282	230.341	264.1	259.019	291.622	181.406	227.593	305.039	224.983	248.593	228.809	237.748	252.056	261.048	198.062
Casq2	calsequestrin 2 (cardiac muscle)	chr2:223945610-224001893	267.629	246.097	307.324	-0.12101	0.199526	-0.320536	0.765499	0.600543	0.344089	270.133	229.537	267.987	320.858	249.631	305.392	297.555	274.923	141.878	210.736	340.76	277.445	279.966	331.126
Atp6v0c	ATPase, H+ transporting, lysosomal V0 subunit C	chr10:13352992-13358037	252.981	242.517	234.426	-0.060941	-0.109898	0.0489566	0.880447	0.776059	0.912551	238.891	251.93	276.441	277.724	219.918	256.301	263.136	234.237	193.515	265.398	241.056	227.372	249.139	220.136
Plin1	perilipin 1	chr1:142420360-142431601	234.054	241.857	456.598	0.0473149	0.964084	-0.916769	0.936689	0.000653095	0.0110649	156.549	143.186	212.297	181.277	476.96	171.299	67.7826	202.952	617.317	149.936	508.711	422.616	614.399	280.668
Npm1	nucleophosmin (nucleolar phosphoprotein B23, numatrin)	chr10:17965976-17975978	233.919	241.839	249.436	0.0480431	0.0926651	-0.0446219	0.910907	0.819731	0.923876	201.074	255.164	235.084	214.6	263.672	240.217	242.935	219.055	309.544	197.446	288.038	250.309	228.662	230.736
Rras	related RAS viral (r-ras) oncogene homolog	chr1:102077774-102081673	218.629	241.505	190.046	0.143572	-0.202138	0.34571	0.673142	0.528351	0.208798	266.764	193.49	208.637	259.905	164.348	330.227	279.65	222.565	156.115	218.97	199.58	213.699	161.456	185.448
Mmp2	matrix metallopeptidase 2	chr19:26629727-26658966	230.845	240.192	151.793	0.0572638	-0.604814	0.662078	0.901769	0.0201426	0.0129683	230.034	253.639	270.357	200.103	200.091	274.324	213.218	292.442	155.868	265.108	151.039	133.398	157.2	165.537
Anxa1	annexin A1	chr1:245192874-245208894	215.023	239.633	200.522	0.156331	-0.10073	0.257061	0.642439	0.797768	0.410235	261.462	240.95	225.436	183.607	163.663	244.789	288.125	222.965	196.743	245.542	197.732	202.065	172.966	229.326
Ik	IK cytokine, down-regulator of HLA II	chr18:29291707-29306512	225.818	237.13	231.55	0.0705161	0.0361654	0.0343507	0.866006	0.938578	0.943251	215.916	236.232	193.41	239.352	244.181	250.498	258.226	205.742	253.917	217.265	231.855	200.87	226.565	266.911
Jund	jun D proto-oncogene	chr16:20342095-20343931	873.818	236.24	439.495	-1.88708	-0.991485	-0.895596	0.000653095	0.000653095	0.00121133	794.17	1085.94	941.533	884.223	663.219	320.354	201.302	224.45	182.826	252.267	541.086	395.131	440.31	381.454
Trmt112	tRNA methyltransferase 11-2 homolog (S. cerevisiae)	chr1:229158780-229169579	264.595	235.159	261.314	-0.170148	-0.0179997	-0.152148	0.631468	0.972734	0.703674	265.781	220.947	231.597	274.225	330.425	245.465	192.32	219.762	263.119	255.13	274.063	235.509	271.52	264.164
Camk2n1	calcium/calmodulin-dependent protein kinase II inhibitor 1	chr5:160625615-160627396	338.746	235.15	274.54	-0.526623	-0.303188	-0.223435	0.0151083	0.279088	0.465566	288.748	362.911	294.52	309.392	438.159	183.011	322.306	243.698	239.525	187.21	366.267	192.901	228.272	310.719
Psmd7	proteasome (prosome, macropain) 26S subunit, non-ATPase, 7	chr19:50501207-50508494	217.142	233.986	221.503	0.107787	0.0286903	0.0790962	0.778527	0.950234	0.853531	192.365	203.899	179.817	260.993	248.635	269.875	214.914	208.466	222.945	253.731	218.932	219.937	219.774	227.369
Atp6v1g1	ATPase, H transporting, lysosomal V1 subunit G1	chr5:83481866-83488047	251.935	233.866	248.537	-0.107371	-0.019592	-0.0877792	0.760969	0.96719	0.828243	249.668	252.207	263.641	239.34	254.822	252.812	249.246	215.734	237.161	214.378	275.118	240.09	226.066	252.875
Pnisr	PNN-interacting serine/arginine-rich protein	chr5:40646029-40672914	244.902	231.009	227.745	-0.0842573	-0.104783	0.020526	0.854953	0.827404	0.971442	223.652	234.782	210.547	290.795	264.733	252.346	249.286	199.24	246.085	208.085	281.038	189.412	170.949	269.582
Rcan1	regulator of calcineurin 1	chr11:36145268-36155595	131.988	230.144	253.154	0.802132	0.939611	-0.137479	0.000653095	0.000653095	0.745276	86.7964	142.779	193.405	101.447	135.512	279.745	269.45	177.027	136.701	287.797	352.575	156	241.901	262.141
Tns1	tensin 1	chr9:80960129-81166699	192.642	228.856	221.174	0.248514	0.199255	0.0492588	0.527832	0.673385	0.936922	169.402	178.45	177.285	233.123	204.951	181.543	344.958	172.627	199.497	245.654	179.021	123.292	232.559	349.822
LOC100360619	ribosomal protein L28-like	chr19:49511026-49511421	194.855	227.308	152.422	0.222252	-0.354326	0.576578	0.43601	0.194536	0.0142233	112.683	189.508	240.734	228.303	203.044	248.175	205.454	187.194	248.789	246.93	142.16	121.436	178.251	167.841
Srsf11	serine/arginine-rich splicing factor 11	chr2:283477392-283496845	246.042	227.028	218.435	-0.116039	-0.171704	0.0556658	0.774655	0.661682	0.904838	200.242	255.115	206.722	314.577	253.557	255.922	245.266	186.652	225.012	222.288	245.726	202.645	179.512	245.856
Serbp1	Serpine1 mRNA binding protein 1	chr4:162813223-162830068	200.651	226.931	233.013	0.177569	0.215725	-0.0381564	0.579755	0.503446	0.935427	212.309	205.398	188.872	187.734	208.94	207.939	229.767	223.172	263.253	210.526	258.085	245.226	220.702	208.041
Set	SET nuclear oncogene	chr19:69119721-69121240	230.668	226.883	249.595	-0.0238709	0.113769	-0.13764	0.955328	0.776267	0.720648	213.627	214.192	200.939	233.082	291.501	221.745	202.582	239.88	248.837	221.37	258.537	249.88	214.473	275.489
Mxra8	matrix-remodelling associated 8	chr5:176764183-176768534	178.227	226.482	148.037	0.345685	-0.267761	0.613446	0.220916	0.399813	0.0129683	160.646	182.668	193.193	195.96	158.667	272.601	227.678	233.714	158.201	240.219	140.379	155.692	132.862	163.213
RGD1310313	similar to RIKEN cDNA 1110001M20	chr5:130632420-130653537	267.641	224.983	235.116	-0.250483	-0.18693	-0.0635534	0.403451	0.593327	0.885616	246.439	247.705	270.334	295.023	278.705	255.835	240.777	203.782	215.077	209.445	279.636	243.276	199.844	217.706
Sec62	SEC62 homolog (S. cerevisiae)	chr2:135885422-135920134	206.171	224.969	208.628	0.125887	0.0170903	0.108796	0.733362	0.971476	0.78801	201.311	205.28	190.623	200.759	232.881	236.977	200.659	240.788	246.422	200	212.174	193.155	199.27	229.912
Clic1	chloride intracellular channel 1	chr20:7113248-7122093	147.07	224.893	159.647	0.61273	0.118381	0.494349	0.00441716	0.757952	0.0591337	158.765	146.152	139.487	149.694	141.254	303.859	211.551	235.392	156.009	217.652	173.965	224.123	101.752	138.749
Tpm3	tropomyosin 3	chr2:208863080-208884071	125.612	224.743	142.459	0.839304	0.181576	0.657727	0.000653095	0.602583	0.0063956	127.944	128.973	139.886	126.162	105.095	231.567	258.472	214.779	184.073	234.825	125.266	194.886	116.941	132.744
Aldoa	aldolase A, fructose-bisphosphate	chr1:205208254-205213461	237.318	224.044	371.957	-0.0830394	0.648312	-0.731351	0.837993	0.0107371	0.00441716	226.725	206.948	216.971	229.973	305.975	196.634	156.289	199.012	339.577	228.71	342.884	338	546.966	259.977
Cfh	complement factor H	chr13:61997443-62094826	227.039	223.465	259.816	-0.022887	0.194552	-0.217439	0.963638	0.64285	0.59122	250.681	244.768	242.216	195.349	202.178	225.849	221.021	241.521	189.432	239.502	272.354	221.634	250.073	295.202
Bcam	basal cell adhesion molecule (Lutheran blood group)	chr1:81939820-81954480	173.034	221.135	226.58	0.353873	0.388967	-0.0350941	0.218276	0.185495	0.94488	170.426	152.391	157.259	239.426	145.668	287.904	239.122	245.339	122.105	211.206	231.889	240.436	198.202	235.795
Actg2	actin, gamma 2, smooth muscle, enteric	chr4:179805781-179820306	274.692	220.7	207.143	-0.315732	-0.407185	0.091454	0.318564	0.142492	0.83485	399.204	213.205	237.601	338.44	185.01	292.154	434.477	144.411	101.88	130.576	183.729	191.721	225.366	227.756
Cd81	Cd81 molecule	chr1:223099327-223114942	296.036	219.521	230.855	-0.431415	-0.358787	-0.0726281	0.0826826	0.208164	0.864113	313.466	338.554	332.306	275.995	219.858	264.839	178.746	259.113	156.147	238.758	225.732	261.729	204.046	231.911
Sod1	superoxide dismutase 1, soluble	chr11:33982763-33988340	229.778	219.402	300.312	-0.0666685	0.386221	-0.45289	0.861184	0.142492	0.0664453	208.749	225.464	226.668	194.001	294.009	193.62	225.822	213.171	254.334	210.06	307.289	292.346	339.711	261.904
Cnn3	calponin 3, acidic	chr2:243044079-243075190	223.764	219.297	239.472	-0.0290958	0.0978774	-0.126973	0.951007	0.819092	0.760118	231.995	241.467	240.082	242.261	163.016	226.878	313.901	190.222	133.668	231.815	238.179	251.375	251.214	217.12
Shisa4	shisa family member 4	chr13:57244748-57248270	379.629	219.137	302.872	-0.792753	-0.325881	-0.466873	0.000653095	0.244952	0.068364	394.614	382.205	380.539	440.911	299.874	319.355	181.079	233.818	123.007	238.427	329.938	217.861	219.134	444.555
Dad1	defender against cell death 1	chr15:36679087-36699062	221.332	218.093	210.261	-0.0212671	-0.0740312	0.0527642	0.960358	0.852676	0.897282	254.746	185.193	223.371	262.786	180.566	246.867	213.674	234.429	182.881	212.616	231.266	232.778	195.773	181.227
Csrp2	cysteine and glycine-rich protein 2	chr7:53641860-53660495	339.661	217.134	329.899	-0.645509	-0.0420728	-0.603436	0.00601445	0.92572	0.0126641	493.837	261.388	300.732	381.668	260.679	246.067	343.782	182.244	148.359	165.218	350.001	320.335	307.493	341.765
Rab7a	RAB7A, member RAS oncogene family	chr4:185158349-185205835	229.834	216.506	260.123	-0.0861877	0.178601	-0.264789	0.829206	0.631675	0.432871	231.104	204.91	216.951	233.983	262.223	197.355	224.087	225.592	180.091	255.403	222.82	198.795	304.775	314.102
Hnrpdl	NA	chr14:11143238-11146507	257.436	215.752	273.616	-0.25484	0.0879388	-0.342779	0.387659	0.832748	0.228	262.893	280.382	258.696	268.424	216.784	209.747	246.175	190.032	235.919	196.886	257.319	292.511	267.592	277.041
S100a10	S100 calcium binding protein A10	chr2:210966301-210974949	179.32	215.033	134.24	0.262022	-0.417717	0.679738	0.324143	0.102298	0.00313022	192.322	196.74	203.524	152.357	151.657	252.937	172.896	221.286	162.659	265.388	138.909	195.62	100.866	101.566
Fos	FBJ osteosarcoma oncogene	chr6:116249741-116252608	220.767	214.986	77.943	-0.0382818	-1.50203	1.46375	0.941667	0.000653095	0.000653095	466.49	70.157	221.987	226.976	118.226	229.526	69.4724	311.577	240.102	224.254	99.7097	115.955	53.0048	43.1031
Rpl11	ribosomal protein L11	chr5:158155381-158158591	271.744	214.41	231.527	-0.341879	-0.231072	-0.110807	0.171558	0.456386	0.769533	294.45	297.263	284.14	239.171	243.698	230.993	204.635	218.704	203.42	214.297	274.859	226.482	211.319	213.446
Snx3	sorting nexin 3	chr20:48923087-48932814	285.119	214.134	294.666	-0.413047	0.0475176	-0.460565	0.0793802	0.915513	0.0668596	286.167	269.802	296.6	284.794	288.23	222.041	206.087	235.629	204.971	201.942	312.604	294.22	281.71	290.129
Ctsd	cathepsin D	chr1:222436921-222448798	170.33	214.091	222.851	0.32989	0.387747	-0.0578572	0.239552	0.18096	0.902371	160.801	150.039	179.033	155.837	205.941	227.825	192.322	237.744	187.643	224.92	220.474	209.458	283.13	178.345
Leng8	leukocyte receptor cluster (LRC) member 8	chr1:74814348-74826049	272.918	214.09	195.908	-0.350253	-0.478294	0.12804	0.332829	0.171116	0.789716	246.139	262.716	265.196	372.167	218.374	268.914	260.118	167.875	170.987	202.556	239.259	184.708	151.811	207.853
Ywhaz	tyrosine 3-monooxygenase/tryptophan 5-monooxygenase activation protein, zeta polypeptide	chr7:75721098-75743409	254.59	213.47	261.632	-0.254144	0.039364	-0.293508	0.392533	0.932496	0.341046	281.769	267.438	259.074	219.596	245.072	212.792	207.476	231.761	185.031	230.287	254.342	246.3	257.176	288.71
Ptp4a2	protein tyrosine phosphatase type IVA, member 2	chr5:151774822-151784020	223.496	213.175	247.681	-0.0682114	0.148231	-0.216443	0.859255	0.684668	0.497611	218.83	209.149	242.843	208.831	237.828	206.371	201.996	230.057	205.794	221.658	227.838	231.86	263.673	267.352
Pdlim1	PDZ and LIM domain 1	chr1:266752409-266800840	309.904	212.572	275.671	-0.543869	-0.168875	-0.374994	0.0212459	0.647772	0.179958	333.928	329.353	372.961	290.348	222.931	238.721	227.619	197.346	154.355	244.82	293.664	242.786	281.618	284.616
Paf1	Paf1, RNA polymerase II associated factor, homolog (S. cerevisiae)	chr1:86577750-86583329	191.028	212.311	198.761	0.152392	0.0572504	0.0951412	0.669224	0.900102	0.819048	137.168	189.785	188.811	197.697	241.681	243.293	213.294	210.814	190.782	203.371	241.428	169.501	163.901	220.216
Ndrg2	NDRG family member 2	chr15:32118799-32127439	293.795	211.734	307.186	-0.472556	0.0643045	-0.53686	0.0779462	0.893421	0.0596881	325.967	290.734	245.364	289.729	317.18	175.313	239.575	164.506	325.964	153.312	358.592	279.098	322.432	268.622
Psma7	proteasome (prosome, macropain) subunit, alpha type 7	chr3:181692297-181698641	248.602	211.416	257.151	-0.233754	0.0487786	-0.282533	0.413516	0.907939	0.328047	245.105	275.553	211.417	247.648	263.285	252.56	196.839	208.746	218.78	180.153	278.277	287.162	237.745	225.419
Cap1	CAP, adenylate cyclase-associated protein 1 (yeast)	chr5:144350202-144376518	230.292	211.13	227.265	-0.125335	-0.0190885	-0.106246	0.750601	0.972341	0.805705	253.458	204.974	221.975	254.875	216.178	234.731	260.107	200.261	144.03	216.52	226.411	198.101	222.313	262.234
Lbp	lipopolysaccharide binding protein	chr3:160793300-160819979	68.039	210.766	60.4684	1.63121	-0.170179	1.80139	0.000653095	0.647554	0.000653095	57.0238	99.4912	99.4978	41.0757	43.1062	157.279	365.823	187.067	131.154	212.507	39.2228	107.51	42.6951	52.4457
Raly	RALY heterogeneous nuclear ribonucleoprotein	chr3:156695465-156756850	229.591	210.621	258.982	-0.124417	0.173782	-0.298199	0.720959	0.612623	0.294344	201.289	208.971	209.844	245.926	281.926	217.812	218.695	215.151	189.188	212.259	275.602	241.975	240.351	277.998
Canx	calnexin	chr10:35562607-35595454	184.135	209.427	210.129	0.185685	0.190513	-0.00482742	0.629984	0.646133	0.993924	177.176	177.361	177.105	178.805	210.228	209.437	197.235	222.321	205.35	212.794	199.094	208.987	192.799	239.637
Psme1	proteasome (prosome, macropain) activator subunit 1	chr15:38146265-38153351	214.16	208.879	222.198	-0.0360273	0.0531548	-0.0891821	0.933251	0.904838	0.822464	208.556	208.867	226.52	205.464	221.395	229.691	181.156	192.809	219.062	221.675	201.24	254.008	228.469	205.077
Ndufa1	NADH dehydrogenase (ubiquinone) 1 alpha subcomplex, 1	chrX:124598914-124602556	267.882	208.056	412.535	-0.364623	0.622917	-0.98754	0.128809	0.00484629	0.000653095	273.085	229.24	247.995	236.278	352.814	228.227	150.911	216.561	222.975	221.609	443.71	372.891	491.623	341.914
Ddx17	DEAD (Asp-Glu-Ala-Asp) box helicase 17	chr7:120754841-120758011	205.836	206.055	180.668	0.00153312	-0.188155	0.189688	0.997046	0.579378	0.577224	199.847	195.74	185.046	229.716	218.833	204.738	221.07	180.301	218.213	205.954	185.487	151.109	183.038	203.039
Tgfb1i1	transforming growth factor beta 1 induced transcript 1	chr1:206710119-206716915	349.673	205.477	259.436	-0.76703	-0.430629	-0.336401	0.00121133	0.144557	0.27127	397.225	355.904	364.687	384.734	245.815	255.353	267.456	192.262	110.094	202.22	278.441	225.641	224.175	309.486
Igfbp6	insulin-like growth factor binding protein 6	chr7:141546234-141551042	180.365	205.133	137.692	0.185641	-0.389471	0.575112	0.543302	0.127601	0.0135771	194.781	199.503	192.961	139.689	174.888	191.491	286.969	186.364	179.171	181.67	163.934	77.5928	157.359	151.884
Actn1	actinin, alpha 1	chr6:116056247-116149471	248.997	204.25	228.982	-0.285792	-0.120895	-0.164897	0.394539	0.784844	0.695603	293.928	224.374	246.483	297.338	182.863	170.489	328.495	167.841	150.493	203.932	216.437	159.595	239.941	299.953
Tmco1	transmembrane and coiled-coil domains 1	chr13:90109016-90202246	171.697	203.046	188.134	0.241944	0.131897	0.110047	0.40996	0.720984	0.77462	189.106	178.243	187.649	126.628	176.858	275.506	159.857	200.148	187.264	192.455	211.433	197.674	159.178	184.251
Aldh2	aldehyde dehydrogenase 2 family (mitochondrial)	chr12:42334121-42365993	326.288	202.765	271.957	-0.68634	-0.262769	-0.423571	0.00267407	0.433654	0.132159	274.465	326.123	323.344	320.492	387.017	190.478	211.636	195.869	208.433	207.408	290.463	192.992	290.302	314.07
Itm2c	integral membrane protein 2C	chr9:92645769-92659607	173.494	202.405	163.876	0.222361	-0.0822814	0.304643	0.469094	0.845125	0.319254	165.66	184.061	181.323	162.06	174.366	239.778	196.37	227.65	142.35	205.878	180.592	143.73	149.489	181.692
Kank1	KN motif and ankyrin repeat domains 1	chr1:250540558-250659565	281.037	201.966	254.071	-0.476648	-0.145527	-0.331121	0.129202	0.773033	0.395204	250.043	311.631	298.288	308.834	236.387	166.82	283.157	156.983	172.059	230.809	228.71	190.997	261.848	334.728
Cidea	cell death-inducing DFFA-like effector a	chr18:62268024-62292643	283.956	201.265	606.499	-0.49657	1.09484	-1.59141	0.0614287	0.000653095	0.000653095	238.903	199.947	261.035	200.346	519.549	124.579	96.3099	186.031	445.194	154.212	630.396	569.651	950.423	275.526
Os9	osteosarcoma amplified 9	chr7:70558016-70584816	153.435	199.852	142.067	0.381298	-0.111058	0.492357	0.150173	0.78263	0.0664453	140.045	152.444	154.042	152.137	168.508	213.253	208.286	211.911	172.458	193.35	150.638	130.701	132.321	154.609
Gdi2	GDP dissociation inhibitor 2	chr17:72003427-72030115	172.339	199.263	180.374	0.209424	0.0657416	0.143683	0.504764	0.881197	0.707481	180.795	159.583	173.816	162.919	184.581	198.076	180.52	200.507	227.084	190.128	194.6	197.144	180.382	149.369
Rhoc	ras homolog family member C	chr2:226691122-226717439	273.997	198.756	233.081	-0.463161	-0.233329	-0.229832	0.0603025	0.478475	0.491615	273.399	267.421	294.692	290.577	243.895	272.221	174.895	194.22	136.278	216.165	276.474	266.167	200.012	189.67
Htra1	HtrA serine peptidase 1	chr1:208532012-208581538	178.677	197.755	171.287	0.146366	-0.0609372	0.207304	0.68378	0.892045	0.552027	183.94	189.101	187.243	171.806	161.292	218.838	141.89	264.912	123.755	239.381	159.546	182.196	168.672	174.732
Rps29	ribosomal protein S29	chr6:100914105-100915482	194.56	196.72	162.774	0.0159306	-0.25734	0.273271	0.972304	0.393033	0.371572	230.276	250.122	159.972	156.676	175.753	288.458	128.43	187.034	180.99	198.688	193.627	140.692	209.711	107.068
Tmed2	transmembrane emp24 domain trafficking protein 2	chr12:39342089-39351124	183.648	195.417	188.645	0.0896144	0.0387378	0.0508766	0.817262	0.93428	0.911652	205.173	183.788	183.035	180.332	165.91	219.663	182.75	203.83	172.375	198.466	182.349	207.58	184.108	180.544
Ndufb7	NADH dehydrogenase (ubiquinone) 1 beta subcomplex, 7	chr19:35680096-35684435	265.201	195.279	376.492	-0.441554	0.50553	-0.947084	0.0550105	0.0448645	0.000653095	235.296	219.259	184.995	307.078	379.379	196.783	147.59	192.913	239.188	199.92	389.43	387.01	499.506	230.021
Pln	phospholamban	chr20:36333902-36441228	95.0602	194.854	124.193	1.03548	0.385667	0.649816	0.000653095	0.170249	0.010049	106.382	90.5813	103.478	98.3931	76.4668	250.201	249.723	181.811	113.064	179.472	136.92	148.762	104.649	106.44
Rpn2	ribophorin II	chr3:158274303-158321446	160.376	194.788	160.73	0.280447	0.00318381	0.277263	0.339227	0.995809	0.386049	168.232	146.059	161.977	164.207	161.405	249.321	153.673	232.297	146.904	191.745	167.556	200.269	128.361	146.735
Calm3	calmodulin 3	chr1:80092077-80099186	313.389	194.248	309.679	-0.690059	-0.0171829	-0.672876	0.000653095	0.972304	0.00401415	327.798	309.485	318.074	270.877	340.713	175.802	182.268	265.146	156.28	191.742	287.07	291.536	275.445	384.665
Hspe1	heat shock protein 1 (chaperonin 10)	chr9:61372461-61375655	318.225	193.822	455.294	-0.715317	0.516752	-1.23207	0.000653095	0.0346397	0.000653095	310.852	315.45	354.812	293.508	316.501	179.947	132.803	205.029	259.703	191.626	552.941	436.439	496.533	335.262
Arglu1	arginine and glutamate rich 1	chr16:86014417-86038237	189.896	192.402	187.624	0.0189123	-0.0173679	0.0362802	0.966075	0.97347	0.936689	153.273	196.376	180.073	215.454	204.306	209.607	205.358	167.865	203.501	175.679	204.869	174.911	156.76	213.957
Rbm3	RNA binding motif (RNP1, RRM) protein 3	chrX:15882064-15885500	237.213	191.862	173.993	-0.306111	-0.447149	0.141039	0.250142	0.0744972	0.694936	267.401	268.447	255.766	219.338	175.112	214.139	221.649	158.154	207.313	158.056	152.525	208.032	165.218	170.197
Lpl	lipoprotein lipase	chr16:22432083-22455884	102.96	191.842	219.052	0.897833	1.08918	-0.191351	0.0231739	0.000653095	0.737911	114.64	68.7038	92.3097	69.3878	169.761	72.7542	107.795	115.042	573.791	89.8301	182.211	232.522	370.042	91.4321
Coro1c	coronin, actin binding protein 1C	chr12:50264709-50337012	347.309	191.433	277.87	-0.859378	-0.32181	-0.537569	0.00173202	0.396631	0.0698594	422.083	273.038	294.391	480.195	266.84	224.539	223.278	186.959	139.254	183.138	316.467	213.326	246.125	335.564
Eif3a	eukaryotic translation initiation factor 3, subunit A	chr1:289478371-289508568	168.784	191.035	203.326	0.178664	0.268622	-0.0899574	0.649803	0.470112	0.853511	141.218	162.1	158.006	176.811	205.783	172.259	203.484	166.617	235.848	176.968	201.088	179.782	214.138	218.298
Luc7l2	LUC7-like 2 (S. cerevisiae)	chr4:66101837-66165880	182.341	190.873	169.461	0.0659728	-0.105691	0.171664	0.876781	0.798542	0.644598	168.699	192.477	169.702	193.388	187.44	195.311	194.774	161.608	235.99	166.683	200.844	155.027	138.753	183.218
Psma4	proteasome (prosome, macropain) subunit, alpha type 4	chr8:58114614-58122075	206.311	190.243	208.086	-0.116974	0.0123654	-0.129339	0.740654	0.979021	0.726035	206.538	193.027	175.955	220.259	235.775	229.447	146.091	197.36	192.989	185.329	232.771	216.291	190.808	192.476
Dynlrb1	dynein light chain roadblock-type 1	chr3:157129662-157150710	238.4	189.75	199.996	-0.329288	-0.253416	-0.0758715	0.174516	0.386278	0.844889	239.123	214.865	261.369	274.721	201.923	231.441	174.188	178.481	173.114	191.525	209.673	200.571	208.234	181.505
Leprel2	leprecan-like 2	chr4:224377006-224390639	184.432	188.644	152.96	0.0325759	-0.26994	0.302515	0.945996	0.395035	0.322438	161.842	163.918	180.116	243.209	173.077	244.069	134.589	226.256	125.716	212.592	168.534	150.618	128.071	164.617
Acadl	acyl-CoA dehydrogenase, long chain	chr9:73434373-73472895	329.225	188.545	635.114	-0.804164	0.947941	-1.75211	0.000653095	0.000653095	0.000653095	286.871	237.938	276.556	263.208	581.553	144.59	113.3	205.685	323.209	155.941	694.668	616.865	892.858	336.065
Kif1c	kinesin family member 1C	chr10:57067763-57097464	166.923	187.806	167.273	0.170059	0.00302066	0.167038	0.65324	0.995809	0.681711	147.655	147.654	144.759	205.06	189.486	207.902	230.522	175.78	136.131	188.693	176.938	160.835	147.78	183.538
Ddx3x	DEAD (Asp-Glu-Ala-Asp) box helicase 3, X-linked	chrX:11198747-11212366	209.13	187.576	217.916	-0.156925	0.0593711	-0.216296	0.693483	0.906699	0.584558	207.988	231.611	216.473	204.539	185.041	185.52	206.956	174.97	192.915	177.521	212.205	240.703	195.081	223.675
Tubb5	tubulin, beta 5 class I	chr20:5519550-5523476	147.905	187.177	161.494	0.339735	0.126806	0.212929	0.209729	0.751375	0.529426	166.17	138.614	143.245	143.179	148.317	193.346	162.23	225.039	163.389	191.883	132.297	210.955	147.9	154.823
Mylk	myosin light chain kinase	chr11:72103709-72313911	272.175	187.095	295.023	-0.540762	0.116296	-0.657058	0.0980558	0.837741	0.0596881	311.524	254.702	252.815	280.595	261.238	177.316	219.526	197.576	150.679	190.379	292.466	231.987	304.256	351.385
Arf4	ADP-ribosylation factor 4	chr16:2313357-2330255	164.44	186.976	180.287	0.185298	0.132735	0.0525631	0.555236	0.72198	0.90476	179.368	163.116	170.051	152.655	157.008	195.019	155.137	211.816	168.318	204.592	144.511	214.878	188.134	173.623
Eid1	EP300 interacting inhibitor of differentiation 1	chr3:124421963-124514515	234.55	186.662	215.702	-0.32947	-0.12086	-0.208609	0.224282	0.758717	0.534465	232.489	225.937	247.77	235.323	231.231	229.324	175.617	204.627	152.834	170.907	228.324	223.196	196.302	214.983
Pkd2	polycystic kidney disease 2 (autosomal dominant)	chr14:6581341-6624595	160.416	186.161	192.969	0.214731	0.266552	-0.0518215	0.552498	0.466956	0.921602	163.386	170.354	170.261	170.602	127.477	167.008	240.902	156.83	147.9	218.164	170.967	194.076	161.098	245.734
Sepp1	selenoprotein P, plasma, 1	chr2:72138103-72170595	218.766	185.047	178.443	-0.241495	-0.293925	0.05243	0.458213	0.364984	0.914751	223.907	241.675	252.051	136.168	240.029	110.409	200.587	208.253	283.215	122.772	207.348	125.962	218.628	161.835
Rpl37a-ps1	ribosomal protein L37a, pseudogene 1	chr9:79774878-79776319	307.678	184.925	290.145	-0.734482	-0.0846453	-0.649836	1	1	1	372.698	320.952	323.313	263.596	257.832	207.094	210.711	191.081	132.423	183.316	340.849	253.371	266.036	300.325
Fmod	fibromodulin	chr13:55928422-55939040	133.649	184.566	102.827	0.465693	-0.378231	0.843924	0.0686732	0.198584	0.000653095	156.557	127.428	145.246	121.31	117.702	162.646	171.69	241.212	165.134	182.15	121.153	48.0421	92.0352	150.077
Rpl34	ribosomal protein L34	chr2:254401915-254405647	290.685	184.228	251.969	-0.657962	-0.206212	-0.451751	0.00121133	0.503285	0.0587023	302.899	340.152	266.247	287.774	256.355	184.742	214.907	194.249	168.731	158.512	297.557	228.763	222.236	259.32
Uqcrh	ubiquinol-cytochrome c reductase hinge protein	chr5:138702774-138710968	235.5	183.86	283.554	-0.357115	0.267898	-0.625012	0.139416	0.349046	0.00715047	207.922	208.763	210.673	247.36	302.78	212.532	145.837	162.505	241.89	156.538	320.737	254.12	332.923	226.435
Acin1	apoptotic chromatin condensation inducer 1	chr15:37173166-37218052	204.784	183.833	168.38	-0.155707	-0.282375	0.126668	0.699115	0.439046	0.774115	166.391	207.837	174.581	262.008	213.101	197.95	196.276	166.403	176.903	181.63	185.57	151.683	144.529	191.739
Rab11b	RAB11B, member RAS oncogene family	chr7:18776590-18789732	260.267	183.721	218.938	-0.50248	-0.249472	-0.253008	0.0356358	0.440211	0.428928	283.402	265.736	277.242	253.246	221.71	200.27	211.58	174.248	152.778	179.727	250.298	185.913	200.58	238.96
Cltb	clathrin, light chain B	chr17:12665187-12682747	186.012	182.587	197.075	-0.0268167	0.0833472	-0.110164	0.94965	0.832491	0.773652	202.144	175.386	173.493	218.21	160.828	204.01	210.418	178.706	143.407	176.392	211.81	179.791	172.543	224.156
Anxa6	annexin A6	chr10:40092955-40148290	281.993	182.296	252.575	-0.629376	-0.158949	-0.470427	0.0120346	0.694406	0.0951053	301.39	271.273	275.152	298.14	264.012	222.527	142.799	216.743	134.508	194.903	263.028	234.215	247.464	265.593
Chmp2a	charged multivesicular body protein 2A	chr1:66352554-66354940	184.836	182.103	186.563	-0.0214913	0.0134166	-0.0349079	0.959213	0.976969	0.934981	158.929	190.892	150.203	204.348	219.807	205.266	138.022	191.017	199.866	176.341	187.519	186.24	202.82	169.672
Wfdc1	WAP four-disulfide core domain 1	chr19:63062103-63080795	355.028	181.866	282.638	-0.965054	-0.328979	-0.636075	0.000653095	0.273652	0.00896933	394.993	288.895	309.697	484.749	296.804	233.972	160.432	224.008	96.9093	194.01	296.122	183.508	282.649	368.271
Gja1	gap junction protein, alpha 1	chr20:39612107-39624552	310.649	181.861	364.349	-0.772447	0.230033	-1.00248	0.00267407	0.590522	0.000653095	261.885	397.53	445.132	273.246	175.454	202.438	169.518	162.667	175.857	198.827	355.068	408.115	406.766	287.445
Chchd10	coiled-coil-helix-coiled-coil-helix domain containing 10	chr20:15820608-15822408	178.292	181.34	421.364	0.0244527	1.24083	-1.21637	0.961788	0.000653095	0.000653095	146.716	133.554	147.308	148.157	315.724	81.8009	70.5516	134.625	503.808	115.913	457.936	413.46	648.407	165.652
LOC287167	globin, alpha	chr10:15472342-15473071	77.5341	181.101	44.1683	1.22389	-0.81182	2.03571	0.000653095	0.0303398	0.000653095	40.1634	5.83952	289.739	8.22211	43.7064	463.566	70.6932	95.2202	242.947	33.0754	74.3893	14.578	44.3321	43.3738
Eif4a2	eukaryotic translation initiation factor 4A2	chr11:84411364-84417958	224.109	179.965	230.405	-0.316484	0.0399739	-0.356458	0.25002	0.931475	0.218171	207.166	246.685	232.81	222.332	211.552	184.63	175.082	172.089	200.838	167.185	257.621	230.558	231.49	201.952
Prpf38b	pre-mRNA processing factor 38B	chr2:231180383-231189409	182.916	179.33	172.705	-0.0285581	-0.0828661	0.054308	0.952253	0.856284	0.907939	147.278	177.759	159.544	228.926	201.071	187.444	172.392	149.149	220.574	167.093	180.887	161.216	152.421	196.297
Tnfrsf11b	tumor necrosis factor receptor superfamily, member 11b	chr7:94436611-94464618	278.901	179.192	218.279	-0.638248	-0.353582	-0.284667	0.0145173	0.297234	0.415565	288.225	344.054	376.043	239.288	146.897	163.704	219.89	133.838	142.901	235.628	198.505	144.012	294.424	236.176
Ndufb10	NADH dehydrogenase (ubiquinone) 1 beta subcomplex, 10	chr10:13905855-13908017	257.122	178.419	318.911	-0.527182	0.310701	-0.837883	0.0163392	0.26747	0.000653095	233.35	223.74	252.254	247.891	328.374	159.016	127.881	191.388	246.826	166.984	309.483	283.855	410.45	271.856
Mustn1	musculoskeletal, embryonic nuclear protein 1	chr16:6889472-6891723	77.4931	175.827	95.7924	1.18201	0.305842	0.876172	0.000653095	0.27122	0.000653095	84.5787	76.398	68.1142	109.205	49.1697	246.087	256.948	148.24	91.7607	136.097	110.753	104.426	67.3618	100.628
Hnrnpu	heterogeneous nuclear ribonucleoprotein U	chr13:100670810-100679599	226.054	175.61	212.937	-0.364296	-0.0862403	-0.278055	0.208798	0.853511	0.415105	209.733	254.278	235.081	214.789	216.39	162.405	183.692	164.472	208.893	158.586	236.197	194.817	196.281	224.454
Anp32e	acidic (leucine-rich) nuclear phosphoprotein 32 family, member E	chr2:217530774-217545155	201.04	174.873	238.638	-0.201174	0.247342	-0.448516	0.504704	0.431034	0.0821165	225.199	195.544	185.12	201.202	198.134	176.783	172.753	166.014	192.608	166.207	261.228	218.129	209.243	265.951
Cox5b	cytochrome c oxidase subunit Vb	chr9:42912213-42914547	241.211	174.533	405.173	-0.466797	0.748242	-1.21504	0.0470175	0.000653095	0.000653095	212.717	193.299	200.459	220.455	379.126	152.505	117.316	188.277	257.568	156.998	415.618	350.413	603.761	250.9
Sdf4	stromal cell derived factor 4	chr5:176901542-176918497	129.753	174.195	144.276	0.424934	0.153061	0.271873	0.0724192	0.659575	0.343901	126.928	122.325	143.874	109.997	145.642	171.536	153.721	212.383	158.408	174.928	140.629	138.507	150.509	147.46
Pdgfa	platelet-derived growth factor alpha polypeptide	chr12:19727671-19748063	75.0179	173.776	63.5462	1.21192	-0.239429	1.45135	0.000653095	0.45398	0.000653095	67.7853	59.6124	61.6405	140.566	45.4857	329.89	113.457	147.908	80.7226	196.904	63.4356	90.8452	30.5909	69.3129
Myeov2	myeloma overexpressed 2	chr9:99226357-100160431	226.055	172.997	223.532	-0.38593	-0.0161899	-0.36974	0.506958	0.98656	0.572527	240.046	230.026	215.271	226.806	218.127	217.433	159.749	180.208	148.942	158.651	281.199	230.639	206.336	175.956
Lamb2	laminin, beta 2	chr8:116613076-116625217	225.544	172.687	212.935	-0.38525	-0.0829937	-0.302257	0.228242	0.872131	0.418696	214.115	238.014	200.445	280.931	194.212	170.804	200.625	189.601	127.311	175.093	254.357	180.069	182.866	234.448
Dnajc8	DnaJ (Hsp40) homolog, subfamily C, member 8	chr5:154393927-154411985	209.754	172.628	192.488	-0.281032	-0.123928	-0.157103	0.314644	0.747122	0.661682	205.745	205.543	193.137	225.516	218.83	201.358	142.427	163.398	183.11	172.849	190.956	172.897	190.826	215.275
Ccdc80	coiled-coil domain containing 80	chr11:64747814-64781404	310.989	172.114	170.282	-0.853498	-0.868934	0.0154356	0.00267407	0.00357487	0.977591	314.977	332.176	335.601	183.273	388.917	132.725	144.395	242.644	193.451	147.356	147.906	88.066	195.268	249.89
Cox7a2l	cytochrome c oxidase subunit VIIa polypeptide 2 like	chr6:6650365-6664316	202.536	171.668	204.86	-0.238561	0.0164606	-0.255021	0.401113	0.973145	0.395905	182.806	216.501	206.12	193.987	213.267	188.042	185.076	161.95	166.434	156.837	252.92	179.095	188.678	198.748
Ywhag	tyrosine 3-monooxygenase/tryptophan 5-monooxygenase activation protein, gamma polypeptide	chr12:25788285-25816532	163.097	171.631	225.963	0.0735756	0.470354	-0.396778	0.854972	0.0760834	0.156451	136.875	146.524	141.134	156.86	234.095	159.112	131.765	166.147	224.483	176.648	210.531	218.207	289.621	185.494
Arpc3	actin related protein 2/3 complex, subunit 3	chr12:41533345-41548335	137.149	170.779	142.466	0.316382	0.0548686	0.261513	0.206616	0.895839	0.362395	135.022	130.716	127.684	145.116	147.208	181.776	164.157	172.392	151.355	184.214	133.473	147.302	160.602	128.486
Fcer1g	Fc fragment of IgE, high affinity I, receptor for; gamma polypeptide	chr13:94228758-94233191	65.3601	170.732	58.2108	1.38525	-0.167123	1.55238	0.000653095	0.651108	0.000653095	65.2139	48.9752	109.933	38.3098	64.3685	187.227	165.451	219.413	150.035	131.536	64.6505	60.7994	57.3586	50.0349
Ppic	peptidylprolyl isomerase C	chr18:47585433-47598040	126.886	170.468	108.734	0.425966	-0.222731	0.648697	0.0743407	0.484133	0.00822323	126.365	129.649	126.443	123.976	127.998	206.341	139.364	230.083	124.214	152.336	104.46	168.998	73.8245	87.6533
Morf4l2	mortality factor 4 like 2	chrX:107278230-107289323	199.382	170.395	218.304	-0.226659	0.130799	-0.357458	0.453105	0.737522	0.206171	191.196	217.466	217.976	199.776	170.498	173.899	165.029	183.744	143.378	185.923	208.627	220.878	223.283	220.428
Crip1	cysteine-rich protein 1 (intestinal)	chr6:146953513-146961385	111.318	170.188	122.457	0.612442	0.137596	0.474845	0.00441716	0.717105	0.0594867	114.267	122.532	109.762	122.296	87.7318	177.656	144.447	170.952	96.7961	261.087	96.6489	173.023	104.566	115.592
Map7d1	MAP7 domain containing 1	chr5:148018368-148042648	227.333	169.459	198.34	-0.42387	-0.196834	-0.227036	0.132479	0.616609	0.532893	213.146	233.333	225.198	270.534	194.453	161.002	196.149	169.667	144.06	176.417	190.467	158.649	185.17	259.072
Pitpna	phosphatidylinositol transfer protein, alpha	chr10:64232946-64273229	137.586	169.28	154.529	0.299083	0.167545	0.131537	0.268125	0.625494	0.726462	149.895	128.47	133.896	130.82	144.847	181.443	163.918	186.94	143.788	170.31	151.508	164.47	143.099	159.037
Nedd4	neural precursor cell expressed, developmentally down-regulated 4, E3 ubiquitin protein ligase	chr8:73679012-73764446	213.5	167.97	194.973	-0.346033	-0.130958	-0.215075	0.27204	0.779022	0.59005	213.822	245.395	228.894	182.307	197.083	151.165	170.895	170.749	176.372	170.669	186.988	169.907	198.627	224.371
Prr13	proline rich 13	chr7:141857063-141860371	110.727	166.674	117.279	0.590021	0.0829296	0.507091	0.00441716	0.83111	0.0319256	83.9727	100.222	138.176	99.1766	132.088	170.254	200.104	171.799	122.597	168.618	130.297	105.738	96.194	136.886
Ptgis	prostaglandin I2 (prostacyclin) synthase	chr3:170109316-170143882	196.57	166.05	164.452	-0.243425	-0.25738	0.0139551	0.415792	0.406917	0.977431	219.877	204.575	194.373	228.61	135.414	189.555	218.535	128.669	114.225	179.266	172.07	150.506	145.099	190.132
Crip2	cysteine-rich protein 2	chr6:146947887-146952833	200.11	164.659	163.318	-0.281316	-0.29311	0.0117941	0.293792	0.304351	0.979441	209.342	193.477	212.094	214.724	170.915	195.86	187.466	150.938	112.482	176.549	160.72	167.167	151.107	174.279
Gdi1	GDP dissociation inhibitor 1	chr1:152140880-152147543	231.269	163.918	188.474	-0.496593	-0.295202	-0.201391	0.0408588	0.350588	0.568007	236.339	235.88	224.712	258.253	201.158	182.022	194.44	146.475	124.695	171.958	224.811	167.267	162.835	198.984
Pkig	protein kinase inhibitor, gamma	chr3:166238135-166305338	168.731	163.827	145.892	-0.0425462	-0.209818	0.167272	0.918943	0.498969	0.622539	184.014	176.679	167.213	181.005	134.742	199.295	226.444	138.286	100.114	154.998	135.161	168.123	128.176	152.109
Junb	jun B proto-oncogene	chr19:37068594-37070379	81.681	163.767	47.5936	1.00357	-0.779234	1.78281	0.000653095	0.000653095	0.000653095	166.911	41.7526	84.1532	88.9232	26.6646	183.151	101.035	205.414	140.103	189.131	41.0152	80.5835	35.2847	33.4908
Atp6ap1	ATPase, H+ transporting, lysosomal accessory protein 1	chr1:152148119-152155200	191.159	163.653	152.734	-0.224128	-0.323746	0.0996179	0.465472	0.268868	0.805264	208.11	184.567	193.354	196.338	173.425	193.273	168.567	165.051	130.096	161.279	181.481	147.916	133.674	147.867
Pttg1ip	pituitary tumor-transforming 1 interacting protein	chr20:13912728-13929990	166.173	163.572	174.32	-0.022761	0.0690582	-0.0918192	0.961788	0.876637	0.823987	170.101	166.292	165.259	155.766	173.444	156.01	172.474	168.871	161.83	158.673	166.344	137.726	180.143	213.069
Txn1	thioredoxin 1	chr5:79201385-79209384	130.356	163.528	162.178	0.327079	0.315112	0.0119671	0.213864	0.284883	0.977591	123.538	150.472	154.259	83.0286	140.485	178.694	122.097	162.337	179.798	174.716	162.125	206.175	159.583	120.827
Adipoq	adiponectin, C1Q and collagen domain containing	chr11:84363939-84382663	113.013	163.338	210.034	0.531372	0.894135	-0.362763	0.0920309	0.000653095	0.324772	94.6284	65.9141	107.473	62.5637	234.485	89.3238	51.6674	184.825	416.333	74.5377	189.365	201.877	327.22	121.672
Anxa2	annexin A2	chr8:80014389-80050845	120.975	163.285	137.434	0.432678	0.184022	0.248655	0.0700536	0.574281	0.414406	126.723	117.107	118.812	109.815	132.419	188.536	137.914	172.808	110.316	206.85	118.503	168.394	122.481	140.357
Retsat	retinol saturase (all trans retinol 13,14 reductase)	chr4:165235747-165244511	124.239	163.077	226.891	0.392442	0.868886	-0.476444	0.165584	0.000653095	0.11936	141.649	90.6515	112.8	106.009	170.084	109.185	85.4507	183.393	328.679	108.677	218.184	232.628	341.929	114.822
Rab2a	RAB2A, member RAS oncogene family	chr5:26386176-26448787	138.7	162.423	157.984	0.227787	0.187805	0.0399824	0.40783	0.547933	0.925144	161.476	142.338	120.355	131.997	137.336	175.408	162.887	180.301	142.035	151.486	143.588	171.92	154.468	161.959
Prss23	protease, serine, 23	chr1:160037250-160045625	195.349	161.936	202.981	-0.270631	0.0552907	-0.325922	0.351272	0.903632	0.283722	233.944	186.669	185.021	182.84	188.271	187.025	158.951	184.572	119.827	159.304	239.216	129.36	182.978	260.371
Tmbim6	transmembrane BAX inhibitor motif containing 6	chrX:115557800-115572714	135.621	161.626	194.755	0.253079	0.522086	-0.269007	0.349586	0.0256739	0.352011	127.515	127.978	145.899	119.311	157.401	168.341	147.697	151.389	171.064	169.638	167.237	188.573	257.445	165.767
Eif5a	eukaryotic translation initiation factor 5A	chr10:56272201-56276602	158.713	160.518	179.7	0.0163115	0.179164	-0.162853	0.970173	0.587738	0.633722	173.941	145.472	169.712	144.151	160.29	194.935	138.273	153.45	136.631	179.301	155.941	190.584	193.639	178.634
Fgfr1	Fibroblast growth factor receptor 1	chr16:70925603-70965251	165.673	159.483	161.282	-0.0549372	-0.0387514	-0.0161858	0.897426	0.933261	0.974182	157.454	179.846	187.185	176.971	126.91	178.629	154.769	157.375	109.942	196.699	174.722	136.003	157.059	177.346
Srek1	splicing regulatory glutamine/lysine-rich protein 1	chr2:52939244-52957927	137.005	159.096	133.712	0.215671	-0.0350976	0.250768	0.458593	0.937123	0.410156	117.72	132.427	122.807	174.88	137.189	186.795	164.469	136.66	166.391	141.163	140.066	126.343	107.945	160.493
Arpc1b	actin related protein 2/3 complex, subunit 1B	chr12:12819937-13740743	107.411	159.038	105.931	0.566232	-0.0200105	0.586243	0.477486	0.988967	0.523848	107.976	124.546	113.884	103.154	87.4931	211.665	142.717	176.942	98.8642	165.001	109.171	148.889	73.3055	92.3592
Ldhb	lactate dehydrogenase B	chr4:240918031-240935938	171.198	159.017	291.142	-0.10648	0.76606	-0.87254	0.784819	0.00121133	0.000653095	158.391	154.9	165.23	146.366	231.102	98.5887	88.3822	139.902	331.382	136.832	277.343	323.352	366.735	197.137
Pdgfrb	platelet derived growth factor receptor, beta polypeptide	chr18:55596757-55637692	129.985	158.974	120.964	0.290447	-0.103765	0.394212	0.369815	0.812175	0.220604	118.049	140.828	141.115	122.42	127.512	181.068	146.761	174.352	105.481	187.207	134.308	116.013	85.6427	147.891
Ddit3	DNA-damage inducible transcript 3	chr7:70754397-70776456	180.948	158.943	149.162	-0.18707	-0.278699	0.0916291	0.656872	0.491842	0.869001	153.366	185.495	189.567	208.95	167.365	187.148	135.604	166.099	151.708	154.156	143.577	165.684	167.109	120.28
Scpep1	serine carboxypeptidase 1	chr10:73846393-73880406	129.268	158.737	120.631	0.296274	-0.099765	0.396039	0.285434	0.797768	0.13704	135.366	131.279	131.751	117.329	130.616	185.459	148.08	179.268	128.309	152.568	141.583	115.62	121.538	103.782
Crispld2	cysteine-rich secretory protein LCCL domain containing 2	chr19:63411525-63452571	311.613	158.322	253.767	-0.976898	-0.296256	-0.680642	0.000653095	0.435514	0.0186805	323.801	325.382	320.972	319.641	268.27	154.917	146.624	167.156	132.664	190.247	218.415	220.607	270.33	305.714
Wisp2	WNT1 inducible signaling pathway protein 2	chr3:166397531-166408879	83.7066	157.545	84.2946	0.912347	0.0100976	0.902249	0.000653095	0.982263	0.000653095	80.1139	81.2659	85.798	67.3826	103.973	221.336	79.0541	162.079	129.943	195.312	89.4231	65.475	48.7149	133.565
Ptgs1	prostaglandin-endoperoxide synthase 1	chr3:20869941-20891509	76.3947	156.717	94.9559	1.03661	0.313785	0.722828	0.000653095	0.286995	0.00221111	101.212	59.3136	63.9426	101.932	55.5734	192.114	210.555	141.098	92.5054	147.311	107.213	104.115	67.4184	101.078
Prnp	prion protein	chr3:131010027-131025366	110.682	156.193	97.402	0.496903	-0.184403	0.681306	0.0419568	0.577871	0.00401415	140.434	122.071	98.5821	102.097	90.2286	155.709	163.86	156.532	136.254	168.608	101.136	94.3285	86.9435	107.2
Rpl19	ribosomal protein L19	chr10:85767183-85774814	227.85	155.764	188.557	-0.548724	-0.273083	-0.275641	0.00934149	0.337978	0.323385	243.051	238.756	245.078	208.225	204.139	151.882	166.233	163.63	142.837	154.236	225.909	167.658	179.887	180.774
Eef1b2	eukaryotic translation elongation factor 1 beta 2	chr9:69762336-69765059	160.528	155.404	163.477	-0.0468022	0.0262601	-0.0730623	0.906465	0.952919	0.852564	144.077	153.96	170.49	163.557	170.558	145.111	170.238	151.692	159.697	150.283	175.012	180.344	148.584	149.968
Efhd2	EF-hand domain family, member D2	chr5:164119685-164135720	134.808	155.318	129.164	0.204321	-0.0617014	0.266022	0.522233	0.888899	0.395252	181.864	123.445	107.913	166.91	93.9076	174.06	196.236	148.205	111.019	147.07	126.633	126.202	119.396	144.425
Gpd1	glycerol-3-phosphate dehydrogenase 1 (soluble)	chrX:115875187-115882578	228.842	155.211	550.66	-0.560124	1.26681	-1.82693	0.0927402	0.000653095	0.000653095	206.682	147.923	219.905	135.833	433.868	51.1919	84.911	148.354	386.46	105.137	504.673	571.873	900.948	225.148
Efemp2	EGF-containing fibulin-like extracellular matrix protein 2	chr1:227783785-227790740	123.914	155.157	109.304	0.324393	-0.180985	0.505377	0.20525	0.583551	0.0385264	125.002	116.498	124.563	138.599	114.907	211.368	113.7	169.406	112.029	169.282	125.329	140.819	87.436	83.633
Btg2	BTG family, member 2	chr13:55966298-55970058	252.074	155.148	162.288	-0.700204	-0.635292	-0.0649127	0.00563845	0.0226298	0.8884	403.135	265.533	220.239	218.442	153.02	171.879	145.116	164.89	150.161	143.693	111.188	249.609	177.867	110.488
Rbpms	RNA binding protein with multiple splicing	chr16:61618903-61753849	241.596	154.84	205.537	-0.641821	-0.233204	-0.408617	0.00313022	0.459396	0.119313	287.507	244.607	261.69	254.98	159.198	158.19	236.515	128.252	113.087	138.156	239.436	150.676	182.915	249.119
Rpl22	ribosomal protein L22	chr5:173059733-173066458	160.821	154.245	152.025	-0.0602242	-0.0811402	0.020916	0.875286	0.836106	0.963831	150.226	145.536	124.736	178.695	204.91	139.817	135.382	152.601	177.721	165.706	177.8	113.381	155.595	161.325
Phyh	phytanoyl-CoA 2-hydroxylase	chr17:78953399-78970299	173.705	154.202	323.272	-0.171824	0.896107	-1.06793	0.68497	0.000653095	0.000653095	139.878	104.555	151.847	108.667	363.58	80.9604	77.1021	111.562	409.096	92.2878	344.499	286.402	492.753	169.436
LOC687575	NA	chr20:12582584-12593473	194.43	154.161	196.171	-0.334812	0.0128617	-0.347673	0.172993	0.977075	0.183337	150.557	181.458	186.987	226.295	226.853	163.21	149.963	139.952	156.338	161.343	193.94	212.926	182.928	194.892
Myl12b	myosin, light chain 12B, regulatory	chr9:118761452-118775834	137.035	153.646	115.2	0.165073	-0.250404	0.415477	0.590522	0.399155	0.0923324	120.951	143.644	152.5	126.132	141.946	174.432	146.705	145	130.162	171.933	110.536	110.338	115.772	124.152
Cdh13	cadherin 13	chr19:61621433-62720154	51.4897	152.873	59.1056	1.56998	0.199011	1.37097	0.000653095	0.539117	0.000653095	56.3929	63.7407	44.2999	55.5704	37.4446	179.009	180.05	157.017	96.2909	152.001	56.9835	79.8471	47.9371	51.6545
Atp5h	ATP synthase, H+ transporting, mitochondrial Fo complex, subunit d	chr10:104306419-104311229	205.818	152.525	276.835	-0.432316	0.427659	-0.859975	0.0645716	0.0890531	0.000653095	222.688	177.594	147.752	212.29	268.764	130.8	104.835	145.999	221.103	159.891	308.527	252.787	349.907	196.118
Rock1	Rho-associated coiled-coil containing protein kinase 1	chr18:1317218-1432456	165.983	151.944	189.056	-0.127497	0.187776	-0.315273	0.761161	0.646133	0.377366	157.541	152.547	187.788	188.834	143.206	134.471	232.733	106.573	150.21	135.734	187.216	129.003	200.09	239.916
Col4a1	collagen, type IV, alpha 1	chr16:82987856-83097435	111.872	151.931	112.714	0.441567	0.0108147	0.430752	0.135016	0.983194	0.178398	118.617	103.62	107.815	119.694	109.615	176.125	163.061	191.438	103.531	125.499	117.502	110.635	101.403	121.316
Ltbp3	latent transforming growth factor beta binding protein 3	chr1:228032960-228062567	197.235	151.732	161.091	-0.378388	-0.292043	-0.0863455	0.271369	0.469623	0.87235	187.863	194.351	206.443	213.574	183.945	151.984	139.487	166.339	113.464	187.388	147.818	135.148	163.312	198.086
Id2	inhibitor of DNA binding 2	chr6:53084390-53086222	82.9024	151.386	93.4024	0.868751	0.172046	0.696704	0.000653095	0.609042	0.000653095	99.4119	62.7998	81.1862	75.1894	95.9245	160.683	192.529	148.462	121.213	134.044	69.66	92.5397	99.0669	112.343
Cfdp1	craniofacial development protein 1	chr19:54796565-54885236	173.505	151.055	192.043	-0.199902	0.146459	-0.346361	0.494439	0.678941	0.199565	163.164	170.288	162.219	176.364	195.487	153.135	144.368	144.222	165.525	148.022	212.236	188.454	155.136	212.347
Rpl5	ribosomal protein L5	chr14:2861179-2867612	210.456	150.894	200.269	-0.479987	-0.0715788	-0.408408	0.0353991	0.863125	0.109335	198.452	212.962	229.857	212	199.009	154.799	165.68	125.032	164.701	144.255	240.932	182.71	177.447	199.987
Arl3	ADP-ribosylation factor-like 3	chr1:273718179-273753576	223.059	150.69	187.297	-0.565836	-0.252095	-0.313741	0.0103657	0.403533	0.251952	204.252	215.695	226.21	222.178	246.958	162.916	165.853	145.952	130.925	147.806	236.121	174.139	149.225	189.703
Emp1	epithelial membrane protein 1	chr4:233429708-233449799	52.149	150.69	60.7143	1.53087	0.219397	1.31147	0.000653095	0.488882	0.000653095	59.3758	57.225	54.2482	34.0568	55.8393	146.685	152.208	167.092	116.479	170.984	52.9078	84.2878	45.6947	59.9669
Rpl7	ribosomal protein L7	chr5:2621854-2624862	232.533	150.634	189.355	-0.626387	-0.296337	-0.33005	0.00221111	0.286765	0.217721	263.407	239.008	231.761	211.886	216.601	159.906	157.174	131.257	149.686	155.147	218.458	164.891	177.754	196.318
Spop	speckle-type POZ protein	chr10:83040795-83121507	159.34	150.619	145.514	-0.0812	-0.13095	0.04975	0.842309	0.740698	0.914293	182.305	183.943	174.352	132.419	123.678	186.651	185.934	118.589	124.621	137.3	171.082	140.895	109.684	160.394
RGD1310587	similar to hypothetical protein FLJ14146	chr13:107456592-107466329	160.34	150.582	147.044	-0.0905863	-0.124888	0.0343015	0.82327	0.753594	0.941372	138.532	156.572	147.707	161.504	197.383	148.67	205.927	132.05	142.514	123.748	147.12	131.138	124.137	185.78
Maff	v-maf avian musculoaponeurotic fibrosarcoma oncogene homolog F	chr7:120573572-120584925	83.8797	150.559	110.889	0.843938	0.402717	0.441222	0.000653095	0.112677	0.10142	78.9675	105.995	91.7304	75.6431	67.0626	151.04	232.703	106.575	114.893	147.586	120.7	128.634	103.455	90.7655
Ilk	integrin-linked kinase	chr1:177584792-177592280	231.295	150.523	174.806	-0.619746	-0.403979	-0.215767	0.0103657	0.16749	0.542711	232.707	218.421	218.04	311.723	175.584	176.278	186.113	133.354	104.59	152.282	176.144	174.054	163.051	185.975
Ywhab	tyrosine 3-monooxygenase/tryptophan 5-monooxygenase activation protein, beta polypeptide	chr3:166577977-166586801	151.956	150.373	149.919	-0.0151024	-0.0194648	0.00436243	0.973905	0.96836	0.994013	161.659	140.793	150.632	145.112	161.583	142.865	138.498	155.195	175.025	140.284	150.235	143.124	159.825	146.494
Rsu1	Ras suppressor protein 1	chr17:82009673-82197926	175.616	150.149	168.246	-0.226034	-0.0618515	-0.164183	0.43994	0.88571	0.638016	200.693	168.429	181.709	158.828	168.423	160.998	173.422	151.256	116.901	148.167	156.237	140.271	167.459	209.018
Errfi1	ERBB receptor feedback inhibitor 1	chr5:171529355-171542775	348.706	150.066	223.202	-1.21642	-0.643664	-0.572755	0.000653095	0.0736374	0.0371004	789.062	227.035	284.216	259.785	183.433	130.55	193.504	186.083	82.2676	157.923	247.906	219.565	270.268	155.068
Mea1	male-enhanced antigen 1	chr9:15516927-15518751	129.965	149.84	153.534	0.205305	0.240435	-0.0351298	0.473247	0.417023	0.938265	122.199	121.778	141.819	125.081	138.946	165.244	119.015	164.17	135.581	165.191	146.895	138.75	175.464	153.026
Ppap2a	phosphatidic acid phosphatase type 2A	chr2:63704786-63827188	114.854	149.586	141.523	0.38118	0.301238	0.0799415	0.210243	0.379895	0.867184	114.023	115.925	143.786	122.763	77.7717	197.992	122.737	147.122	114.827	165.254	156.068	119.608	145.096	145.319
Tnfrsf12a	tumor necrosis factor receptor superfamily, member 12a	chr10:12818948-12820975	167.802	149.273	246.23	-0.1688	0.553248	-0.722048	0.602092	0.0218377	0.00173202	146.492	200.308	236.22	182.225	73.763	209.94	126.81	120.809	91.6979	197.109	269.012	248.78	228.27	238.856
Fkbp2	FK506 binding protein 2	chr1:229223201-229225877	195.936	149.251	185.955	-0.392648	-0.07543	-0.317218	0.0931798	0.851018	0.242395	157.535	167.518	220.731	223.058	210.839	186.637	131.18	154.676	127.883	145.878	225.714	176.499	161.695	179.914
Dazap2	DAZ associated protein 2	chr7:140043811-140066042	165.525	148.888	149.699	-0.152815	-0.144984	-0.00783077	0.651664	0.695462	0.988174	178.564	179.219	169.318	162.059	138.463	160.046	189.682	138.652	123.946	132.115	157.803	148.716	134.634	157.642
Etfb	electron-transfer-flavoprotein, beta polypeptide	chr1:99549580-99563745	220.734	148.442	456.957	-0.572409	1.04975	-1.62215	0.0261852	0.000653095	0.000653095	176.706	176.12	176.33	188.213	386.303	103.837	65.3908	137.557	320.825	114.602	491.965	462.198	648.174	225.489
Atp5e	ATP synthase, H+ transporting, mitochondrial F1 complex, epsilon subunit	chr3:178609110-178612013	173.182	147.788	217.779	-0.228756	0.330582	-0.559338	0.43304	0.223319	0.0189735	151.497	164.99	139.33	170.675	239.416	166.692	72.8292	140.557	183.978	174.884	242.224	232.778	250.313	145.802
Slc39a1	solute carrier family 39 (zinc transporter), member 1	chr2:209042654-209048222	103.426	147.774	126.202	0.514801	0.287146	0.227656	0.0269911	0.330304	0.490017	104.666	94.0343	98.3319	109.725	110.372	148.685	140.882	165.77	129.63	153.905	113.677	150.249	106.235	134.649
Serf2	small EDRK-rich factor 2	chr3:119955947-119963592	145.97	147.71	143.185	0.017097	-0.0277908	0.0448878	0.970503	0.953402	0.922412	144.472	142.949	150.011	158.001	134.417	178.844	128.73	165.352	105.652	159.972	146.463	150.373	137.298	138.606
Dynll2	dynein light chain LC8-type 2	chr10:74829854-74837880	216.479	147.677	226.103	-0.551781	0.0627562	-0.614537	0.0234435	0.892068	0.014794	209.754	190.797	197.418	225.009	259.417	158.04	138.152	148.774	153.452	139.967	275.608	213.42	224.249	191.136
Itgb5	integrin, beta 5	chr11:73146145-73261215	107.441	147.487	104.688	0.457046	-0.0374458	0.494492	0.0802674	0.936689	0.0760834	101.808	112.378	102.215	115.109	105.695	182.512	108.204	162.377	98.8778	185.465	115.153	105.599	84.2099	113.791
Ly6e	lymphocyte antigen 6 complex, locus E	chr7:116253794-116257488	106.817	146.465	61.8865	0.455414	-0.78745	1.24286	0.0467557	0.000653095	0.000653095	113.401	94.7119	113.994	105.777	106.203	174.018	140.871	189.661	118.611	109.167	57.6696	84.5595	68.6418	36.6749
Map1lc3a	microtubule-associated protein 1 light chain 3 alpha	chr3:157169533-157171180	234.475	145.86	195.307	-0.684851	-0.263689	-0.421162	0.00221111	0.373059	0.0982071	220.044	211.995	233.767	266.185	240.385	190.843	140.213	130.853	107.418	159.971	227.825	173.763	181.485	198.155
Nr4a1	nuclear receptor subfamily 4, group A, member 1	chr7:140713168-140721072	230.247	145.653	135.293	-0.660642	-0.767096	0.106454	0.00896933	0.00313022	0.808994	278.23	303.587	199.097	188.582	181.737	149.42	79.5739	208.283	125.517	165.473	90.7707	151.471	233.9	65.0295
2002-09-01	septin 2	chr9:100277908-100433656	149.912	145.53	156.138	-0.0428026	0.0587063	-0.101509	0.933239	0.912551	0.832491	152.78	146.912	151.505	153.138	145.225	158.351	141.458	147.278	122.342	158.219	153.095	162.267	143.415	165.775
Ypel3	yippee-like 3 (Drosophila)	chr1:205190392-205193684	157	145.428	125.173	-0.110466	-0.326845	0.216379	0.751097	0.222054	0.492193	136.656	168.029	175.579	155.231	149.508	154.861	200.253	131.689	140.969	99.3672	164.432	109.173	110.793	116.293
Fkbp9	FK506 binding protein 9	chr4:151819738-151885188	153.524	145.274	156.77	-0.0796904	0.0301845	-0.109875	0.842124	0.952046	0.788557	162.936	146.829	159.865	137.922	160.07	160.199	127.567	173.022	118.223	147.359	152.053	150.006	145.319	179.703
Iscu	iron-sulfur cluster assembly enzyme	chr12:50403337-50409181	172.095	145.154	205.903	-0.245619	0.258762	-0.504381	0.372185	0.391542	0.0351614	167.826	158.606	169.321	146.97	217.751	150.897	127.349	146.775	160.802	139.946	228.356	210.34	241.38	143.536
Ift20	intraflagellar transport 20 homolog (Chlamydomonas)	chr10:65832268-65837760	214.622	145.057	147.283	-0.56518	-0.543201	-0.0219788	0.0166006	0.0234435	0.964458	211.359	217.477	202.451	256.088	185.733	260.036	113.481	120.154	97.2744	134.337	173.719	152.953	101.781	160.681
Hbegf	heparin-binding EGF-like growth factor	chr18:29036862-29046746	109.595	144.802	126.856	0.401893	0.211	0.190894	0.11834	0.531647	0.588299	133.249	136.255	142.209	77.138	59.1264	194.711	121.649	128.271	79.4068	199.972	113.919	192.244	113.85	87.41
Hspb6	heat shock protein, alpha-crystallin-related, B6	chr1:90162931-90165071	372.519	144.798	269.316	-1.36328	-0.468016	-0.895261	0.000653095	0.0858961	0.000653095	458.428	356.411	391.259	388.405	268.094	169.735	157.116	152.671	84.6501	159.817	318.987	185.453	243.411	329.414
Sar1a	SAR1 homolog A (S. cerevisiae)	chr20:33095743-33108151	162.354	144.687	150.056	-0.166213	-0.113642	-0.0525712	0.625107	0.774394	0.905372	160.692	145.546	168.071	176.734	160.73	152.522	139.457	150.149	133.94	147.365	154.495	153.461	137.647	154.623
Ifi27	interferon, alpha-inducible protein 27	chr6:136548489-136554961	193.479	144.643	152.143	-0.419679	-0.346748	-0.0729316	0.0711405	0.197755	0.853511	210.44	197.672	194.366	174.711	190.205	177.497	131.419	150.326	150.86	113.113	172.706	182.207	152.21	101.45
Olfml2b	olfactomedin-like 2B	chr13:93609912-93647084	225.197	144.492	204.009	-0.640193	-0.142551	-0.497642	0.0103657	0.736981	0.0793802	181.205	239.422	275.775	283.019	146.564	166.418	155.425	165.91	84.8107	149.898	180.268	232.063	224.525	179.183
Nxf1	nuclear RNA export factor 1	chr1:231895707-231908901	128.474	144.406	128.502	0.168653	0.000312077	0.16834	0.60716	0.999121	0.631924	113.44	138.07	125.242	154.733	110.885	145.026	158.741	132.825	117.061	168.376	140.162	131.144	120.954	121.748
Rps15	ribosomal protein S15	chr7:12451928-12453368	198.505	143.883	168.686	-0.464281	-0.234833	-0.229448	0.0316662	0.415451	0.436043	198.45	196.67	219.474	191.778	186.152	163.324	129.857	137.493	138.552	150.186	180.093	173.07	160.646	160.935
Akap17a	A kinase (PRKA) anchor protein 17A	chr12:20512069-20516115	174.205	143.484	148.97	-0.279904	-0.225763	-0.0541411	0.336006	0.505856	0.904345	132.996	177.348	149.998	214.111	196.574	148.41	150.142	126.173	147.81	144.883	167.165	134.401	131.493	162.823
Lims2	LIM and senescent cell antigen like domains 2	chr18:24422407-24538352	337.645	142.686	223.735	-1.24266	-0.593716	-0.648947	0.000653095	0.0351614	0.014794	331.819	347.514	387.444	431.662	189.787	171.109	216.779	119.081	83.961	122.5	279.662	165.912	204.101	245.265
Prkar1a	protein kinase, cAMP-dependent, regulatory, type I, alpha	chr10:97655260-97671804	148.707	142.679	197.702	-0.0596969	0.410851	-0.470548	0.877115	0.110469	0.0623831	141.932	140.194	158.968	129.445	172.997	118.98	143.248	146.306	154.945	149.918	187.2	160.358	211.339	231.908
Sncg	synuclein, gamma (breast cancer-specific protein 1)	chr16:8493024-10843082	116.159	142.482	104.802	0.294685	-0.148431	0.443116	0.745262	0.89788	0.618348	94.329	116.095	120.661	102.712	146.997	115.183	115.451	176.395	176.844	128.538	107.194	134.619	94.7275	82.6668
Syf2	SYF2 pre-mRNA-splicing factor	chr5:157038600-157046526	124.724	141.707	140.889	0.184173	0.175821	0.00835212	0.537926	0.590522	0.98656	122.75	126.731	109.534	118.959	145.645	118.853	163.332	125.848	157.086	143.416	150.179	124.891	138.51	149.977
Sfpq	splicing factor proline/glutamine-rich	chr5:148849943-148858919	172.567	141.672	196.91	-0.284601	0.190381	-0.474983	0.322438	0.596023	0.0786348	169.33	159.39	175.188	176.629	182.297	105.642	127.858	146.176	190.92	137.762	198.662	154.175	203.605	231.197
Rnasek	ribonuclease, RNase K	chr10:56592530-56594249	137.761	141.633	131.049	0.0399937	-0.0720572	0.112051	0.92119	0.852433	0.756258	144.192	132.688	148.042	150.209	113.674	166.668	150.78	131.826	113.232	145.66	137.452	132.092	138.567	116.086
Map1b	microtubule-associated protein 1B	chr2:48837123-48930483	268.3	141.591	204.893	-0.922114	-0.388975	-0.533138	0.0063956	0.418696	0.181236	227.852	306.098	241.576	331.779	234.196	164.875	155.564	112.475	127.417	147.625	202.12	135.168	171.496	310.789
Marveld1	MARVEL domain containing 1	chr1:268842275-268846208	163.337	141.388	126.148	-0.208187	-0.372735	0.164548	0.519435	0.196273	0.65471	184.789	157.928	145.256	194.211	134.501	168.502	174.32	123.668	93.2613	147.19	125.962	122.872	108.795	146.963
Ctsa	cathepsin A	chr3:167481586-167507385	83.6379	140.833	85.7419	0.751756	0.0358428	0.715913	0.00173202	0.946608	0.0063956	92.037	86.6468	87.2574	78.4144	73.8341	158.361	140.975	160.369	106.581	137.879	78.8671	87.4682	86.6547	89.9775
Tmem204	transmembrane protein 204	chr10:14233029-14258432	61.9303	140.453	51.8653	1.18137	-0.255877	1.43725	0.000653095	0.38884	0.000653095	78.9794	50.4786	60.2609	75.0646	44.8683	184.912	200.582	111.273	84.9626	120.536	60.097	63.1275	39.6754	44.5612
Dpt	dermatopontin	chr13:87954458-87983311	247.093	139.935	152.055	-0.820292	-0.700462	-0.11983	0.000653095	0.00357487	0.759037	242.787	277.877	254.213	208.45	252.137	138.73	131.869	196.563	117.54	114.975	189.35	123.543	123.344	171.982
Mbd2	methyl-CpG binding domain protein 2	chr18:64990479-65060941	104.522	139.215	115.997	0.413503	0.150278	0.263224	0.079008	0.666792	0.371747	114.595	105.917	105.276	85.9128	110.913	125.229	147.425	140.37	141.316	141.736	102.604	123.217	129.248	108.921
Fau	Finkel-Biskis-Reilly murine sarcoma virus (FBR-MuSV) ubiquitously expressed	chr1:228355747-228357266	229.023	138.912	185.593	-0.721319	-0.303353	-0.417967	0.000653095	0.273749	0.0917115	259.482	265.522	239.023	197.294	183.796	154.191	132.165	127.431	138.059	142.716	246.158	158.174	166.726	171.314
Cfd	complement factor D (adipsin)	chr7:12711158-12963838	22.8798	138.716	69.3964	2.59999	1.60079	0.999199	0.111653	0.355842	0.438331	23.6158	18.7287	17.2218	16.877	37.9555	92.6075	63.8471	111.408	363.269	62.4475	70.5086	76.5347	89.8157	40.7267
Bag3	Bcl2-associated athanogene 3	chr1:206989243-207013177	425.646	138.702	409.69	-1.61766	-0.0551226	-1.56254	0.000653095	0.930533	0.000653095	233.447	580.824	918.189	257.766	138.005	124.828	145.036	136.305	117.945	169.397	404.638	280.214	687.083	266.825
Sost	sclerostin	chr10:89689511-89692559	11.523	138.699	33.447	3.58936	1.53735	2.05201	0.000653095	0.000653095	0.000653095	4.2925	7.95733	19.3688	12.5221	13.4745	185.379	88.2471	148.499	64.4724	206.896	30.3051	24.4493	23.9978	55.0356
H3f3b	H3 histone, family 3B	chr10:103709484-103711710	145.207	138.668	149.7	-0.0664771	0.0439607	-0.110438	0.863465	0.919822	0.775441	171.016	139.344	133.761	133.02	148.896	158.614	117.593	138.108	133.349	145.678	160.938	149.209	140.968	147.685
Serpinf1	serpin peptidase inhibitor, clade F (alpha-2 antiplasmin, pigment epithelium derived factor), member 1	chr10:61954918-61969094	160.914	138.651	85.3684	-0.214834	-0.914518	0.699684	0.474016	0.000653095	0.000653095	180.751	192.721	194.413	99.2986	137.387	144.741	139.18	182.607	108.793	117.935	93.0641	52.1278	89.7362	106.546
Tsc22d1	TSC22 domain family, member 1	chr15:62249642-62348601	188.299	138.557	148.088	-0.442541	-0.346574	-0.0959671	0.0942235	0.25132	0.831684	218.305	172.151	172.122	158.006	220.911	150.196	115.52	167.991	116.277	142.804	171.987	129.025	136.301	155.038
Map4	microtubule-associated protein 4	chr8:117366078-117515388	151.773	138.544	148.701	-0.131572	-0.0295103	-0.102061	0.746411	0.953483	0.824898	143.349	161.693	151.892	149.16	152.774	126.728	173.898	130.623	109.711	151.762	149.115	130.146	147.37	168.172
Ehbp1l1	EH domain binding protein 1-like 1	chr1:227997200-228017354	181.731	138.333	148.008	-0.393665	-0.296132	-0.0975332	0.208798	0.425278	0.83676	149.918	180.348	156.815	235.723	185.852	156.223	141.618	122.468	109.424	161.929	154.927	128.8	130.727	177.578
Krcc1	lysine-rich coiled-coil 1	chr4:163912883-163925865	129.943	138.184	145.516	0.0887048	0.163298	-0.0745929	0.813118	0.641774	0.852676	140.647	116.289	113.359	141.048	138.374	170.152	119.329	126.626	140.534	134.277	156.417	133.914	123.114	168.62
Manf	mesencephalic astrocyte-derived neurotrophic factor	chr8:114983284-114985238	110.39	138.103	119.686	0.323137	0.116653	0.206484	0.197843	0.75146	0.507492	129.878	86.5417	104.709	108.224	122.596	126.754	155.864	158.05	98.4603	151.386	126.287	130.328	112.719	109.413
Rab1a	RAB1A, member RAS oncogene family	chr14:104208419-104235376	131.407	137.976	139.061	0.0703713	0.0816691	-0.0112978	0.853018	0.835648	0.981067	148.465	129.294	127.116	123.967	128.194	130.968	148.057	151.131	126.62	133.103	120.983	145.14	140.114	150.005
Ndufv2	NADH dehydrogenase (ubiquinone) flavoprotein 2	chr9:113404125-113424677	203.242	137.556	283.359	-0.563179	0.479433	-1.04261	0.00969275	0.0617829	0.000653095	214.198	157.857	185.102	162.305	296.747	116.571	118.513	131.791	202.58	118.326	300.182	297.782	362.817	172.656
Spag7	sperm associated antigen 7	chr10:57030582-57036740	193.387	137.514	166.856	-0.491907	-0.212886	-0.27902	0.0298866	0.500885	0.346402	216.139	209.275	181.537	202.084	157.9	177.164	157.253	131.893	102.492	118.77	200.3	161.537	129.954	175.633
Nsrp1	nuclear speckle splicing regulatory protein 1	chr10:62796500-62829732	144.525	136.795	137.52	-0.0793088	-0.0716761	-0.00763266	0.841565	0.867293	0.987684	132.287	120.378	109.709	182.828	177.424	165.311	136.377	117.754	141.991	122.541	147.408	108.495	102.418	191.761
Slc39a7	solute carrier family 39 (zinc transporter), member 7	chr20:5898746-5902119	133.432	136.734	126.402	0.0352623	-0.0780899	0.113352	0.93611	0.852046	0.773809	133.199	119.839	126.479	157.783	129.861	162.316	123.79	147.795	109.739	140.029	110.467	143.993	116.57	134.577
Pdia6	protein disulfide isomerase family A, member 6	chr6:52289503-52306889	101.228	136.287	118.886	0.429037	0.231967	0.19707	0.0748091	0.446906	0.549528	91.5651	89.7038	113.774	93.7672	117.329	147.322	96.8033	181.912	103.411	151.985	121.513	117.404	111.943	124.682
Nfkbia	nuclear factor of kappa light polypeptide gene enhancer in B-cells inhibitor, alpha	chr6:85803989-85807223	169.349	135.941	133.409	-0.317025	-0.344144	0.0271186	0.22903	0.228472	0.952895	251.685	153.573	134.229	161.048	146.211	150.423	134.014	128.339	151.529	115.398	182.209	139.776	130.752	80.8993
Rexo2	RNA exonuclease 2	chr8:51395454-51407172	128.448	135.904	135.797	0.0814039	0.0802686	0.00113524	0.826671	0.841669	0.997922	167.818	112.309	104.893	139.157	118.063	158.843	145.367	148.644	94.498	132.167	138.456	138.436	126.31	139.985
Bcap31	B-cell receptor-associated protein 31	chr1:152845254-152875715	118.035	135.663	168.727	0.200822	0.515483	-0.314661	0.497651	0.0316662	0.255398	114.986	102.129	133.022	105.379	134.656	126.975	119.128	137.769	161.582	132.862	175.728	179.255	181.607	138.319
Tkt	transketolase	chr16:6543528-6568461	238.377	135.571	511.481	-0.814196	1.10144	-1.91563	0.000653095	0.000653095	0.000653095	209.48	212.974	192.473	187.631	389.327	97.8097	58.2659	167.165	208.408	146.206	478.235	516.89	814.057	236.742
Fibin	fin bud initiation factor homolog (zebrafish)	chr3:108150071-108152343	70.9041	135.405	60.2265	0.93334	-0.235472	1.16881	0.000653095	0.433755	0.000653095	78.5225	84.0749	76.6766	57.6367	57.6099	147.123	164.629	126	106	133.273	73.8666	55.8996	54.682	56.4577
Dnaja1	DnaJ (Hsp40) homolog, subfamily A, member 1	chr5:61562287-61573199	260.137	135.046	402.379	-0.945826	0.62928	-1.57511	0.000653095	0.0329369	0.000653095	151.61	365.854	465.011	187.866	130.345	102.783	105.989	150.001	134.204	182.252	348.396	350.199	574.528	336.393
Sdc2	syndecan 2	chr7:71743894-71856340	74.591	134.844	92.1272	0.854216	0.304625	0.549591	0.000653095	0.272807	0.0259303	82.1194	72.2194	79.7261	68.9498	69.9404	149.321	119.339	170.753	80.8803	153.926	85.02	103.582	85.8459	94.0609
Prdx5	peroxiredoxin 5	chr1:229155315-229158301	116.391	134.359	192.583	0.207112	0.726503	-0.519391	0.482492	0.00173202	0.0366367	104.257	96.7064	90.5723	109.687	180.731	120.957	101.587	125.352	196.925	126.972	188.644	189.836	261.825	130.026
Gstp1	glutathione S-transferase pi 1	chr1:226162329-226164798	131.324	134.314	110.157	0.0324861	-0.253563	0.28605	0.937245	0.380722	0.303898	128.834	139.673	139.169	138.752	110.19	155.547	123.045	106.665	137.656	148.658	110.339	106.35	112.737	111.202
Pdlim3	PDZ and LIM domain 3	chr16:49271213-49303131	351.637	134.291	234.841	-1.38873	-0.582402	-0.806326	0.000653095	0.0259303	0.000653095	389.695	397.583	330.574	380.902	259.432	174.433	174.148	113.387	85.2895	124.196	280.686	176.138	212.114	270.427
Use1	unconventional SNARE in the ER 1 homolog (S. cerevisiae)	chr16:19623234-19625903	155.148	133.879	123.67	-0.212717	-0.327144	0.114427	0.459001	0.221049	0.750601	120.081	150.608	155.973	193.686	155.392	145.457	127.086	107.765	138.331	150.754	121.126	112.824	142.903	117.828
Rps5	ribosomal protein S5	chr1:66471608-66475905	177.125	133.702	174.749	-0.405753	-0.0194832	-0.386269	0.0731028	0.965976	0.126444	191.841	197.98	182.447	157.902	155.456	138.984	141.472	114.784	126.13	147.137	201.686	170.298	174.868	152.144
Speg	SPEG complex locus	chr9:82340605-82397945	309.488	133.646	208.519	-1.21147	-0.569705	-0.641766	0.0063956	0.346666	0.235039	288.896	293.224	258.258	396.663	310.4	190.359	142.186	124.756	77.9417	132.987	247.219	166.317	174.416	246.125
Capn2	calpain 2, (m/II) large subunit	chr13:105814748-105864911	134.159	133.595	128.971	-0.00607593	-0.0569	0.0508241	0.990713	0.903764	0.91572	174.422	120.694	117.759	135.675	122.245	144.971	171.622	122.607	105.698	123.078	140.753	110.649	102.65	161.831
Rps3	ribosomal protein S3	chr1:170637727-170643027	160.333	133.322	157.136	-0.266161	-0.0290602	-0.237101	0.308	0.948652	0.425464	158.661	152.175	165.832	174.426	150.571	142.915	141.207	120.902	135.731	125.853	190.245	143.324	144.155	150.819
Cyp2e1	cytochrome P450, family 2, subfamily e, polypeptide 1	chr1:220406341-220416726	1.87381	133.21	4.11303	6.15159	1.13423	5.01736	0.000653095	0.020707	0.000653095	2.22542	1.35897	1.78518	1.09339	2.90608	20.7003	72.1991	4.05202	551.339	17.7597	2.5604	2.08774	4.44067	7.36332
Ehd2	EH-domain containing 2	chr1:79112278-79130529	133.67	132.949	122.832	-0.0078025	-0.121998	0.114196	0.987623	0.749263	0.767324	138.062	129.705	133.941	136.317	130.327	141.484	121.429	143.739	110.635	147.459	126.815	105.324	115.702	143.485
Slc9a3r2	solute carrier family 9, subfamily A (NHE3, cation proton antiporter 3), member 3 regulator 2	chr10:13820309-13830824	101.161	132.917	96.148	0.393872	-0.073324	0.467196	0.112329	0.860785	0.0704698	108.539	125.258	87.1126	107.825	77.0713	177.721	102.72	106.092	124.649	153.402	82.9187	140.219	78.8974	82.5575
Sdcbp	syndecan binding protein	chr5:24256109-24283036	157.342	132.873	167.893	-0.243855	0.0936375	-0.337493	0.405049	0.820432	0.238189	178.776	156.572	159.893	151.874	139.596	126.567	155.357	132.45	125.982	124.009	163.222	156.975	170.52	180.856
Psenen	presenilin enhancer gamma secretase subunit	chr1:90170908-90172105	192.984	132.579	155.534	-0.541626	-0.31125	-0.230376	0.0107371	0.253002	0.445525	220.485	189.998	222.882	189.08	142.475	156.662	151.448	116.276	115.679	122.832	192.645	167.565	137.373	124.553
Ppig	peptidylprolyl isomerase G	chr3:62571743-62600508	167.073	132.434	152.313	-0.335205	-0.133438	-0.201766	0.247761	0.751375	0.583118	153.004	154.458	148.56	188.721	190.624	150.881	116.931	114.399	159.775	120.186	182.032	128.082	143.099	156.04
LOC685322	NA	chr14:85614329-85614509	164.916	132.422	246.249	-0.316584	0.57839	-0.894974	0.273002	0.0229153	0.000653095	185.463	142.655	109.314	178.814	208.334	136.575	96.5983	156.136	130.016	142.786	279.5	197.775	347.163	160.56
Cp	ceruloplasmin (ferroxidase)	chr2:124467561-124551506	59.4921	132.301	72.1114	1.15306	0.277528	0.875529	0.000653095	0.383719	0.000653095	63.1063	76.2908	73.4732	36.6104	47.9798	98.4116	172.78	119.968	139.836	130.512	66.0936	82.4861	63.8286	76.0372
Wdr1	WD repeat domain 1	chr14:76974170-77007900	180.121	132.294	173.873	-0.445221	-0.0509292	-0.394292	0.0852722	0.914129	0.161396	191.794	171.767	166	209.405	161.638	141.133	160.711	124.77	106.751	128.104	176.179	161.099	157.521	200.695
Ndufb8	NADH dehydrogenase (ubiquinone) 1 beta subcomplex 8	chr1:271741835-271746877	184.426	132.019	260.591	-0.482303	0.498745	-0.981048	0.0324166	0.042906	0.000653095	174.258	158.251	146.988	189.733	252.901	132.046	106.51	115.104	175.236	131.197	265.63	256.377	368.788	151.57
Vegfa	vascular endothelial growth factor A	chr9:16232414-16247657	111.81	131.983	170.356	0.239298	0.607501	-0.368203	0.469094	0.0288339	0.247423	100.205	91.4733	83.4851	123.498	160.391	125.593	110.526	113.204	181.695	128.897	169.7	183.678	221.037	107.011
Mrvi1	murine retrovirus integration site 1 homolog	chr1:182668662-182780828	204.585	130.697	149.445	-0.646477	-0.453082	-0.193395	0.0180884	0.177484	0.640524	238.196	188.494	198.227	247.626	150.38	156.18	163.01	121.203	82.9275	130.163	172.326	124.841	130.613	170
Vkorc1	vitamin K epoxide reductase complex, subunit 1	chr1:206361379-206363901	155.852	130.505	123.489	-0.256073	-0.335789	0.0797161	0.345156	0.199133	0.839987	164.967	155.306	175.926	158.657	124.404	156.756	106.268	158.113	84.5353	146.851	121.944	110.868	128.823	132.323
Rac1	ras-related C3 botulinum toxin substrate 1	chr12:15133520-15153741	107.971	130.464	124.534	0.273	0.205888	0.0671128	0.294599	0.497611	0.86498	122.373	113.871	113.313	97.4235	92.8761	131.109	134.278	116.359	123.866	146.707	108.557	123.913	149.693	115.971
Adamts1	ADAM metallopeptidase with thrombospondin type 1 motif, 1	chr11:28966005-28974872	271.458	130.145	215.419	-1.06061	-0.333584	-0.727028	0.000653095	0.402932	0.0204199	306.648	302.255	286.346	293.84	168.204	128.77	193.44	106.764	111.378	110.372	172.305	307.73	317.062	64.5796
Ltbp1	latent transforming growth factor beta binding protein 1	chr6:31097089-31491816	123.397	130.113	136.641	0.076451	0.14708	-0.0706293	0.870059	0.730572	0.886103	138.035	126.594	126.213	119.985	106.161	142.272	128.066	143.065	91.8362	145.325	132.093	131.918	118.823	163.731
Tln1	talin 1	chr5:63558229-63604313	141.812	129.708	119.599	-0.128706	-0.245769	0.117063	0.802925	0.581575	0.829439	127.901	135.622	143.248	173.519	128.769	138.289	184.062	105.934	99.3213	120.935	122.399	108.266	119.626	128.106
Ythdc1	YTH domain containing 1	chr14:22869118-22899294	156.715	129.517	166.361	-0.274998	0.0861774	-0.361175	0.351956	0.84241	0.209831	133.522	150.769	132.915	202.48	163.888	129.683	130.111	109.336	150.458	127.999	175.959	137.288	176.923	175.274
Atp5a1	ATP synthase, H+ transporting, mitochondrial F1 complex, alpha subunit 1, cardiac muscle	chr18:73830603-73838544	198.242	129.409	311.833	-0.615319	0.653514	-1.26883	0.00789002	0.0132558	0.000653095	187.722	162.07	187.196	160.071	294.15	104.466	102.457	143.536	179.433	117.156	291.879	279.393	460.894	215.168
Ano1	anoctamin 1, calcium activated chloride channel	chr1:224612596-224760372	35.6825	129.368	53.4872	1.85819	0.583975	1.27422	0.000653095	0.017493	0.000653095	34.6209	42.202	41.2242	31.7987	28.5668	159.011	128.491	118.195	61.6605	179.482	51.6492	79.5405	36.052	46.7069
Timp1	TIMP metallopeptidase inhibitor 1	chrX:2136335-2206064	36.2843	129.318	54.9296	1.8335	0.598238	1.23526	0.00173202	0.606976	0.173872	39.2916	42.74	46.0459	33.3662	19.978	176.022	119.124	127.627	81.2702	142.545	27.9049	130.67	26.3682	34.7751
Pfdn5	prefoldin subunit 5	chr7:141720702-141725441	159.876	128.905	140.891	-0.310644	-0.182373	-0.128271	0.211603	0.567239	0.722981	159.723	191.285	165.18	149.021	134.168	153.025	130.4	109.945	117.5	133.654	186.268	140.966	119.093	117.236
Sdc4	syndecan 4	chr3:167052788-167071476	114.784	128.732	165.376	0.165455	0.526832	-0.361377	0.626132	0.043336	0.207557	155.53	109.877	128.466	97.291	82.7532	147.623	143.673	105.736	119.438	127.19	156.637	210.374	191.698	102.794
Clstn1	calsyntenin 1	chr5:170179525-170247835	154.126	128.152	143.131	-0.266262	-0.106775	-0.159487	0.401238	0.808804	0.691062	146.056	151.797	151.581	157.905	163.293	125.132	122.113	141.501	110.913	141.099	142.788	103.373	142.5	183.863
Fis1	fission 1 (mitochondrial outer membrane) homolog (S. cerevisiae)	chr12:24760050-24774734	166.65	128.061	131.592	-0.379991	-0.340751	-0.0392399	0.107026	0.207778	0.926758	143.508	156.572	150.353	201.386	181.43	162.172	116.02	121.342	105.779	134.991	124.357	111.642	162.578	127.791
Mxd4	Max dimerization protein 4	chr14:82504736-82516133	104.72	127.567	93.6116	0.284719	-0.161779	0.446498	0.268471	0.62634	0.0720534	117.836	106.496	88.6932	95.2516	115.324	113.017	126.257	145.334	130.322	122.904	79.8419	75.1046	92.5443	126.956
Atg3	autophagy related 3	chr11:64687321-64715836	107.585	126.836	115.529	0.237491	0.102774	0.134717	0.39362	0.78323	0.703674	111.321	121.616	89.2305	104.451	111.305	114.316	127.144	135.129	134.012	123.58	109.427	117.42	109.932	125.335
Rpl28	ribosomal protein L28	chr1:75912935-75915497	149.67	126.676	118.135	-0.240647	-0.341354	0.100707	0.400582	0.213864	0.791654	130.149	140.6	157.165	171.895	148.542	135.657	119.024	98.1024	139.688	140.907	128.076	112.845	124.861	106.757
Calml3	calmodulin-like 3	chr17:71775713-71777089	110.221	126.028	106.547	0.193344	-0.0489013	0.242245	0.532326	0.91487	0.441244	164.61	82.1549	92.4256	133.299	78.6143	116.795	119.311	108.536	172.452	113.043	162.621	85.3069	68.9283	109.333
Plxdc2	plexin domain containing 2	chr17:84957326-85343869	123.577	125.951	115.194	0.0274559	-0.101341	0.128797	0.950837	0.798519	0.742693	130.018	131.621	128.925	116.351	110.967	138.667	119.566	147.512	95.3338	128.676	105.526	107.081	106.796	141.373
Col5a2	collagen, type V, alpha 2	chr9:51757495-51906270	58.9731	125.831	51.9483	1.09336	-0.182981	1.27634	0.000653095	0.597269	0.000653095	62.77	64.7668	58.9454	50.7608	57.6224	143.059	127.21	133.977	78.3684	146.54	45.9257	58.6854	41.3722	61.8098
Eef1g	eukaryotic translation elongation factor 1 gamma	chr1:232101010-232111617	133.915	125.34	134.174	-0.0954657	0.00279391	-0.0982596	0.784819	0.995809	0.798352	121.795	134.493	144.971	115.514	152.8	126.859	128.806	105.969	131.875	133.191	132.226	130.169	131.188	143.114
Drap1	Dr1 associated protein 1 (negative cofactor 2 alpha)	chr1:227733124-227735764	144.666	125.325	150.47	-0.207053	0.0567484	-0.263802	0.478064	0.892045	0.371834	137.924	137.668	132.249	147.492	167.996	139.94	99.6553	129.511	115.48	142.038	143.193	138.719	164.194	155.774
Nono	non-POU domain containing, octamer-binding	chrX:72175056-72192917	123.722	124.982	122.569	0.0146138	-0.0135109	0.0281247	0.973754	0.977375	0.952895	115.385	121.439	117.043	138.07	126.673	115.356	143.23	116.161	125.905	124.257	116.636	116.528	121.806	135.306
Nop58	NOP58 ribonucleoprotein	chr9:66300035-66323766	164.01	124.918	147.859	-0.392797	-0.149558	-0.24324	0.127083	0.693004	0.445199	158.009	172.261	171.994	166.807	150.978	161.887	104.192	102.75	136.272	119.49	183.693	161.588	107.712	138.444
Ankh	ANKH inorganic pyrophosphate transport regulator	chr2:99796581-99921964	25.4101	124.84	33.0394	2.29661	0.378785	1.91782	0.000653095	0.149618	0.000653095	28.582	27.3634	21.3601	27.3656	22.3797	130.946	92.4641	124.767	70.504	205.521	22.6893	49.1093	33.6855	26.6736
Trim44	tripartite motif-containing 44	chr3:98626536-98894480	102.043	124.49	126.434	0.28685	0.309207	-0.0223566	0.267657	0.268356	0.961788	80.4626	107.104	73.2625	123.966	125.418	111.671	130.881	107.037	149.472	123.386	105.198	116.667	107.15	176.721
Eif2s2	eukaryotic translation initiation factor 2, subunit 2 beta	chr3:156763132-156783857	135.872	124.122	144.784	-0.130491	0.0916576	-0.222148	0.695462	0.811728	0.47296	127.719	132.744	133.069	130.22	155.607	134.63	120.551	112.641	146.181	106.606	156.806	140.411	140.232	141.688
Mlf2	myeloid leukemia factor 2	chr4:224470888-224475074	166.331	123.848	139.263	-0.425486	-0.256247	-0.16924	0.0743407	0.398413	0.612977	173.758	145.265	174.543	185.601	152.489	166.391	110.497	126.721	96.3154	119.317	145.342	143.039	134.987	133.684
Fmo2	flavin containing monooxygenase 2	chr13:85649735-85669947	135.48	123.719	82.5255	-0.131023	-0.715173	0.58415	0.725683	0.00221111	0.01927	165.674	149.657	110.75	131.07	120.252	77.0256	201.28	89.362	160.71	90.2156	88.5049	51.8081	86.0493	103.74
Tcf7l1	transcription factor 7-like 1 (T-cell specific, HMG-box)	chr4:165263182-165426980	166.802	123.673	158.387	-0.43161	-0.0746869	-0.356923	0.0957069	0.869479	0.224704	136.709	174.885	192.948	177.911	151.559	133.839	162.574	118.965	87.2277	115.759	153.143	122.203	153.017	205.185
Tnfsf12	tumor necrosis factor ligand superfamily member 12	chr10:56036417-56045715	193.533	123.567	136.277	-0.647287	-0.506036	-0.141251	0.00121133	0.0368508	0.693972	191.15	192.203	186.911	204.688	192.714	134.314	128.829	125.151	98.4645	131.077	124.498	115.42	145.337	159.853
Ddx39b	DEAD (Asp-Glu-Ala-Asp) box polypeptide 39B	chr20:6718276-7038454	138.537	123.533	119.575	-0.165374	-0.212354	0.0469799	0.861762	0.889068	0.963703	118.521	138.043	133.184	186.017	116.921	128.096	133.273	107.707	119.639	128.951	115.744	110.733	117.358	134.466
Btg1	B-cell translocation gene 1, anti-proliferative	chr7:37858320-37860578	78.1328	123.456	108.38	0.659996	0.472103	0.187894	0.000653095	0.0510842	0.578304	80.2873	72.8243	84.0344	64.2367	89.2812	113.188	133.313	108.634	153.188	108.957	105.033	158.274	101.703	68.5109
Vcl	vinculin	chr15:3433520-3522277	182.677	123.36	161.158	-0.566416	-0.180821	-0.385594	0.0306037	0.664113	0.222672	204.342	164.178	193.332	201.966	149.568	138.97	121.923	126.129	92.9206	136.859	170.982	139.484	147.634	186.532
Rpn1	ribophorin I	chr4:185243181-185264593	117.475	123.144	121.87	0.0680026	0.0529924	0.0150102	0.864611	0.901769	0.974638	127.425	107.206	108.019	117.536	127.186	131.078	96.1211	141.656	110.409	136.458	113.972	124.554	125.558	123.395
Hpcal1	hippocalcin-like 1	chr6:52713425-52818871	154.281	122.964	155.587	-0.327324	0.0121621	-0.339486	0.215778	0.979771	0.238947	139.441	134.684	166.158	162.096	169.027	163.269	120.516	127.336	73.8999	129.801	174.211	108.464	145.61	194.064
Serpinb6	serpin peptidase inhibitor, clade B (ovalbumin), member 6	chr17:34084122-34102912	119.949	122.863	113.816	0.034628	-0.0757279	0.110356	0.934185	0.847591	0.766251	125.942	127.251	128.238	117.163	101.154	115.698	163.422	114.899	100.209	120.089	128.391	107.895	101.467	117.51
RGD1564664	similar to LOC387763 protein	chr3:89555987-89557379	314.406	122.502	220.382	-1.35982	-0.512623	-0.847198	0.000653095	0.0569369	0.000653095	362.055	266.578	300.981	328.466	313.951	156.573	135.079	124.896	87.8742	108.09	273.224	134.784	171.76	301.761
Cytl1	cytokine like 1	chr14:77783864-77788875	73.0622	121.974	69.2007	0.739378	-0.0783379	0.817716	0.000653095	0.846101	0.000653095	87.0678	57.4748	101.596	46.5499	72.6231	80.8532	156.098	130.931	142.988	99.0012	95.7421	35.6834	61.7817	83.5958
Cygb	cytoglobin	chr10:105280903-105290670	59.6616	121.906	49.1378	1.03089	-0.279969	1.31086	0.000653095	0.319716	0.000653095	68.6647	68.0555	66.3519	56.9927	38.2431	115.183	156.423	120.382	134.131	83.4101	47.2864	53.7565	51.4569	44.0515
Ppp1r12a	protein phosphatase 1, regulatory subunit 12A	chr7:51419606-51527799	202.624	121.7	181.241	-0.735478	-0.160893	-0.574586	0.00121133	0.703764	0.0349053	200.196	219.23	165.739	269.675	158.278	127.049	149.815	94.148	118.669	118.817	167.649	115.277	170.748	271.29
RGD1359529	similar to chromosome 1 open reading frame 63	chr5:157029892-157033632	153.383	121.675	148.166	-0.334098	-0.0499213	-0.284177	0.196094	0.908222	0.336222	129.131	184.373	172.326	171.126	109.958	131.509	160.678	88.6555	115.497	112.038	162.074	142.259	164.988	123.343
Ctdsp1	CTD (carboxy-terminal domain, RNA polymerase II, polypeptide A) small phosphatase 1	chr9:81437161-81442526	217.554	121.553	155.301	-0.83979	-0.486306	-0.353484	0.000653095	0.065938	0.212524	231.028	200.587	222.833	244.247	189.076	146.895	135.492	120.877	88.6957	115.804	190.664	146.751	131.665	152.124
Rps11	ribosomal protein S11	chr1:102182149-102184258	117.755	121.453	119.841	0.0446086	0.0253266	0.019282	0.911158	0.953561	0.967167	118.981	107.9	132.112	112.292	117.492	127.803	107.528	126.067	121.03	124.837	136.398	109.008	127.197	106.76
Arl6ip5	ADP-ribosylation-like factor 6 interacting protein 5	chr4:194077776-194099732	111.444	121.036	113.79	0.119116	0.030053	0.0890626	0.726035	0.945528	0.816904	138.013	113.218	91.4125	116.643	97.9347	126.836	127.657	114.695	96.2282	139.764	112.568	117.936	97.5776	127.079
Fmo3	flavin containing monooxygenase 3	chr13:85732370-85750452	74.1342	120.791	54.9302	0.704298	-0.432539	1.13684	0.00267407	0.0845797	0.000653095	106.415	86.036	63.2604	57.8856	57.074	81.9691	218.987	74.9087	138.8	89.2885	52.8687	35.3994	62.5001	68.9526
Bri3	brain protein I3	chr12:14374634-14383317	213.434	120.51	180.594	-0.824641	-0.241042	-0.583598	0.000653095	0.415641	0.0135771	212.967	205.12	190.034	245.608	213.443	136.917	125.38	149.58	79.629	111.042	243.915	146.583	140.571	191.308
Cox7c	cytochrome c oxidase, subunit VIIc	chr2:14553401-14555427	157.957	120.497	240.942	-0.390529	0.609157	-0.999686	0.0963743	0.00969275	0.000653095	143.434	150.676	141.565	146.663	207.445	130.494	103.206	102.551	150.296	115.939	237.207	233.493	314.167	178.901
Pla2g16	phospholipase A2, group XVI	chr1:229831483-229864267	179.798	120.484	230.098	-0.57753	0.35587	-0.9334	0.0135771	0.176106	0.000653095	159.882	168.27	178.589	148.237	244.012	84.3491	65.0703	124.427	254.337	74.2395	254.614	220.493	294.547	150.738
Atp5l	ATP synthase, H+ transporting, mitochondrial Fo complex, subunit G	chr8:47838593-47845425	144.89	119.997	218.681	-0.271951	0.593874	-0.865825	0.313862	0.0132558	0.000653095	142.385	145.785	124.237	126.106	185.935	114.901	87.7954	128.944	159.356	108.99	257.875	218.944	264.009	133.896
2015-09-01	selenoprotein 15	chr2:269129473-269162554	110.531	119.86	102.095	0.116897	-0.114539	0.231436	0.738997	0.757952	0.450998	116.349	112.823	119.269	104.647	99.5678	141.364	99.9614	127.839	102.875	127.261	110.832	122.404	88.989	86.156
Magoh	mago-nashi homolog, proliferation-associated (Drosophila)	chr5:131328663-131335512	134.125	119.707	163.335	-0.164068	0.284257	-0.448325	0.593327	0.298696	0.063792	123.135	118.448	145.518	143.819	139.703	126.989	102.175	116.105	120.019	133.247	177.662	184.179	152.054	139.444
Sarnp	SAP domain containing ribonucleoprotein	chr7:3217789-3271843	213.085	119.586	186.677	-0.833381	-0.190882	-0.642499	0.000653095	0.559585	0.00401415	213.774	211.093	201.822	223.998	214.737	136.939	91.3432	125.174	106.785	137.686	193.422	154.631	188.332	210.322
Pfdn2	prefoldin subunit 2	chr13:94353196-94373418	123.493	119.286	148.905	-0.0500055	0.269969	-0.319974	0.898429	0.340907	0.231599	128.614	122.3	121.638	110.736	134.178	109.907	134.633	109.183	131.361	111.346	159.608	142.438	150.814	142.762
Rab13	RAB13, member RAS oncogene family	chr2:209014440-209018836	87.6641	119.2	79.8069	0.44333	-0.135472	0.578802	0.0514658	0.706729	0.0132558	72.7367	87.7629	83.9852	110.808	83.0278	140.974	148.445	114.378	89.6943	102.51	77.5595	111.407	55.2485	75.0128
Tardbp	TAR DNA binding protein	chr5:169088696-169098502	138.449	119.086	158.4	-0.217354	0.194218	-0.411572	0.469211	0.571095	0.120006	127.924	121.267	142.093	145.241	155.72	107.917	126.463	126.553	115.987	118.507	185.699	149.746	139.6	158.554
Arl4a	ADP-ribosylation factor-like 4A	chr6:69536686-69538697	117.797	118.455	155.969	0.00803467	0.404954	-0.396919	0.98614	0.108137	0.114471	121.387	114.366	128.441	97.9802	126.812	144.995	111.738	87.777	133.434	114.332	179.924	177.556	146.287	120.109
Hey2	hes-related family bHLH transcription factor with YRPW motif 2	chr1:30633674-30643762	102.456	118.376	120.698	0.208383	0.236405	-0.0280219	0.494378	0.462774	0.95327	130.181	91.447	85.8337	95.7947	109.022	131.248	126.771	105.152	97.1158	131.595	110.572	120.02	90.7988	161.402
Atp1a1	ATPase, Na+/K+ transporting, alpha 1 polypeptide	chr2:223111197-223478957	58.7463	118.197	78.6611	1.00863	0.421153	0.587476	0.000653095	0.114018	0.0198232	54.8754	54.5011	61.6224	61.4632	61.2695	138.212	115.628	113.395	87.1299	136.622	75.3578	85.5803	80.339	73.3674
RT1-CE16	RT1 class I, locus CE16	chr20:5857675-5878729	92.583	118.056	107.692	0.350652	0.218093	0.132558	0.153821	0.480888	0.719821	88.7245	94.0048	87.0657	87.7397	105.381	93.8958	124.55	139.758	118.904	113.172	93.9048	106.104	115.971	114.789
Gstm2	glutathione S-transferase mu 2	chr2:230247259-230251618	488.351	118.047	248.081	-2.04856	-0.977106	-1.07145	0.000653095	0.000653095	0.000653095	584.061	530.487	578.528	440.24	308.439	113.929	162.485	110.424	91.7443	111.653	309.73	152.304	201.88	328.411
Pmp22	peripheral myelin protein 22	chr10:49316999-49346994	147.999	117.93	108.284	-0.327647	-0.450768	0.12312	0.209782	0.07381	0.743614	163.182	160.967	138.402	126.425	151.018	117.527	116.836	136.51	103.115	115.665	109.307	80.2233	117.448	126.157
Nap1l1	nucleosome assembly protein 1-like 1	chr7:54238051-54261360	105.81	117.405	117.995	0.150018	0.157259	-0.00724169	0.643657	0.655699	0.988591	104.995	106.463	105.964	92.1181	119.508	104.013	128.068	117.932	132.768	104.242	122.297	122.439	108.25	118.996
Edf1	endothelial differentiation-related factor 1	chr3:2762581-2766887	158.309	117.191	154.527	-0.43389	-0.0348872	-0.399002	0.0520858	0.935427	0.113732	159.305	149.944	169.547	162.204	150.548	142.482	100.944	121.654	99.7135	121.16	177.036	139.055	141.345	160.672
Rps23	ribosomal protein S23	chr2:19699471-19701042	235.584	117.003	186.187	-1.0097	-0.339488	-0.670211	0.000653095	0.202584	0.00267407	220.303	240.691	239.017	271.463	206.448	110.076	149.853	110.213	107.783	107.089	248.09	155.642	139.963	201.056
Lix1l	Lix1 homolog (mouse)-like	chr2:218213051-218238921	130.021	116.84	118.959	-0.154213	-0.128288	-0.0259249	0.663652	0.743117	0.957934	147.932	130.109	118.424	135.006	118.635	135.191	122.107	120.224	86.3906	120.287	125.96	113.967	94.2749	141.632
Atp5j	ATP synthase, H+ transporting, mitochondrial Fo complex, subunit F6	chr11:27864651-27950063	124.219	116.287	139.706	-0.0951958	0.169515	-0.264711	0.91684	0.846761	0.73791	124.965	124.38	115.494	107.137	149.117	129.45	85.0301	139.728	125.89	101.335	154.389	144.997	141.963	117.475
Slit3	slit homolog 3 (Drosophila)	chr10:19801598-20392415	61.0481	116.274	89.1809	0.929506	0.546789	0.382717	0.000653095	0.0285474	0.207778	58.2609	62.5145	64.9429	61.3643	58.1577	113.373	116.576	139.298	76.6029	135.518	71.677	88.1337	91.0503	105.863
Actr3	ARP3 actin-related protein 3 homolog (yeast)	chr13:46808186-46850658	124.206	116.1	138.66	-0.0973736	0.158817	-0.256191	0.788917	0.655621	0.401197	130.344	132.26	131.616	121.551	105.262	118.859	124.034	116.791	101.089	119.727	141.533	147.104	140.785	125.22
Vimp	VCP-interacting membrane protein	chr1:128065928-128075694	90.8126	116.059	89.8258	0.353894	-0.0157621	0.369656	0.14132	0.973492	0.150582	90.2099	83.6145	86.2675	102.725	91.2457	137.034	109.03	120.053	98.07	116.107	89.7666	90.2541	79.0982	100.184
Cdc37	cell division cycle 37	chr8:22217095-22229971	130.668	115.76	143.817	-0.174763	0.138329	-0.313092	0.567232	0.699217	0.261705	122.637	130.412	134.041	132.493	133.755	108.657	122.015	123.873	109.088	115.168	130.377	129.866	160.761	154.263
Ddrgk1	DDRGK domain containing 1	chr3:129693707-129704956	115.292	115.57	110.298	0.00347606	-0.063875	0.0673511	0.995809	0.876781	0.871769	102.006	103.718	105.258	117.165	148.311	100.535	112.081	106.993	160.716	97.5243	118.386	104.595	103.948	114.265
Smoc1	SPARC related modular calcium binding 1	chr6:112880886-113037990	119.396	115.534	122.998	-0.0474301	0.0428783	-0.0903085	0.904349	0.919121	0.817835	107.239	120.972	131.721	114.202	122.846	111.777	89.2638	124.081	109.331	143.219	105.534	93.0999	141.58	151.777
Rabac1	Rab acceptor 1 (prenylated)	chr1:83095962-83099061	118.757	115.531	104.833	-0.0397317	-0.17993	0.140198	0.916884	0.571045	0.685103	123.885	120.675	125.246	131.198	92.7828	140.056	139.555	102.024	78.4853	117.537	120.418	90.9349	95.484	112.494
Hrc	histidine rich calcium binding protein	chr1:102388310-102391914	138.771	115.053	153.184	-0.270415	0.142555	-0.41297	0.3502	0.714219	0.128796	135.142	108.09	120.994	182.594	147.038	140.932	110.67	115.429	92.378	115.855	155.642	130.444	140.423	186.228
Eef2k	eukaryotic elongation factor-2 kinase	chr1:197723278-197765825	121.976	114.898	102.315	-0.0862475	-0.253579	0.167332	0.828284	0.424605	0.639309	170.155	133.032	92.894	146.159	67.6394	121.631	168.067	91.052	90.834	102.904	103.399	90.4642	91.0752	124.322
Gpx4	glutathione peroxidase 4	chr7:12686459-12689257	134.195	114.832	143.452	-0.224814	0.0962381	-0.321052	0.418773	0.80339	0.229776	117.596	138.865	131.497	143.992	139.026	119.618	104.216	101.612	127.293	121.419	156.779	140.268	162.383	114.38
Gtf2f1	general transcription factor IIF, polypeptide 1	chr9:9033677-9043040	126.574	114.532	114.382	-0.144228	-0.146122	0.00189481	0.657702	0.67806	0.996385	113.085	120.325	125.133	148.899	125.428	127.196	118.221	97.2978	113.657	116.29	113.351	116.537	106.696	120.943
Pgrmc2	progesterone receptor membrane component 2	chr2:147587582-147603481	109.742	114.436	114.748	0.06043	0.0643585	-0.00392857	0.879202	0.874704	0.994013	102.644	108.548	109.418	99.5605	128.538	108.13	108.111	115.602	148.412	91.9248	133.223	115.732	109.385	100.653
Tmed9	transmembrane emp24 protein transport domain containing 9	chr17:11668160-11672674	109.744	114.357	106.859	0.0594021	-0.0384366	0.0978386	0.878055	0.928477	0.7955	124.801	118.809	94.7647	109.139	101.206	143.093	104.371	124.68	80.5057	119.135	113.852	117.724	95.6271	100.232
2008-09-01	septin 8	chr10:38659244-38682851	125.216	114.31	105.458	-0.131468	-0.247739	0.116271	0.726115	0.45699	0.779073	115.713	121.648	122.733	148.4	117.584	122.581	114.711	123.119	84.0211	127.115	101.918	102.024	95.7037	122.188
Atp5j2	ATP synthase, H+ transporting, mitochondrial Fo complex, subunit F2	chr12:12819937-13740743	150.716	114.281	216.409	-0.399242	0.52193	-0.921173	0.821722	0.74158	0.548537	139.596	136.276	145.53	151.053	181.124	144.389	70.2023	112.714	129.449	114.65	239.869	199.334	285.3	141.131
Ifitm2	interferon induced transmembrane protein 2	chr1:220671381-220672562	90.5772	113.757	90.494	0.328732	-0.00132565	0.330057	0.194536	0.997185	0.215296	90.0249	93.9433	106.648	89.5819	72.6879	127.548	123.235	117.75	84.6616	115.589	91.776	102.324	81.1549	86.7212
Nbl1	neuroblastoma 1, DAN family BMP antagonist	chr5:161263764-161274897	96.5176	113.626	75.3196	0.235434	-0.357767	0.593201	0.409763	0.16714	0.010049	98.6332	108.437	104.576	80.1882	90.7535	127.884	133.422	126.229	74.7735	105.823	80.1208	72.3238	72.596	76.2377
Acadm	acyl-CoA dehydrogenase, C-4 to C-12 straight chain	chr2:278788484-278812656	241.543	113.526	418.17	-1.08926	0.791809	-1.88106	0.000653095	0.00752383	0.000653095	214.126	161.623	192.409	146.97	492.586	90.3676	82.6122	127.673	174.172	92.8054	492.33	342.147	603.255	234.946
Nedd8	neural precursor cell expressed, developmentally down-regulated 8	chr15:38230805-38242650	119.135	113.354	129.735	-0.0717668	0.122961	-0.194727	0.844889	0.730633	0.528351	106.289	111.837	118.421	139.717	119.412	124.848	112.907	112.893	98.6017	117.52	116.047	128.703	135.365	138.822
Cat	catalase	chr3:100021856-100054043	213.053	112.844	275.571	-0.916885	0.371214	-1.2881	0.000653095	0.251591	0.000653095	180.398	177.584	167.527	203.017	336.738	111.765	41.8528	112.404	213.064	85.1321	309.844	209.772	348.182	234.487
Upf3a	UPF3 regulator of nonsense transcripts homolog A (yeast)	chr16:81009175-81020604	124.909	112.448	111.107	-0.151628	-0.168927	0.0172998	0.6452	0.611514	0.970757	109.696	119.253	116.304	152.058	127.234	117.99	133.532	91.8161	116.587	102.313	107.735	116.265	105.243	115.186
Acsl1	acyl-CoA synthetase long-chain family member 1	chr16:48653022-48697521	121.076	112.147	258.698	-0.11052	1.09536	-1.20588	0.816396	0.000653095	0.000653095	107.757	79.2912	107.755	91.5302	219.045	71.5597	30.5952	122.292	262.501	73.7867	229.822	258.737	418.627	127.605
Cd48	Cd48 molecule	chr13:94737446-94760975	85.6559	112.059	104.142	0.387628	0.281929	0.105699	0.0926329	0.312054	0.777883	86.3322	87.6452	86.3983	86.5078	81.3962	109.147	115.736	113.298	113.29	108.822	96.106	110.289	111.338	98.836
Klf9	Kruppel-like factor 9	chr1:248193533-248218136	202.809	111.727	146.943	-0.86014	-0.464861	-0.395279	0.000653095	0.0980558	0.161758	258.915	214.382	204.366	219.928	116.455	97.1427	167.357	82.2201	123.423	88.494	182.783	116.241	124.58	164.169
Bst2	bone marrow stromal cell antigen 2	chr16:19800347-19803919	194.257	111.645	154.7	-0.799051	-0.32849	-0.470561	0.000653095	0.235773	0.0623831	206.866	189.15	202.133	166.245	206.889	126.316	70.8786	165.664	86.9913	108.372	217.788	141.35	142.34	117.322
Tmbim1	transmembrane BAX inhibitor motif containing 1	chr9:81327382-81400721	128.732	111.545	118.406	-0.206741	-0.120631	-0.0861092	0.733768	0.860785	0.908536	142.045	131.392	125.826	143.532	100.863	142.869	113.309	112.754	68.761	120.032	139.237	106.202	86.1828	142
Synpo2	synaptopodin 2	chr2:246617296-246771857	190.628	111.491	160.43	-0.773841	-0.24882	-0.525021	0.00121133	0.51107	0.0888732	188.252	208.61	176.274	196.104	183.902	91.102	182.122	89.765	102.147	92.3163	152.307	77.5928	166.171	245.648
Rab5b	RAB5B, member RAS oncogene family	chr7:3077233-3095997	142.076	111.467	139.317	-0.350049	-0.0282977	-0.321751	0.189887	0.952895	0.283079	155.802	140.996	139.112	143.461	131.009	110.851	136.026	107.031	105.827	97.5999	128.137	124.723	144.325	160.081
Dnajb2	DnaJ (Hsp40) homolog, subfamily B, member 2	chr9:82205718-82213929	178.42	111.408	176.151	-0.679422	-0.0184624	-0.660959	0.00121133	0.971543	0.00401415	156.848	203.441	190.23	191.932	149.648	131.157	107.299	105.707	98.2431	114.634	220.452	155.611	146.652	181.889
Ngfrap1	nerve growth factor receptor (TNFRSF16) associated protein 1	chrX:106309592-106310504	126.963	111.4	140.861	-0.188657	0.149866	-0.338523	0.529258	0.665015	0.209647	116.362	107.663	120.686	110.877	179.226	123.988	87.3874	114.282	124.569	106.774	142.36	116.252	144.605	160.227
Mll5	NA	chr4:8193463-8261291	103.989	110.669	98.0784	0.0898163	-0.0844249	0.174241	0.838141	0.857431	0.667525	105.336	103.951	99.5022	110.776	100.38	100.529	118.718	99.613	106.577	127.908	89.2601	95.7775	101.226	106.05
Pecam1	platelet/endothelial cell adhesion molecule 1	chr10:94598950-94660385	88.7695	110.622	64.6664	0.317502	-0.457046	0.774548	0.227137	0.0662584	0.000653095	76.2833	76.4168	88.9242	99.5945	102.629	94.7961	134.981	111.741	141.911	69.6798	74.5874	67.3138	69.1204	47.6442
Fus	fused in sarcoma	chr1:206435551-206449422	147.987	110.541	134.823	-0.420879	-0.134399	-0.28648	0.0770107	0.721714	0.316657	153.191	170.195	138.742	150.531	127.274	122.643	112.002	89.257	127.672	101.134	169.323	121.328	119.144	129.496
Nptn	neuroplastin	chr8:63149054-63301532	108.025	110.465	113.401	0.0322188	0.0700638	-0.037845	0.93802	0.870245	0.932733	124.709	106.654	104.668	102.371	101.725	120.74	121.499	119.951	88.0956	102.039	110.407	112.723	119.122	111.352
Tgm2	transglutaminase 2, C polypeptide	chr3:160977904-161007260	194.218	110.434	137.029	-0.814486	-0.503194	-0.311292	0.000653095	0.0711405	0.326499	208.234	191.564	191.939	191.045	188.306	116.728	142.819	92.412	105.655	94.5581	137.742	84.4761	143.633	182.263
Ap2m1	adaptor-related protein complex 2, mu 1 subunit	chr11:87113495-87119854	125.017	110.304	109.34	-0.180634	-0.193301	0.0126669	0.55386	0.552027	0.977595	133.488	129.505	133.651	130.631	97.811	111.157	118.23	125.16	83.7254	113.251	103.931	119.801	107.776	105.852
Pdia4	protein disulfide isomerase family A, member 4	chr4:142140945-142159845	90.7176	110.237	100.456	0.281151	0.147108	0.134043	0.297054	0.67745	0.726657	85.7542	89.1226	95.4036	82.7064	100.601	116.452	84.2209	144.021	82.7293	123.76	94.5499	104.969	94.5796	107.725
Pcnp	PEST proteolytic signal containing nuclear protein	chr11:50242374-50250544	99.494	110.039	113.785	0.145334	0.193631	-0.048297	0.657741	0.546223	0.908402	102.392	91.3766	101.49	110.589	91.6222	100.452	106.063	103.932	129.149	110.601	119.404	104.89	113.374	117.472
Zwint	ZW10 interacting kinetochore protein	chr20:19258271-19274206	133.409	110.014	113.553	-0.278172	-0.232491	-0.0456811	0.30013	0.449194	0.915753	127.765	148.257	149.94	138.003	103.08	120.855	137.301	94.9	93.5531	103.459	127.058	119.861	90.9828	116.31
Srsf2	serine/arginine-rich splicing factor 2	chr10:105451331-105454511	173.178	109.79	139.316	-0.657508	-0.313903	-0.343605	0.00121133	0.286995	0.209831	170.322	192.235	174.951	202.248	126.136	133.179	98.0601	96.0961	101.063	120.553	158.79	157.659	122.522	118.291
Cdk2ap1	cyclin-dependent kinase 2 associated protein 1	chr12:39538930-39549786	121.736	109.632	103.1	-0.151092	-0.239719	0.088627	0.627622	0.42453	0.817746	129.495	111.947	136.002	115.254	115.984	111.45	100.103	120.286	90.5242	125.795	104.563	128.496	84.8788	94.4617
Nme2	NME/NM23 nucleoside diphosphate kinase 2	chr10:81478177-81483679	124.936	109.616	133.632	-0.188732	0.0970736	-0.285805	0.511984	0.795467	0.29913	137.136	107.04	126.09	138.893	115.52	127.389	82.3908	127.039	103.598	107.664	139.912	158.639	139.389	96.5871
Fermt2	fermitin family member 2	chr15:23771815-23840399	144.204	109.573	148.975	-0.396216	0.0469574	-0.443174	0.127601	0.922014	0.10782	140.39	141.86	152.157	143.906	142.705	101.262	126.694	105.238	95.8031	118.868	157.468	122.14	156.772	159.518
Atp1b3	ATPase, Na+/K+ transporting, beta 3 polypeptide	chr8:103638323-103669634	78.9482	109.297	98.4131	0.46928	0.317944	0.151336	0.0383095	0.252101	0.662861	73.648	86.8123	77.8741	61.6014	94.8053	125.939	104.094	116.302	96.9208	103.231	109.247	127.546	83.6897	73.1698
Csda	NA	chr4:228170271-228193494	153.593	109.131	125.563	-0.493054	-0.290707	-0.202348	0.0371004	0.323122	0.535182	153.023	140.264	213.053	121.457	140.168	145.556	95.5103	97.2761	118.02	89.292	129.28	104.046	127.644	141.281
Selt	selenoprotein T	chr2:168183453-168198181	127.339	108.88	132.523	-0.225934	0.0575676	-0.283501	0.428526	0.892045	0.324015	139.213	118.974	111.187	135.206	132.117	118.928	113.742	107.949	100.859	102.924	145.607	112.269	120.016	152.201
Dynll1	dynein light chain LC8-type 1	chr12:48867515-48869889	153.164	108.728	182.659	-0.494357	0.254077	-0.748434	0.0301061	0.377662	0.00173202	163.264	126.601	160.952	155.973	159.03	96.6463	84.8362	137.625	79.8043	144.727	176.512	139.976	220.138	194.01
Otud5	OTU domain containing 5	chrX:16252446-16284933	130.881	108.681	103.521	-0.268158	-0.338329	0.0701708	0.353257	0.231371	0.870245	125.071	139.629	120.992	151.933	116.78	126.859	121.806	105.212	87.9242	101.604	115.977	99.1318	83.9739	115.003
Hspb7	heat shock protein family, member 7 (cardiovascular)	chr5:163688615-163692102	118.493	108.671	104.38	-0.124845	-0.182965	0.05812	0.748701	0.613634	0.890421	200.279	88.5089	99.8354	173.473	30.3709	154.732	128.007	81.2833	60.2247	119.106	109.939	116.937	80.9814	109.662
Ccdc47	coiled-coil domain containing 47	chr10:94139729-94158251	107.064	108.622	132.247	0.0208485	0.304763	-0.283915	0.962065	0.312565	0.363402	96.7871	113.731	98.0441	109.957	116.801	95.1062	108.037	110.268	124.335	105.365	135.207	119.679	138.574	135.529
Srp14	signal recognition particle 14	chr3:116791590-116795282	114.82	108.545	115.355	-0.0810874	0.00670473	-0.0877921	0.819004	0.988163	0.812447	114.662	112.717	112.686	109.834	124.204	117.204	104.586	110.23	104.764	105.941	128.431	103.21	110.396	119.384
Arf1	ADP-ribosylation factor 1	chr10:45319017-45334501	118.197	108.448	136.662	-0.124196	0.209415	-0.333611	0.710417	0.502748	0.210787	121.519	121.701	110.092	118.82	118.854	100.514	106.27	106.263	96.8201	132.371	108.286	119.465	162.829	156.068
Rcn1	reticulocalbin 1, EF-hand calcium binding domain	chr3:102026256-102040504	78.8117	108.398	72.9208	0.459864	-0.112079	0.571943	0.0575423	0.773626	0.0231739	85.0384	74.796	82.6148	76.0438	75.5653	138.505	80.3993	129.846	78.5032	114.739	69.6404	104.731	57.1468	60.1646
Arl1	ADP-ribosylation factor-like 1	chr7:29384787-29395708	118.664	108.233	128.154	-0.132737	0.110998	-0.243735	0.681012	0.758634	0.401155	123.807	116.421	125.219	107.142	120.731	103.543	99.6196	116.007	110.77	111.227	125.71	135.757	123.912	127.238
Lgals3bp	lectin, galactoside-binding, soluble, 3 binding protein	chr10:107050331-107059667	80.9789	108.141	50.7827	0.417296	-0.673209	1.09051	0.0837285	0.00121133	0.000653095	89.8653	73.1496	101.834	76.1181	63.9275	139.494	74.5131	141.576	72.8752	112.247	47.8699	54.398	51.4904	49.3725
Ndufv3	NADH dehydrogenase (ubiquinone) flavoprotein 3	chr20:12455138-12464610	137.145	107.606	176.334	-0.349951	0.362604	-0.712555	0.188007	0.194536	0.00484629	127.916	113.222	124.121	126.672	193.796	80.3157	87.9856	94.9517	187.918	86.8576	188.335	167.358	229.454	120.189
Ndfip1	Nedd4 family interacting protein 1	chr18:31252997-31303452	110.773	107.482	107.593	-0.0435098	-0.0420161	-0.00149376	0.912703	0.923494	0.996979	122.73	124.269	116.122	93.7998	96.9408	119.876	105.641	104.666	100.199	107.027	114.104	108.811	85.7475	121.709
Suclg1	succinate-CoA ligase, alpha subunit	chr4:165937921-165967277	182.047	107.046	270.648	-0.766082	0.572108	-1.33819	0.000653095	0.0237049	0.000653095	156.359	140.184	156.494	155.845	301.352	93.9454	72.929	99.4596	172.325	96.5702	325.569	236.277	370.291	150.455
Sqstm1	sequestosome 1	chr10:35463171-35474738	93.1271	106.88	96.8594	0.198721	0.056691	0.14203	0.514288	0.897282	0.693543	95.813	111.681	93.6196	88.0295	76.4924	99.0533	117.223	101.561	107.072	109.492	96.787	91.7519	98.692	100.207
Htatsf1	HIV-1 Tat specific factor 1	chrX:154143842-154158071	144.637	106.746	130.072	-0.438243	-0.153126	-0.285117	0.08229	0.687475	0.360617	137.986	150.925	142.771	148.434	143.067	117.601	99.0424	101.822	114.469	100.799	174.246	112.378	96.9815	136.682
Kdelr1	KDEL (Lys-Asp-Glu-Leu) endoplasmic reticulum protein retention receptor 1	chr1:102938309-102949196	121.672	106.69	93.7724	-0.189569	-0.375764	0.186196	0.524849	0.154152	0.567254	135.015	116.478	119.896	134.629	102.343	147.175	91.1996	97.0635	89.5128	108.501	100.31	112.173	79.3601	83.2463
Aco2	aconitase 2, mitochondrial	chr7:123077887-123120997	175.862	106.442	357.026	-0.724377	1.02158	-1.74596	0.00563845	0.000653095	0.000653095	161.103	115.965	149.477	131.651	321.115	74.576	55.7831	119.919	185.825	96.108	338.501	315.899	588.256	185.45
Hdgf	hepatoma-derived growth factor	chr2:206679008-206687530	105.135	106.391	107.359	0.0171269	0.0301929	-0.013066	0.969621	0.947334	0.977591	117.673	88.103	101.421	111.982	106.498	103.699	110.164	113.994	101.506	102.59	105.632	114.221	100.464	109.118
Zeb1	zinc finger E-box binding homeobox 1	chr17:52353063-52373420	128.911	106.31	127.938	-0.278087	-0.0109264	-0.267161	0.336808	0.982094	0.402849	102.226	128.054	123.536	142.229	148.508	111.785	129.518	92.2141	89.6892	108.346	134.691	105.181	109.855	162.024
Ckap4	cytoskeleton-associated protein 4	chr7:25084904-25093002	76.6767	106.117	68.7006	0.468799	-0.158465	0.627264	0.0474859	0.643657	0.0117172	76.4974	58.6224	76.8467	93.4426	77.9742	158.115	77.2864	115.558	62.0508	117.576	62.1816	80.9973	54.0904	77.5332
Lbh	limb bud and heart development	chr6:34010477-34031267	114.053	105.857	105.055	-0.107587	-0.118555	0.0109678	0.771248	0.758717	0.98137	93.7594	142.35	141.624	123.101	69.4289	121.641	116.282	117.641	77.3436	96.376	103.881	126.058	94.4964	95.7852
Sync	syncoilin, intermediate filament protein	chr5:151209093-151231142	151.303	105.661	154.868	-0.518	0.0335926	-0.551592	0.0285474	0.947236	0.0277786	140.188	148.293	141.125	210.844	116.067	108.067	107.468	103.526	73.3959	135.849	167.001	105.319	125.33	221.822
Zmat2	zinc finger, matrin type 2	chr18:29343456-29348092	132.362	105.62	128.468	-0.325605	-0.0430831	-0.282521	0.199045	0.922071	0.324079	130.17	135.713	127.606	117.235	151.088	116.019	106.177	99.1768	99.4337	107.297	150.884	117.277	108.273	137.438
Mef2d	myocyte enhancer factor 2D	chr2:206915180-206941044	76.1135	105.6	97.8477	0.472381	0.362387	0.109994	0.0356358	0.186816	0.78158	83.7798	74.5512	66.6674	74.4475	81.1215	83.5778	127.286	107.607	90.9422	118.585	70.4183	73.5788	101.662	145.732
Clic4	chloride intracellular channel 4	chr5:157338298-157394464	101.52	105.295	119.002	0.0526791	0.229232	-0.176553	0.892749	0.445473	0.59084	107.876	110.957	109.587	97.7873	81.3902	91.9704	132.666	102.07	77.8525	121.916	99.528	97.8565	136.786	141.839
Uaca	uveal autoantigen with coiled-coil domains and ankyrin repeats	chr8:65436327-65524224	91.2768	105.267	83.0416	0.20573	-0.136413	0.342144	0.538622	0.7293	0.272221	90.5924	99.5661	80.8541	96.8169	88.5544	90.7754	167.342	77.6712	100.032	90.5126	80.4044	69.9528	76.5221	105.287
Atp6v1f	ATPase, H transporting, lysosomal V1 subunit F	chr4:56511723-56514818	118.592	105.043	119.241	-0.175034	0.00787308	-0.182907	0.567224	0.986601	0.573683	133.632	112.673	137.546	111.945	97.165	116.019	125.97	99.2604	80.9598	103.003	141.524	112.401	107.723	115.317
G6pd	glucose-6-phosphate dehydrogenase	chr1:152015531-152034676	79.9035	104.891	107.896	0.392559	0.433315	-0.0407556	0.118428	0.0971263	0.927429	88.0497	77.8601	87.1843	77.1455	69.278	136.231	89.0314	103.004	73.8125	122.375	113.781	123.642	113.623	80.5391
Mprip	myosin phosphatase Rho interacting protein	chr10:45775201-45890067	101.372	104.797	101.515	0.047931	0.00203567	0.0458953	0.912551	0.996385	0.921602	111.904	101.794	89.5688	109.99	93.6035	96.8139	128.193	105.472	86.8128	106.692	94.3603	102.31	105.143	104.248
Htra3	HtrA serine peptidase 3	chr14:79875404-79903558	78.2074	104.775	54.3217	0.421924	-0.525777	0.947701	0.0824475	0.0303398	0.000653095	63.4065	82.9063	94.9997	55.2945	94.43	109.474	111.863	131.388	83.8127	87.3394	56.1632	42.587	39.6809	78.8557
Tmem109	transmembrane protein 109	chr1:233990663-234001238	104.46	104.75	100.829	0.0040052	-0.0510299	0.0550351	0.993222	0.904337	0.897282	106.056	97.3197	113.13	108.596	97.1959	126.056	101.091	106.053	79.7538	110.797	105.768	91.5365	98.0401	107.973
Tram1	translocation associated membrane protein 1	chr5:10062170-10138210	84.2388	104.581	85.0795	0.31206	0.0143269	0.297733	0.241039	0.974649	0.309725	98.6326	76.3822	90.7572	79.3799	76.042	117.867	96.578	109.841	86.2804	112.337	78.6327	93.4211	76.2945	91.9697
G0s2	G0/G1switch 2	chr13:116559386-116560299	98.3964	104.523	263.216	0.0871437	1.41957	-1.33243	0.836106	0.000653095	0.000653095	110.79	100.945	73.0735	81.0453	126.128	66.9413	21.078	63.6557	273.62	97.3207	278.109	337.215	361.511	76.0304
Vat1	vesicle amine transport 1	chr10:89164913-89172532	114.368	104.449	101.997	-0.130874	-0.165147	0.0342729	0.709455	0.63839	0.938538	110.736	115.73	131.825	111.456	102.092	114.037	109.674	97.8002	87.0847	113.651	89.5707	105.345	100.676	112.398
Atp2a2	ATPase, Ca++ transporting, cardiac muscle, slow twitch 2	chr12:41434650-41482924	218.705	104.323	165.533	-1.06792	-0.401869	-0.666056	0.000653095	0.240849	0.0135771	223.539	248.473	215.077	222.527	183.909	97.7272	107.428	120.291	87.5675	108.603	141.996	156.079	181.704	182.353
Tmsb10	thymosin, beta 10	chr4:165645782-165646842	28.5555	104.252	38.1644	1.86823	0.41846	1.44977	0.000653095	0.221169	0.000653095	23.5758	30.5183	17.2851	27.0899	44.3083	99.5034	39.4085	82.3913	221.679	78.2751	23.0677	47.9037	52.3291	29.3571
Pqlc3	PQ loop repeat containing 3	chr6:52010001-52021578	66.9176	103.973	74.4208	0.635751	0.15332	0.48243	0.00441716	0.653905	0.0518797	68.4362	66.7735	75.6169	72.2501	51.5111	140.292	94.2952	101.78	65.1017	118.395	70.7907	81.611	63.5644	81.7169
Eif4h	eukaryotic translation initiation factor 4H	chr12:27093545-27110202	125.588	103.908	123.174	-0.273393	-0.028008	-0.245385	0.32762	0.950703	0.430891	122.521	123.834	118.987	134.46	128.139	107.043	119.472	100.199	95.6941	97.1328	131.251	112.914	120.435	128.095
Akr1b1	aldo-keto reductase family 1, member B1 (aldose reductase)	chr4:61426189-61440279	99.2516	103.519	94.1756	0.0607271	-0.0757375	0.136465	0.871712	0.847512	0.70296	103.747	100.328	107.524	100.102	84.5567	129.065	93.315	112.755	74.6875	107.769	109.914	93.0534	86.5122	87.2224
Mtch1	mitochondrial carrier 1	chr20:9177062-9200859	107.69	103.394	105.568	-0.0587289	-0.0287059	-0.030023	0.88005	0.949383	0.947973	105.896	100.81	107.665	106.58	117.496	100.424	108.405	109.237	103.555	95.3475	105.075	109.274	118.44	89.4829
Psmd4	proteasome (prosome, macropain) 26S subunit, non-ATPase, 4	chr2:215692986-215702247	117.285	103.27	113.545	-0.183601	-0.0467608	-0.13684	0.536093	0.915365	0.694445	109.249	107.746	123.037	135.843	110.552	116.897	90.9367	103.624	98.3246	106.568	117.644	111.794	119.979	104.762
Banf1	barrier to autointegration factor 1	chr1:227673525-227675555	169.997	103.122	185.531	-0.72116	0.126151	-0.847311	0.000653095	0.72462	0.000653095	167.954	148.98	152.843	206.298	173.909	136.092	85.3248	93.7985	89.1634	111.23	212.081	175.911	180.308	173.823
Tra2a	transformer 2 alpha homolog (Drosophila)	chr4:143594599-143613358	126.401	103.086	112.02	-0.294157	-0.174245	-0.119911	0.268523	0.611293	0.7508	112.386	142.653	127.465	144.373	105.127	105.963	102.71	101.052	104.884	100.821	147.815	110.772	98.3336	91.16
Tgfb1	transforming growth factor, beta 1	chr1:83742150-83758472	39.3904	102.924	46.8761	1.38566	0.251008	1.13465	0.000653095	0.409133	0.000653095	45.5783	35.2476	40.5145	44.1819	31.4299	112.821	70.2158	118.203	59.5802	153.799	38.3951	78.2531	35.2605	35.5958
Anxa4	annexin A4	chr4:183108903-183164898	142.259	102.87	130.567	-0.467697	-0.123733	-0.343964	0.0437631	0.74158	0.209729	140.797	142.978	154.416	132.408	140.695	110.188	91.2816	105.649	85.2654	121.966	143.046	121.129	118.577	139.516
Gem	GTP binding protein overexpressed in skeletal muscle	chr5:30050663-30062666	158.815	102.753	140.588	-0.628176	-0.175875	-0.452301	0.00789002	0.62965	0.0764642	267.833	129.958	143.286	119.474	133.525	95.7795	137.913	110.735	73.8887	95.4467	138.824	99.8257	144.761	178.942
Tspyl2	TSPY-like 2	chrX:64168074-64173685	111.197	102.723	93.9177	-0.114365	-0.243651	0.129286	0.751731	0.437681	0.736157	112.233	110.97	104.522	133.624	94.6367	118.785	116.578	94.094	85.0333	99.124	107.271	97.1385	70.5695	100.692
Cd99	CD99 molecule	chr20:57779371-57783907	122.29	101.996	102.303	-0.261793	-0.257459	-0.00433398	0.332024	0.369022	0.992578	123.449	124.421	113.77	128.814	120.995	132.924	101.935	81.8353	81.5471	111.738	105.301	113.241	98.1375	92.5311
Antxr1	anthrax toxin receptor 1	chr4:183514050-183699805	63.8137	101.876	72.0163	0.674869	0.174456	0.500413	0.00221111	0.618652	0.0531198	58.8017	64.0031	81.212	54.4678	60.584	89.6618	100.028	112.272	87.3553	120.061	60.7125	56.2483	73.0512	98.053
Srrm1	serine/arginine repetitive matrix 1	chr5:157444416-157476909	130.497	101.754	113.76	-0.35893	-0.198028	-0.160902	0.177102	0.569957	0.668406	123.284	132.946	119.019	152.403	124.834	95.1458	103.629	90.421	112.191	107.385	117.554	93.03	109.358	135.098
Spcs1	signal peptidase complex subunit 1 homolog (S. cerevisiae)	chr16:7008971-7010540	103.487	101.615	106.732	-0.0263267	0.0445448	-0.0708715	0.949383	0.91684	0.857992	106.924	81.2843	114.363	106.944	107.918	113.979	69.4017	100.588	109.044	115.064	105.977	135.11	98.7973	87.042
Reep5	receptor accessory protein 5	chr18:26842000-26873146	134.112	101.504	146.084	-0.401905	0.123356	-0.525261	0.116712	0.760629	0.0424125	138.043	112.87	126.677	123.37	169.603	105.701	85.4155	113.174	102.212	101.019	148.135	136.432	172.351	127.42
Clec11a	C-type lectin domain family 11, member A	chr1:101355484-101358626	43.8626	100.303	28.3768	1.19331	-0.628279	1.82158	0.000653095	0.00484629	0.000653095	40.7952	41.4384	52.3001	30.8889	53.8902	109.485	55.1884	162.974	81.2002	92.6682	31.1736	17.7251	31.5311	33.0773
Anxa11	annexin A11	chr16:3260476-4228653	118.785	100.045	107.273	-0.247705	-0.147071	-0.100634	0.574035	0.773626	0.862877	128.278	115.189	122.862	125.204	102.392	113.009	108.467	94.7979	81.3764	102.575	115.472	91.8435	96.0349	125.74
Sf1	splicing factor 1	chr1:228723305-228736877	116.304	99.8789	107.755	-0.219645	-0.110139	-0.109506	0.488212	0.784305	0.780024	103.464	123.994	115.014	130.944	108.103	81.9889	109.947	93.0715	111.751	102.636	100.518	100.499	123.458	106.547
Mesdc2	mesoderm development candidate 2	chr1:146966068-146971740	91.1775	99.759	92.4544	0.129769	0.0200639	0.109705	0.699149	0.964978	0.772787	92.8035	85.5174	93.9594	86.7656	96.8419	115.123	100.279	99.2527	83.8784	100.262	91.977	86.4583	88.0347	103.348
Luc7l3	LUC7-like 3 (S. cerevisiae)	chr10:81823960-81859932	115.367	99.5101	105.314	-0.213311	-0.131536	-0.0817755	0.495547	0.740005	0.84568	99.4956	110.776	102.757	144.587	119.218	106.99	110.866	81.3554	106.685	91.6532	126.502	84.6577	81.2185	128.876
Shisa5	shisa family member 5	chr8:117145033-117147665	82.0763	99.4336	70.1578	0.276768	-0.226362	0.50313	0.288751	0.44751	0.0339158	90.0484	74.466	80.8105	77.5761	87.4804	119.028	89.4884	109.381	71.4449	107.825	65.0259	83.6509	63.6581	68.2963
Psmc3	proteasome (prosome, macropain) 26S subunit, ATPase 3	chr3:86585690-86591069	91.1324	99.4203	104.346	0.125575	0.195343	-0.0697681	0.708928	0.539775	0.8631	93.5552	90.2967	81.0208	99.7007	91.0886	109.872	93.1809	103.898	89.0322	101.118	105.486	104.93	105.006	101.963
Rps27	ribosomal protein S27	chr2:209004971-209006077	107.529	99.3557	85.8126	-0.114055	-0.325468	0.211413	0.760761	0.274915	0.539654	115.118	110.468	116.131	100.265	95.6635	97.3458	104.923	82.8899	102.345	109.275	90.8516	68.725	76.3303	107.343
RGD1311703	similar to sid2057p	chr1:192525000-192536714	124.452	99.2649	122.193	-0.32624	-0.0264286	-0.299811	0.188007	0.953483	0.274203	120.06	125.173	136.699	116.297	124.033	94.5358	114.355	93.9732	100.822	92.6386	127.106	109.558	114.849	137.26
Cox7b	cytochrome c oxidase subunit VIIb	chrX:55629810-57548519	131.986	99.0971	229.444	-0.413465	0.797762	-1.21123	0.535789	0.0973315	0.0329369	153.039	119.526	102.839	108.259	176.265	72.8923	44.2274	107.959	165.827	104.58	252.254	211.544	321.422	132.556
Cyb5r1	cytochrome b5 reductase 1	chr13:56286701-56293107	131.341	99.087	97.3849	-0.406545	-0.431542	0.024997	0.104492	0.112156	0.956671	172.042	173.969	155.36	68.0565	87.275	126.934	118.274	91.8561	73.7929	84.5782	144.541	78.5901	69.8702	96.538
Tsc22d3	TSC22 domain family, member 3	chr3:52711811-52715433	56.7409	99.0715	47.8994	0.804079	-0.244383	1.04846	0.000653095	0.424716	0.000653095	95.6858	46.8028	62.1154	46.8765	32.2242	78.962	135.827	92.6509	115.727	72.1905	48.5941	45.4637	63.1755	34.3643
Sh3bgrl3	SH3 domain binding glutamic acid-rich protein-like 3	chr5:156043498-156044872	63.8026	99.0665	61.4377	0.634781	-0.0544917	0.689273	0.00121133	0.897282	0.00121133	66.0867	63.0437	68.0145	65.9906	55.8776	123.926	87.3	115.569	61.0933	107.444	72.1057	79.011	44.8186	49.8153
Dcxr	dicarbonyl L-xylulose reductase	chr10:109499388-109501278	218.09	98.9518	146.986	-1.14013	-0.569241	-0.570886	0.000653095	0.0135771	0.0123316	219.084	204.353	210.667	265.478	190.869	98.1895	125.296	100.494	67.7122	103.067	152.03	89.2135	161.763	184.94
Cdc42	cell division cycle 42 (GTP binding protein)	chr5:159177936-159528921	118.333	98.7201	118.497	-0.261442	0.00199554	-0.263437	0.326373	0.996232	0.357077	126.623	124.65	126.321	111.773	102.3	88.6621	103.381	95.1832	99.5155	106.858	106.923	130.778	114.571	121.717
Ier3	immediate early response 3	chr20:5535615-5536820	47.0472	98.5478	34.4378	1.06672	-0.450115	1.51683	0.000653095	0.10507	0.000653095	73.5574	35.9346	50.2644	46.5807	28.8988	134.671	46.0343	122.028	86.8674	103.139	24.6195	63.0918	18.6707	31.3692
Smim14	small integral membrane protein 14	chr14:44233182-44276794	87.7244	98.4331	90.8084	0.166165	0.0498473	0.116318	0.576048	0.904562	0.748729	91.0233	87.167	90.1271	89.5272	80.7776	113.678	95.5982	97.5091	76.6572	108.723	89.8353	102.727	84.9996	85.6716
Slc38a2	solute carrier family 38, member 2	chr7:137716130-137728300	81.205	98.3882	90.4407	0.276916	0.155403	0.121513	0.356933	0.683744	0.772559	87.4051	91.1867	85.1194	84.2243	58.0896	85.6833	147.122	86.0921	86.0279	87.016	75.7081	124.337	93.5597	68.1581
Haus7	HAUS augmin-like complex, subunit 7	chr1:153101813-153120878	52.9033	98.3593	48.8738	0.894704	-0.114295	1.009	0.000653095	0.757952	0.000653095	45.6252	59.612	42.8944	62.183	54.2018	167.807	59.6104	90.2813	57.0945	117.003	51.4251	68.9643	32.8273	42.2785
Kctd10	potassium channel tetramerization domain containing 10	chr12:49784214-49801889	95.8453	98.2074	99.6099	0.0351236	0.0555813	-0.0204577	0.933261	0.897282	0.966548	96.7146	88.3727	95.1542	102.955	96.0295	107.858	126.966	90.6449	67.7261	97.8417	117.757	99.7047	84.2934	96.6846
Ctsk	cathepsin K	chr2:216154167-216164779	29.9517	98.184	29.9529	1.71285	5.92781e-05	1.71279	0.000653095	0.998905	0.000653095	33.1854	30.2758	34.5458	21.4699	30.2814	110.309	90.176	124.768	68.1757	97.4915	30.2053	39.0428	23.1829	27.3806
Rps7	ribosomal protein S7	chr6:56601560-56606425	116.141	98.1087	101.624	-0.243421	-0.192627	-0.0507944	0.377259	0.540684	0.904349	117.088	135.232	119.795	99.2556	109.333	85.4083	86.6939	91.5829	122.311	104.548	101.192	81.0387	115.743	108.524
Hdlbp	high density lipoprotein binding protein	chr9:100209415-100277671	86.4599	98.0846	97.1536	0.181996	0.168236	0.01376	0.585896	0.650576	0.978024	87.8185	76.3958	85.2697	95.0117	87.8035	87.2581	99.5715	105.036	87.9917	110.566	85.0956	92.7083	114.044	96.7658
Fam96b	family with sequence similarity 96, member B	chr19:545967-547833	100.403	97.9307	105.258	-0.0359626	0.0681344	-0.104097	0.929782	0.866865	0.780845	104.632	91.7292	97.6451	116.431	91.5753	112.776	98.6114	92.4271	72.6456	113.193	104.562	111.071	106.567	98.8324
Serinc1	serine incorporator 1	chr20:40703832-40722871	86.2033	97.9053	90.2623	0.183643	0.0663812	0.117262	0.552331	0.878585	0.756007	91.326	95.9264	93.2973	73.8639	76.6028	84.4345	113.3	86.1508	107.759	97.8828	85.2912	101.139	85.8474	88.7716
Sptbn1	spectrin, beta, non-erythrocytic 1	chr14:114188053-114356233	77.8098	97.8742	85.6617	0.330976	0.138698	0.192278	0.275076	0.73919	0.619863	69.1965	84.1602	72.8712	72.6029	90.2182	65.3245	115.076	98.3954	119.264	91.3109	76.0114	80.7261	99.4375	86.4717
Slc48a1	solute carrier family 48 (heme transporter), member 1	chr7:139463279-139471081	92.6553	97.8304	83.8299	0.0784089	-0.144408	0.222817	0.829249	0.675213	0.462571	100.74	87.4784	90.7195	92.449	91.8891	104.631	100.961	103.942	73.7375	105.88	84.5362	77.2824	84.6151	88.8861
Ociad1	OCIA domain containing 1	chr14:37276459-37293850	140.922	97.5726	128.141	-0.530349	-0.137162	-0.393188	0.0126641	0.700387	0.121711	151.407	142.993	148.35	133.025	128.835	102.269	103.714	103.199	83.8166	94.8643	156.691	121.963	116.814	117.097
Chmp5	charged multivesicular body protein 5	chr5:61798641-61815785	75.5927	97.553	92.295	0.36794	0.288006	0.0799332	0.121337	0.302458	0.836106	74.3889	70.7938	67.6294	72.7652	92.3861	92.9048	113.966	101.708	95.4596	83.7267	98.7423	100.42	83.1997	86.8178
Atp5c1	ATP synthase, H+ transporting, mitochondrial F1 complex, gamma polypeptide 1	chr17:73895078-73917256	133.792	97.543	181.922	-0.455885	0.443328	-0.899213	0.0508982	0.0815942	0.000653095	134.9	128.67	121.419	98.523	185.449	89.7816	64.5939	108.63	145.109	79.6002	204.537	159.026	237.643	126.484
Ccdc104	coiled-coil domain containing 104	chr14:113294059-113319546	113.269	97.5221	92.7045	-0.215955	-0.289045	0.0730905	0.443754	0.298952	0.857393	115.593	117.754	106.02	106.869	120.109	103.418	94.9306	100.257	102.236	86.7692	109.202	85.6207	88.2607	87.7343
Atp6v1e1	ATPase, H+ transporting, lysosomal V1 subunit E1	chr4:220441645-220463691	65.908	97.4884	74.5358	0.564777	0.177481	0.387296	0.00677966	0.583743	0.128221	66.4091	66.0998	65.3186	56.7758	74.9367	88.515	127.868	96.414	86.495	88.1503	79.2509	66.2606	81.3246	71.3073
Tmem50a	transmembrane protein 50A	chr5:157006368-157021310	86.0809	97.4687	77.467	0.179246	-0.152111	0.331358	0.543475	0.646448	0.206254	96.5212	86.9675	84.7741	80.0476	82.0942	122.426	102.381	89.1552	79.8487	93.5325	85.4796	84.9789	65.2023	74.2071
Cdk11b	cyclin-dependent kinase 11B	chr5:176527549-176553762	97.8224	97.3449	104.591	-0.00705832	0.0965262	-0.103584	0.988347	0.809221	0.789746	88.4333	93.7831	72.9033	119.901	114.091	102.812	107.735	79.2232	109.504	87.4501	108.157	92.58	104.202	113.426
Irf3	interferon regulatory factor 3	chr1:102048989-102061802	87.0802	97.222	69.1365	0.158938	-0.332898	0.491836	0.626984	0.217721	0.0465043	74.0278	85.8168	83.0304	111.677	80.8492	125.692	92.906	82.3208	69.2087	115.983	78.9868	67.2506	58.7998	71.5087
Cox8a	cytochrome c oxidase subunit VIIIa	chr1:229457143-229459465	141.018	97.1533	178.477	-0.537543	0.339856	-0.877399	0.0135771	0.199597	0.000653095	163.889	131.584	131.856	137.172	140.589	104.516	82.5068	99.029	108.851	90.8638	200.238	145.78	233.521	134.366
Fkbp1a	FK506 binding protein 1a	chr3:153399454-153418857	82.8258	97.1088	86.9773	0.229523	0.0705591	0.158964	0.412192	0.858168	0.632255	95.8505	75.6731	82.0149	84.7679	75.8224	115.366	99.3367	100.569	74.2989	95.973	83.4605	108.868	83.4303	72.1502
Akap8l	A kinase (PRKA) anchor protein 8-like	chr7:14494264-14523993	102.92	96.8389	73.566	-0.0878616	-0.484409	0.396547	0.812894	0.0465043	0.122349	75.3522	114.583	94.5043	118.878	111.281	103.168	107.273	85.4357	91.3858	96.9322	89.2975	68.0963	60.0537	76.8166
Hip1	huntingtin interacting protein 1	chr12:26178239-26312676	60.7387	96.7902	93.5748	0.672245	0.623503	0.0487418	0.0063956	0.0256739	0.92916	51.8293	64.5309	63.6981	68.444	55.1915	99.6889	139.96	78.5089	62.2394	103.554	85.6158	73.8309	66.3359	148.517
Dkc1	dyskeratosis congenita 1, dyskerin	chr1:151564353-151578635	121.782	96.7739	105.16	-0.33161	-0.21171	-0.1199	0.195015	0.50893	0.742562	84.7806	126.424	107.206	161.077	129.422	109.286	99.033	78.5146	97.516	99.5203	117.505	108.865	92.2453	102.027
Klf6	Kruppel-like factor 6	chr17:69624950-69633946	116.283	96.5008	129.214	-0.269032	0.15212	-0.421153	0.379752	0.709554	0.162327	129.041	139.002	119.58	100.007	93.7879	97.8799	136.327	70.0831	85.727	92.4875	101.137	187.009	134.302	94.41
Tubb4b	tubulin, beta 4B class IVb	chr3:2416279-2425631	71.9833	96.4721	110.915	0.42245	0.623716	-0.201266	0.0766767	0.00822323	0.532436	82.4983	66.5104	57.0074	69.1681	84.7323	126.965	70.4833	107.596	68.6026	108.714	108.586	139.757	97.426	97.889
Supt5h	suppressor of Ty 5 homolog (S. cerevisiae)	chr1:86651789-86680454	107.519	96.2842	100.274	-0.159219	-0.100639	-0.0585802	0.630341	0.808994	0.895747	95.7157	107.461	102.178	122.718	109.521	95.0516	100.265	91.4341	92.7885	101.882	104.059	83.317	95.4358	118.285
Smarca2	SWI/SNF related, matrix associated, actin dependent regulator of chromatin, subfamily a, member 2	chr1:251867336-252035194	189.431	96.0661	157.978	-0.979572	-0.261944	-0.717628	0.000653095	0.490807	0.00484629	180.994	195.821	164.182	206.77	199.388	96.4337	84.7202	101.159	99.2472	98.7705	166.76	124.732	151.621	188.801
Psmc1	proteasome (prosome, macropain) 26S subunit, ATPase, 1	chr6:133350577-133362938	93.51	95.9571	103.682	0.0372687	0.148966	-0.111697	0.92551	0.667706	0.759864	102.062	84.1677	89.8287	97.3773	94.1145	95.7696	87.2109	99.0546	95.9669	101.784	107.236	105.313	109.099	93.0777
Ubxn4	UBX domain protein 4	chr13:50042177-50074666	95.511	95.9054	99.592	0.00594448	0.0603619	-0.0544174	0.989485	0.885439	0.900728	86.921	102.879	94.643	98.8779	94.2347	107.098	91.9172	88.6854	95.5767	96.2497	105.328	79.9693	92.6763	120.394
Nudt4	nudix (nucleoside diphosphate linked moiety X)-type motif 4	chr7:36695608-36711834	49.4613	95.7105	62.0264	0.952377	0.326582	0.625795	0.000653095	0.238315	0.0063956	56.1872	43.9858	54.9459	50.7816	41.406	99.8179	105.859	103.087	74.3558	95.4326	63.7721	83.1934	47.0182	54.1218
Oaz2	ornithine decarboxylase antizyme 2	chr8:70899390-70913165	93.2378	95.4967	101.175	0.0345362	0.117865	-0.083329	0.931723	0.74789	0.834892	96.7424	90.4601	88.4404	101.749	88.7975	113.71	100.476	88.9781	78.4604	95.859	119.054	114.478	90.7601	80.4071
Plekhb2	pleckstrin homology domain containing, family B (evectins) member 2	chr9:41017134-41049780	100.885	95.297	110.094	-0.0822152	0.126023	-0.208238	0.830039	0.747281	0.538869	102.105	92.6202	95.5129	120.015	94.1741	97.1784	121.458	89.6537	72.6143	95.5805	110.588	100.015	115.707	114.067
Tmed10	transmembrane emp24-like trafficking protein 10 (yeast)	chr6:116347951-116383217	69.7899	95.2098	77.9327	0.448093	0.159211	0.288882	0.0459174	0.630719	0.296947	76.6413	71.9649	72.658	58.5371	69.148	101.7	91.6728	107.071	74.7925	100.812	74.3315	84.7858	63.4742	89.1392
Hsbp1	heat shock factor binding protein 1	chr19:62733735-62738068	128.138	94.9738	108.841	-0.4321	-0.235481	-0.196619	0.0558982	0.426686	0.531176	145.856	114.724	132.666	118.947	128.499	107.845	90.9064	92.2429	80.6637	103.211	123.482	105.748	100.977	105.156
Myo1c	myosin IC	chr10:64185627-64201933	99.6052	94.973	87.567	-0.068703	-0.185834	0.117131	0.865583	0.599137	0.764873	103.737	105.291	97.655	111.595	79.7477	96.6442	110.563	92.0272	72.682	102.949	68.5694	92.5584	91.1313	98.0087
Sdpr	serum deprivation response	chr9:54940737-54952755	209.112	94.9092	164.235	-1.13966	-0.348519	-0.791138	0.000653095	0.233215	0.000653095	218.152	192.523	193.007	210.165	231.715	84.5937	73.5903	99.071	155.693	61.5979	191.352	127.697	172.697	165.192
Pgam1	phosphoglycerate mutase 1 (brain)	chr1:268610732-268618280	97.1111	94.8593	134.61	-0.0338476	0.471074	-0.504921	0.937163	0.0610726	0.0413122	109.831	85.3867	99.4544	82.0064	108.877	105.526	81.9408	102.241	95.6036	88.9851	138.584	127.863	168.585	103.407
Vwa1	von Willebrand factor A domain containing 1	chr5:176692349-176697535	33.9785	94.7476	52.7053	1.47947	0.633326	0.846141	0.000653095	0.00601445	0.000653095	31.0535	28.8334	28.3633	45.5073	36.135	122.097	118.279	89.9913	59.7863	83.5848	59.4927	60.1601	39.4555	51.713
Rbpms2	RNA binding protein with multiple splicing 2	chr8:70852851-70883670	128.622	94.7043	127.387	-0.441633	-0.0139198	-0.427714	0.064735	0.976273	0.0994981	125.406	125.626	127.157	156.862	108.058	114.074	124.42	87.6343	67.3048	80.0883	127.957	138.515	132.469	110.607
Ppp1r12c	protein phosphatase 1, regulatory subunit 12C	chr1:75625470-75648495	161.348	94.6646	112.12	-0.769279	-0.525133	-0.244146	0.000653095	0.0492732	0.441419	170.969	171.853	142.655	221.516	99.7474	110.958	118.114	81.0813	68.5927	94.5773	132.761	105.308	106.606	103.805
Rab5c	RAB5C, member RAS oncogene family	chr10:88416136-88439534	100.168	94.6475	101.282	-0.0817865	0.0159583	-0.0977448	0.823813	0.972264	0.798519	106.004	87.9676	109.746	102.942	94.1807	104.638	87.7274	99.4671	80.6516	100.753	108.471	105.139	99.9296	91.589
Bhlhe40	basic helix-loop-helix family, member e40	chr4:205170128-205175829	64.4615	94.44	41.6555	0.550961	-0.629931	1.18089	0.0171895	0.0107371	0.000653095	81.7329	82.24	63.8271	63.0933	31.414	95.4359	51.737	139.741	79.2557	106.03	26.8628	72.0803	41.6853	25.9935
Pnrc2	proline-rich nuclear receptor coactivator 2	chr5:157985389-157988374	83.4467	94.3531	88.6662	0.177215	0.0875302	0.0896846	0.555495	0.818519	0.819598	80.6415	90.4008	85.5346	78.1123	82.5442	81.4505	106.594	98.527	99.9056	85.2887	86.1485	82.6607	88.0424	97.8133
Rab31	RAB31, member RAS oncogene family	chr9:112902311-113037023	61.5872	94.3218	67.7899	0.614962	0.13844	0.476522	0.00601445	0.699264	0.0606755	68.8179	58.8034	60.6606	66.6633	52.9909	100.855	85.1038	111.369	66.3653	107.915	62.3285	81.7551	59.6757	67.4001
Sumf1	sulfatase modifying factor 1	chr4:204606894-204688360	96.8551	94.2439	89.5817	-0.0394283	-0.112624	0.0731957	0.923394	0.763011	0.860785	92.5648	87.3216	101.29	99.6408	103.459	126.896	84.6915	88.7544	74.1814	96.696	107.574	79.5968	73.8588	97.2977
Slc35b1	solute carrier family 35, member B1	chr10:83010918-83017992	94.5485	93.8587	75.4674	-0.0105643	-0.325202	0.314637	0.981183	0.22774	0.26727	101.524	73.4807	92.8508	112.711	92.1756	157.658	74.7777	81.7624	65.23	89.8653	93.3513	90.8324	51.241	66.4449
Myo1d	myosin ID	chr10:67189250-67811744	55.6916	93.7763	65.2405	0.751763	0.228308	0.523455	0.0351614	0.681272	0.204774	61.2096	53.9311	54.1928	64.2403	44.8843	99.9676	110.17	96.7137	55.8638	106.166	63.3807	66.0817	58.2152	73.2844
Serpina3n	serine (or cysteine) peptidase inhibitor, clade A, member 3N	chr6:137283366-137290901	15.2653	93.7603	18.732	2.61872	0.295245	2.32347	0.000653095	0.408068	0.000653095	17.4507	18.877	17.7314	11.5747	10.6929	68.1395	213.486	51.9505	64.1621	71.0633	12.959	44.2018	6.6041	11.163
Iqgap1	IQ motif containing GTPase activating protein 1	chr1:143476884-143567395	76.9379	93.7042	87.7681	0.284419	0.190001	0.0944176	0.358544	0.60716	0.832748	84.0392	76.4673	80.3888	82.8096	60.9848	86.1409	134.679	87.3933	61.8309	98.4771	75.6384	95.9805	82.9063	96.5471
Mafk	v-maf avian musculoaponeurotic fibrosarcoma oncogene homolog K	chr12:18914795-18925513	107.046	93.6227	102.492	-0.193298	-0.0627221	-0.130576	0.555651	0.886704	0.732533	81.6682	145.921	135.668	88.982	82.9901	98.0391	133.413	79.7846	74.8194	82.0574	110.108	87.2699	97.0797	115.509
Tomm7	translocase of outer mitochondrial membrane 7 homolog (yeast)	chr4:7844006-7850848	108.706	93.5857	106.539	-0.216066	-0.0290419	-0.187025	0.477898	0.951844	0.591221	110.449	107.981	136.209	97.0705	91.8182	102.192	100.823	91.0174	82.2876	91.6084	124.485	116.122	106.79	78.7601
Rnase4	ribonuclease, RNase A family 4	chr15:31850395-31866405	104.25	93.5782	69.867	-0.15581	-0.577371	0.42156	0.624297	0.0126641	0.090892	120.011	111.018	116.659	71.8912	101.674	85.3491	97.3864	111.702	83.1441	90.3092	84.8056	56.1314	68.3527	70.1784
Srsf4	serine/arginine-rich splicing factor 4	chr5:153711720-153739489	115.997	93.3778	96.8207	-0.312931	-0.260695	-0.0522355	0.234462	0.388885	0.904337	95.9613	114.503	113.292	142.841	113.385	89.4437	107.916	84.2532	96.2369	89.0391	99.6883	96.3458	98.1482	93.1004
Rbm5	RNA binding motif protein 5	chr8:115857795-115886421	115.964	93.1565	93.1069	-0.315945	-0.316712	0.000767687	0.236759	0.282701	0.998275	106.07	120.762	108.321	142.21	102.455	93.843	98.2898	85.6543	94.4038	93.5916	114.076	76.7793	84.2828	97.2898
Klc1	kinesin light chain 1	chr6:145338401-145371649	71.2596	93.0767	81.3381	0.385336	0.190847	0.194489	0.110625	0.562536	0.559277	72.9471	68.5527	55.4792	67.8278	91.4911	97.4534	95.567	103.036	75.6814	93.646	86.8359	67.4667	76.2028	94.8469
Cct5	chaperonin containing Tcp1, subunit 5 (epsilon)	chr2:104340313-104351466	114.361	93.0308	135.433	-0.297819	0.243978	-0.541796	0.245699	0.428526	0.020707	103.415	119.748	129.983	101.924	116.737	84.6086	90.2206	94.5246	102.967	92.8335	144.004	132.51	146.151	119.066
Ddt	D-dopachrome tautomerase	chr20:16016840-16019309	96.5571	93.0204	98.7569	-0.053835	0.0324996	-0.0863346	0.895839	0.941978	0.83385	102.307	81.5104	111.48	83.5333	103.956	92.4853	74.611	53.8378	166.1	78.0677	121.232	100.653	103.355	69.7881
Dact3	dishevelled-binding antagonist of beta-catenin 3	chr1:80048065-80059888	130.874	93.0184	120.417	-0.492589	-0.120144	-0.372445	0.0424125	0.766645	0.187642	141.331	116.592	116.213	150.482	129.751	117.116	107.869	105.707	53.9109	80.489	110.465	91.9602	117.859	161.382
Arpc4	actin related protein 2/3 complex, subunit 4	chr4:208627501-208638030	98.6574	93.0026	88.7054	-0.0851562	-0.153406	0.0682493	0.813365	0.653841	0.869211	109.731	94.6255	102.863	104.728	81.339	111.648	84.1125	99.6692	68.1751	101.408	93.9277	109.197	77.4132	74.2836
Paip2	poly(A) binding protein interacting protein 2	chr18:28111846-28139054	89.4014	92.6241	98.2096	0.05109	0.135567	-0.0844765	0.897597	0.703786	0.826608	87.4084	91.389	96.2731	76.7265	95.2099	89.7898	95.0441	100.704	92.6546	84.9275	103.446	89.5294	100.588	99.2743
Tinagl1	tubulointerstitial nephritis antigen-like 1	chr5:152101198-152110578	111.902	92.4508	91.107	-0.27548	-0.296603	0.0211233	0.317494	0.306926	0.961788	144.581	85.6464	101.264	146.735	81.2841	102.314	111.676	92.8714	75.5907	79.8023	76.4131	100.224	92.6225	95.1685
Flot1	flotillin 1	chr20:5524707-5535214	84.7021	92.4064	73.9954	0.125595	-0.194963	0.320558	0.705143	0.535941	0.237586	88.0508	79.5755	81.5856	92.8506	81.4481	101.658	100.853	88.8115	72.7538	97.9554	70.8932	79.5189	71.0469	74.5225
Slc25a3	solute carrier family 25 (mitochondrial carrier, phosphate carrier), member 3	chr7:31904032-31911496	91.7611	92.3249	103.52	0.00883651	0.173948	-0.165111	0.98378	0.600778	0.622108	105.698	95.935	95.3897	87.9735	73.8098	85.7207	109.169	89.4394	89.3168	87.9786	100.256	103.474	118.721	91.627
Stub1	STIP1 homology and U-box containing protein 1, E3 ubiquitin protein ligase	chr10:15008911-15012978	124.162	92.2982	109.619	-0.427849	-0.179721	-0.248127	0.338442	0.763677	0.667899	120.22	119.717	119.41	137.567	123.895	96.8016	90.7107	94.4765	82.6482	96.8542	117.735	121.219	103.206	96.3171
Timm8b	translocase of inner mitochondrial membrane 8 homolog b (yeast)	chr8:53635071-53636452	113.808	92.2389	143.192	-0.303159	0.331339	-0.634499	0.242301	0.221819	0.00401415	135.624	111.883	102.487	113.17	105.878	94.1783	78.0499	97.3006	89.9638	101.702	160.355	151.139	161.281	99.9914
Ssb	Sjogren syndrome antigen B	chr3:62727508-62747462	114.845	92.1381	108.912	-0.317819	-0.0765316	-0.241287	0.245232	0.857011	0.452602	114.771	108.895	107.265	116.806	126.488	101.45	84.961	90.3564	106.149	77.7736	120.728	96.0978	92.9609	125.859
Myh10	myosin, heavy chain 10, non-muscle	chr10:55017313-55148296	158.186	92.1142	136.262	-0.780127	-0.215235	-0.564891	0.00221111	0.614994	0.0660573	158.456	154.808	165.254	166.613	145.8	74.4222	124.722	77.9737	91.5111	91.9423	139.76	76.7123	142.817	185.76
Wbp2	WW domain binding protein 2	chr10:103647547-103654798	95.8479	91.8047	96.0257	-0.0621782	0.00267309	-0.0648513	0.872518	0.995809	0.87715	100.943	94.3777	93.1992	103.417	87.3025	85.1362	120.851	75.0023	80.1281	97.9065	88.062	66.7317	121.472	107.837
Sdha	succinate dehydrogenase complex, subunit A, flavoprotein (Fp)	chr1:32971778-32996749	125.728	90.7222	223.579	-0.470777	0.830478	-1.30125	0.0711405	0.00121133	0.000653095	105.938	93.9296	115.711	92.9456	220.115	62.684	70.502	87.1168	154.767	78.5417	235.293	179.373	333.772	145.877
Sbds	Shwachman-Bodian-Diamond syndrome	chr12:31858314-31867474	69.9675	90.6439	78.3831	0.373524	0.163858	0.209666	0.110955	0.622797	0.489092	68.9121	73.1269	58.0986	71.6954	78.0046	84.3703	100.512	91.0627	87.33	89.9444	84.7177	78.571	73.9564	76.2875
Tbca	tubulin folding cofactor A	chr2:43661383-43671792	104.496	90.612	113.97	-0.20567	0.125212	-0.330882	0.499596	0.738579	0.240567	105.531	94.0777	101.956	95.5622	125.351	103.934	78.964	89.0623	96.6458	84.4536	136.16	102.203	102.826	114.692
Glud1	glutamate dehydrogenase 1	chr16:8493024-10843082	81.0369	90.5904	82.0761	0.160779	0.0183845	0.142395	0.765742	0.97835	0.80697	95.5618	88.312	73.8828	68.7673	78.6605	85.2238	96.7758	88.0975	88.544	94.3107	76.8562	86.1893	85.6797	79.5794
Cd164	CD164 molecule, sialomucin	chr20:47942772-47954349	99.7852	90.4099	102.643	-0.142345	0.0407419	-0.183087	0.677725	0.926786	0.591162	123.261	97.9757	110.488	80.8623	86.3391	82.2606	91.6599	87.6401	92.4786	98.0102	101.087	95.0546	108.821	105.611
Gadd45g	growth arrest and DNA-damage-inducible, gamma	chr17:15469296-15471042	154.974	90.374	110.414	-0.778048	-0.489104	-0.288944	0.000653095	0.0531198	0.318227	244.73	111.183	125.53	167.788	125.64	88.3515	64.5304	128.064	95.3342	75.5896	151.03	94.0345	131.543	65.0489
Sec11a	SEC11 homolog A (S. cerevisiae)	chr1:143685593-143711945	86.8927	90.2216	96.3357	0.0542377	0.148836	-0.0945986	0.888875	0.658502	0.798661	92.3412	83.6754	89.9841	87.4633	80.9993	98.3767	81.6788	100.052	77.1518	93.8488	94.5419	102.839	95.0834	92.8789
Znhit6	zinc finger, HIT-type containing 6	chr2:269981413-270012985	90.1656	90.0565	98.9504	-0.00174739	0.134128	-0.135876	0.996803	0.710274	0.703027	68.253	86.4054	83.2632	92.8679	120.039	87.1491	91.6423	75.1086	103.485	92.8977	105.76	93.6279	79.0631	117.351
Gpi	glucose-6-phosphate isomerase	chr1:91207013-91234890	102.24	90.0496	101.539	-0.183168	-0.00992554	-0.173242	0.548367	0.982229	0.605634	109.435	102.308	99.1285	101.142	99.1857	97.4685	73.6852	88.4328	100.933	89.7286	104.022	106.773	114.176	81.1852
Rpl18	ribosomal protein L18	chr1:102779741-102782383	107.511	90.0393	100.095	-0.255856	-0.10312	-0.152736	0.351476	0.783487	0.657862	107.919	104.717	91.0451	125.468	108.405	91.4347	87.7641	79.3346	87.5005	104.163	107.443	102.093	103.642	87.2
Scara5	scavenger receptor class A, member 5 (putative)	chr15:52808018-52912488	61.7792	90.0337	59.7592	0.543344	-0.0479614	0.591305	0.0254298	0.91684	0.0248752	60.3527	65.7495	77.3645	24.4363	80.9931	56.2159	112.27	101.443	126.238	54.0013	66.8262	31.7897	57.7173	82.7035
Psma2	proteasome (prosome, macropain) subunit, alpha type 2	chr17:50791695-50802083	90.2839	90.0067	113.611	-0.00443759	0.331557	-0.335994	0.992157	0.19995	0.198787	97.3237	94.4579	89.5617	83.3176	86.7587	96.4669	85.4293	91.288	93.264	83.5851	126.03	120.269	113.35	94.7932
Pon2	paraoxonase 2	chr4:30251588-30287330	99.7857	89.9259	81.8439	-0.150096	-0.285958	0.135862	0.643089	0.313862	0.697939	103.668	98.0913	99.0388	89.4856	108.645	97.2053	83.4477	94.3787	86.0161	88.5817	88.5791	80.4071	80.7397	77.6497
Map2k2	mitogen activated protein kinase kinase 2	chr7:11626347-11645695	95.5664	89.9229	93.641	-0.0878143	-0.0293624	-0.0584519	0.812243	0.946128	0.889194	73.5789	97.6571	88.8862	118.458	99.2512	128.663	73.1173	88.2779	67.8324	91.7238	99.4962	114.81	88.961	71.2969
Sulf2	sulfatase 2	chr3:168962199-169044078	52.5228	89.6851	41.6479	0.771925	-0.3347	1.10663	0.000653095	0.21274	0.000653095	50.3336	58.6208	53.3751	39.5256	60.7589	89.1792	89.2666	86.9471	74.326	108.707	35.4569	36.5534	42.3891	52.1921
Chpf	chondroitin polymerizing factor	chr9:82438464-82443159	67.5948	89.4222	65.1665	0.403719	-0.0527828	0.456502	0.10892	0.901225	0.0782606	59.5601	63.5521	64.1642	89.6332	61.0646	135.975	69.5891	96.6831	47.4845	97.3791	69.8895	79.6569	48.6874	62.4321
Vapa	VAMP (vesicle-associated membrane protein)-associated protein A	chr9:112833700-112863559	95.0092	89.3919	102.328	-0.087923	0.107065	-0.194988	0.799983	0.778151	0.537901	113.167	87.2122	90.0028	93.6764	90.9869	84.1284	105.311	80.63	81.9771	94.9126	100.119	95.3158	93.2573	120.62
Lxn	latexin	chr2:183950901-183995881	35.2152	89.1456	42.253	1.33996	0.262854	1.07711	0.000653095	0.64194	0.00401415	33.7884	34.1453	42.9374	25.8876	39.3174	103.613	87.4303	89.846	64.0372	100.802	39.5392	50.2147	38.6718	40.5863
Ahnak	AHNAK nucleoprotein	chr1:232122558-232152286	106.774	89.0839	94.0456	-0.261321	-0.183125	-0.0781958	0.525218	0.713356	0.894526	114.952	104.671	101.987	93.545	118.715	85.0025	107.723	82.2882	84.1612	86.2444	102.771	74.5304	85.6232	113.258
Ppm1g	protein phosphatase, Mg2+/Mn2+ dependent, 1G	chr6:36336358-36355555	86.9776	89.0726	94.6426	0.0343386	0.121846	-0.0875073	0.935523	0.740698	0.821176	92.2802	77.7412	70.3728	102.299	92.1941	87.8562	93.4449	88.7125	91.7401	83.6093	93.2084	102.689	92.8374	89.8355
Oat	ornithine aminotransferase	chr1:211555926-211575708	97.3593	89.0232	95.419	-0.129138	-0.029042	-0.100096	0.698371	0.949688	0.790014	100.937	109.047	95.4022	87.2379	94.1732	97.7083	83.3956	95.2393	73.9226	94.85	101.727	85.1064	88.3104	106.532
Ltbr	lymphotoxin beta receptor (TNFR superfamily, member 3)	chr4:224839882-224846284	70.6209	88.9844	70.6944	0.333458	0.00150076	0.331957	0.179028	0.997463	0.217826	58.2986	67.4581	67.0725	81.3826	78.8927	106.274	85.1603	101.74	76.7856	74.9626	77.8035	84.391	52.8506	67.7324
Esyt1	extended synaptotagmin-like protein 1	chr7:2897631-2914841	102.564	88.8836	92.5991	-0.206536	-0.147454	-0.0590815	0.51175	0.693794	0.895828	108.503	105.441	104.569	113.142	81.1661	95.6242	115.533	75.307	66.3059	91.648	99.5511	92.3613	81.6496	96.8345
Pfdn1	prefoldin subunit 1	chr18:28940033-28997301	99.754	88.7568	92.6553	-0.168518	-0.106501	-0.0620168	0.578114	0.773966	0.881842	107.362	103.338	102.091	97.802	88.1776	108.074	91.166	88.2348	71.124	85.1848	114.682	89.6549	71.628	94.6563
Tax1bp1	Tax1 (human T-cell leukemia virus type I) binding protein 1	chr4:147442104-147497945	89.9401	88.7113	95.4988	-0.0198466	0.0865179	-0.106365	0.963791	0.829334	0.784606	106.574	91.2438	87.7087	76.0191	88.155	79.4569	106.39	86.8826	93.6491	77.1783	97.4868	85.4323	95.0498	104.026
Txndc15	thioredoxin domain containing 15	chr17:11147136-11548898	118.751	88.4008	98.3376	-0.425807	-0.272123	-0.153684	0.223626	0.537628	0.771248	110.921	115.911	110.119	130.447	126.356	103.007	85.6052	91.9583	77.6482	83.7847	125.149	100.264	80.22	87.7177
Oaz1	ornithine decarboxylase antizyme 1	chr7:11919842-11922300	92.8735	88.1428	101.303	-0.075424	0.125336	-0.20076	0.838869	0.729163	0.516385	93.0002	96.3982	91.3032	96.1067	87.559	105.936	86.5944	76.8563	77.1372	94.1896	105.886	101.642	95.8693	101.814
Lamc1	laminin, gamma 1	chr13:75622194-75749168	83.224	88.1202	87.5866	0.0824725	0.0737105	0.00876199	0.846429	0.876781	0.986652	100.975	73.5701	84.9091	85.4568	71.2089	88.1258	89.7059	107.035	65.7687	89.9658	82.0614	88.4533	74.6867	105.145
Rpl24	ribosomal protein L24	chr11:50298774-50304113	109.35	88.0055	96.6436	-0.313283	-0.178202	-0.135081	0.229159	0.591792	0.714883	123.266	144.755	98.6996	88.1822	91.8453	96.2296	86.9767	70.9085	94.9876	90.925	121.135	89.8612	82.9524	92.6259
Ppfibp1	PTPRF interacting protein, binding protein 1 (liprin beta 1)	chr4:245465651-245578035	92.5279	87.935	87.5665	-0.0734511	-0.0795098	0.00605877	0.85094	0.849849	0.991785	74.7834	110.618	95.5714	86.9934	94.6737	72.8441	99.9763	82.8003	95.9613	88.0929	85.9249	66.4721	79.0015	118.867
Mmp14	matrix metallopeptidase 14 (membrane-inserted)	chr15:36960281-36969506	70.1546	87.4264	76.5133	0.317532	0.125173	0.192359	0.22883	0.735782	0.562781	58.0908	66.6728	81.9798	66.6682	77.3614	91.9171	95.8446	108.976	52.1011	88.293	73.6472	80.4086	58.6445	93.353
Prg4	proteoglycan 4	chr13:72576528-72653723	7.31524	87.3255	13.0343	3.57743	0.833338	2.74409	0.000653095	0.517086	0.00221111	7.20321	9.33848	6.42027	5.77559	7.83864	46.0182	184.714	49.3655	82.0627	74.4672	9.62685	19.5755	8.81135	14.1236
Fip1l1	factor interacting with PAPOLA and CPSF1	chr14:35976769-36034611	75.7789	87.2994	76.625	0.204177	0.0160193	0.188157	0.487416	0.972841	0.557567	67.9677	88.5261	68.8486	77.671	75.8811	89.4074	84.0295	78.4241	109.798	74.8384	76.2379	69.5225	81.81	78.9296
Prkcsh	protein kinase C substrate 80K-H	chr8:23069739-23081289	86.7208	87.1444	81.2904	0.00703051	-0.0932916	0.100322	0.986652	0.8067	0.792016	89.1499	87.4334	93.7012	92.5533	70.7659	95.2095	89.5862	84.4677	77.0819	89.3767	76.7226	91.0076	79.3327	78.0988
Csnk2b	casein kinase 2, beta polypeptide	chr20:7181950-7186371	95.0697	86.7811	94.2781	-0.131604	-0.0120627	-0.119541	0.698187	0.979292	0.742431	92.9767	85.048	92.8365	105.465	99.0225	101.428	74.2262	83.8008	88.8856	85.565	96.0161	99.6327	110.936	70.5273
Rsrc2	arginine/serine-rich coiled-coil 2	chr12:40146859-40167593	90.086	86.7639	87.9354	-0.0542078	-0.0348584	-0.0193493	0.892939	0.936533	0.965328	78.4954	90.5953	91.4788	97.0558	92.8047	84.496	83.7292	84.2681	95.7117	85.6146	88.458	80.0628	96.0728	87.148
Eng	endoglin	chr3:17021672-17058548	66.2988	86.6986	53.8299	0.387026	-0.300574	0.6876	0.109824	0.285919	0.00313022	63.5073	59.2774	76.1715	76.8825	55.6552	91.4959	77.2813	104.689	66.0751	93.9518	50.5699	72.5028	44.6872	47.56
Fkbp8	FK506 binding protein 8	chr16:20501664-20508369	114.478	86.655	91.5605	-0.401721	-0.322277	-0.0794436	0.0851517	0.240377	0.843632	99.0981	118.349	119.762	133.682	101.501	112.354	88.234	78.0055	69.959	84.7227	95.2762	86.4137	101.983	82.5688
Rad23b	RAD23 homolog B (S. cerevisiae)	chr5:76267573-76305117	86.0277	86.6509	95.6895	0.0104137	0.153561	-0.143147	0.981298	0.661797	0.692172	103.006	85.2071	83.9852	75.2424	82.6977	81.4932	91.4217	89.632	83.0183	87.6892	87.8764	99.5268	97.097	98.258
Bnip3l	BCL2/adenovirus E1B interacting protein 3-like	chr15:47927966-47951099	76.3936	86.6319	59.5051	0.181446	-0.36044	0.541886	0.57557	0.178398	0.0272476	56.6661	79.1916	78.3107	88.8989	78.901	137.408	72.6821	63.8472	88.086	71.1363	64.5501	62.2586	60.2234	50.9882
Fam32a	family with sequence similarity 32, member A	chr16:19164832-19169329	78.9357	86.5059	84.3163	0.13212	0.0951333	0.0369868	0.69443	0.801968	0.931762	67.025	72.697	84.5782	87.3897	82.9887	95.256	86.2027	76.3557	87.969	86.7462	85.8486	74.455	89.4009	87.5607
Ddost	dolichyl-diphosphooligosaccharide-protein glycosyltransferase	chr5:160417853-160424605	81.3165	86.4734	77.0914	0.0887076	-0.0769788	0.165686	0.804473	0.843096	0.619604	77.3217	73.3805	88.0263	85.4768	82.3774	98.1962	65.9865	107.51	69.4527	91.2218	73.0308	83.8427	75.7747	75.7173
LOC689574	hypothetical protein LOC689574	chr4:62503530-62513359	79.025	86.3987	77.0216	0.1287	-0.0370449	0.165745	0.710045	0.931956	0.624895	90.2331	69.9035	94.5976	67.8324	72.5583	114.41	82.2061	83.4945	71.022	80.8608	91.7989	62.1168	80.2114	73.9595
Nsfl1c	NSFL1 (p97) cofactor (p47)	chr3:153337780-153361981	86.8107	86.3287	85.9129	-0.00803191	-0.0149986	0.00696664	0.985074	0.975421	0.988163	88.626	84.441	90.3565	84.8373	85.7926	88.3135	84.7772	79.3325	87.4558	91.7646	87.2591	82.944	93.1761	80.2723
Eif3k	eukaryotic translation initiation factor 3, subunit K	chr1:89103167-89108321	78.4395	86.1934	78.611	0.135996	0.00314964	0.132846	0.698371	0.995809	0.729559	72.3891	79.4254	69.8422	84.3322	86.2088	96.8787	79.8642	82.8879	80.0539	91.2821	79.6166	68.0106	91.9164	74.9002
Ccnd1	cyclin D1	chr1:224960135-224969658	20.7617	86.1859	21.679	2.05353	0.0623736	1.99115	0.000653095	0.885414	0.000653095	17.8114	23.5948	23.5611	16.7845	22.0569	124.265	41.0841	82.278	53.9038	129.399	20.0094	33.8483	13.9416	18.9168
Ubtf	upstream binding transcription factor, RNA polymerase I	chr10:90038140-90051350	112.158	86.1534	98.9229	-0.380547	-0.18115	-0.199396	0.138246	0.609042	0.549476	99.8718	114.094	94.8345	136.505	115.482	81.6619	84.7441	82.2549	85.7893	96.3169	101.4	99.4277	88.314	106.55
Jdp2	Jun dimerization protein 2	chr6:118780171-118810422	73.5154	86.0755	60.3647	0.227556	-0.284341	0.511897	0.424462	0.32283	0.0331831	49.301	66.8231	84.9794	69.0643	97.4092	82.0465	70.6836	112.394	80.7731	84.4803	50.2869	57.8819	65.8836	67.4065
Sf3b1	splicing factor 3b, subunit 1	chr9:61275835-61315726	97.956	85.9225	85.0933	-0.189098	-0.203088	0.0139896	0.571038	0.558504	0.977375	93.4717	105.941	94.4525	108.136	87.7789	85.9896	94.7654	79.8849	90.8279	78.1446	91.7776	88.2716	75.5339	84.7902
Tspan3	tetraspanin 3	chr8:59377468-59400900	102.86	85.7559	94.5843	-0.262378	-0.121014	-0.141364	0.32811	0.737685	0.688135	125.803	106.45	100.738	92.0043	89.3072	94.0584	79.3707	91.4623	73.0445	90.8437	99.9642	90.2574	84.4212	103.694
Eif3c	eukaryotic translation initiation factor 3, subunit C	chr1:204943165-204961361	75.9683	85.703	92.0751	0.173948	0.277415	-0.103466	0.580349	0.357694	0.794918	69.7354	73.8266	67.0017	79.994	89.2836	72.973	85.4799	76.3994	110.974	82.6885	81.0976	76.5095	117.356	93.3372
Sfr1	SWI5-dependent recombination repair 1	chr1:274938290-274942306	82.7737	85.4758	79.5035	0.0463427	-0.0581554	0.104498	0.9077	0.888376	0.778652	95.9701	90.8905	85.0663	65.7784	76.1634	80.4836	85.7111	90.5084	81.6983	88.9776	74.5903	88.1142	74.6087	80.7006
Gorasp2	golgi reassembly stacking protein 2	chr3:63767469-63782078	96.2597	85.2665	84.2607	-0.174952	-0.192071	0.017119	0.568701	0.544729	0.969861	102.386	92.9695	91.6457	108.621	85.6766	107.152	72.8958	85.2718	66.0482	94.9652	86.1084	95.3735	77.6505	77.9105
Xbp1	X-box binding protein 1	chr14:86423838-86428923	84.092	85.2071	66.6635	0.0190056	-0.33507	0.354076	0.964945	0.209831	0.173715	93.9814	78.9303	96.8722	77.2706	73.4053	94.5292	81.0491	94.0813	63.0779	93.298	66.892	72.7221	53.924	73.116
P2rx1	purinergic receptor P2X, ligand-gated ion channel, 1	chr10:59305744-59320796	91.1513	85.1378	81.0283	-0.0984626	-0.169838	0.0713749	0.795386	0.617262	0.865969	92.2833	76.5746	89.377	119.421	78.1008	112.749	93.9699	72.239	48.4209	98.3099	78.5855	66.0261	75.7979	103.704
Specc1	sperm antigen with calponin homology and coiled-coil domains 1	chr10:48031611-48234775	68.0597	84.9594	86.4854	0.319973	0.345655	-0.0256828	0.222775	0.219696	0.957934	56.7861	70.3847	74.5466	73.5377	65.0434	87.593	109.413	78.5994	59.1198	90.0717	81.0289	67.4952	69.7486	127.669
Hnrnpul1	heterogeneous nuclear ribonucleoprotein U-like 1	chr1:83774020-83808198	88.0695	84.9048	82.993	-0.0527972	-0.0856532	0.0328559	0.896672	0.83495	0.943522	92.6504	87.7073	83.0944	80.8317	96.0638	76.9044	87.3541	83.9105	82.856	93.4988	70.7422	72.4643	91.886	96.8795
Hdgfrp2	hepatoma-derived growth factor-related protein 2	chr9:9959297-9978767	95.7723	84.8675	81.9976	-0.174396	-0.224027	0.0496312	0.567254	0.462598	0.909339	86.5365	94.074	86.9944	110.79	100.467	89.9861	95.4204	78.0249	75.8851	85.0212	91.7295	68.9162	76.4912	90.8535
Atxn2l	ataxin 2-like	chr1:204886851-204898240	78.1807	84.8615	65.2024	0.118298	-0.261886	0.380184	0.749422	0.399482	0.161645	78.7245	73.3624	75.9651	100.718	62.1337	90.593	87.3588	80.0753	71.197	95.0835	60.0434	74.574	62.6001	63.5922
Cmklr1	chemokine-like receptor 1	chr12:50577123-50581377	71.7229	84.8388	58.7548	0.242291	-0.287728	0.530019	0.409841	0.318831	0.0378449	98.0401	65.2281	57.476	79.2942	58.5761	123.998	59.6159	99.4596	43.1315	97.989	69.3019	68.6435	34.95	62.1236
Arl8a	ADP-ribosylation factor-like 8A	chr13:57024683-57033686	104.172	84.8344	79.0582	-0.296241	-0.397976	0.101735	0.248954	0.12057	0.784406	99.8864	103.464	109.366	112.875	95.2669	98.8767	81.7258	80.5981	64.0063	98.9652	69.7227	80.0383	77.4115	89.0603
Kcnmb1	potassium large conductance calcium-activated channel, subfamily M, beta member 1	chr10:18443845-18821334	186.503	84.7572	170.692	-1.13779	-0.127806	-1.00999	0.000653095	0.739265	0.000653095	250.536	168.673	193.026	178.381	141.899	107.066	88.0164	91.4925	37.3423	99.8685	200.159	124.063	133.431	225.114
Eif4a1	eukaryotic translation initiation factor 4A1	chr10:56016894-56022402	96.652	84.7567	93.763	-0.189472	-0.0437811	-0.145691	0.528155	0.92109	0.678623	109.31	89.8742	90.2892	112.096	81.6902	108.625	72.1917	71.2673	80.9461	90.7538	92.0588	111.164	97.1228	74.7067
Eif4b	eukaryotic translation initiation factor 4B	chr7:141476182-141497940	86.1575	84.6553	83.4467	-0.0253765	-0.0461218	0.0207453	0.955754	0.919851	0.966215	71.9098	94.7393	92.5992	80.9762	90.5632	66.986	107.639	70.0213	103.34	75.2904	84.8578	80.3326	85.3912	83.2052
Atp6v0e1	ATPase, H+ transporting, lysosomal, V0 subunit e1	chr10:16661967-16685040	94.2481	84.6064	74.4431	-0.155697	-0.340326	0.184629	0.615607	0.19551	0.567254	109.623	90.7556	100.581	95.5747	74.7065	92.2789	95.4011	77.1003	70.7203	87.5312	76.4383	68.5604	74.5417	78.2319
Eif1	eukaryotic translation initiation factor 1	chr10:88020701-88022793	77.6726	84.5741	71.3353	0.12281	-0.122791	0.245601	0.719432	0.731375	0.410235	82.5541	70.268	80.4328	79.2326	75.8757	89.1674	84.7134	73.3312	79.687	95.9717	67.4686	64.5017	89.2303	64.1404
Mob2	MOB kinase activator 2	chr1:221867137-221924059	93.7645	84.2577	96.3965	-0.154234	0.0399387	-0.194173	0.629357	0.926632	0.541957	81.4028	88.1936	98.3002	103.858	97.0685	105.754	94.0659	78.6509	51.1606	91.6567	112.607	74.6071	87.4504	110.922
Ube2d3	ubiquitin-conjugating enzyme E2D 3	chr2:259146588-259174396	102.67	84.2304	108.311	-0.285605	0.0771639	-0.362769	0.269002	0.848997	0.160098	102.46	111.063	120.371	98.2042	81.2536	86.9964	82.9332	78.1236	90.5607	82.5379	105.939	126.318	108.412	92.5751
Cnpy4	canopy FGF signaling regulator 4	chr12:21386656-21392756	60.8671	84.0055	68.2081	0.464821	0.164281	0.30054	0.0353991	0.614117	0.279713	62.6324	53.5585	57.5899	61.4234	69.1314	95.6519	76.4111	95.1088	66.9994	85.8562	59.0358	69.3412	64.7293	79.7263
Pkdcc	protein kinase domain containing, cytoplasmic	chr6:6384828-6394146	130.454	83.9313	108.312	-0.636261	-0.268348	-0.367913	0.00313022	0.365775	0.165266	109.333	114.96	141.776	154.022	132.179	102.065	90.2465	90.7276	54.352	82.2655	104.235	87.9162	128.623	112.474
Ndrg1	N-myc downstream regulated 1	chr7:107683923-107725300	110.576	83.8527	83.8515	-0.399104	-0.399125	2.03646e-05	0.11494	0.134371	0.99975	138.542	111.495	100.288	96.7367	105.816	82.1612	122.744	71.6996	77.6829	64.9761	81.5906	71.258	81.9303	100.627
Vps25	vacuolar protein sorting 25 homolog (S. cerevisiae)	chr10:88973179-88978661	82.8591	83.8483	70.8445	0.0171217	-0.226005	0.243127	0.968831	0.454118	0.414175	95.5032	85.3247	88.0579	84.5416	60.8682	116.471	81.244	81.549	59.1688	80.8083	84.045	69.7338	62.768	66.831
Ccnl1	cyclin L1	chr2:177110678-177122977	75.087	83.7501	70.9422	0.157529	-0.0819185	0.239448	0.621374	0.83514	0.431	67.4215	89.8499	75.8715	74.907	67.385	77.401	83.9644	82.9712	97.344	77.0701	71.9356	83.7738	73.317	54.7423
Rrad	Ras-related associated with diabetes	chr19:555990-559188	127.763	83.6067	98.2194	-0.611775	-0.379385	-0.23239	0.00525255	0.143962	0.448775	94.3595	139.056	116.603	147.979	140.816	106.273	70.2158	76.7084	68.9188	95.9175	88.9013	121.507	90.3551	92.1142
PCOLCE2	procollagen C-endopeptidase enhancer 2	chr8:102910333-102934915	135.485	83.5231	98.1578	-0.697882	-0.464954	-0.232927	0.00267407	0.0552209	0.43994	137.86	140.447	150.193	99.9007	149.023	80.9415	76.5741	85.336	65.1838	109.58	81.825	87.5844	117.999	105.223
Lgalsl	lectin, galactoside-binding-like	chr14:104777089-104784596	47.3276	83.5074	47.2163	0.819222	-0.0033957	0.822618	0.000653095	0.995809	0.000653095	53.1641	46.5569	46.7477	47.3436	42.8257	84.8584	119.778	65.6198	61.1917	86.0894	48.0136	53.7116	36.5108	50.6293
Tmem214	transmembrane protein 214	chr6:36684557-36692304	99.6133	83.4489	77.3768	-0.255445	-0.364437	0.108992	0.382823	0.183884	0.778901	103.856	85.7629	103.465	132.056	72.9258	107.963	83.4855	89.7311	54.8457	81.2195	81.2063	88.3435	62.5288	77.4287
Zcrb1	zinc finger CCHC-type and RNA binding motif 1	chr7:134255941-134269279	99.5288	83.4127	81.4756	-0.254847	-0.288745	0.0338983	0.35333	0.310345	0.940999	103.967	94.0388	77.5473	125.35	96.7403	119.416	82.599	65.7577	77.0541	72.2364	101.016	83.9681	63.0661	77.8525
Dstn	destrin	chr3:144462863-144489659	94.3696	83.2507	99.7337	-0.180858	0.0797601	-0.260619	0.555217	0.844228	0.376914	105.289	96.6655	98.7644	95.4307	75.6979	75.5102	115.02	87.7382	54.2322	83.7527	87.7005	82.218	105.166	123.851
Ninj1	ninjurin 1	chr17:17930058-17945126	55.1358	83.1052	64.7093	0.591949	0.230984	0.360964	0.00601445	0.447721	0.163093	56.8138	45.0568	55.2421	67.0089	51.5574	85.4604	94.9094	89.3398	61.7913	84.0248	56.3846	76.574	61.082	64.7967
Tm9sf2	transmembrane 9 superfamily member 2	chr15:111913764-111967206	71.2343	83.088	74.8826	0.222067	0.072057	0.15001	0.449224	0.859067	0.668087	79.3518	77.2416	67.4962	59.7845	72.2976	91.2996	78.4524	84.38	73.2573	88.0505	76.9037	75.8131	73.5725	73.241
Gstm1	glutathione S-transferase mu 1	chr2:230272739-230278117	129.596	82.9157	84.7979	-0.644307	-0.611925	-0.0323825	0.00267407	0.00677966	0.941667	140.049	136.111	169.061	106.47	96.2906	77.4838	119.472	79.2232	76.7933	61.6069	89.5953	81.5459	78.8227	89.2277
Lgmn	legumain	chr6:135492942-135518919	53.8373	82.8781	56.0519	0.622385	0.0581573	0.564228	0.00267407	0.886924	0.0123316	56.0444	55.2608	50.3924	57.9316	49.5571	80.6858	109.15	83.3607	66.573	74.6212	45.6151	67.9694	58.3876	52.2354
Ahcyl1	adenosylhomocysteinase-like 1	chr2:229905781-229940650	97.6688	82.497	122.333	-0.243555	0.324849	-0.568404	0.411293	0.278897	0.0251429	103.978	85.055	90.9534	100.761	107.596	75.0928	78.6364	76.6804	104.058	78.0179	130.833	120.584	142.947	94.9701
Mpdu1	mannose-P-dolichol utilization defect 1	chr10:56006151-56012851	76.5072	82.4731	81.8929	0.108327	0.0981417	0.0101855	0.754477	0.7942	0.981194	79.5503	75.2822	76.6662	77.3406	73.6968	94.5311	99.7455	71.9104	74.4779	71.7005	97.9044	82.5023	75.2391	71.9256
Hirip3	HIRA interacting protein 3	chr1:205278317-205281343	111.587	82.4711	100.897	-0.436215	-0.145296	-0.290919	0.0634601	0.690297	0.308311	90.7208	108.945	100.966	136.128	121.178	81.7046	74.7597	85.2705	90.523	80.0977	98.307	92.8852	88.1797	124.215
Ssrp1	structure specific recognition protein 1	chr3:78958626-78968275	89.6974	82.4522	85.6791	-0.121509	-0.0661225	-0.0553861	0.728273	0.876367	0.897314	89.8351	90.97	79.6189	98.205	89.858	81.9836	86.4967	84.4386	79.5824	79.7595	91.4432	80.8301	74.717	95.7261
Arl6ip4	ADP-ribosylation-like factor 6 interacting protein 4	chr12:39776738-39778884	71.0975	82.4163	71.5999	0.21313	0.0101579	0.202972	0.445341	0.982697	0.507605	57.6146	61.5763	66.5429	78.5488	91.2049	99.5922	80.873	69.2038	82.0953	80.3171	72.8809	71.5549	75.7584	66.2053
Acat1	acetyl-CoA acetyltransferase 1	chr8:56749861-56778336	124.727	82.2567	199.693	-0.600563	0.679013	-1.27958	0.0120346	0.00677966	0.000653095	119.763	89.1423	106.745	101.702	206.28	64.1478	46.081	78.3711	158.356	64.3272	220.285	169.312	289.044	120.129
Rnf5	ring finger protein 5, E3 ubiquitin protein ligase	chr20:6381700-6596927	88.2069	82.2185	86.5075	-0.101428	-0.0280658	-0.0733627	0.937097	0.982802	0.95891	83.4791	82.3475	93.5794	106.481	75.1472	108.303	76.3158	80.9682	68.3968	77.1083	86.6417	94.6662	90.358	74.3642
Plat	plasminogen activator, tissue	chr16:73730260-73754851	35.0694	82.1502	49.3193	1.22805	0.491939	0.736113	0.000653095	0.0366367	0.00121133	41.3026	33.9042	42.1819	31.8837	26.0745	95.2845	72.6985	90.7403	55.1211	96.9068	48.4496	70.1528	41.3465	37.3283
Comt	catechol-O-methyltransferase	chr11:89762304-89829567	62.8545	81.9728	59.1368	0.383129	-0.0879597	0.471089	0.121647	0.827124	0.0615995	66.4175	65.564	74.1927	53.6714	54.4268	80.3961	97.215	84.5333	60.8682	86.8513	65.1262	57.0966	56.9753	57.349
Aurkaip1	aurora kinase A interacting protein 1	chr5:176750388-176751785	79.5647	81.9405	86.3494	0.0424478	0.118057	-0.0756096	0.915513	0.750474	0.848962	77.5877	77.0629	69.3628	90.7082	83.1019	97.9405	80.0306	72.3376	80.6104	78.7833	94.3506	83.9376	93.9089	73.2004
Ccdc124	coiled-coil domain containing 124	chr16:20174989-20180809	82.2924	81.403	81.867	-0.0156769	-0.0074761	-0.00820078	0.972189	0.98699	0.986365	69.0222	69.3711	66.2982	90.5417	116.229	89.0468	78.5077	83.58	84.0764	71.8039	86.444	73.6431	79.9231	87.4579
Rwdd1	RWD domain containing 1	chr20:29363287-29379902	86.3316	81.3842	79.8029	-0.0851411	-0.113448	0.028307	0.814298	0.757057	0.94993	107.827	79.8033	69.7552	85.8751	88.3974	106.307	77.1899	74.099	81.8753	67.4498	82.5838	73.1868	70.6037	92.8372
Dnajc7	DnaJ (Hsp40) homolog, subfamily C, member 7	chr10:88291788-88327490	74.4654	81.3576	84.1814	0.127707	0.176931	-0.0492242	0.698439	0.589582	0.905754	75.1762	67.2681	68.5132	72.7429	88.6268	84.5025	80.0561	81.2038	85.4862	75.5395	85.4553	77.1016	85.6576	88.5112
Rab10	RAB10, member RAS oncogene family	chr6:37479067-37531622	70.5607	81.3543	85.9414	0.205354	0.284488	-0.0791338	0.488569	0.32283	0.84568	79.8716	66.9132	60.894	65.0258	80.0989	70.9817	73.3181	95.4306	85.0208	82.0205	83.9543	82.4498	93.2016	84.1599
Igfbp5	insulin-like growth factor binding protein 5	chr9:79924621-79937205	165.746	81.3535	96.426	-1.0267	-0.781478	-0.245218	0.000653095	0.00121133	0.42606	114.726	252.71	139.816	113.818	207.659	69.9107	58.6541	99.0229	60.0451	119.135	74.7664	70.3724	100.649	139.916
Lrrc59	leucine rich repeat containing 59	chr10:82171006-82185664	69.1736	81.3533	83.1571	0.233979	0.265619	-0.0316394	0.403853	0.370644	0.945182	70.7159	59.3432	66.6264	76.4749	72.7075	85.3786	65.8067	90.7377	72.3534	92.4898	70.3461	92.0258	88.5897	81.6669
Srpx2	sushi-repeat-containing protein, X-linked 2	chrX:104569971-104594902	18.0251	81.2434	30.3654	2.17224	0.75242	1.41982	0.000653095	0.00401415	0.000653095	18.7099	16.8267	21.9198	22.9814	9.68774	107.848	79.3086	67.958	47.5234	103.579	25.6216	49.6327	20.0408	26.1665
Cpq	carboxypeptidase Q	chr7:71880846-72338527	65.9539	81.2422	67.3761	0.300771	0.0307791	0.269992	0.24132	0.943892	0.348489	76.5163	73.4428	69.0992	60.0115	50.6999	76.9745	76.6429	89.3266	67.8021	95.465	77.2855	58.9845	63.7626	69.4719
Cd302	CD302 molecule	chr3:51435505-51469216	90.0094	81.2223	86.2889	-0.148199	-0.0609008	-0.0872984	0.647772	0.883489	0.819993	82.1073	91.2799	103.83	74.274	98.5559	66.6574	103.178	82.5759	92.0197	61.6804	101.69	65.9442	88.9257	88.5955
Dlst	dihydrolipoamide S-succinyltransferase (E2 component of 2-oxo-glutarate complex)	chr6:116597172-116620312	123.863	81.2048	198.169	-0.609113	0.677984	-1.2871	0.00896933	0.010049	0.000653095	111.214	96.6815	106.552	118.676	186.192	72.882	66.7879	79.1412	108.89	78.3229	218.189	197.866	263.08	113.542
Id1	inhibitor of DNA binding 1	chr3:154620062-154621190	44.633	81.1105	56.4535	0.861779	0.338951	0.522828	0.000653095	0.240567	0.0306037	56.5946	37.2873	43.9173	53.9593	31.4064	102.753	32.9912	89.3554	79.2077	101.245	43.4641	77.9692	58.5486	45.832
Rarres2	retinoic acid receptor responder (tazarotene induced) 2	chr4:142850800-142872451	200.423	81.0436	131.68	-1.30628	-0.606014	-0.700265	0.000653095	0.0113953	0.00267407	218.543	195.715	228.666	187.387	171.805	79.3192	83.8463	87.9465	71.033	83.0731	141.897	119.561	124.95	140.312
Txndc12	thioredoxin domain containing 12 (endoplasmic reticulum)	chr5:132291195-132316223	77.6112	80.8162	80.3433	0.0583787	0.049912	0.00846674	0.881722	0.908755	0.985863	80.8616	81.0267	76.3336	76.8406	72.9937	80.979	86.4738	79.0875	78.283	79.2576	84.5756	78.7147	74.6243	83.4586
Gps2	G protein pathway suppressor 2	chr10:56269586-56272107	105.466	80.7696	86.6454	-0.38489	-0.28358	-0.10131	0.10142	0.318227	0.787693	98.7405	95.1442	105.822	128.436	99.1854	95.5179	67.9906	73.5049	79.3702	87.4643	87.7705	86.2104	73.0415	99.5592
Lamp2	lysosomal-associated membrane protein 2	chrX:124809052-124852469	51.6627	80.622	58.9868	0.64205	0.191268	0.450782	0.000653095	0.537519	0.0642028	53.8337	58.6138	56.5899	43.662	45.614	74.1398	97.6772	84.3645	78.2734	68.655	51.3634	63.0602	63.0561	58.4673
Psmd1	proteasome (prosome, macropain) 26S subunit, non-ATPase, 1	chr9:92810409-92884823	87.0376	80.5027	77.0007	-0.112601	-0.176767	0.064166	0.760629	0.603529	0.879583	93.7792	77.3158	73.8813	94.4809	95.7307	106.988	74.3842	73.1187	71.0937	76.9291	78.2488	83.4742	64.9304	81.3495
Ganab	glucosidase, alpha; neutral AB	chr1:232034217-232053998	91.1452	80.4674	89.7071	-0.179763	-0.022944	-0.156819	0.581005	0.961388	0.670918	94.4241	82.3724	98.7113	93.1951	87.0231	95.5695	75.6487	83.43	65.7112	81.9774	101.574	93.9775	81.9481	81.3285
Bmp4	bone morphogenetic protein 4	chr15:24735138-24738725	40.3057	80.3978	26.9797	0.996172	-0.579111	1.57528	0.000653095	0.0166006	0.000653095	51.9148	32.2325	47.8352	31.0217	38.5243	113.064	75.6044	64.7204	70.1147	78.4858	28.6171	16.6104	26.067	36.6241
Midn	midnolin	chr7:12585957-12592656	71.7997	80.3868	79.5366	0.162981	0.14764	0.0153407	0.593704	0.673687	0.974966	63.2602	74.247	81.2379	87.1597	53.0938	68.9169	82.9828	89.7978	85.7396	74.497	61.3774	75.5776	114.404	66.7868
Kdelr2	KDEL (Lys-Asp-Glu-Leu) endoplasmic reticulum protein retention receptor 2	chr12:15232546-15250771	88.4412	80.3694	81.1553	-0.138072	-0.124033	-0.0140391	0.665154	0.736532	0.976821	99.4174	94.2939	96.1528	88.5979	63.7438	92.5405	71.0081	91.0868	59.653	87.5584	75.4434	98.653	69.5715	80.9532
Ehd4	EH-domain containing 4	chr3:118425619-118489608	43.5087	80.3131	42.8761	0.884332	-0.0211298	0.905462	0.000653095	0.962007	0.000653095	38.116	46.1313	49.1395	42.1875	41.9692	91.3015	82.9255	83.5102	60.8871	82.9412	44.0285	48.5566	34.2246	44.6948
Ccni	cyclin I	chr14:16267527-16290318	118.961	80.139	112.265	-0.56991	-0.0835815	-0.486329	0.00860774	0.842309	0.0517078	122.028	139.28	136.734	90.7903	105.973	68.1361	95.3763	77.692	81.7093	77.7812	115.122	103.023	111.891	119.022
LOC288913	similar to LEYDIG CELL TUMOR 10 KD PROTEIN	chr19:36332002-36334782	72.082	80.0906	77.995	0.151994	0.113744	0.0382507	0.646169	0.766645	0.929685	63.6338	65.9501	69.0787	72.149	89.5981	86.1703	71.0702	75.7572	95.6566	71.7986	84.1912	73.6191	78.5888	75.5811
Rab6a	RAB6A, member RAS oncogene family	chr1:171826304-171865434	68.6282	79.7984	72.6107	0.217559	0.0813818	0.136177	0.45699	0.843096	0.708221	71.0265	65.3003	70.7932	70.6554	65.3654	79.7744	72.3449	87.3133	71.2962	88.2632	63.1676	76.6642	76.9659	73.6451
Thra	thyroid hormone receptor alpha	chr10:86453435-86486808	141.609	79.6598	154.238	-0.829985	0.123252	-0.953237	0.202104	0.89058	0.00860774	114.626	138.041	143.968	128.564	182.844	73.615	85.5176	78.086	75.2984	85.7822	171.826	86.4836	132.732	225.912
Bclaf1	BCL2-associated transcription factor 1	chr1:17344330-17371115	76.5844	79.5156	78.7811	0.0541873	0.0407986	0.0133887	0.895343	0.926758	0.977595	61.5616	86.7079	77.3671	85.1025	72.183	70.9353	89.5227	75.3046	89.5209	72.2946	76.7987	89.8547	72.5499	75.9211
Cs	citrate synthase	chr7:2731091-2757427	106.295	79.3882	207.339	-0.421079	0.963917	-1.385	0.0865155	0.000653095	0.000653095	100.883	88.8427	93.8686	75.0549	172.827	51.1923	61.2756	90.5342	128.706	65.2331	212.536	190.118	304.867	121.836
Tceal8	transcription elongation factor A (SII)-like 8	chrX:106411785-106413858	76.7533	79.3552	79.1293	0.048096	0.043984	0.00411199	0.900728	0.918266	0.993444	84.6218	65.1888	79.3777	73.3454	81.2328	98.7053	57.2722	90.7075	82.9055	67.1854	72.8053	83.6851	82.8789	77.148
Mdh2	malate dehydrogenase 2, NAD (mitochondrial)	chr12:25938702-25951655	113.545	79.1794	190.285	-0.520063	0.744901	-1.26496	0.0242889	0.00221111	0.000653095	109.249	87.5249	119.606	87.2921	164.052	65.8061	60.278	87.0271	107.541	75.2453	189.764	158.366	292.825	120.184
Vamp8	vesicle-associated membrane protein 8	chr4:165020593-165023049	65.2938	78.9989	66.8144	0.274887	0.0332129	0.241674	0.390204	0.94965	0.504488	47.7023	62.4208	66.9649	83.4947	65.8863	96.3009	87.3214	64.0563	61.9291	85.387	94.7973	52.7425	76.3135	43.4044
Nsa2	NSA2 ribosome biogenesis homolog (S. cerevisiae)	chr2:46895517-47171842	97.3092	78.9652	86.2792	-0.301359	-0.173563	-0.127796	0.567232	0.794918	0.863452	84.963	115.494	86.2206	90.5292	109.339	83.3589	98.0163	64.303	79.672	69.4758	94.5756	77.7403	68.5571	104.244
Thrap3	thyroid hormone receptor associated protein 3	chr5:147947767-147989301	85.5049	78.8473	85.8055	-0.116945	0.00506351	-0.122009	0.74747	0.992308	0.751375	78.4029	86.5939	83.2644	92.7126	86.5508	65.9259	96.3801	68.0748	90.8744	72.9814	85.3768	72.1208	84.8042	100.92
C1qtnf5	C1q and tumor necrosis factor related protein 5	chr8:47059595-47061466	59.685	78.8452	48.392	0.401655	-0.302599	0.704255	0.081323	0.265595	0.00173202	66.6832	59.5795	52.8446	54.4946	64.823	93.7223	63.3051	101.833	61.9674	73.3984	57.3717	39.9995	40.148	56.0489
Cnih	NA	chr15:27512054-27523829	72.2852	78.7998	70.9181	0.124492	-0.0275473	0.152039	0.705975	0.950703	0.653905	78.4465	69.3779	71.9692	73.4297	68.2027	90.9693	70.3906	76.0964	73.8248	82.7179	75.2592	86.2817	63.6561	58.4752
LOC304131	similar to C21ORF7	chr11:30834011-30877229	157.394	78.6173	129.583	-1.00147	-0.280506	-0.720961	0.000653095	0.3502	0.000653095	120.959	158.091	166.952	183.846	157.124	88.95	79.4026	76.2523	61.1872	87.2942	155.185	85.4273	122	155.721
Cdkn1a	cyclin-dependent kinase inhibitor 1A	chr20:8592436-8602879	38.7466	78.5265	59.4764	1.01911	0.618248	0.400862	0.000653095	0.00484629	0.119673	34.3521	33.6714	44.3793	36.7426	44.5876	104.552	82.3948	78.185	47.1832	80.3171	86.7969	54.3149	44.2198	52.5739
Id3	inhibitor of DNA binding 3	chr5:158263322-158264892	48.0818	78.3216	47.2286	0.703921	-0.0258306	0.729751	0.00173202	0.956762	0.00173202	64.7805	41.8856	47.8897	55.2309	30.6223	91.1454	69.9698	94.0145	56.3319	80.1466	33.8779	54.1337	38.2813	62.6213
Sult1a1	sulfotransferase family, cytosolic, 1A, phenol-preferring, member 1	chr1:205079584-205083105	115.661	78.2878	75.9976	-0.563037	-0.605871	0.0428336	0.0123316	0.00896933	0.923307	132.992	121.151	115.652	93.2418	115.267	57.7446	83.8561	63.2162	141.417	45.2058	80.0133	42.9813	89.4844	91.5115
Adipor1	adiponectin receptor 1	chr13:56297570-56316895	67.4972	78.0107	64.4186	0.208845	-0.06735	0.276195	0.466289	0.868719	0.327172	75.6172	68.5921	76.2372	62.4279	54.6114	86.3444	88.3738	69.4864	67.3939	78.4548	66.8655	68.8267	62.9973	58.9847
Fbxo6	F-box protein 6	chr5:168614473-168617885	79.4055	77.9578	77.1261	-0.0265452	-0.0420204	0.0154752	0.948133	0.921204	0.972974	85.6423	72.5666	80.5338	87.0748	71.21	92.9862	76.6263	71.6264	67.255	81.2951	71.1464	76.335	83.7409	77.282
Hexa	hexosaminidase A	chr8:64087246-64112576	53.7672	77.9327	61.9148	0.535501	0.203557	0.331944	0.014794	0.505719	0.218276	53.8743	51.7507	51.5255	61.217	50.4687	90.75	66.144	102.135	56.2915	74.3426	66.6899	69.7681	54.0081	57.1931
Hnrnph2	heterogeneous nuclear ribonucleoprotein H2 (H')	chrX:105307018-105312216	77.8196	77.8929	95.4252	0.00135845	0.294236	-0.292878	0.997473	0.295195	0.299983	72.3829	86.8925	77.8699	73.0963	78.8565	68.3793	82.0141	84.7248	84.1497	70.1968	99.5454	96.7241	85.816	99.6153
Puf60	poly-U binding splicing factor 60	chr7:117114907-117125839	94.1269	77.8342	86.1745	-0.274202	-0.127346	-0.146856	0.301405	0.726657	0.674215	87.1188	90.8003	80.5381	103.027	109.15	90.9989	77.7377	72.3706	78.1117	69.9522	97.3012	89.9301	78.8332	78.6335
Ptges3	prostaglandin E synthase 3 (cytosolic)	chr7:2459081-2476400	102.209	77.7205	124.464	-0.395158	0.284206	-0.679364	0.100296	0.323413	0.00267407	97.028	106.469	116.052	83.105	108.392	63.3769	71.5604	81.0057	101.429	71.2307	149.496	111.085	113.467	123.809
Jmjd8	jumonji domain containing 8	chr10:15008911-15012978	86.1696	77.5112	76.1205	-0.152774	-0.178893	0.0261197	0.762361	0.733332	0.968982	86.9612	88.1254	87.8534	93.3623	74.5457	91.0613	68.8673	86.6098	54.2146	86.8029	83.7746	68.7876	70.0714	81.8484
Fez2	fasciculation and elongation protein zeta 2 (zygin II)	chr6:956474-995426	53.8644	77.4232	58.0684	0.523435	0.108422	0.415013	0.0123316	0.770745	0.0935114	64.3772	46.1318	51.1039	57.1878	50.5213	73.1487	102.305	80.3253	62.5303	68.8065	58.0154	50.0719	59.5236	64.6628
Pla2g2a	phospholipase A2, group IIA (platelets, synovial fluid)	chr5:161024072-161026650	90.9751	77.0679	77.1322	-0.239341	-0.238138	-0.00120308	0.431608	0.458213	0.99809	139.179	35.566	134.076	52.3797	93.6749	82.389	59.6518	117.322	85.084	40.8925	94.597	60.9194	92.5419	60.4705
Dnajb4	DnaJ (Hsp40) homolog, subfamily B, member 4	chr2:276072492-276101989	227.872	77.0445	249.959	-1.56446	0.133465	-1.69793	0.000653095	0.757952	0.000653095	149.952	307.632	346.696	180.305	154.777	73.5328	87.6079	60.1817	75.2632	88.637	230.556	230.603	441.645	97.0319
Pdcd4	programmed cell death 4	chr1:282042185-282060931	76.0677	76.9963	75.2388	0.0175056	-0.0158055	0.0333111	0.969771	0.972399	0.939967	83.2482	90.3899	71.1364	59.1008	76.4629	53.6066	89.4765	71.3852	105.956	64.5575	78.0184	89.3913	58.858	74.6877
Vasp	vasodilator-stimulated phosphoprotein	chr1:81437097-81452365	97.323	76.4101	82.8519	-0.349018	-0.232246	-0.116771	0.169057	0.452424	0.752716	85.2208	95.9709	98.515	117.153	89.7553	107.172	67.879	65.2024	53.9685	87.8288	85.8937	90.9082	81.5018	73.104
Lgals3	lectin, galactoside-binding, soluble, 3	chr15:28094343-28106279	26.6279	76.3315	33.0977	1.51934	0.313794	1.20555	0.000653095	0.341455	0.000653095	36.729	18.8283	33.9181	16.2784	27.3856	65.4106	85.7356	75.1492	89.5606	65.8013	26.5348	54.806	31.0044	20.0456
Polr2f	polymerase (RNA) II (DNA directed) polypeptide F	chr7:120374413-120383859	73.205	76.2461	80.0959	0.0587207	0.129786	-0.0710652	0.8883	0.740359	0.866865	77.902	57.965	68.4135	83.4916	78.253	91.3393	71.4092	77.8747	64.8472	75.7601	83.8765	74.7202	85.1338	76.6532
Lmo4	LIM domain only 4	chr2:268752221-268769170	112.793	76.1291	83.4848	-0.567157	-0.434091	-0.133066	0.00525255	0.0775546	0.707646	100.262	98.6146	110.772	127.482	126.833	87.3938	77.4475	70.2139	84.9456	60.6446	93.3432	87.7098	74.1435	78.7427
Smc1a	structural maintenance of chromosomes 1A	chrX:21691591-21736383	71.4059	76.1018	79.3682	0.0918871	0.152518	-0.0606311	0.808804	0.670918	0.89003	62.3856	71.3773	63.2699	70.7797	89.2171	69.0332	77.1731	72.8965	96.5408	64.8654	77.3458	75.5343	81.6402	82.9527
Sf3b2	splicing factor 3b, subunit 2	chr1:227575698-227595347	87.8325	76.0758	83.829	-0.207317	-0.0673054	-0.140011	0.486619	0.875714	0.698609	85.557	87.7739	86.7964	89.059	89.9763	73.5434	70.6194	75.9612	78.3907	81.8645	88.5532	70.1132	86.3479	90.3018
Ndel1	nudE neurodevelopment protein 1-like 1	chr10:55153451-55186676	78.0019	75.8834	86.2279	-0.0397251	0.144646	-0.184371	0.921871	0.681308	0.570341	75.5535	86.5603	92.5582	75.0783	60.2591	74.9084	74.6998	76.7542	68.892	84.1625	75.9712	100.17	92.5946	76.1761
Stip1	stress-induced phosphoprotein 1	chr1:229264911-229283912	130.777	75.8168	163.47	-0.786525	0.32191	-1.10843	0.000653095	0.283811	0.000653095	84.7139	146.454	186.085	142.045	94.5891	75.1753	54.0057	85.5707	61.4206	102.912	158.159	132.647	206.912	156.162
C1qc	complement component 1, q subcomponent, C chain	chr5:159017523-159020850	24.8862	75.6572	21.7244	1.60413	-0.196033	1.80016	0.000653095	0.6146	0.000653095	30.6982	22.5196	24.2523	11.5691	35.392	65.6103	82.1305	87.3361	87.2709	55.9384	20.0676	23.8434	31.4442	11.5423
Nfix	nuclear factor I/X (CCAAT-binding transcription factor)	chr19:36797565-36890319	148.836	75.2343	126.144	-0.984261	-0.238654	-0.745607	0.000653095	0.447932	0.00357487	136.615	184.125	145.784	128.086	149.569	57.9076	76.5244	90.3709	65.1812	86.1876	101.203	85.6663	128.326	189.38
Nfe2l2	nuclear factor, erythroid 2-like 2	chr3:69041646-69069070	51.9607	75.1504	51.6861	0.532361	-0.00764428	0.540005	0.0103657	0.986652	0.017493	58.8663	48.0925	56.4239	50.1165	46.3041	81.9797	65.4352	74.2911	73.787	80.259	45.6075	55.0993	48.3271	57.7105
Col5a1	collagen, type V, alpha 1	chr3:11789104-11935751	86.911	75.1067	67.3553	-0.210596	-0.367746	0.157149	0.516362	0.201168	0.680824	76.0783	90.9949	92.6244	99.4117	75.4455	77.8974	68.4153	84.1157	51.7109	93.3942	61.7619	51.9776	70.7032	84.9787
Klf4	Kruppel-like factor 4 (gut)	chr5:76447642-76452001	56.2086	74.8864	60.8131	0.413912	0.113591	0.300321	0.0835257	0.771248	0.311953	49.4177	64.7976	75.1895	47.4798	44.1586	86.9263	44.0567	102.4	70.3875	70.6619	49.1506	97.1089	67.9023	29.0907
Srpr	signal recognition particle receptor ('docking protein')	chr8:36428865-36434949	70.3232	74.7816	75.8284	0.088681	0.108738	-0.0200565	0.806993	0.777883	0.963831	77.5364	71.6189	68.5594	71.6177	62.2838	83.6655	69.292	76.9855	64.7142	79.2506	67.8177	81.2806	70.7391	83.4764
Ergic3	ERGIC and golgi 3	chr3:157918209-157927936	69.0986	74.7655	65.8733	0.113716	-0.0689632	0.182679	0.735828	0.860616	0.561807	68.4117	72.7862	72.4536	66.8945	64.9471	89.3987	60.7454	87.1944	57.2523	79.2366	61.1715	62.5613	67.5632	72.1972
Twsg1	twisted gastrulation BMP signaling modulator 1	chr9:113230656-113264099	225.007	74.7287	168.624	-1.59023	-0.416159	-1.17407	0.000653095	0.184775	0.000653095	245.709	238.296	237.414	195.75	207.865	72.791	80.0157	79.9255	61.9188	78.9927	193.409	123.851	156.288	200.948
Wdr83os	WD repeat domain 83 opposite strand	chr19:37170094-37171460	92.5176	74.556	90.7112	-0.311404	-0.0284478	-0.282957	0.239043	0.951914	0.333733	105.973	74.2783	116.294	94.0509	71.9925	93.9212	49.6831	80.8624	74.3008	74.0124	96.7449	97.6927	85.984	82.4231
Pcdhgc3	protocadherin gamma subfamily C, 3	chr18:30502813-30662067	77.032	74.4739	70.2091	-0.0487225	-0.133799	0.0850766	0.931267	0.788496	0.878436	84.6935	80.4995	80.4892	69.0876	70.3901	88.7408	62.2519	78.4144	49.2989	93.6635	63.4754	59.641	68.1331	89.587
Upf3b	UPF3 regulator of nonsense transcripts homolog B (yeast)	chrX:123849754-123867683	87.014	74.4326	69.9375	-0.225312	-0.315181	0.0898693	0.43154	0.252159	0.818894	78.3602	87.8137	82.5046	108.445	77.9462	95.2427	79.1523	56.5982	74.9796	66.1904	84.196	63.6657	59.2784	72.6099
Gltscr2	glioma tumor suppressor candidate region gene 2	chr1:79101201-79108671	93.5196	74.4047	80.4747	-0.329876	-0.216733	-0.113142	0.188397	0.481232	0.761188	82.2824	116.453	95.3849	90.0753	83.4023	67.8444	101.651	60.8781	74.5333	67.1163	89.4417	66.9641	77.4847	88.0084
Mdh1	malate dehydrogenase 1, NAD (soluble)	chr14:106449337-106463995	63.6666	74.3061	125.193	0.222943	0.975541	-0.752598	0.458825	0.000653095	0.00121133	56.0695	49.9216	57.188	56.4451	98.7089	54.3583	44.2783	71.0425	138.693	63.1586	96.4313	142.928	183.952	77.4589
Osr1	odd-skipped related transciption factor 1	chr6:45083961-45086319	274.687	74.1454	142.626	-1.88936	-0.945554	-0.943808	0.000653095	0.000653095	0.000653095	241.08	299.965	311.789	219.018	301.586	109.619	60.8825	65.8628	55.4899	78.873	150.223	121.481	99.5586	199.241
Selm	selenoprotein M	chr14:84440339-84442922	53.3412	74.0335	52.8418	0.472927	-0.013571	0.486498	0.0504214	0.977591	0.0535368	57.5392	55.2608	42.3455	62.2462	49.3143	98.7443	56.4922	70.165	53.4248	91.341	53.0043	55.1821	49.0354	54.1453
Ppp1r9b	protein phosphatase 1, regulatory subunit 9B	chr10:82616222-82632356	85.8274	74.0097	75.0462	-0.213724	-0.19366	-0.0200645	0.490266	0.580252	0.968598	87.2338	89.9938	82.9043	88.2815	80.7239	69.2518	69.7621	83.539	69.3494	78.1464	72.5526	74.0032	71.1496	82.4794
Loxl1	lysyl oxidase-like 1	chr8:62843788-62868157	86.8971	73.9992	71.5003	-0.231798	-0.281358	0.0495606	0.431034	0.331708	0.912551	83.7378	80.2018	100.211	98.7194	71.6155	85.8937	50.9579	107.022	48.055	78.0679	66.9129	54.5428	68.7995	95.746
Fkbp10	FK506 binding protein 10	chr10:88119583-88131445	60.2795	73.9898	51.4931	0.295659	-0.227288	0.522947	0.265405	0.45781	0.0308826	76.6193	56.1897	53.6575	69.1185	45.8123	88.6457	75.4035	83.0403	44.4679	78.3913	49.4627	61.4979	41.6161	53.3956
Hspa4	heat shock protein 4	chr10:38383100-38423972	94.695	73.9143	108.096	-0.357435	0.190949	-0.548384	0.179706	0.591651	0.0293662	92.2813	100.871	103.946	87.1091	89.2669	71.2731	68.8852	76.2041	73.721	79.4879	102.916	88.8712	115.081	125.515
Rdx	radixin	chr8:55152376-55194097	86.8116	73.8826	90.1309	-0.232654	0.0541329	-0.286786	0.445879	0.90464	0.350142	73.6284	76.7414	83.3568	86.1414	114.19	69.3615	68.5598	75.3103	89.5929	66.5885	94.9364	67.5029	86.4025	111.682
Cdr2	cerebellar degeneration-related 2	chr1:197815829-197840738	119.502	73.688	113.691	-0.69753	-0.0719099	-0.62562	0.00121133	0.864291	0.00752383	120.622	137.634	141.849	112.481	84.9231	66.7267	107.119	66.5282	54.066	74.0003	105.535	103.058	140.959	105.214
Gm2a	GM2 ganglioside activator	chr10:40277004-40289541	66.7075	73.6494	55.415	0.142823	-0.267573	0.410397	0.65794	0.340885	0.102444	69.251	64.7831	72.0112	64.4002	63.0921	70.6035	72.1649	80.64	84.5139	60.3246	56.8973	53.9591	62.0561	48.7475
Synpo	synaptopodin	chr18:55104199-55125190	59.7494	73.6287	65.338	0.301345	0.128998	0.172347	0.242991	0.741066	0.627538	52.8119	66.5344	51.4323	56.4721	71.4962	57.9562	76.8566	81.1498	63.3065	88.8747	44.5826	45.8081	56.5373	114.424
Ppap2b	phosphatidic acid phosphatase type 2B	chr5:128551195-128626138	114.961	73.6121	71.8787	-0.643125	-0.677503	0.0343775	0.00357487	0.00525255	0.941038	116.196	121.089	148.182	70.8607	118.476	50.63	106.08	72.2558	84.3327	54.7617	74.9675	50.138	80.2728	82.1366
Aup1	ancient ubiquitous protein 1	chr4:178572214-178575203	67.6757	73.4898	58.9875	0.118907	-0.198228	0.317135	0.724265	0.514595	0.235107	64.4869	68.7819	63.6519	81.9939	59.4637	81.3658	68.9549	70.6337	66.6471	79.8474	63.4967	59.417	59.9717	53.0646
Flot2	flotillin 2	chr10:66303608-66327750	100.018	73.4375	94.7276	-0.445667	-0.0783988	-0.367268	0.0541405	0.850921	0.173819	106.313	106.039	107.486	95.4396	84.8117	68.081	96.0422	68.7944	70.8297	63.4401	88.797	100.956	89.9057	99.2516
Sfxn3	sideroflexin 3	chr1:272239229-272247547	66.4795	73.4171	62.0511	0.143206	-0.0994519	0.242658	0.67154	0.794026	0.425464	74.5769	69.6136	66.7693	74.4993	46.9383	88.9583	92.004	62.1655	45.1683	78.7893	67.9194	62.0858	46.4321	71.7672
Chchd3	coiled-coil-helix-coiled-coil-helix domain containing 3	chr4:59822341-60099177	95.245	73.3952	134.451	-0.375957	0.497362	-0.873319	0.124719	0.0417427	0.000653095	100.003	89.1129	79.7732	77.3939	129.942	60.7465	47.857	74.9631	119.327	64.0828	151.527	129.865	169.808	86.6033
Mphosph8	M-phase phosphoprotein 8	chr15:40771172-40799042	78.5291	73.3472	82.9667	-0.0984839	0.0793059	-0.17779	0.783047	0.845899	0.596023	73.9183	76.5949	70.0643	92.791	79.2768	91.1544	71.2923	65.3591	74.0051	64.9253	94.4505	73.9213	78.6592	84.8359
Vdac2	voltage-dependent anion channel 2	chr15:2612541-2629307	105.793	73.2993	105.155	-0.529379	-0.00872645	-0.520652	0.0186805	0.985627	0.0356358	111.991	102.48	100.946	102.327	111.224	73.5131	64.1472	71.8106	90.016	67.0096	114.708	100.624	122.481	82.8089
Fbl	fibrillarin	chr1:86319814-86328915	71.8824	73.2921	77.8754	0.0280194	0.115531	-0.0875114	0.943676	0.755491	0.816347	80.8496	50.9092	64.6118	78.7741	84.2671	78.2925	77.723	68.0709	70.7391	71.6348	89.3316	86.7646	60.6503	74.7552
Idh3g	isocitrate dehydrogenase 3 (NAD), gamma	chr1:152747891-152757622	88.0903	73.2663	154.894	-0.265833	0.814227	-1.08006	0.332829	0.000653095	0.000653095	86.0758	70.4401	67.3378	79.5407	137.057	63.4685	41.7274	75.6943	110.709	74.7321	158.039	145.715	217.655	98.167
Morf4l1	mortality factor 4 like 1	chr8:96974729-96995764	79.0571	73.2351	83.51	-0.11036	0.0790536	-0.189414	0.751731	0.842875	0.547955	86.3428	83.7119	76.8647	70.8744	77.4916	68.8106	71.8296	80.6997	75.9165	68.919	87.2472	77.891	77.8237	91.078
Ndufa4	NADH dehydrogenase (ubiquinone) 1 alpha subcomplex, 4	chr4:38070977-38078251	98.3442	73.1499	151.292	-0.426984	0.621425	-1.04841	0.0716864	0.00860774	0.000653095	106.075	93.9433	94.9046	72.8246	123.974	84.9272	48.6147	76.7419	89.5877	65.8781	161.991	149.728	200.925	92.5252
Hdac2	histone deacetylase 2	chr20:44811966-44835337	87.904	73.1196	84.8613	-0.26567	-0.050822	-0.214848	0.32461	0.904345	0.485124	84.3837	85.403	79.7656	85.8339	104.134	76.1466	66.4659	74.7219	77.215	71.0488	102.912	75.7616	79.1558	81.6159
Idua	iduronidase, alpha-L-	chr14:2037951-2052303	71.8851	73.1047	58.549	0.0242714	-0.296049	0.32032	0.956762	0.293218	0.245513	63.256	81.0149	73.4185	80.4295	61.3066	76.3111	85.1954	67.3336	62.235	74.4483	69.5057	52.3556	52.9955	59.3391
Plvap	plasmalemma vesicle associated protein	chr16:19767917-19780232	24.1941	73.0507	22.4818	1.59424	-0.1059	1.70014	0.000653095	0.798491	0.000653095	19.3684	32.8271	22.9353	23.7901	22.0497	79.3796	75.0133	76.0732	65.7243	69.0634	13.6982	46.2287	18.4039	11.5963
Pnkd	paroxysmal nonkinesigenic dyskinesia	chr9:81327382-81400721	78.5916	72.8399	66.6935	-0.109645	-0.236829	0.127184	0.915955	0.814322	0.906699	85.284	67.7987	79.0604	87.5366	73.2782	78.104	92.8587	60.4122	56.9615	75.8632	72.809	60.4172	64.242	69.3057
Gpnmb	glycoprotein (transmembrane) nmb	chr4:143383025-143404104	13.5647	72.776	18.0921	2.4236	0.415494	2.00811	0.000653095	0.130858	0.000653095	18.9745	16.1457	12.0603	7.83247	12.8108	62.4779	109.851	69.0972	62.0184	60.435	17.8939	21.6776	17.0156	15.7811
Map4k4	mitogen-activated protein kinase kinase kinase kinase 4	chr9:46343467-46467917	54.4011	72.736	66.4747	0.419033	0.289169	0.129864	0.0990132	0.334685	0.73797	39.0115	60.1972	52.6135	46.4072	73.7764	63.3413	94.28	71.7781	69.9739	64.3067	61.8123	59.3332	61.8658	82.8875
Eif3d	eukaryotic translation initiation factor 3, subunit D	chr7:119182950-119195340	78.8486	72.5885	81.9813	-0.119344	0.0562106	-0.175554	0.725687	0.891973	0.587691	64.0097	71.1152	75.1737	86.0314	97.913	77.3612	64.8738	66.2448	80.458	74.0049	90.555	83.96	82.5988	70.8115
Cnpy2	canopy FGF signaling regulator 2	chr7:2716177-2720782	76.8118	72.4326	77.5864	-0.0846885	0.0144764	-0.0991649	0.812737	0.975396	0.792464	81.9248	68.9607	81.1869	67.5269	84.4596	80.8029	50.5962	85.0519	69.8703	75.8416	85.6876	77.5306	81.3421	65.7853
Fgfr1op2	FGFR1 oncogene partner 2	chr4:245046894-245067828	71.7904	72.2874	66.2885	0.0099516	-0.115032	0.124984	0.981067	0.754794	0.735736	76.7755	77.2379	59.5244	79.8549	65.5596	77.7019	74.2333	69.09	66.6413	73.7702	63.8974	70.178	67.1877	63.891
Srsf1	serine/arginine-rich splicing factor 1	chr10:74759411-74765463	100.923	72.2676	95.7851	-0.481837	-0.075386	-0.406451	0.0525431	0.871076	0.147399	102.621	101.467	93.6996	104.809	102.02	70.195	75.6893	70.5509	82.157	62.7461	121.507	93.6422	75.9045	92.0863
Tspan6	tetraspanin 6	chrX:104555350-104562260	34.7442	72.1417	38.6221	1.05406	0.152653	0.901408	0.000653095	0.657084	0.000653095	40.9552	35.919	35.7228	28.7843	32.3398	94.2482	52.0568	68.5892	57.2811	88.5334	37.7967	48.7239	32.7014	35.2663
Bccip	BRCA2 and CDKN1A interacting protein	chr1:212726541-212790818	65.4801	72.1021	80.5232	0.138986	0.298349	-0.159363	0.71485	0.337883	0.674208	59.7781	57.9991	59.2584	74.4999	75.8648	85.5448	54.2	64.7751	84.0033	71.9874	87.5332	84.4129	69.423	80.7239
Safb	scaffold attachment factor B	chr9:9447160-9468034	81.9625	72.0224	78.4423	-0.186517	-0.0633317	-0.123185	0.541483	0.880998	0.737656	73.2931	83.0687	74.3156	94.2031	84.9319	63.1709	76.7514	69.0744	79.8333	71.2822	85.3679	70.7232	80.8518	76.8262
Ivns1abp	influenza virus NS1A binding protein	chr13:73676539-73683832	27.0905	71.9097	46.2926	1.4084	0.772995	0.635404	0.000653095	0.000653095	0.0394609	25.7715	23.6292	24.9626	20.6727	40.4164	30.9126	39.9922	38.5451	213.814	36.2849	55.2856	51.4557	54.6461	23.7831
Creb3	cAMP responsive element binding protein 3	chr5:63558229-63604313	65.6049	71.8805	66.9555	0.131795	0.0293978	0.102397	0.954056	0.991785	0.964978	71.1887	68.4181	64.9297	64.0988	59.3893	82.3254	74.077	70.0276	56.2547	76.7175	65.9399	74.789	66.2108	60.8822
Ilf2	interleukin enhancer binding factor 2	chr2:209288459-209308315	109.131	71.8706	77.9943	-0.602585	-0.484619	-0.117966	0.00441716	0.0461173	0.741066	96.8346	99.8935	105.502	143.403	100.022	88.549	66.4595	62.3223	68.3147	73.7076	92.9505	70.7267	71.4259	76.874
Araf	v-raf murine sarcoma 3611 viral oncogene homolog	chrX:2136335-2206064	88.8248	71.8213	81.8226	-0.30655	-0.118462	-0.188088	0.40767	0.806137	0.725683	87.8967	98.8781	84.2269	97.7541	75.368	71.8304	83.4695	64.1447	68.9049	70.757	98.1626	79.4186	70.181	79.5281
Zmynd11	zinc finger, MYND-type containing 11	chr17:65590222-65676873	74.4893	71.7738	77.8545	-0.0535754	0.0637467	-0.117322	0.894526	0.880447	0.762307	70.5686	77.0607	70.0623	72.8682	81.8867	65.6711	82.628	66.3163	71.6977	72.5562	75.0893	65.2159	81.6339	89.4789
Ssr3	signal sequence receptor, gamma	chr2:175399770-175411015	66.8886	71.7245	71.0589	0.100706	0.0872555	0.0134505	0.776909	0.819599	0.977375	73.565	68.3308	69.6965	63.707	59.1438	73.8436	72.437	74.4415	66.6524	71.2483	63.7969	79.6177	70.1923	70.6288
Rpl23a	ribosomal protein L23a	chr10:66190635-66193322	55.0723	71.6908	64.2776	0.380462	0.22299	0.157472	0.144134	0.511967	0.67071	56.6444	59.9638	56.1603	36.7426	65.8502	79.3689	63.8094	62.5779	78.6465	74.0512	78.551	59.7079	71.8207	47.0308
Ccpg1	cell cycle progression 1	chr8:73373908-73429325	51.2068	71.6469	53.6149	0.48457	0.0662985	0.418272	0.0331831	0.870662	0.0955352	52.7252	49.5258	45.6683	50.7281	57.3864	59.1255	85.8069	67.6129	78.1371	67.5523	51.9103	48.9689	53.7227	59.8577
Ppp1r15a	protein phosphatase 1, regulatory subunit 15A	chr1:102590676-102593734	115.701	71.6297	115.777	-0.691771	0.000950289	-0.692722	0.00121133	0.998102	0.00221111	113.168	134.227	121.709	117.956	91.4444	67.6911	84.6533	66.4642	62.9233	76.4164	90.3612	118.176	151.807	102.765
Rab8a	RAB8A, member RAS oncogene family	chr16:19213377-19235107	78.9935	71.5896	69.2948	-0.141984	-0.188987	0.0470034	0.660124	0.548695	0.911361	76.5672	75.5928	80.9032	85.1989	76.7055	79.1063	70.4857	73.4541	64.2868	70.6152	68.6741	73.9267	67.8382	66.7402
Sorbs3	sorbin and SH3 domain containing 3	chr15:55585614-55616959	71.5973	71.5809	56.6243	-0.000330121	-0.338484	0.338154	0.999024	0.211141	0.207281	80.8282	70.5117	69.4566	73.4851	63.7048	76.8298	77.1998	64.4031	60.1234	79.3484	52.4585	46.8483	50.3874	76.803
Psmd2	proteasome (prosome, macropain) 26S subunit, non-ATPase, 2	chr11:87006145-87016773	71.2614	71.5424	82.2936	0.00567878	0.20766	-0.201981	0.989373	0.505856	0.528029	73.1054	66.9094	66.9264	73.8149	75.5508	70.1667	77.3277	67.2317	64.1569	78.8292	78.0183	84.8565	83.8941	82.4053
Arhgdib	Rho, GDP dissociation inhibitor (GDI) beta	chr4:235170744-235189397	54.8386	71.5247	41.8882	0.38325	-0.388646	0.771897	0.103335	0.139026	0.000653095	56.5442	54.8696	66.2538	35.8972	60.6281	68.1884	64.0543	91.9655	74.895	58.5201	43.5253	42.573	50.273	31.1816
Vcp	valosin-containing protein	chr5:62951998-62971402	84.1302	71.4834	90.1879	-0.235015	0.10031	-0.335325	0.41262	0.798336	0.225677	91.2287	90.66	86.3698	77.0041	75.3884	74.0728	68.3434	69.655	67.5845	77.7614	94.7137	93.2036	90.6801	82.1541
Smarce1	SWI/SNF related, matrix associated, actin dependent regulator of chromatin, subfamily e, member 1	chr10:86912863-86933996	71.234	71.4073	73.3463	0.00350526	0.0421595	-0.0386542	0.993906	0.922782	0.924891	60.3488	68.325	74.7319	73.9239	78.8401	70.6196	78.0126	63.798	75.0004	69.6057	77.6073	69.8299	71.0233	74.9248
Mir145	microRNA 145	chr18:56198819-56198907	149.069	71.3712	98.1678	-1.06257	-0.602662	-0.459908	0.000653095	0.0872936	0.311237	203.955	149.455	81.8038	195.404	114.729	79.2211	105.686	37.1359	58.7546	76.0579	123.727	109.335	56.1348	103.474
Uqcr11	ubiquinol-cytochrome c reductase, complex III subunit XI	chr7:12341263-12345892	102.053	71.2762	142.387	-0.517821	0.4805	-0.99832	0.0303398	0.0541405	0.000653095	87.1549	83.1186	67.1487	125.197	147.644	75.4977	45.7615	76.6558	90.7089	67.7572	148.325	127.693	190.073	103.456
Txndc5	thioredoxin domain containing 5 (endoplasmic reticulum)	chr17:28841030-28869179	66.1617	71.2101	65.1209	0.106086	-0.0228746	0.128961	0.764003	0.959237	0.727689	76.1389	56.1657	70.7263	70.5189	57.2585	75.4517	56.5126	89.1035	53.5237	81.459	61.9073	65.0349	60.5726	72.9688
Pgm5	phosphoglucomutase 5	chr1:249856474-250039462	81.0554	71.0944	106.61	-0.189174	0.395363	-0.584536	0.541417	0.141448	0.0180884	107.158	73.5765	68.9095	80.3248	75.3079	52.6847	127.368	53.9714	54.4408	67.0069	88.0021	70.4412	93.6388	174.358
Litaf	lipopolysaccharide-induced TNF factor	chr10:3580243-3589969	33.5995	71.0724	38.2112	1.08085	0.185556	0.895296	0.000653095	0.562282	0.000653095	34.3353	34.1175	36.8222	28.4168	34.3056	70.3808	84.5961	74.0514	55.2605	71.0735	37.2566	39.864	35.6277	40.0964
Mmp23	matrix metallopeptidase 23	chr5:176554524-176557154	63.2881	71.0381	53.8468	0.166658	-0.233073	0.399731	0.594629	0.431932	0.114809	69.3085	54.9199	66.4083	75.909	49.8949	94.7553	57.2552	77.0323	49.0397	77.1079	52.2545	58.8282	47.2924	57.0123
Tm4sf1	transmembrane 4 L six family member 1	chr2:166792814-166802011	30.0576	71.0239	32.507	1.24058	0.113021	1.12755	0.000653095	0.773626	0.000653095	17.3037	22.8033	32.4866	23.5152	54.1791	84.6735	50.8049	91.6704	72.916	55.055	32.7313	45.3938	25.7126	26.1904
Mgst1	microsomal glutathione S-transferase 1	chr4:236372224-236387452	41.6399	70.9359	98.1356	0.768548	1.23681	-0.468261	0.00267407	0.000653095	0.128809	36.2546	23.6335	46.873	22.9998	78.4386	41.1307	30.5181	59.4833	189.673	33.874	78.3397	111.592	157.352	45.2584
Akap8	A kinase (PRKA) anchor protein 8	chr7:14477684-14493949	73.9453	70.9262	67.436	-0.0601399	-0.132938	0.0727985	0.878967	0.718124	0.859204	67.305	77.1835	70.9734	83.0589	71.2056	73.5345	72.7335	67.8906	75.9766	64.4956	80.091	70.1568	54.7908	64.7056
Gpx8	glutathione peroxidase 8	chr2:63940890-63944583	58.3657	70.8598	56.116	0.279847	-0.0567098	0.336557	0.289054	0.892463	0.20525	72.0627	49.8788	56.5405	56.9319	56.4146	83.6893	71.65	86.55	46.5513	65.8585	64.0489	61.6647	47.257	51.4932
Pes1	pescadillo ribosomal biogenesis factor 1	chr14:84895324-84911706	65.1152	70.8579	65.7584	0.121934	0.0141814	0.107752	0.718361	0.974246	0.767572	54.9464	63.4103	63.7891	72.1452	71.285	69.3695	79.9417	67.1154	72.6019	65.2609	72.0628	66.7134	57.0076	67.25
Gng8	guanine nucleotide binding protein (G protein), gamma 8	chr1:80067666-80069629	75.2815	70.774	58.6781	-0.0890764	-0.359472	0.270396	0.82087	0.21274	0.396712	50.639	65.984	59.9894	99.9923	99.8027	98.2818	52.7119	71.7783	50.7808	80.3171	71.7372	48.1075	56.8967	57.9712
Gls	glutaminase	chr9:53923144-53995543	101.788	70.5976	82.2073	-0.527884	-0.308236	-0.219648	0.0248752	0.319158	0.511239	92.9537	104.27	108.081	119.958	83.6797	82.8122	69.8859	69.6588	54.9065	75.7244	95.0906	63.292	72.8936	97.553
Zranb2	zinc finger, RAN-binding domain containing 2	chr2:282777939-282791430	67.9275	70.4398	75.6557	0.0523946	0.155453	-0.103058	0.893887	0.660923	0.791259	54.3754	65.3739	66.7933	67.9759	85.1191	77.3054	67.4719	64.2032	78.8864	64.3319	91.2274	69.3592	61.0598	80.9763
Rbbp7	retinoblastoma binding protein 7	chrX:33995672-34012812	71.0701	70.3522	81.0979	-0.014646	0.190421	-0.205067	0.972329	0.549591	0.502673	75.4526	71.6876	70.9136	68.8206	68.476	69.8711	66.4825	72.9424	71.1465	71.3187	77.9414	78.8443	79.0327	88.573
LOC681996	NA	chr6:120578427-120586235	102.565	70.3393	148.064	-0.544134	0.529685	-1.07382	0.0120346	0.0282974	0.000653095	78.708	108.509	125.585	100.481	99.5412	54.8663	64.2449	79.8782	70.3303	82.3765	159.248	121.739	174.369	136.9
Ube2q1	ubiquitin-conjugating enzyme E2Q family member 1	chr2:208528889-208537961	54.4305	70.2357	51.3797	0.367789	-0.0832175	0.451007	0.11936	0.827791	0.0615995	48.6423	55.4238	60.5203	57.3086	50.2575	71.2325	67.7669	68.1427	65.9997	78.0367	50.8764	53.2163	52.5954	48.8307
Eif3j	eukaryotic translation initiation factor 3, subunit J	chr3:120516660-120538897	84.5405	70.1731	80.9774	-0.268725	-0.0621245	-0.206601	0.310585	0.880447	0.506007	91.4725	98.7968	79.6771	75.3901	77.3661	67.798	69.8104	65.0707	82.1783	66.008	90.9108	73.5013	71.9318	87.5655
Ctnnd1	catenin (cadherin associated protein), delta 1	chr3:78522965-78573636	92.2971	70.1524	83.1257	-0.395793	-0.15099	-0.244803	0.123823	0.688022	0.445504	80.4854	99.7271	95.6383	98.767	86.8678	68.7779	79.4716	66.5055	69.6419	66.3652	83.6266	77.2648	84.3493	87.2622
Penk	proenkephalin	chr5:21834415-21839358	5.52339	70.0008	12.7542	3.66374	1.20734	2.4564	0.000653095	0.000653095	0.000653095	8.66456	3.45539	3.97171	7.29783	4.22746	72.8776	51.5914	98.0387	51.6102	75.8858	15.5357	20.2383	7.32463	7.91802
Lrp1	low density lipoprotein receptor-related protein 1	chr7:71018807-71099367	58.001	69.9842	57.1051	0.270953	-0.0224571	0.29341	0.417292	0.966236	0.418056	50.7189	64.1229	61.8078	52.1398	61.2154	59.9229	77.4433	66.8072	68.3091	77.4386	48.5576	46.0673	67.229	66.5665
Pa2g4	proliferation-associated 2G4	chr7:2953210-2960679	61.423	69.9157	71.5652	0.186837	0.220478	-0.0336407	0.520636	0.458154	0.938694	60.6629	53.915	57.6264	67.7893	67.1215	65.0383	73.2173	61.6635	82.8136	66.8459	62.2565	72.1307	78.9311	72.9424
Ddah2	dimethylarginine dimethylaminohydrolase 2	chr20:7122456-7125503	191.911	69.9096	126.264	-1.45687	-0.603996	-0.852877	0.000653095	0.0113953	0.000653095	164.006	218.494	174.694	213.092	189.267	76.598	67.8822	79.5332	57.3454	68.189	146.558	102.985	119.402	136.109
Anxa7	annexin A7	chr15:8355755-8382544	59.5033	69.8782	65.8529	0.231873	0.146278	0.0855949	0.409723	0.678394	0.82721	76.3827	57.5472	65.2437	49.5166	48.8262	73.1471	73.0074	64.7972	65.0706	73.3687	69.1985	74.966	54.15	65.0971
Becn1	beclin 1, autophagy related	chr10:88998373-89024328	62.7969	69.8132	62.0655	0.152806	-0.0169026	0.169708	0.636985	0.969993	0.609042	70.5529	58.5456	62.3475	66.369	56.1697	80.4082	80.3021	70.4975	53.7544	64.1038	66.0541	73.3373	55.654	53.2165
Ndufa6	NADH dehydrogenase (ubiquinone) 1 alpha subcomplex, 6 (B14)	chr7:123567780-123571638	99.7039	69.7973	124.044	-0.514479	0.315128	-0.829607	0.0261852	0.251114	0.000653095	88.8721	105.391	100.253	86.1354	117.868	90.8425	42.2354	64.4742	77.9008	73.5334	136.526	120.036	146.189	93.4234
Ibsp	integrin-binding sialoprotein	chr14:6789268-6802232	2.44083	69.7822	8.45228	4.83742	1.79197	3.04545	0.000653095	0.000653095	0.000653095	3.15529	0.809577	3.7222	2.27979	2.2373	78.1647	79.6604	49.1714	61.3481	80.5663	7.76519	9.7011	4.46989	11.8729
Rap1b	RAP1B, member of RAS oncogene family	chr7:60853892-60860953	47.7909	69.7523	58.2707	0.545506	0.286037	0.259469	0.0254298	0.386623	0.413555	47.8614	54.7298	50.1533	38.1328	48.077	60.8226	63.387	82.4349	63.0059	79.1111	41.9418	58.9425	69.4251	62.7735
Enah	enabled homolog (Drosophila)	chr13:105280247-105385633	102.765	69.7188	127.635	-0.559736	0.312668	-0.872404	0.0120346	0.298807	0.000653095	122.257	95.5598	104.435	116.029	75.5461	63.5052	81.446	69.7914	53.778	80.0732	118.752	78.3938	103.622	209.771
Osbpl9	oxysterol binding protein-like 9	chr5:132534673-132679334	64.9272	69.6477	67.0681	0.101253	0.0468043	0.0544486	0.773626	0.914246	0.895053	64.9434	74.3947	64.0238	58.0146	63.2592	69.0655	71.5324	67.7241	71.8112	68.1052	66.2796	64.1785	57.5054	80.3088
Hm13	histocompatibility 13	chr3:154555180-154594098	53.2978	69.6333	50.1714	0.385701	-0.0872096	0.472911	0.0998501	0.817262	0.0501882	59.5688	51.0659	61.7133	53.2134	40.9276	87.7758	65.6512	81.9337	47.7981	65.0076	50.1675	54.6048	41.8753	54.0382
Cd200	Cd200 molecule	chr11:64474113-64501029	23.2248	69.6223	26.4825	1.58388	0.189376	1.39451	0.000653095	0.585051	0.000653095	31.9611	30.8241	19.5402	18.1493	15.6492	71.4137	86.6626	63.897	48.2766	77.8615	22.0061	44.3407	16.0242	23.5592
Vdac3	voltage-dependent anion channel 3	chr16:73924416-73940566	88.3193	69.5274	103.578	-0.345148	0.229917	-0.575064	0.14713	0.442679	0.0113953	98.3055	84.8387	83.1572	78.6647	96.6306	68.6962	66.2066	68.3824	83.4162	60.9356	105.026	110.555	111.528	87.2028
H1f0	H1 histone family, member 0	chr7:120252160-120254016	52.8011	69.5168	50.2395	0.396793	-0.0717463	0.468539	0.0898209	0.857011	0.0459174	53.1864	47.5791	44.7335	41.5729	76.9336	77.4958	69.936	73.0712	66.7854	60.2955	52.595	38.6208	47.2428	62.4994
Akr1cl	aldo-keto reductase family 1, member C-like	chr17:71538482-71565238	30.1976	69.3505	73.532	1.19947	1.28394	-0.0844665	0.000653095	0.000653095	0.860823	33.0839	17.5573	24.3275	31.155	44.8645	27.0539	52.7973	34.3863	200.437	32.0775	83.9133	73.8979	96.1794	40.1374
Map1lc3b	microtubule-associated protein 1 light chain 3 beta	chr19:64373067-64381400	56.0199	69.3091	51.2211	0.307106	-0.129201	0.436307	0.216395	0.709991	0.0711405	59.6895	57.9964	54.761	56.3779	51.2748	73.4258	89.4982	61.8363	60.0738	61.7115	52.7434	51.5832	50.8432	49.7146
Atp5o	ATP synthase, H+ transporting, mitochondrial F1 complex, O subunit	chr11:35685315-35691628	107.101	69.2187	120.743	-0.629741	0.172964	-0.802704	0.00267407	0.596992	0.000653095	119.823	101.872	99.1056	103.524	111.182	77.847	51.4751	67.9476	82.1768	66.6469	124.795	134.048	155.812	68.3167
Anapc5	anaphase-promoting complex subunit 5	chr12:40918048-41191356	72.5756	69.2106	72.9847	-0.0684906	0.00811032	-0.0766009	0.881532	0.988163	0.876781	67.8744	67.5566	80.7979	75.7233	70.9258	74.0356	63.289	72.1605	62.276	74.2922	70.5154	65.9342	73.7636	81.7257
Polr3gl	polymerase (RNA) III (DNA directed) polypeptide G-like	chr2:218189524-218206136	79.32	68.9097	68.6559	-0.202978	-0.2083	0.00532237	0.474889	0.489995	0.990884	70.5595	76.6062	77.0336	83.2621	89.1385	78.423	68.0305	58.3464	79.7693	59.9793	77.9899	63.5928	71.8719	61.1692
Bcl7b	B-cell CLL/lymphoma 7B	chr12:26541050-26554396	76.6065	68.8755	65.8652	-0.153477	-0.217952	0.064475	0.623266	0.478475	0.874704	73.4377	75.7289	73.1562	85.9081	74.8018	67.0757	77.8606	64.4228	66.7451	68.2734	54.2193	65.338	75.1595	68.7438
Ppp1ca	protein phosphatase 1, catalytic subunit, alpha isozyme	chr1:226310603-226314221	70.6378	68.8555	67.5869	-0.0368697	-0.0636969	0.0268271	0.923974	0.878055	0.95065	75.2991	71.9872	70.3324	80.1368	55.4336	78.8137	60.1319	68.3172	58.1592	78.8554	73.9027	78.4512	59.9739	58.02
Trip10	thyroid hormone receptor interactor 10	chr9:8696541-8709681	75.8428	68.7751	71.6648	-0.141126	-0.0817477	-0.0593781	0.661797	0.831215	0.885616	61.1484	91.0304	76.7307	87.4131	62.8915	65.704	61.5952	71.2491	64.0763	81.251	77.9271	67.9658	71.944	68.8223
Nudt3	nudix (nucleoside diphosphate linked moiety X)-type motif 3	chr20:9358098-9410646	78.6966	68.7425	79.3683	-0.195099	0.0122625	-0.207362	0.507587	0.979671	0.500965	81.0668	74.9783	70.8569	84.7988	81.7823	65.9349	73.6459	75.7074	61.7208	66.7034	82.602	76.1683	79.2921	79.4109
Ctsh	cathepsin H	chr8:96939739-96958827	47.6469	68.7317	37.7873	0.528594	-0.33448	0.863073	0.014794	0.227036	0.000653095	57.0533	41.7065	56.8553	31.146	51.4732	72.3578	56.5338	90.1754	60.1722	64.4192	35.9147	33.6292	40.5294	41.0758
Lsm12	LSM12 homolog (S. cerevisiae)	chr10:89892924-89914903	102.927	68.6823	81.8219	-0.583617	-0.331067	-0.25255	0.00677966	0.227539	0.387939	108.941	93.4948	103.76	107.563	100.878	89.1839	58.4646	64.8033	65.0473	65.9123	89.9124	91.9512	75.9554	69.4687
Sra1	steroid receptor RNA activator 1	chr18:29199077-29202306	61.4932	68.6316	54.0558	0.158446	-0.185977	0.344423	0.625709	0.568308	0.212632	60.3424	59.3895	56.3694	72.6933	58.6716	95.6835	66.2322	71.8387	48.5312	60.8725	54.6178	68.4288	51.3682	41.8085
Arf3	ADP-ribosylation factor 3	chr7_AABR06109980_random:7146-12932	81.5244	68.6196	77.8593	-0.248611	-0.0663627	-0.182249	0.386324	0.876781	0.584419	96.7271	80.4766	77.2127	87.2971	65.9085	73.9863	77.3557	75.5367	46.9269	69.2922	76.277	76.6677	72.0397	86.4528
Trappc1	trafficking protein particle complex 1	chr10:55667070-55668657	63.2777	68.5868	59.2461	0.116234	-0.0949769	0.211211	0.753083	0.821264	0.533224	52.865	63.1983	58.4624	76.959	64.904	83.3906	63.228	58.229	65.5578	72.5288	73.0415	52.4809	61.0747	50.3874
Luc7l	LUC7-like (S. cerevisiae)	chr10:15435861-15462628	80.7329	68.5692	62.8321	-0.235595	-0.361654	0.126058	0.39491	0.169428	0.727689	75.0191	87.1979	84.3284	92.9181	64.2009	80.9663	64.2074	60.8569	66.6416	70.1739	73.6429	71.8945	49.1679	56.6233
Sulf1	sulfatase 1	chr5:10835825-11022624	16.8818	68.5341	20.8589	2.02135	0.305188	1.71616	0.000653095	0.272466	0.000653095	11.9153	18.8641	19.7064	13.4431	20.4803	63.7845	88.6879	65.2466	55.5026	69.4489	15.8783	26.8513	18.2193	22.4866
R3hdm2	R3H domain containing 2	chr7:70870218-70978626	67.2353	68.4263	66.9459	0.0253314	-0.00622392	0.0315553	0.953677	0.989495	0.945393	58.9323	71.1388	72.5126	67.5608	66.0321	65.6261	83.4421	62.5501	64.69	65.8232	65.147	61.3865	73.1881	68.062
Ppt1	palmitoyl-protein thioesterase 1	chr5:144329262-144349162	58.0428	68.3957	57.9909	0.236789	-0.00128995	0.238079	0.390586	0.997245	0.41433	55.2894	63.1675	63.7886	51.0202	56.9482	68.5642	60.386	81.7628	59.4678	71.7977	55.1869	54.9155	54.072	67.7891
Srgn	serglycin	chr20:33908570-33921685	50.3721	68.3562	47.7179	0.440447	-0.0780946	0.518542	0.0514658	0.846101	0.0259303	60.4301	48.3443	53.6135	42.7571	46.7156	81.411	81.2495	62.8746	53.7286	62.5173	53.5937	63.8199	35.0658	38.3923
Vasn	vasorin	chr10:9855557-9909647	103.332	68.2483	87.979	-0.598425	-0.23206	-0.366366	0.0226298	0.521637	0.249838	109.169	104.381	109.86	114.131	79.1191	70.3294	63.9248	75.4052	52.4085	79.1735	69.0856	67.2697	83.5936	131.967
Copa	coatomer protein complex subunit alpha	chr13:94990248-95030030	78.4199	68.2297	74.9473	-0.20082	-0.0653435	-0.135477	0.521751	0.883317	0.721511	85.1033	80.8276	73.7319	83.767	68.6697	70.3806	65.1755	72.173	59.6638	73.7556	66.4371	81.389	73.1267	78.8362
Utp3	UTP3, small subunit (SSU) processome component, homolog (S. cerevisiae)	chr14:21063824-21065479	69.9797	68.1919	80.3464	-0.0373364	0.199297	-0.236634	0.927429	0.520953	0.429295	60.2966	69.2513	69.305	78.0585	72.987	69.1714	67.6792	67.1363	77.2807	59.6919	85.9785	81.0997	75.3665	78.941
C1qb	complement component 1, q subcomponent, B chain	chr5:159008942-159014492	21.1111	68.1405	19.2586	1.69051	-0.132498	1.82301	0.000653095	0.7649	0.000653095	27.6893	18.9167	18.7328	7.37583	32.8407	62.4035	70.6512	87.1658	64.9968	55.4855	18.8421	18.778	26.1684	13.2458
Mbrl	membralin	chr7:12711158-12963838	67.9162	67.9942	62.1581	0.00165444	-0.127813	0.129467	0.998284	0.901769	0.904644	65.9493	76.6075	62.4451	77.9974	56.5819	69.9148	75.0795	69.1176	53.7092	72.1497	61.6597	64.9405	66.0815	55.9509
Ggt5	gamma-glutamyltransferase 5	chr20:16178487-16191043	55.9947	67.9517	49.7947	0.279219	-0.169297	0.448515	0.30056	0.617175	0.0736374	52.1965	50.8764	65.1063	66.9783	44.8159	96.5732	68.9819	59.9966	42.0017	72.2049	64.3536	50.804	44.1418	39.8795
Fmo1	flavin containing monooxygenase 1	chr13:85607545-85639778	46.0183	67.792	62.2707	0.558908	0.436346	0.122562	0.0322004	0.0826826	0.771821	50.0997	35.1176	42.7741	36.0588	66.0412	38.6325	57.427	42.4098	163.649	36.8415	67.2937	58.1908	80.5571	43.0411
Tp53	tumor protein p53	chr10:55932657-55944087	63.8688	67.7618	58.7208	0.0853621	-0.121239	0.206601	0.810916	0.739738	0.505838	78.2926	58.8483	58.213	70.8069	53.1832	86.2969	69.3132	58.6222	52.7671	71.8097	60.2939	67.3944	52.1837	55.0113
Fkbp3	FK506 binding protein 3	chr6:96299843-96311094	67.6947	67.7284	61.8577	0.000719662	-0.130088	0.130808	0.998239	0.713356	0.719534	85.8383	62.3566	63.015	72.0793	55.1841	64.131	97.0476	56.834	59.8678	60.7616	67.907	61.494	52.6203	65.4097
Msrb1	methionine sulfoxide reductase B1	chr10:13921477-13927191	77.4559	67.6262	65.9214	-0.195793	-0.232629	0.036836	0.516385	0.445525	0.933261	93.4449	68.5901	66.5938	103.654	54.9964	96.779	72.3406	62.9606	45.8745	60.1764	64.1532	81.0987	67.13	51.3037
Syngr2	synaptogyrin 2	chr10:106451967-106455900	59.2286	67.5711	57.9084	0.190113	-0.0325207	0.222634	0.519924	0.942043	0.477462	66.6858	56.1798	61.6452	66.4643	45.1679	79.8496	74.6917	63.8327	50.9876	68.4941	47.0305	58.73	58.2086	67.6646
Cdh11	cadherin 11	chr19:2374107-2531571	45.7564	67.571	49.9305	0.562431	0.125947	0.436483	0.0138951	0.737342	0.097922	43.3	46.9142	55.1072	37.2469	46.2136	66.3191	67.0685	76.2502	54.157	74.06	53.7079	48.1726	45.2638	52.5776
Cited2	Cbp/p300-interacting transactivator, with Glu/Asp-rich carboxy-terminal domain, 2	chr1:14515628-14518072	53.2919	67.4995	50.7846	0.34096	-0.0695244	0.410484	0.208908	0.870245	0.110294	101.18	28.7858	45.3348	49.0398	42.1193	66.1534	107.612	37.8412	66.2004	59.6906	44.4282	66.212	51.6817	40.8166
Zfand3	zinc finger, AN1-type domain 3	chr20:10942041-11081447	64.2277	67.4884	70.1163	0.071445	0.126555	-0.0551102	0.847591	0.729406	0.896705	63.4865	60.596	69.1014	55.779	72.1756	56.9541	68.1514	75.2052	60.9255	76.206	62.6526	57.0564	80.6865	80.0699
Eif3m	eukaryotic translation initiation factor 3, subunit M	chr3:101614557-101632161	79.7143	67.4436	78.3545	-0.241156	-0.0248217	-0.216334	0.380722	0.95591	0.476312	90.7387	87.6207	94.2282	57.4796	68.504	68.542	70.3943	63.1251	80.0372	55.1196	85.356	78.3946	73.8231	75.8443
Cstb	cystatin B (stefin B)	chr20:13137895-13139938	61.9213	67.4349	70.1927	0.123061	0.180886	-0.0578247	0.740654	0.607609	0.897282	63.0188	65.755	75.1675	48.5685	57.0966	80.2043	61.9423	51.7473	55.2684	88.0124	60.7436	83.6292	77.7965	58.6015
Hsph1	heat shock 105/110 protein 1	chr12:8423545-8442481	207.809	67.4097	266.116	-1.62423	0.3568	-1.98103	0.000653095	0.38718	0.000653095	83.5303	339.659	402.849	137.101	75.9055	56.6715	56.0798	72.3244	46.8375	105.135	217.156	195.661	408.675	242.973
Pdzrn3	PDZ domain containing RING finger 3	chr4:198194464-198429508	58.7515	67.4095	82.5414	0.198325	0.490493	-0.292167	0.522335	0.0666457	0.365775	58.8301	61.5242	59.1371	67.1843	47.0818	63.9995	88.0648	64.8468	45.4989	74.6373	72.3853	59.6335	65.9536	132.193
Rnf187	ring finger protein 187	chr10:45030945-45036845	84.3141	67.3881	74.5026	-0.323281	-0.178484	-0.144797	0.190981	0.582979	0.674406	95.4823	76.8371	77.1519	89.5345	82.5648	76.8375	62.0126	73.6198	53.9648	70.5058	76.8366	74.0311	64.6545	82.4881
Gng12	guanine nucleotide binding protein (G protein), gamma 12	chr4:162442923-162545978	68.2772	67.2673	83.997	-0.0214991	0.298934	-0.320433	0.959967	0.292204	0.252101	79.5999	68.5556	57.617	62.2755	73.3378	69.9633	73.1056	67.8516	62.2662	63.1495	60.9836	98.5253	84.7731	91.7059
F2r	coagulation factor II (thrombin) receptor	chr2:45254488-45257761	34.9873	67.1496	38.4843	0.940549	0.137438	0.80311	0.000653095	0.694607	0.000653095	37.9469	35.8781	42.0824	34.3514	24.6775	61.5455	84.0111	65.7985	56.8281	67.5649	32.6925	38.6565	40.3732	42.2149
Il6st	interleukin 6 signal transducer	chr2:63332283-63361404	49.0268	67.1452	47.2618	0.453713	-0.0528961	0.506609	0.0826826	0.906715	0.0664453	48.9754	50.0762	50.4124	41.3465	54.3237	50.6519	93.0354	69.8398	70.5507	51.6483	47.5479	49.8888	45.2965	46.3141
Tes	testis derived transcript	chr4:44929780-44968306	121.654	67.0904	139.187	-0.858601	0.194248	-1.05285	0.000653095	0.575282	0.000653095	153.602	114.4	117.899	125.096	97.2721	67.9536	88.909	59.8319	52.987	65.7706	154.465	104.148	118.014	180.122
Mbnl2	muscleblind-like splicing regulator 2	chr15:109043304-109200834	55.896	66.993	56.8605	0.261266	0.0246838	0.236582	0.369765	0.957934	0.455958	70.6318	54.0942	60.7886	45.9302	48.035	63.3033	78.2414	66.3726	59.459	67.5887	54.2795	53.266	49.0858	70.8108
Rassf3	Ras association (RalGDS/AF-6) domain family member 3	chr7:63737799-63801753	70.4197	66.9808	85.9195	-0.0722315	0.287006	-0.359238	0.855538	0.338074	0.199045	60.0085	58.1554	76.4364	64.9975	92.5008	65.8	100.784	65.8558	48.594	53.8702	98.5977	62.2912	83.0318	99.7574
Ctss	cathepsin S	chr2:217142222-217169058	19.5949	66.9758	15.4018	1.77316	-0.347377	2.12054	0.000653095	0.289599	0.000653095	22.3203	17.3376	24.936	11.2669	22.1138	55.3191	67.509	96.3129	70.8132	44.9247	17.9089	13.9323	19.9867	9.77949
Rock2	Rho-associated coiled-coil containing protein kinase 2	chr6:51900047-52009234	57.3545	66.975	76.0749	0.223715	0.407514	-0.183799	0.478088	0.156311	0.629234	57.6217	58.6802	62.3948	56.669	51.4068	64.051	82.7619	58.5912	55.8802	73.5906	75.1198	70.4044	61.1231	97.6524
Flii	flightless I homolog (Drosophila)	chr10:46728478-46742400	69.9817	66.9243	69.4539	-0.0644491	-0.0109217	-0.0535274	0.871769	0.981183	0.903543	65.9589	71.2404	61.0692	80.2458	71.3944	67.88	73.7966	65.0323	58.3711	69.5412	58.9452	69.5154	67.7996	81.5556
Crtc2	CREB regulated transcription coactivator 2	chr2:209048915-209058502	74.1382	66.9147	65.0581	-0.147894	-0.188488	0.0405933	0.642105	0.558504	0.92389	81.574	77.3438	69.3186	87.2481	55.2064	75.0796	74.5652	64.6668	55.6831	64.5785	68.3288	63.9272	63.7402	64.2362
Phlda3	pleckstrin homology-like domain, family A, member 3	chr13:57637216-57640302	49.4075	66.9092	64.0107	0.437474	0.373581	0.0638931	0.0571433	0.144557	0.874524	47.6429	44.6407	38.7572	52.9464	63.0504	80.1346	49.4098	63.1101	77.9688	63.9228	65.6505	57.4317	78.7464	54.214
Ssu72	SSU72 RNA polymerase II CTD phosphatase homolog (S. cerevisiae)	chr5:176628573-176658330	49.6727	66.866	59.3607	0.42882	0.257056	0.171764	0.0655339	0.386416	0.603531	51.8229	50.3322	42.4949	53.0451	50.6683	77.339	64.9942	71.3981	56.1801	64.4186	57.094	58.3402	63.7095	58.2992
Fgl2	fibrinogen-like 2	chr4:10213208-10414946	118.984	66.8364	90.8215	-0.832056	-0.389657	-0.442399	0.000653095	0.191047	0.103806	155.131	129.481	120.986	93.2443	96.0759	60.706	88.472	67.0759	56.9601	60.9682	85.6015	103.041	76.4455	98.198
Atp5g2	ATP synthase, H+ transporting, mitochondrial Fo complex, subunit C2 (subunit 9)	chr7:142056424-142064796	81.0799	66.7923	77.1868	-0.279662	-0.0709902	-0.208672	0.309588	0.86253	0.516147	93.7668	88.8246	83.8314	77.7247	61.252	77.6174	79.7066	60.7505	55.8208	60.0662	92.0567	77.0954	79.9561	59.6389
Slu7	SLU7 splicing factor homolog (S. cerevisiae)	chr10:28871471-28886424	69.3521	66.5284	64.2312	-0.0599683	-0.110666	0.0506981	0.877115	0.767572	0.904609	71.2829	66.3489	69.1368	72.7034	67.2887	61.641	76.1769	61.5639	69.1776	64.0828	66.7351	54.5901	53.6466	81.9529
Olr1	oxidized low density lipoprotein (lectin-like) receptor 1	chr4:211883404-211905489	0.234986	66.4868	3.72881	8.14435	3.98807	4.15628	0.000653095	0.000653095	0.000653095	0.0956972	0.417415	0.255887	0.117545	0.288385	94.5909	43.8754	74.7509	27.8583	91.3587	1.20111	11.671	0.98771	1.05545
Mrpl52	mitochondrial ribosomal protein L52	chr15:36955393-36958618	97.2762	66.4623	81.7117	-0.54955	-0.251544	-0.298005	0.0103657	0.391542	0.291254	114.247	98.7223	112.751	88.979	71.6811	83.2566	69.4241	64.3092	50.2724	65.0493	102.155	78.7302	64.4761	81.4856
Pmvk	phosphomevalonate kinase	chr2:208198237-208207794	110.648	66.4209	99.3383	-0.736266	-0.155554	-0.580712	0.000653095	0.646133	0.010049	91.3047	112.732	118.625	116.672	113.906	78.6523	68.8458	67.035	53.8671	63.7045	123.994	85.8534	78.2779	109.228
Erp29	endoplasmic reticulum protein 29	chr12:42486491-42492999	64.5389	66.4139	61.2561	0.0413167	-0.0753155	0.116632	0.918869	0.850285	0.747498	55.2246	57.3525	60.6487	75.5039	73.9646	77.6174	47.3981	83.4945	52.7058	70.8536	68.7632	66.9628	55.6413	53.6569
Pofut2	protein O-fucosyltransferase 2	chr20:14281734-14292670	65.2104	66.3951	56.9144	0.0259739	-0.196308	0.222282	0.949688	0.536518	0.473321	63.748	61.0202	68.2254	80.8401	52.2183	77.3487	58.5595	77.5742	39.4089	79.084	57.6971	63.49	48.7861	57.6844
Idh1	isocitrate dehydrogenase 1 (NADP+), soluble	chr9:70668352-70689596	53.4626	66.1959	58.0493	0.308212	0.118749	0.189463	0.219771	0.739413	0.549907	53.8753	50.8245	52.7656	57.1978	52.6498	52.7219	94.0931	60.4543	70.4458	53.2644	63.5574	53.7327	57.33	57.5772
Grina	glutamate receptor, ionotropic, N-methyl D-aspartate-associated protein 1 (glutamate binding)	chr7:117290444-117293619	48.951	66.0457	48.1536	0.432125	-0.0236962	0.455822	0.0596881	0.956671	0.0596881	52.6394	49.8064	54.136	49.7361	38.4372	65.8094	81.8765	61.7465	60.3958	60.4002	52.9395	46.1268	53.355	40.193
Picalm	phosphatidylinositol binding clathrin assembly protein	chr1:160681964-160761651	46.1253	65.9766	61.2001	0.516397	0.407976	0.10842	0.0117172	0.100296	0.767011	52.3812	46.3069	48.7176	48.2011	35.0195	52.11	76.1762	68.5808	64.811	68.2049	54.0541	66.679	68.2275	55.8396
Jun	jun proto-oncogene	chr5:117957729-117960823	216.132	65.8696	156.316	-1.71423	-0.467449	-1.24678	0.000653095	0.120404	0.000653095	300.255	255.657	208.47	168.156	148.124	66.6478	57.5051	75.52	67.4599	62.215	115.765	198.245	223.603	87.651
Emc10	ER membrane protein complex subunit 10	chr1:101560505-101566824	76.6475	65.8379	69.8407	-0.219319	-0.13417	-0.0851488	0.43601	0.706042	0.827597	81.0698	80.9358	86.8278	75.1583	59.2457	82.8672	65.1961	76.8221	41.6982	62.6062	69.5444	73.7155	65.2062	70.8967
Mapk1ip1	mitogen-activated protein kinase 1 interacting protein 1	chr1:218122482-218123904	77.8564	65.8278	53.1129	-0.24212	-0.551753	0.309633	0.374809	0.0220975	0.262936	81.7884	81.259	75.5985	93.3292	57.307	71.9904	85.8778	56.7641	54.6358	59.8707	77.3601	52.4379	38.3864	44.2674
Bcat1	branched chain amino acid transaminase 1, cytosolic	chr4:243444838-243491574	20.4168	65.7572	28.9113	1.68739	0.50188	1.18551	0.000653095	0.0463165	0.000653095	20.841	21.3594	20.0695	21.6607	18.1533	85.5101	69.118	60.3703	35.7422	78.0453	27.4383	44.3378	18.1509	25.7183
Zfp330	zinc finger protein 330	chr19:34916044-34926423	66.5793	65.7136	75.4621	-0.0188815	0.180678	-0.19956	0.963134	0.57756	0.516147	65.6224	67.1956	60.7393	70.0405	69.2985	65.3574	67.3942	63.1465	68.5277	64.1421	81.9335	69.6557	76.0276	74.2314
Tmem150a	transmembrane protein 150A	chr4:164989420-164999568	58.9665	65.6294	54.6264	0.154446	-0.110297	0.264743	0.692822	0.798752	0.449913	63.375	56.7979	60.2377	68.4172	46.0047	80.7221	68.3238	62.88	50.8595	65.3615	54.893	63.3692	53.8275	46.416
Rtn4	reticulon 4	chr14:113792442-113839936	63.6636	65.5945	74.5923	0.0431066	0.228558	-0.185451	0.919121	0.484741	0.594998	65.0067	63.0181	62.3294	56.7911	71.1727	74.9407	57.4569	66.3257	60.6832	68.5662	77.4873	81.0384	62.8864	76.9572
Wipi1	WD repeat domain, phosphoinositide interacting 1	chr10:97578113-97614772	58.715	65.5937	48.9271	0.159829	-0.263094	0.422923	0.601908	0.349679	0.081323	59.4141	57.479	53.9746	60.3475	62.3599	76.1089	74.652	59.638	55.2193	62.3505	50.5908	53.5946	41.5368	49.9864
Ppp1r12b	protein phosphatase 1, regulatory subunit 12B	chr13:56637004-56836014	132.443	65.5086	128.957	-1.01562	-0.0384864	-0.97713	0.000653095	0.946608	0.000653095	125.321	129.053	109.392	160.081	138.37	76.3127	68.01	63.7248	51.036	68.4598	117.671	82.4155	130.831	184.909
Cidec	cell death-inducing DFFA-like effector c	chr4:208674527-208687883	66.9308	65.4934	123.684	-0.0313215	0.88592	-0.917242	0.950703	0.000653095	0.000653095	67.1922	37.6844	63.031	44.0601	122.686	36.5622	21.4867	60.2856	173.646	35.4863	102.29	139.035	184.528	68.8839
LOC294154	similar to chromosome 6 open reading frame 106 isoform a	chr20:9532257-9599034	85.3304	65.4605	83.5457	-0.382436	-0.0304936	-0.351943	0.121047	0.949078	0.194834	88.5213	84.665	86.3552	87.0935	80.0171	62.3988	72.0119	67.7798	64.3781	60.7336	88.4155	77.2096	79.358	89.1999
Prdx2	peroxiredoxin 2	chr19:37060538-37065717	59.043	65.4358	65.4449	0.148314	0.148514	-0.000200393	0.652067	0.674135	0.99929	58.2322	55.5169	70.0688	54.1559	57.2412	85.8836	52.947	59.0731	61.6463	67.6289	71.348	63.5487	74.1266	52.7562
Fbn1	fibrillin 1	chr3:124095125-124289500	68.2975	65.4187	58.1009	-0.0621291	-0.233271	0.171142	0.891973	0.507641	0.660923	71.8563	68.7433	69.7171	59.9583	71.2123	61.5908	50.8283	81.973	53.1806	79.5207	48.159	49.2803	61.7345	73.2297
Sgk1	serum/glucocorticoid regulated kinase 1	chr1:25652750-25660866	34.2736	65.3677	34.1602	0.93148	-0.00478148	0.936262	0.000653095	0.992578	0.000653095	38.3541	34.5512	38.5273	32.2782	27.6571	83.8768	56.231	63.9625	45.9265	76.8415	29.8891	47.994	37.1601	21.5975
Tmem30a	transmembrane protein 30A	chr8:86767826-86789807	48.8876	65.3616	59.8206	0.418975	0.291174	0.127801	0.063792	0.281655	0.72082	57.3026	48.9177	47.6085	41.4768	49.1323	57.1088	69.1617	70.2406	62.6791	67.6178	53.513	59.243	70.5494	55.9769
Sdhb	succinate dehydrogenase complex, subunit B, iron sulfur (Ip)	chr5:163197044-163217314	100.648	65.3437	162.329	-0.623206	0.689595	-1.3128	0.00401415	0.00267407	0.000653095	88.0748	82.3215	102.415	89.5458	140.886	48.0399	43.7715	63.0008	108.149	63.7569	176.886	160.689	215.419	96.3223
Nfe2l1	nuclear factor, erythroid 2-like 1	chr10:84475361-84482760	65.986	65.3147	74.6573	-0.0147521	0.178124	-0.192876	0.973481	0.581977	0.532381	65.2895	72.8672	76.6875	57.4677	57.6181	55.9294	81.2899	61.3644	69.6347	58.3551	70.7765	61.9942	93.8502	72.0085
Grn	granulin	chr10:90165633-90171738	54.326	65.3144	47.0851	0.26576	-0.20637	0.47213	0.317626	0.507077	0.0518797	51.6827	54.0957	56.9195	53.9115	55.0204	65.7391	66.2496	77.7923	59.116	57.6751	42.9963	50.1721	49.1328	46.0394
RGD1310352	similar to HTGN29 protein; keratinocytes associated transmembrane protein 2	chr10:37530137-37542768	63.4901	65.2897	65.5756	0.0403246	0.0466284	-0.0063038	0.919635	0.912703	0.989354	72.0151	60.3217	66.2467	55.97	62.897	66.9346	60.8432	72.9597	54.4132	71.2979	66.324	71.1043	59.8572	65.017
Arcn1	archain 1	chr8:47670181-47694935	69.254	65.2636	73.5578	-0.0856182	0.0869797	-0.172598	0.819268	0.82665	0.612933	74.4325	69.104	70.1875	67.803	64.7432	60.4624	63.3541	71.6433	63.5592	67.2992	61.759	67.9886	80.9005	83.5829
Ppp2cb	protein phosphatase 2, catalytic subunit, beta isozyme	chr16:61933983-61955473	78.5156	65.2364	81.9469	-0.267302	0.0617092	-0.329012	0.306996	0.881704	0.210924	80.3744	80.4153	81.6554	81.7121	68.4208	71.2486	65.7317	69.4518	54.0466	65.7032	83.8285	77.5928	87.4865	78.8797
Adss	adenylosuccinate synthase	chr13:100355978-100386314	53.4699	65.2187	61.3046	0.286558	0.197268	0.0892893	0.266038	0.531245	0.819599	56.5514	51.8002	55.1931	49.8391	53.9659	69.2218	61.3157	64.4839	55.6793	75.3928	56.4871	81.4739	54.8658	52.3918
Hdac5	histone deacetylase 5	chr10:89927485-89956387	73.6543	65.1958	76.7419	-0.175991	0.059244	-0.235235	0.575675	0.894526	0.466515	63.0107	76.0201	76.6252	86.1786	66.437	60.8676	85.5799	56.2459	51.876	71.4097	82.381	55.3993	72.3376	96.8497
Dbi	diazepam binding inhibitor (GABA receptor modulator, acyl-CoA binding protein)	chr13:41256373-41264794	107.62	65.1949	185.567	-0.72312	0.78599	-1.50911	0.000653095	0.000653095	0.000653095	101.473	96.8203	115.315	74.7834	149.71	69.3645	30.7203	92.3804	80.5322	52.9771	216.91	200.59	221.247	103.522
Ppp2r2a	protein phosphatase 2, regulatory subunit B, alpha	chr15:47862027-47921336	72.7806	65.184	72.5318	-0.159035	-0.0049401	-0.154095	0.610015	0.992607	0.654022	77.902	80.8846	72.9063	69.6076	62.6024	80.566	63.8381	62.717	65.3683	53.4308	77.8054	77.1767	63.3774	71.7676
Tp53inp2	tumor protein p53 inducible nuclear protein 2	chr3:157278514-157286642	72.7253	65.1611	83.9603	-0.158446	0.20725	-0.365696	0.632216	0.536409	0.195627	78.909	64.4139	63.6319	84.4669	72.2049	70.5648	77.3655	67.4649	45.3207	65.0897	79.7418	88.823	95.553	71.7233
Stk38l	serine/threonine kinase 38 like	chr4:245213200-245245025	30.8097	65.1332	54.4239	1.08001	0.820857	0.259153	0.000653095	0.000653095	0.389827	38.3194	27.6149	33.8168	34.9752	19.3221	75.706	92.8163	48.9504	36.8002	71.393	55.6042	66.9851	38.1433	56.963
Srsf6	serine/arginine-rich splicing factor 6	chr3:165502384-165507707	85.1913	65.0804	72.4852	-0.388483	-0.233018	-0.155465	0.115413	0.460074	0.660923	80.3368	86.8459	84.1765	100.059	74.5385	68.4316	59.5264	64.9497	61.5229	70.9712	82.2092	75.8871	65.3351	66.5096
Vapb	VAMP (vesicle-associated membrane protein)-associated protein B and C	chr3:177890855-177926747	59.9218	65.0544	72.7049	0.118566	0.278971	-0.160406	0.737835	0.340352	0.643657	56.8844	60.3188	55.0723	55.415	71.9185	60.1506	62.9749	69.1985	67.8458	65.1022	64.1132	69.6639	78.6194	78.423
Zbtb16	zinc finger and BTB domain containing 16	chr8:51578464-51739786	38.9468	65.0137	72.16	0.739237	0.889693	-0.150455	0.00173202	0.00601445	0.750474	71.7609	69.9347	17.898	22.9442	12.1965	44.0748	118.364	50.8758	50.8025	60.9518	29.9576	25.6601	32.6682	200.354
Maf1	MAF1 homolog (S. cerevisiae)	chr7:117405316-117408350	70.5887	64.8897	71.9915	-0.121448	0.0283884	-0.149837	0.719821	0.94804	0.665651	68.6994	71.8787	64.9732	64.8478	82.5445	62.9971	84.108	61.9403	60.7052	54.698	72.5479	63.946	70.8301	80.642
Ddx46	DEAD (Asp-Glu-Ala-Asp) box polypeptide 46	chr17:11582991-11626966	63.7983	64.8178	65.5571	0.0228728	0.039235	-0.0163623	0.957934	0.929465	0.972886	52.253	61.4583	57.492	75.7952	71.993	63.2833	71.5741	57.6589	69.3996	62.1732	69.6454	59.1296	61.6958	71.7577
Tsg101	tumor susceptibility 101	chr1:104015968-104044641	52.7695	64.6624	61.5602	0.293222	0.222293	0.0709287	0.24727	0.45614	0.859167	55.7052	50.1849	48.7224	52.7558	56.4792	62.5278	57.18	62.5628	77.7504	63.2907	56.9024	71.167	61.614	56.5573
Oxa1l	oxidase (cytochrome c) assembly 1-like	chr15:36884733-36893489	71.2113	64.646	76.4904	-0.139545	0.103173	-0.242718	0.665122	0.782371	0.418019	54.395	71.5876	77.4259	69.9813	82.6667	53.9234	63.3884	61.6878	78.8296	65.4008	68.6644	68.5006	106.477	62.3201
Ifngr1	interferon gamma receptor 1	chr1:16607954-16626390	45.556	64.4036	44.5895	0.499502	-0.0309362	0.530438	0.0189735	0.943599	0.0189735	46.0801	44.0834	46.076	50.8926	40.6476	65.3091	73.0649	64.8656	62.8944	55.8841	45.7665	54.7502	40.8991	36.9422
Hp1bp3	heterochromatin protein 1, binding protein 3	chr5:160331115-160358541	61.2449	64.3867	66.3363	0.072172	0.115208	-0.043036	0.848694	0.760316	0.921161	59.5635	65.4435	58.5189	55.8413	66.8576	59.9616	73.3245	58.4371	70.7255	59.4848	62.7712	59.5674	67.6088	75.3979
Emc2	ER membrane protein complex subunit 2	chr7:82349424-82385901	65.5997	64.3806	86.5885	-0.0270642	0.400486	-0.42755	0.947973	0.104131	0.0806515	65.3588	76.1219	65.4222	53.38	67.7157	61.5612	63.6037	57.3216	90.925	48.4914	89.8353	103.644	91.3569	61.5175
Dpysl2	dihydropyrimidinase-like 2	chr15:48053078-48120298	74.3294	64.3166	57.4992	-0.20874	-0.37039	0.16165	0.500984	0.170168	0.647634	81.0741	83.9113	74.4583	60.3352	71.868	50.7137	75.0435	68.5	63.6726	63.6533	60.398	56.8043	48.3813	64.4132
Serp1	stress-associated endoplasmic reticulum protein 1	chr2:168135805-168139831	67.0241	64.1897	75.3332	-0.0623387	0.168606	-0.230944	0.871769	0.61495	0.448153	72.0287	62.1902	61.6949	65.2192	73.9875	68.0319	55.3149	73.2496	59.9306	64.4214	75.0275	83.8462	72.9683	69.4906
Dgat2	diacylglycerol O-acyltransferase 2	chr1:170316040-170346306	102.873	64.1394	207.41	-0.681583	1.01162	-1.6932	0.0229153	0.000653095	0.000653095	80.2731	76.3068	91.8408	56.8917	209.053	24.4719	16.3932	61.3988	181.437	36.9958	211.946	196.289	320.962	100.442
Rhoj	ras homolog family member J	chr6:107702936-107785231	79.3496	64.1296	65.8319	-0.307233	-0.269438	-0.0377954	0.2282	0.348173	0.929685	86.0172	78.628	78.8507	80.6251	72.6273	60.2852	87.8479	64.5743	50.8009	57.1397	64.3507	60.397	57.9733	80.6065
Mir143	microRNA 143	chr18:56200185-56200290	171.563	64.1019	127.957	-1.4203	-0.423082	-0.997216	0.000653095	0.223626	0.00715047	198.283	152.099	91.4125	247.75	168.27	66.3948	92.4263	28.0111	67.3837	66.2935	121.573	77.8884	63.5125	248.852
Oxct1	3-oxoacid CoA transferase 1	chr2:72891712-73037617	112.115	64.0862	116.263	-0.806889	0.0524123	-0.859301	0.000653095	0.909251	0.000653095	118.966	91.756	98.1019	105.861	145.888	61.5784	60.2818	74.5098	72.2489	51.8123	119.889	96.5933	136.754	111.815
Rgs4	regulator of G-protein signaling 4	chr13:92682955-92689247	53.5656	64.0027	76.421	0.256825	0.512661	-0.255837	0.374809	0.043336	0.422838	26.4575	57.6478	68.7709	72.553	42.3991	98.1133	44.6368	60.1609	50.4698	66.6326	85.9783	106.869	55.9693	56.8675
Ddb1	damage-specific DNA binding protein 1, 127kDa	chr1:233603489-233629284	62.6809	63.9575	64.7062	0.0290868	0.0458781	-0.0167913	0.94657	0.915955	0.97142	64.4504	60.5777	60.3852	63.1653	64.8258	73.3146	65.838	63.5265	52.3222	64.7861	61.0411	65.5187	65.473	66.792
Cdk16	cyclin-dependent kinase 16	chrX:2500715-2512068	65.8522	63.9371	70.3782	-0.0425774	0.0958966	-0.138474	0.921942	0.820279	0.711467	66.0149	65.517	65.1501	68.9375	63.6415	65.5149	67.5234	67.173	53.1797	66.2946	63.1791	71.6726	77.5277	69.1332
Rnf10	ring finger protein 10	chr12:48897001-48930785	63.264	63.9189	67.265	0.0148569	0.0884719	-0.073615	0.973355	0.822508	0.856146	57.6022	61.3829	72.1595	65.432	59.7435	76.95	62.7782	63.739	53.4312	62.6959	64.2889	64.9593	71.3751	68.4369
Smad7	SMAD family member 7	chr18:70530558-70558927	50.3537	63.9124	34.395	0.343998	-0.549899	0.893897	0.193684	0.0267118	0.000653095	63.0707	55.0936	48.9185	55.8193	28.8664	64.3837	53.2629	91.0343	41.0375	69.8437	26.9986	28.3249	23.567	58.6895
Stx4	syntaxin 4	chr1:206310317-206317403	78.2014	63.8432	76.3395	-0.292662	-0.0347649	-0.257897	0.253181	0.936438	0.377882	73.3399	77.1609	68.489	80.5771	91.4401	61.4043	68.5013	64.7552	53.3636	71.1914	75.9375	76.0632	75.3152	78.0421
Mbd3	methyl-CpG binding domain protein 3	chr7:12349100-12356303	70.8263	63.8267	71.1196	-0.150124	0.00596317	-0.156087	0.632174	0.990114	0.646776	63.6002	58.1759	67.4193	83.682	81.254	64.7999	66.544	64.4597	51.1798	72.1503	79.2228	66.4788	68.4047	70.3723
Chmp1a	charged multivesicular body protein 1A	chr19:66707176-66715457	81.0133	63.6595	66.1085	-0.347784	-0.293323	-0.0544613	0.156891	0.30013	0.896027	68.8464	76.1945	81.9703	88.7712	89.2843	80.351	61.9281	62.8333	56.217	56.9679	88.6671	71.1514	40.7727	63.8428
Las1l	LAS1-like (S. cerevisiae)	chrX:65923643-65944397	83.0856	63.6284	72.3668	-0.384927	-0.19927	-0.185657	0.107699	0.529049	0.565984	69.6082	87.183	71.1662	101.706	85.7648	72.0816	69.188	53.1543	65.1287	58.5893	82.6396	70.9317	58.957	76.9389
C1s	complement component 1, s subcomponent	chr4:224162095-224174100	30.0124	63.5953	30.708	1.08336	0.0330568	1.0503	0.000653095	0.939078	0.000653095	33.3081	34.0257	34.2679	16.1216	32.3388	52.2723	70.5791	73.9489	66.4124	54.7638	27.5855	33.189	25.0486	37.009
Tgoln2	trans-golgi network protein 2	chr4:165245797-165253551	61.2882	63.5808	69.4259	0.0529812	0.179863	-0.126882	0.898514	0.599137	0.739115	62.6828	60.928	65.0681	56.7861	60.9761	54.7303	63.662	70.8647	65.6499	62.9972	68.589	62.8776	69.9631	76.2737
Emc4	ER membrane protein complex subunit 4	chr3:110348099-110450999	54.781	63.5679	59.8361	0.214622	0.12734	0.0872823	0.59449	0.79371	0.870421	56.2136	56.9554	58.9784	47.0635	54.6944	72.6623	65.3118	59.4383	64.4007	56.0264	61.6957	70.2694	61.228	46.1514
Prrx1	paired related homeobox 1	chr13:86039712-86107205	41.5559	63.4216	40.718	0.609921	-0.0293855	0.639307	0.00267407	0.94965	0.00601445	40.4352	45.5152	39.0629	37.1698	45.5963	61.0642	59.6556	77.6615	50.6282	68.0983	38.7453	38.8077	34.1052	51.2139
Arhgap1	Rho GTPase activating protein 1	chr3:87254430-87275981	69.1537	63.4196	61.587	-0.124876	-0.167181	0.0423046	0.719534	0.619562	0.921602	86.2153	68.2453	69.2266	78.4659	43.6152	63.0024	85.7361	63.0419	41.7601	63.5576	58.5943	64.2102	54.6012	68.9421
Pitpnb	phosphatidylinositol transfer protein, beta	chr12:53020765-53083036	64.1182	63.3296	68.6684	-0.0178557	0.0989105	-0.116766	0.968013	0.7942	0.753663	71.5231	63.098	63.9887	71.3384	50.6429	69.3985	72.2405	64.2576	52.7946	57.9567	73.2614	63.9632	64.1997	73.2491
Plp2	proteolipid protein 2 (colonic epithelium-enriched)	chrX:16470479-16484448	42.254	63.3011	45.5454	0.583145	0.10822	0.474925	0.0926329	0.848997	0.22282	51.7602	50.4315	37.7462	41.2838	30.0481	86.2328	76.1024	60.2797	31.7226	62.168	43.2397	54.5038	44.4033	40.0349
Hmgn3	high mobility group nucleosomal binding domain 3	chr8:90151446-90187798	38.4001	63.2633	35.2697	0.720257	-0.122681	0.842938	0.00173202	0.767065	0.000653095	37.4829	46.6925	32.6498	35.2775	39.8979	71.0256	64.6023	64.4154	54.9961	61.277	33.6002	43.9358	32.2705	31.2724
Copz1	coatomer protein complex, subunit zeta 1	chr7:142680778-142706986	88.6339	63.193	74.1219	-0.488094	-0.257959	-0.230135	0.0226298	0.372185	0.449913	98.0867	85.3866	85.3922	95.7726	78.5314	84.9996	51.1588	66.2653	48.8916	64.6496	76.1305	76.4273	72.3429	71.5869
Adcy5	adenylate cyclase 5	chr11:71787103-71933840	84.5555	63.0925	85.1855	-0.422431	0.0107084	-0.433139	0.102298	0.982802	0.119206	98.6585	79.0932	71.2452	109.546	64.2349	57.5722	83.9579	64.9549	41.6326	67.3449	70.4447	68.0449	87.237	115.015
Eif3g	eukaryotic translation initiation factor 3, subunit G	chr8:21967946-21971979	61.0405	63.092	67.1529	0.0476891	0.137682	-0.0899934	0.903905	0.692544	0.816727	60.6838	58.322	60.5051	58.5354	67.1563	60.9779	63.7252	52.4371	77.9732	60.3465	60.9608	69.3814	69.8281	68.4413
Tmem47	transmembrane protein 47	chrX:48984316-49010851	79.8743	63.0043	77.0787	-0.342282	-0.0513999	-0.290882	0.191167	0.909266	0.332829	90.8265	74.2296	73.0912	77.9334	83.2908	66.8982	68.3406	61.8775	49.4506	68.4543	75.1803	57.7756	82.4706	92.8881
Vamp3	vesicle-associated membrane protein 3	chr5:171703251-171713723	77.7808	62.9693	62.6765	-0.304765	-0.31149	0.00672516	0.226401	0.249197	0.988275	87.8738	75.3556	74.1402	81.4755	70.0588	73.0349	58.8648	72.2329	53.9241	56.7899	60.0091	75.7486	61.785	53.1632
Praf2	PRA1 domain family, member 2	chrX:16399545-16402441	50.6151	62.9636	40.8936	0.31495	-0.307691	0.622641	0.211004	0.266818	0.0063956	58.1452	46.3231	50.4053	57.3967	40.805	77.6174	59.5182	67.4379	39.5509	70.6933	41.9323	43.4106	34.8933	43.3383
Dek	DEK oncogene	chr17:19948511-19970468	68.8427	62.9024	69.9832	-0.130188	0.0237067	-0.153895	0.698187	0.958084	0.657084	68.755	69.9147	62.5977	64.4182	78.5277	64.2431	68.5821	61.8262	67.9517	51.9088	64.1187	63.6911	66.3679	85.7553
Atp5d	ATP synthase, H+ transporting, mitochondrial F1 complex, delta subunit	chr7:12596915-12600002	93.8775	62.8709	104.427	-0.578386	0.153649	-0.732035	0.00601445	0.657702	0.000653095	86.7075	88.1821	81.6877	115.332	97.4778	75.3125	50.1028	58.4878	68.798	61.6535	110.896	98.1417	133.852	74.8198
Hand2	heart and neural crest derivatives expressed 2	chr16:36107397-36174764	47.6233	62.6533	37.1107	0.395722	-0.359834	0.755556	0.191167	0.316329	0.00822323	56.5127	42.909	53.1685	53.9891	31.5374	83.4392	68.3766	46.6851	25.7846	88.9811	35.0271	47.6867	34.5647	31.1642
Dusp3	dual specificity phosphatase 3	chr10:89697003-89708826	89.4009	62.6311	87.6127	-0.513411	-0.0291504	-0.484261	0.0261852	0.950703	0.0600638	82.3801	86.5199	88.9278	104.21	84.9671	68.0764	70.8189	61.3273	49.8459	63.0869	94.5939	81.8658	80.7938	93.1972
Nap1l4	nucleosome assembly protein 1-like 4	chr1:223575625-223611023	64.3393	62.6257	77.927	-0.0389457	0.276422	-0.315367	0.923437	0.337883	0.246624	60.9585	63.3728	53.2066	64.2065	79.9521	65.2156	58.8847	59.8095	69.7377	59.4811	79.2849	73.6534	79.868	78.9015
Sh3gl1	SH3-domain GRB2-like 1	chr9:10018273-10040574	72.3244	62.5819	62.8688	-0.208735	-0.202137	-0.00659846	0.468368	0.51981	0.988275	64.5948	71.262	69.7621	94.3704	61.6326	73.5677	72.9681	52.746	47.4687	66.1593	71.3255	62.2142	50.2653	67.6703
Tmx4	thioredoxin-related transmembrane protein 4	chr3:134016676-134057338	67.636	62.5654	98.8705	-0.112427	0.547747	-0.660174	0.765089	0.0322004	0.00563845	50.3269	75.5342	89.5842	71.5255	51.2093	59.6706	76.2167	47.9961	55.3874	73.5564	96.6302	88.0513	103.787	107.013
P4ha1	prolyl 4-hydroxylase, alpha polypeptide I	chr20:30726603-30776294	86.4407	62.4347	100.682	-0.469363	0.220026	-0.689389	0.0373401	0.483698	0.00357487	77.6084	82.453	110.315	89.3036	72.5232	57.2068	46.4744	83.5846	46.7217	78.1859	105.224	74.5519	109.012	113.94
Adck3	aarF domain containing kinase 3	chr13:103459495-103486271	39.1287	62.4133	109.102	0.673626	1.47937	-0.805746	0.0608742	0.000653095	0.0282974	25.9489	30.3084	33.9217	22.4882	82.9763	20.1879	21.9234	28.2173	214.75	26.9874	127.562	90.2257	166.15	52.4688
LOC100360880	NA	chr1:81481173-81487900	159.372	62.3976	43.5954	-1.35284	-1.87016	0.517315	0.000653095	0.000653095	0.0510842	155.023	236.183	251.103	83.6795	70.8733	70.4267	17.5378	99.3153	50.0977	74.6102	57.8588	42.0256	59.64	14.8569
RGD1304704	similar to Hypothetical protein CGI-99	chr15:8973821-8984510	71.645	62.3794	70.548	-0.199798	-0.0222616	-0.177536	0.499596	0.961417	0.59351	86.6178	78.0225	61.9419	62.8459	68.7971	61.7708	64.4443	59.7842	64.9011	60.9965	83.4327	72.3502	63.7581	62.651
Eef1d	eukaryotic translation elongation factor 1 delta (guanine nucleotide exchange protein)	chr7:116820230-116829245	70.461	62.2712	65.7093	-0.178261	-0.100726	-0.0775344	0.552027	0.788035	0.844108	65.2817	73.2429	64.9241	75.5972	73.2591	64.729	58.3103	61.8612	62.9074	63.5479	61.2102	69.6105	63.1559	68.8609
Emd	emerin	chr1:152192992-152196003	61.027	62.2453	71.5073	0.0285171	0.228643	-0.200126	0.946557	0.446373	0.51932	65.9084	65.3927	52.9458	70.8793	50.0092	66.7913	57.0381	82.4071	41.0656	63.9246	88.1665	78.4732	54.4981	64.8916
Coq10b	coenzyme Q10 homolog B (S. cerevisiae)	chr9:61337178-61357092	90.6521	62.1937	93.0852	-0.543572	0.0382113	-0.581784	0.0132558	0.931267	0.0110649	97.4762	106.631	102.544	96.6529	49.9569	63.9396	54.2805	64.3932	72.3046	56.0505	88.7757	128.563	108.44	46.5622
Ces1d	carboxylesterase 1D	chr19:26142438-26431927	24.3668	62.1203	56.7588	1.35015	1.21993	0.13022	0.000653095	0.000653095	0.81746	21.3446	9.82711	16.5322	20.0621	54.068	26.5349	24.671	36.3764	200.461	22.5584	57.6829	59.6991	80.3301	29.3232
Hnrnpl	heterogeneous nuclear ribonucleoprotein L	chr1:88176710-88187394	60.7979	62.0831	68.7275	0.0301795	0.176866	-0.146686	0.941667	0.590887	0.672707	56.7133	61.3893	58.3699	59.1348	68.3821	65.5777	54.8856	61.6346	64.0418	64.2758	68.2044	69.2006	73.5488	63.9561
RGD1562987	similar to cDNA sequence BC031181	chr18:70114129-70122605	68.6176	61.9021	63.0656	-0.14859	-0.121724	-0.0268661	0.646205	0.739368	0.953689	81.018	73.3827	63.2286	66.6604	58.7983	76.8706	68.5587	61.7594	43.0524	59.2693	70.5484	67.018	54.4132	60.283
F3	coagulation factor III (thromboplastin, tissue factor)	chr2:243348429-243360439	98.2176	61.8194	59.3034	-0.667923	-0.727866	0.0599435	0.00563845	0.000653095	0.893821	148.332	90.4561	124.523	42.3713	85.4053	38.9942	34.2876	106.961	92.683	36.1707	60.2753	33.4495	74.5587	68.9302
Ccar1	cell division cycle and apoptosis regulator 1	chr20:34157348-34199950	66.0487	61.4953	63.8179	-0.103054	-0.0495694	-0.0534851	0.779279	0.911885	0.904337	76.3538	62.7277	61.206	68.4514	61.5046	70.8538	59.5887	55.3741	66.1001	55.5596	77.5766	61.1371	50.8123	65.7456
Fcgrt	Fc fragment of IgG, receptor, transporter, alpha	chr1:102151856-102161139	66.8055	61.4486	52.1071	-0.120586	-0.358488	0.237902	0.718903	0.161533	0.415527	68.3182	71.9222	72.1421	66.2788	55.3661	60.364	66.2637	65.3591	67.066	48.1903	56.196	56.4875	56.4101	39.3347
Svil	supervillin	chr17:52915518-53030939	111.804	61.3672	100.62	-0.865432	-0.152049	-0.713383	0.000653095	0.729597	0.00601445	124.437	96.9961	104.752	131.273	101.563	60.0658	82.4597	54.9802	52.273	57.0575	110.171	67.2502	99.6151	125.445
Cxcl16	chemokine (C-X-C motif) ligand 16	chr10:56817241-56828333	17.1318	61.3559	28.7464	1.84052	0.746704	1.09382	0.000653095	0.0063956	0.000653095	19.1361	16.5103	19.1179	16.5309	14.364	79.1014	35.2961	70.0687	42.3255	79.9877	22.2145	63.6924	15.627	13.4518
Cab39	calcium binding protein 39	chr9:92563872-92625079	68.9552	61.329	77.5206	-0.169091	0.168919	-0.338011	0.596011	0.631055	0.217644	65.3806	59.4159	75.4265	70.8521	73.7011	56.97	58.5034	53.4015	79.8504	57.9196	76.2308	70.6465	86.1526	77.0524
Tnfrsf1a	tumor necrosis factor receptor superfamily, member 1a	chr4:224881444-224894088	48.2594	61.3224	39.3372	0.345602	-0.294915	0.640517	0.148306	0.283468	0.00313022	55.6685	49.5997	45.3821	52.1171	38.5298	63.3217	64.4308	67.0588	52.5597	59.241	31.4204	50.0409	35.2681	40.6196
Hadha	hydroxyacyl-CoA dehydrogenase/3-ketoacyl-CoA thiolase/enoyl-CoA hydratase (trifunctional protein), alpha subunit	chr6:37400510-37439592	102.651	61.2216	182.059	-0.745635	0.826659	-1.57229	0.00313022	0.00221111	0.000653095	82.3421	76.4467	85.8152	88.147	180.504	45.2986	35.9114	64.1618	105.827	54.9095	171.501	161.316	288.995	106.425
Vcan	versican	chr2:18363889-18463115	45.7641	61.025	36.4357	0.415186	-0.328862	0.744047	0.129615	0.318161	0.00525255	55.4374	47.7365	52.6946	40.2603	32.6915	73.738	47.3302	67.8822	40.0853	76.0895	34.1076	52.699	28.8454	30.0908
Add1	adducin 1 (alpha)	chr14:82054921-82113952	71.5109	60.9487	63.4749	-0.230566	-0.171977	-0.0585892	0.428744	0.619346	0.892906	80.3459	76.1859	71.697	61.2312	68.0944	61.2818	68.5996	61.4568	50.0306	63.3749	63.6937	50.4863	63.0801	76.6394
Epn1	Epsin 1	chr1:76226172-76242237	61.0884	60.8725	59.7974	-0.00510736	-0.0308166	0.0257092	0.991117	0.943225	0.952895	59.5608	53.0413	63.0407	66.4088	63.3904	63.0557	61.3038	60.5177	59.3303	60.1552	55.8072	55.3533	69.768	58.261
Cir1	corepressor interacting with RBPJ, 1	chr3:66478180-66507756	54.2016	60.8695	48.8753	0.167385	-0.149228	0.316613	0.58876	0.670851	0.25132	65.6505	52.6526	55.2115	46.1721	51.3212	62.7766	80.8134	49.164	63.6166	47.977	50.6687	41.5087	37.3404	65.9835
Slc20a1	solute carrier family 20 (phosphate transporter), member 1	chr3:128276542-128289616	32.4931	60.8599	31.7041	0.905358	-0.0354648	0.940823	0.000653095	0.934211	0.000653095	27.1959	37.8937	37.3698	32.9407	27.0655	81.0799	46.9466	62.356	41.2342	72.6826	30.8154	43.1972	28.5026	24.3012
Dag1	dystroglycan 1 (dystrophin-associated glycoprotein 1)	chr8:116334175-116346857	57.9743	60.8404	69.164	0.0696167	0.254609	-0.184992	0.863959	0.422838	0.59775	59.8614	56.5223	58.4923	58.0033	56.9921	53.2383	70.7971	64.0441	51.2244	64.898	60.5771	60.495	80.7542	74.8298
Pigt	phosphatidylinositol glycan anchor biosynthesis, class T	chr3:167125864-167135023	63.0583	60.8047	53.3727	-0.0525042	-0.240584	0.18808	0.894194	0.415105	0.558772	71.4232	60.2595	69.488	61.5751	52.5456	69.5792	53.8272	70.213	49.5064	60.8974	53.3096	50.7814	51.3368	58.063
Sars	seryl-tRNA synthetase	chr2:230689713-230705606	54.4429	60.7741	59.3884	0.158713	0.125436	0.0332764	0.597894	0.724265	0.940481	51.3628	55.9247	53.4387	51.9416	59.5467	64.5414	64.6027	62.0543	56.6503	56.0218	57.3572	65.213	54.0754	60.9078
Caprin1	cell cycle associated protein 1	chr3:100343083-100374879	42.1354	60.7003	55.5115	0.526671	0.397757	0.128915	0.0163392	0.115072	0.726573	44.6517	39.524	38.9712	37.413	50.1168	45.7532	63.7047	66.194	68.7351	59.1142	47.3876	61.3049	64.2273	49.1264
Kif5b	kinesin family member 5B	chr17:51876233-51906466	59.2257	60.6644	71.4312	0.0346273	0.270331	-0.235704	0.933239	0.37771	0.440855	46.7939	50.9997	45.1373	73.0277	80.1699	59.3769	60.2633	60.0029	65.8204	57.8587	59.329	50.9021	79.2565	96.2373
Ndufb11	NADH dehydrogenase (ubiquinone) 1 beta subcomplex, 11	chrX:2580318-2582577	90.8385	60.6382	107.169	-0.583078	0.238513	-0.821591	0.00484629	0.428853	0.000653095	87.0975	85.9395	79.7033	98.6726	102.779	58.7761	48.581	55.0433	77.407	63.3833	123.822	99.1615	135.279	70.4135
Chmp4bl1	chromatin modifying protein 4B-like 1	chr4:66867506-66868544	63.9962	60.4561	68.6461	-0.0820972	0.101192	-0.183289	0.820432	0.785764	0.569272	62.2474	59.1294	70.739	64.9897	62.8753	57.6182	66.6151	58.5588	52.1707	67.3178	63.6596	64.8849	74.7166	71.3232
Ppp1r11	protein phosphatase 1, regulatory (inhibitor) subunit 11	chr20:4131644-4140578	72.5915	60.4556	66.5854	-0.263924	-0.124594	-0.13933	0.324864	0.732341	0.694607	77.325	74.3792	77.3079	76.3168	57.6286	71.6222	56.9636	64.6159	46.5005	62.576	69.4921	65.3387	56.4823	75.0286
Snrnp35	small nuclear ribonucleoprotein 35 (U11/U12)	chr12:39401199-39408510	75.4251	60.3721	64.5046	-0.321164	-0.225643	-0.0955204	0.196506	0.465058	0.804697	69.591	64.9443	64.0464	93.0326	85.5112	70.1413	57.2456	58.0512	63.5535	52.8688	88.0219	45.9819	46.5479	77.4666
Ikbip	IKBKB interacting protein	chr7:31873365-31884637	60.1567	60.3325	71.4438	0.00420882	0.248084	-0.243875	0.994013	0.399732	0.40866	63.026	59.1681	66.7262	56.5875	55.2757	48.0722	56.9427	67.864	54.8134	73.97	56.5513	57.8834	81.0103	90.3303
Fkbp4	FK506 binding protein 4	chr4:226954533-226962988	134.616	60.2693	156.758	-1.15936	0.219691	-1.37905	0.000653095	0.525331	0.000653095	92.6105	131.532	173.411	138.395	137.134	59.0681	40.7918	77.3053	44.382	79.7995	177.628	113.294	175.804	160.309
Fam198b	family with sequence similarity 198, member B	chr2:198087636-198158773	71.4927	60.0612	66.8469	-0.251361	-0.0969337	-0.154427	0.384528	0.805264	0.665651	78.6693	73.2502	86.334	70.1086	49.1012	73.3633	47.632	71.1652	39.4815	68.6643	66.3907	64.0362	65.9612	70.9998
Sucla2	succinate-CoA ligase, ADP-forming, beta subunit	chr15:59183905-59238472	98.984	60.0602	197.884	-0.720786	0.999387	-1.72017	0.00313022	0.000653095	0.000653095	88.7972	68.9396	89.6117	65.905	181.666	33.2925	28.3867	61.4888	129.955	47.1777	218.204	173.683	294.528	105.12
Ubl5	ubiquitin-like 5	chr8:21719385-21721099	54.6869	60.0492	60.1943	0.134948	0.138431	-0.003483	0.726878	0.738997	0.995417	55.821	57.4887	37.3152	45.71	77.0998	64.191	48.0347	60.7007	60.244	67.0755	76.2247	45.7177	70.9505	47.8843
Golga2	golgin A2	chr3:16666197-16686439	72.8171	59.9216	62.0092	-0.281203	-0.231797	-0.0494065	0.296092	0.467943	0.911958	65.5745	74.3447	72.2644	80.9524	70.9497	61.0966	59.861	60.6798	55.3366	62.6337	71.5344	58.5512	55.0458	62.9053
Pawr	PRKC, apoptosis, WT1, regulator	chr7:51286667-51365775	59.1463	59.9112	64.3182	0.0185376	0.120941	-0.102403	0.966075	0.739768	0.784136	48.9259	53.7962	64.9578	60.3044	67.747	57.3039	64.3004	66.9676	46.492	64.4919	57.7474	64.8871	68.4988	66.1396
Cspg4	chondroitin sulfate proteoglycan 4	chr8:60101159-60136205	70.046	59.8504	68.2579	-0.226941	-0.0373062	-0.189635	0.48958	0.938763	0.613634	82.2182	62.3032	65.0622	80.245	60.4013	74.1833	60.0765	59.0312	35.3593	70.6019	68.842	64.0878	53.1477	86.9541
Zfp385d	zinc finger protein 385D	chr15:10266310-10653490	44.068	59.7354	38.8938	0.438857	-0.18019	0.619046	0.0720534	0.582604	0.0113953	44.689	55.4094	47.0234	36.8484	36.3695	47.7946	107.675	50.1024	32.1533	60.9515	42.1972	36.3233	39.8606	37.1942
Idh2	isocitrate dehydrogenase 2 (NADP+), mitochondrial	chr1:142830040-142849360	109.637	59.6944	128.94	-0.877072	0.233955	-1.11103	0.000653095	0.449773	0.000653095	104.616	95.0115	100.521	114.252	133.787	54.6755	54.4477	52.608	83.869	52.8718	123.127	102.779	178.261	111.591
RGD1309676	NA	chr16:17376840-17396622	20.5811	59.6254	62.7582	1.53461	1.60848	-0.0738753	0.000653095	0.000653095	0.86096	19.7341	21.3557	16.0306	11.6594	34.1257	36.5131	93.7047	40.0251	79.6306	48.2536	73.6786	69.6337	77.6903	30.0301
Snrpf	small nuclear ribonucleoprotein polypeptide F	chr7:34543252-34549956	77.0396	59.6156	74.7548	-0.369911	-0.0434336	-0.326477	0.133728	0.92109	0.247331	88.7887	79.3004	78.5727	72.7061	65.8298	65.2588	69.5375	51.964	48.8802	62.4373	98.1734	76.496	54.4025	69.9472
Smarcd3	SWI/SNF related, matrix associated, actin dependent regulator of chromatin, subfamily d, member 3	chr4:7089269-7120846	103.576	59.5916	75.3332	-0.797515	-0.459338	-0.338177	0.000653095	0.0593233	0.19922	108.074	93.7189	100.627	135.118	80.3438	72.3316	69.3266	55.8325	36.4949	63.9722	77.3771	70.983	73.0356	79.937
Hsd17b11	hydroxysteroid (17-beta) dehydrogenase 11	chr14:7064339-7095462	48.0488	59.5849	42.859	0.310448	-0.164901	0.475349	0.207833	0.617262	0.0455258	52.4374	52.6161	51.1509	38.1478	45.8917	54.7502	75.5491	55.1148	60.1408	52.3698	38.604	43.4325	45.2176	44.182
Polr2e	polymerase (RNA) II (DNA directed) polypeptide E	chr7:12702977-12706900	84.6814	59.4787	82.108	-0.509673	-0.0445235	-0.46515	0.0180884	0.914278	0.0537504	72.3228	77.852	86.0477	98.2066	88.978	52.5623	68.3908	51.345	62.2471	62.8483	92.3003	71.1387	91.0816	73.9113
Rps18	ribosomal protein S18	chr20:7500486-7504165	78.3451	59.4345	62.2522	-0.398542	-0.331717	-0.0668252	0.126964	0.257865	0.881257	83.8447	73.1432	106.842	55.5161	72.3787	46.8692	84.1198	53.6708	54.3757	58.1371	71.9379	53.5503	59.9454	63.5753
Tbl1x	transducin (beta)-like 1 X-linked	chrX:45257892-45286546	62.4603	59.391	65.2432	-0.0726965	0.0628876	-0.135584	0.853511	0.889085	0.725687	56.4697	59.8677	69.3425	64.7671	61.8546	58.3099	65.8005	61.2333	48.9991	62.6119	63.2768	47.3363	64.5944	85.7653
Cyb5a	cytochrome b5 type A (microsomal)	chr18:80739214-80770883	60.9568	59.3609	71.5331	-0.0382755	0.230823	-0.269098	0.929782	0.453134	0.371071	61.1202	61.3594	65.502	44.6869	72.1155	46.6086	56.8297	58.7349	81.0864	53.5447	71.0305	61.7596	75.7668	77.5752
Uba1	ubiquitin-like modifier activating enzyme 1	chrX:2516601-2535075	70.2439	59.3562	65.4586	-0.242974	-0.10179	-0.141184	0.387939	0.793209	0.69443	73.4513	70.078	67.3613	78.5388	61.7901	68.5646	57.0989	57.0142	52.0016	62.1016	60.6345	67.6597	68.7098	64.8305
Bag1	BCL2-associated athanogene	chr5:61785750-61798332	52.0237	59.3273	60.2851	0.189529	0.212634	-0.0231049	0.512987	0.488882	0.957934	50.4959	48.5996	47.698	51.5744	61.7503	55.8233	55.3374	56.7145	64.2868	64.4747	62.2875	64.364	62.126	52.363
Fnbp4	formin binding protein 4	chr3:86277503-86317615	52.9143	59.2101	52.6543	0.162185	-0.00710777	0.169293	0.61774	0.988163	0.628979	46.0115	48.8714	58.6981	65.0365	45.9542	47.2112	78.5386	49.1632	67.6322	53.5054	54.37	54.3681	54.6189	47.2602
Fam65a	family with sequence similarity 65, member A	chr19:48435981-48452711	49.7125	59.1553	49.3536	0.2509	-0.0104536	0.261353	0.368102	0.981183	0.38452	50.8454	48.7535	42.9948	56.902	49.0665	57.3921	62.8577	57.6047	50.5048	67.4171	37.9992	51.2526	48.4418	59.7206
Csnk1a1	casein kinase 1, alpha 1	chr18:56116634-56139523	59.1722	59.1327	67.6073	-0.000962591	0.192258	-0.193221	0.998102	0.546788	0.548008	69.5	57.7269	58.3213	49.0405	61.2722	51.3913	63.2992	60.58	62.2164	58.1768	66.8922	67.3802	69.6974	66.4592
Psmb7	proteasome (prosome, macropain) subunit, beta type 7	chr3:28115648-28176245	67.4749	59.0264	76.9007	-0.192989	0.188647	-0.381636	0.510793	0.561672	0.138702	78.661	64.433	53.8177	68.4954	71.9671	65.683	54.4978	58.8367	52.2136	63.9011	77.2525	66.816	84.1098	79.4246
Aida	axin interactor, dorsalization associated	chr13:100906567-100933404	43.2542	59.005	47.3498	0.447995	0.130518	0.317476	0.0446393	0.707481	0.247393	46.512	42.9141	46.5937	39.1847	41.0665	59.0523	64.6259	59.6725	49.7916	61.8824	42.1992	57.4847	41.9649	47.7506
Aimp1	aminoacyl tRNA synthetase complex-interacting multifunctional protein 1	chr2:256268300-256291846	58.9492	58.8995	62.737	-0.00121628	0.0898451	-0.0910614	0.998102	0.816396	0.813832	58.6336	57.6923	50.1336	59.4581	68.8282	59.5851	57.2179	52.759	69.0008	55.9347	65.6052	58.4783	67.0846	59.7799
Mtus1	microtubule associated tumor suppressor 1	chr16:54044838-54098281	51.1144	58.885	58.5685	0.204171	0.196395	0.00777525	0.489258	0.552498	0.986826	58.2433	50.4222	48.9056	54.7458	43.2551	51.5483	72.8117	53.1861	63.5725	53.3064	52.375	45.454	53.2108	83.2342
Trim47	tripartite motif-containing 47	chr10:103626182-103630654	74.2642	58.8071	54.1082	-0.336675	-0.456818	0.120143	0.197843	0.070977	0.750971	88.8418	66.1051	61.1357	104.711	50.5268	85.4697	57.9504	45.793	34.542	70.2805	64.5673	57.1249	38.5435	56.197
Mrpl34	mitochondrial ribosomal protein L34	chr16:19735399-19736135	72.2499	58.6653	75.3504	-0.300487	0.0606192	-0.361106	0.280094	0.887773	0.199771	60.2451	75.5488	63.765	70.9157	90.7748	77.6174	50.8991	68.5585	47.5746	48.677	78.1088	83.263	70.8162	69.2134
Calm2	calmodulin 2	chr6:21052944-21068133	60.6201	58.6188	58.5346	-0.0484317	-0.0505057	0.00207393	0.906526	0.905874	0.996623	65.2061	62.4987	61.7355	58.093	55.5672	69.0356	54.2236	62.1659	51.7309	55.9381	59.7125	57.509	56.4208	60.4963
Nedd9	neural precursor cell expressed, developmentally down-regulated 9	chr17:25084200-25143750	77.7134	58.6111	67.2073	-0.40699	-0.209545	-0.197445	0.115242	0.571414	0.595918	96.106	51.7369	67.7592	81.624	91.3408	49.4543	33.1265	81.8111	63.0499	65.6137	70.7937	42.273	33.9121	121.851
Sfrp2	secreted frizzled-related protein 2	chr2:202136232-202143778	76.41	58.5517	42.5308	-0.384049	-0.845253	0.461205	0.147961	0.000653095	0.0826826	90.6025	63.0407	123.802	34.5681	70.0363	49.3679	22.7034	105.295	76.256	39.1361	47.4769	20.4402	40.7283	61.4778
Arhgef25	Rho guanine nucleotide exchange factor (GEF) 25	chr7:70646951-70653981	91.2122	58.515	67.5131	-0.64042	-0.434059	-0.206361	0.00221111	0.081323	0.507587	92.9374	92.5301	73.1843	123.581	73.8285	76.5213	60.7028	51.6974	43.1136	60.5399	67.42	66.2764	64.8871	71.4691
Ltbp4	latent transforming growth factor beta binding protein 4	chr1:85328914-85361198	179.001	58.4857	118.602	-1.61381	-0.593834	-1.01998	0.000653095	0.0452815	0.000653095	195.594	199.533	161.461	190.745	147.671	57.062	74.2551	59.7573	44.3518	57.0023	105.711	74.4421	117.917	176.34
Tyrobp	Tyro protein tyrosine kinase binding protein	chr1:90031122-90034973	18.1903	58.4758	16.1456	1.68467	-0.172023	1.8567	0.000653095	0.753819	0.000653095	19.8283	11.3328	25.5955	14.2771	19.9176	70.5882	41.5918	84.0332	49.7603	46.4054	17.8784	23.8247	14.5844	8.29507
Smoc2	SPARC related modular calcium binding 2	chr1:57434173-57565316	8.42771	58.4636	12.6325	2.79433	0.583933	2.21039	0.000653095	0.0383095	0.000653095	7.73104	11.0467	8.3758	8.02251	6.96251	77.7982	66.9688	62.1312	25.9697	59.45	9.34087	24.2949	6.60361	10.2908
Bloc1s1	biogenesis of lysosomal organelles complex-1, subunit 1	chr7:3312813-3316422	61.391	58.4367	63.7299	-0.0711526	0.0539441	-0.125097	0.861762	0.906807	0.745233	60.9184	58.8574	48.1667	65.9757	73.0367	75.6602	53.8662	50.6891	50.8996	61.0684	69.8825	64.9627	68.0584	52.0162
Dbndd2	dysbindin (dystrobrevin binding protein 1) domain containing 2	chr3:167115994-167118754	54.4834	58.413	54.1779	0.100474	-0.00811033	0.108584	0.776805	0.985873	0.770038	62.9105	51.9217	47.4143	60.6063	49.5639	60.5227	70.5207	57.835	37.4057	65.7809	47.7373	55.3815	51.3508	62.2422
Psmb1	proteasome (prosome, macropain) subunit, beta type 1	chr1:58399237-58418261	66.711	58.4017	64.6842	-0.191913	-0.0445116	-0.147402	0.529843	0.919031	0.680976	78.6208	66.6265	62.4671	68.9785	56.8621	60.1581	58.2002	65.4409	50.5767	57.6326	68.135	62.0159	66.1534	62.4324
Anp32a	acidic (leucine-rich) nuclear phosphoprotein 32 family, member A	chr3:69363099-69784930	73.4217	58.393	87.7954	-0.330411	0.257939	-0.58835	0.212949	0.402725	0.010049	48.7085	70.5114	50.0207	62.4298	135.438	57.0041	38.9654	61.0533	74.9218	60.0207	105.214	70.009	79.4167	96.5422
Smim11	small integral membrane protein 11	chr11:36054443-36064297	75.7503	58.3249	62.8247	-0.377141	-0.269921	-0.107221	0.158116	0.399239	0.800572	60.4262	76.5604	58.667	84.8245	98.2737	67.6483	51.8625	68.7646	53.989	49.3599	65.4587	69.4136	56.9223	59.5041
Nckap1	NCK-associated protein 1	chr3:74284276-74361208	38.2763	58.298	48.501	0.606994	0.341562	0.265432	0.00525255	0.207833	0.373644	46.0786	38.9816	35.2862	34.9861	36.049	53.5999	74.6717	54.3206	47.1153	61.7824	41.9087	58.1353	44.2922	49.6677
Prkcd	protein kinase C, delta	chr16:6588989-6608725	47.9441	58.2257	41.3568	0.280304	-0.213229	0.493533	0.295692	0.48958	0.0419567	31.7593	49.2417	50.1324	56.7119	51.8749	71.8833	56.6712	56.2477	38.9475	67.3788	40.057	47.2133	37.0949	41.0618
Slc3a2	solute carrier family 3 (amino acid transporter heavy chain), member 2	chr1:231843821-231858285	42.6491	58.2001	45.9293	0.448507	0.106899	0.341607	0.0477139	0.773383	0.20354	44.8418	45.2133	45.5065	41.4374	36.2465	55.1204	61.2162	58.8637	64.8713	50.929	41.974	50.3669	55.4418	35.9345
Snd1	staphylococcal nuclease and tudor domain containing 1	chr4:55519827-55919018	71.6273	58.1885	58.5236	-0.299776	-0.291492	-0.00828415	0.26285	0.316626	0.984828	71.6047	68.1854	72.7735	73.1229	72.4501	58.8304	56.862	66.0413	49.9043	59.3044	55.1904	57.0483	58.7227	63.1329
Csnk1g2	casein kinase 1, gamma 2	chr7:12112482-12130793	63.7209	58.1865	55.8859	-0.131081	-0.189283	0.0582012	0.695462	0.558926	0.888899	48.9499	65.5105	60.3939	80.4645	63.2857	60.937	61.2791	63.4117	47.9354	57.3695	58.9564	50.271	55.9356	58.3805
Cacybp	calcyclin binding protein	chr13:82855944-82866235	80.7477	58.1358	112.458	-0.473994	0.4779	-0.951894	0.0437631	0.0548118	0.000653095	60.3374	98.0761	123.209	63.4008	58.7152	50.3519	45.4015	64.5867	53.8714	76.4674	118.082	99.816	127.956	103.979
Eif4e2	eukaryotic translation initiation factor 4E family member 2	chr9:94034065-94048590	45.1406	58.0732	55.3862	0.363446	0.295099	0.068347	0.144282	0.310345	0.871543	43.4226	42.9311	48.3786	40.4465	50.5245	62.5093	50.5456	68.8511	48.0062	60.4537	47.6878	54.7999	67.9729	51.084
Degs1	delta(4)-desaturase, sphingolipid 1	chr13:105599914-105606572	60.5357	58.0709	63.392	-0.0599695	0.0665139	-0.126483	0.873395	0.86506	0.72068	74.3881	63.5871	66.7476	51.8177	46.1379	61.2382	65.8007	55.2235	47.026	61.0663	58.4841	66.2398	58.9142	69.9296
Pik3r1	phosphoinositide-3-kinase, regulatory subunit 1 (alpha)	chr2:50895263-50965217	48.1836	58.0708	54.2236	0.26927	0.170379	0.0988911	0.30644	0.606306	0.795395	49.0166	45.4959	51.6323	41.5571	53.2163	42.0059	53.5435	70.0169	66.8118	57.976	44.7084	45.7851	45.7647	80.6364
Sec63	SEC63 homolog (S. cerevisiae)	chr20:49156192-49225366	48.8478	58.0121	54.4484	0.24806	0.156596	0.0914641	0.393867	0.669848	0.824594	47.4526	46.37	48.1145	50.7556	51.5463	49.8207	65.6101	57.1544	58.3062	59.169	49.8245	48.1486	55.178	64.6424
Wsb1	WD repeat and SOCS box-containing 1	chr10:65046090-65062168	87.7426	58.0099	71.9869	-0.596978	-0.285544	-0.311434	0.00822323	0.335754	0.276061	52.9109	108.928	124.482	83.6273	68.7646	71.1245	62.9281	56.1559	42.5391	57.302	92.6341	80.4724	54.9006	59.9404
Fxyd7	FXYD domain-containing ion transport regulator 7	chr1:90630082-90639081	94.0863	57.9776	63.5843	-0.69849	-0.565313	-0.133177	0.000653095	0.0204199	0.726878	86.4722	102.189	83.3467	143.883	54.5412	78.6254	66.2615	41.6504	37.7318	65.6186	75.7204	61.3135	60.1916	57.1118
Plscr2	phospholipid scramblase 2	chr8:99133966-99210708	62.0883	57.9246	59.9576	-0.100144	-0.0503784	-0.0497657	0.778652	0.908149	0.905859	50.3098	88.2159	74.661	60.8685	36.3863	69.6811	59.5071	52.672	45.1002	62.6627	75.2473	62.3678	49.5025	52.7128
Rbm17	RNA binding motif protein 17	chr17:72289004-72305898	69.6697	57.8242	74.2343	-0.268856	0.0915543	-0.360411	0.309105	0.810782	0.155565	66.4828	72.138	67.5274	75.8897	66.3104	46.3451	58.2201	60.9534	69.8126	53.79	81.5762	71.4686	74.195	69.6972
Slc50a1	solute carrier family 50 (sugar efflux transporter), member 1	chr2:207998462-208000843	76.2949	57.8213	56.2695	-0.399984	-0.439233	0.0392483	0.0824475	0.0731028	0.928477	82.1501	82.882	77.837	75.4594	63.1459	79.5903	52.7083	50.4013	56.5915	49.8153	65.0028	57.4418	46.6952	55.9382
Sort1	sortilin 1	chr2:230547670-230626278	63.7696	57.785	65.4723	-0.142173	0.0380159	-0.180189	0.693829	0.935441	0.618652	66.802	61.5055	68.006	64.9174	57.617	57.7527	64.1303	57.4945	49.2797	60.2678	66.1662	57.8872	64.2773	73.5583
Ypel5	yippee-like 5 (Drosophila)	chr6:33919767-33935175	52.3028	57.7776	54.7184	0.143622	0.0651383	0.078484	0.651699	0.870457	0.83871	49.7518	56.8815	52.4411	51.0989	51.3405	58.1446	65.4176	56.424	57.991	50.9106	60.9169	58.257	52.6934	47.0062
Sumo3	small ubiquitin-like modifier 3	chr20:13892795-13903349	45.2136	57.7436	53.8939	0.352903	0.253364	0.099539	0.138485	0.387369	0.786452	46.9005	44.7064	43.7399	46.3673	44.354	56.8268	59.276	58.7357	51.5982	62.2812	55.2762	54.577	53.9953	51.727
Isy1	ISY1 splicing factor homolog (S. cerevisiae)	chr4:184972993-184993684	59.6432	57.6703	61.963	-0.0485295	0.0550479	-0.103577	0.903978	0.891337	0.778519	52.8739	61.1478	56.7468	58.9867	68.461	56.2774	64.2066	61.1638	54.4253	52.2785	63.6738	67.2855	58.5775	58.3151
Akt1s1	AKT1 substrate 1 (proline-rich)	chr1:101910232-101916583	62.7201	57.6456	53.8976	-0.121718	-0.218707	0.0969892	0.717419	0.470112	0.793953	56.4988	62.5497	58.5485	72.1845	63.8191	69.3481	69.5242	46.272	48.422	54.6617	60.0431	54.1286	50.1168	51.302
Itga7	integrin, alpha 7	chr7:3325442-3356994	59.0709	57.4831	64.2411	-0.0393101	0.121049	-0.160359	0.924426	0.751375	0.651507	53.4935	55.9991	53.6391	81.4529	50.7699	69.6693	65.247	54.7458	38.5955	59.1579	61.0632	65.0168	59.781	71.1035
Slc29a1	solute carrier family 29 (equilibrative nucleoside transporter), member 1	chr9:16673066-16687770	41.2865	57.4779	34.9293	0.47734	-0.241232	0.718572	0.0308826	0.410235	0.000653095	41.3924	49.5763	39.0101	37.0898	39.3636	65.1992	48.7302	52.973	33.5657	86.9216	30.6958	37.2856	35.2514	36.4843
Abcf1	ATP-binding cassette, subfamily F (GCN20), member 1	chr20:5407474-5420356	61.6752	57.4581	69.6291	-0.102181	0.174999	-0.27718	0.776458	0.605006	0.344182	50.7327	56.9169	52.3064	69.5875	78.8326	56.8415	54.6651	54.008	66.4475	55.3284	71.1552	58.3451	75.0086	74.0074
Rere	arginine-glutamic acid dipeptide (RE) repeats	chr5:170960572-171292513	56.9769	57.399	51.311	0.01065	-0.151108	0.161758	0.982094	0.686786	0.663368	57.2276	57.6039	50.4021	60.2837	59.3671	48.2523	70.0056	58.8786	57.8158	52.0428	41.2429	48.2644	60.4191	55.3177
Tead3	TEA domain family member 3	chr20:10111922-10131306	104.092	57.3939	82.0409	-0.858886	-0.343441	-0.515445	0.000653095	0.208798	0.0322004	94.1972	106.055	100.413	128.98	90.8142	66.4385	73.0609	46.6486	38.4191	62.4026	83.5469	74.1273	74.1849	96.3044
Cbx5	chromobox homolog 5	chr7:142605587-142623004	52.1441	57.3914	51.389	0.13833	-0.0210452	0.159375	0.67365	0.963082	0.639892	59.0029	49.3162	48.735	51.2246	52.442	61.5741	53.2426	63.5592	53.7462	54.835	52.0198	51.7508	47.6132	54.1723
Ndufa11	NADH dehydrogenase (ubiquinone) 1 alpha subcomplex 11	chr9:9331183-9335243	65.9257	57.3651	81.1661	-0.200667	0.300038	-0.500705	0.540239	0.316723	0.0598633	73.9036	52.1907	63.9887	59.6526	79.8927	60.4337	44.4009	57.6698	59.2275	65.0936	81.715	85.8389	101.219	55.8919
Adamtsl4	ADAMTS-like 4	chr2:217293449-217305079	128.531	57.2791	65.7347	-1.16603	-0.967386	-0.198645	0.000653095	0.000653095	0.551756	137.092	130.063	133.772	151.106	90.6214	70.9482	66.6162	51.0864	46.0416	51.7033	73.139	43.2713	63.0255	83.5029
Spint2	serine peptidase inhibitor, Kunitz type, 2	chr1:88379992-88402444	74.8634	57.1657	67.0251	-0.389111	-0.159559	-0.229551	0.0955352	0.634478	0.446342	65.9064	70.3673	87.7044	81.0145	69.3245	68.364	50.1181	63.3877	40.762	63.1968	68.5633	68.7803	65.8439	64.9129
LOC687565	NA	chr12:39967110-39987806	68.3693	57.1501	64.0985	-0.258592	-0.0930571	-0.165535	0.358093	0.818519	0.634981	78.6971	59.7942	63.1289	64.2345	75.9916	61.7586	52.047	55.0052	65.8184	51.1212	79.1253	56.477	51.355	69.4367
Ccdc25	coiled-coil domain containing 25	chr15:49038970-49070547	71.3848	57.1355	74.607	-0.321229	0.0636937	-0.384922	0.196211	0.875888	0.138874	74.2041	75.1079	72.3344	75.714	59.5635	74.6507	57.9282	50.1707	49.3333	53.5947	98.6359	67.1215	62.4687	70.2018
Nfic	nuclear factor I/C	chr7:11319222-11344818	72.2728	57.1281	75.7162	-0.339252	0.0671496	-0.406401	0.169189	0.87104	0.118428	76.6087	71.6331	61.0244	70.9965	81.1012	40.5603	48.5755	78.0969	49.2958	69.1121	51.8189	56.5609	80.6476	113.837
Rabl6	RAB, member RAS oncogene family-like 6	chr3:2788189-2814110	69.9885	57.1037	53.763	-0.293534	-0.380506	0.0869715	0.260013	0.155565	0.822769	65.8281	61.8436	66.1952	83.621	72.4546	65.4472	50.9576	51.939	57.9229	59.2517	50.6089	47.3535	54.6637	62.4258
Hax1	HCLS1 associated protein X-1	chr2:208762956-208765360	64.4098	57.0991	60.4265	-0.173811	-0.0920973	-0.0817135	0.599137	0.822791	0.84737	57.4104	60.7065	62.0246	69.0926	72.8146	65.7964	45.7279	58.6015	60.0085	55.3613	55.195	54.4027	69.4294	62.679
Ppp6r1	protein phosphatase 6, regulatory subunit 1	chr1:75750749-75777986	65.7384	57.0974	62.4557	-0.20331	-0.0739032	-0.129407	0.498969	0.858092	0.729559	63.2292	72.7522	60.5558	73.7051	58.4496	67.1656	55.0264	54.629	46.7747	61.8915	66.3062	57.2682	60.3407	65.9075
Zc3h7a	zinc finger CCCH type containing 7 A	chr10:3366354-3405540	52.8905	57.0878	47.2748	0.110175	-0.161936	0.272111	0.752688	0.637767	0.3502	46.3142	55.5208	49.9968	62.7383	49.8823	61.6365	59.4789	54.3429	53.972	56.0088	56.1793	53.9206	36.7491	42.2503
Eif3f	eukaryotic translation initiation factor 3, subunit F	chr1:180523035-180532243	60.3069	57.0307	57.7486	-0.0805839	-0.0625361	-0.0180478	0.823031	0.879192	0.969861	60.1817	64.3479	72.6282	54.6232	49.7533	53.6224	79.4931	48.9709	48.4498	54.6172	54.5902	49.6064	63.9471	62.8507
Tmem256	transmembrane protein 256	chr10:56191140-56192252	59.3931	56.983	54.5187	-0.0597629	-0.123545	0.0637819	0.893211	0.767314	0.892463	59.8267	62.761	61.7613	66.9738	45.6427	80.5054	50.3324	59.9815	55.6883	38.4076	70.4953	56.8359	48.9818	41.7617
Gabbr1	gamma-aminobutyric acid (GABA) B receptor 1	chr20:3996332-4025427	69.813	56.9244	60.4001	-0.294448	-0.208944	-0.0855045	0.276254	0.528309	0.83385	68.9523	70.8295	66.658	80.0836	62.5417	59.3042	62.6908	45.6875	63.7478	53.1918	73.1435	58.617	57.5513	52.2888
Aprt	adenine phosphoribosyl transferase	chr19:66095803-66097772	63.3399	56.8534	54.9985	-0.155867	-0.203721	0.0478538	0.658987	0.558763	0.917545	54.8687	55.9393	79.544	66.5832	59.7643	70.2754	52.8728	59.5815	43.851	57.6863	58.7716	63.789	46.3965	51.037
Bnip2	BCL2/adenovirus E1B interacting protein 2	chr8:76662498-76675895	46.001	56.7709	57.01	0.303486	0.30955	-0.0060642	0.227498	0.247914	0.989283	43.8624	45.0895	38.6722	52.1288	50.2522	50.4089	70.2431	50.9404	53.0233	59.2387	51.8286	60.3727	55.9569	59.882
C1qbp	complement component 1, q subcomponent binding protein	chr10:57359088-57363739	60.9368	56.7598	86.2731	-0.102443	0.501597	-0.604041	0.773068	0.0371004	0.0110649	64.6656	54.973	52.4908	56.3296	76.2251	52.2724	46.4574	57.6698	79.662	47.7375	84.8897	93.7389	107.151	59.3124
Gnb2l1	guanine nucleotide binding protein (G protein), beta polypeptide 2 like 1	chr10:33920258-33939101	65.6124	56.7343	60.24	-0.209745	-0.123246	-0.0864993	0.458213	0.734555	0.816528	68.2885	76.9263	76.2149	56.527	50.1051	61.9118	59.8688	54.0605	54.0202	53.8105	63.6614	64.0638	59.8586	53.3762
Snrnp48	small nuclear ribonucleoprotein 48 (U11/U12)	chr17:29159012-29194311	62.2004	56.6883	54.8731	-0.133872	-0.180825	0.0469531	0.687308	0.582309	0.914471	56.6621	74.9338	51.9808	72.9298	54.4954	60.691	61.7922	51.8593	53.3514	55.7477	61.7864	65.032	38.1585	54.5153
Ucp2	uncoupling protein 2 (mitochondrial, proton carrier)	chr1:171710984-171713693	35.5718	56.667	19.7813	0.671776	-0.846598	1.51837	0.00860774	0.00173202	0.000653095	29.7204	17.5092	94.435	15.6452	20.549	109.681	40.8713	42.5186	63.2036	27.0602	30.278	19.6568	13.0136	16.1766
Fkbp7	FK506 binding protein 7	chr3:70095652-70107822	60.8095	56.6416	47.5878	-0.102434	-0.353705	0.251271	0.776267	0.196273	0.40771	65.6786	61.9803	69.0327	56.3189	51.0369	60.8013	45.1363	66.1865	48.8513	62.2327	50.9813	45.9485	48.3186	45.1026
Agpat6	1-acylglycerol-3-phosphate O-acyltransferase 6	chr16:73249355-73282221	50.4998	56.6206	81.3031	0.165051	0.687034	-0.521982	0.632631	0.00121133	0.065938	51.1167	48.3833	39.9038	52.6733	60.4217	39.8596	39.5477	40.8104	122.799	40.0861	82.4094	90.2686	102.842	49.6926
Snx2	sorting nexin 2	chr18:47347480-47389040	52.3095	56.5726	49.3904	0.113032	-0.0828421	0.195874	0.737342	0.827446	0.533762	54.8313	62.1367	51.3858	40.0631	53.1303	55.5064	58.192	58.1041	65.8263	45.2343	56.9809	53.6366	40.2759	46.6681
Atp6v1d	ATPase, H+ transporting, lysosomal V1 subunit D	chr6:111407084-111421779	52.929	56.5574	58.1443	0.0956578	0.13558	-0.0399222	0.787407	0.698677	0.926141	67.0798	52.9565	45.2121	53.454	45.9423	59.217	54.9562	55.2651	54.6354	58.7132	61.1732	69.0965	59.5073	42.8001
Dnajc21	DnaJ (Hsp40) homolog, subfamily C, member 21	chr2:84235351-84250949	61.9894	56.5436	68.9539	-0.132656	0.153611	-0.286267	0.685599	0.653122	0.301299	67.4868	53.5442	58.3366	63.9571	66.6221	47.8719	57.3451	53.4949	68.0316	55.9746	72.412	72.5121	70.255	60.6364
Ehd1	EH-domain containing 1	chr1:228632628-228655003	54.2276	56.5308	51.3597	0.0600088	-0.0783899	0.138399	0.87928	0.842656	0.703786	53.8329	51.1256	48.5258	55.2161	62.4377	45.6096	84.5241	47.7966	61.5104	43.2133	52.7066	47.453	51.1705	54.1089
Dpp7	dipeptidylpeptidase 7	chr3:2550547-2554800	62.9372	56.51	42.3929	-0.155407	-0.570092	0.414685	0.621849	0.0135771	0.0996831	54.1072	70.3427	70.6503	59.7363	59.8495	75.5357	39.3693	74.5592	41.8963	51.1894	50.6468	41.4769	43.3144	34.1334
Rrp1	ribosomal RNA processing 1	chr20:13153170-13164414	65.1788	56.4909	59.1395	-0.206385	-0.14028	-0.0661053	0.465472	0.687705	0.867746	59.7265	60.4958	56.0035	80.0089	69.6593	61.0507	56.444	51.8202	58.8772	54.2623	67.9201	53.4528	51.3018	63.8835
Ppp1r18	protein phosphatase 1, regulatory subunit 18	chr20:5466493-5494142	44.6945	56.4258	45.8735	0.336259	0.0375635	0.298695	0.302563	0.94684	0.408068	45.0064	42.9503	50.3255	50.2558	34.9344	58.272	64.8336	61.3363	40.0125	57.6745	43.3647	51.9093	42.0414	46.1784
Pelp1	proline, glutamate and leucine rich protein 1	chr10:56739141-56756177	72.8201	56.343	59.5618	-0.3701	-0.28995	-0.0801509	0.138093	0.321682	0.843327	67.7087	74.2423	60.7206	95.1937	66.235	74.5337	59.3757	43.5285	51.3692	52.9077	66.6784	56.2604	45.2271	70.0811
Adrm1	adhesion regulating molecule 1	chr3:181565739-181570502	60.4689	56.2687	59.7813	-0.103862	-0.016499	-0.0873632	0.762546	0.970023	0.820432	55.7267	50.1469	58.3953	78.3156	59.7601	61.8373	52.8785	48.6766	52.2369	65.714	51.985	51.4717	71.1617	64.5069
Mgat1	mannosyl (alpha-1,3-)-glycoprotein beta-1,2-N-acetylglucosaminyltransferase	chr10:34296106-34313527	64.3378	56.1979	69.4277	-0.195151	0.109846	-0.304996	0.51107	0.768787	0.26687	47.3726	64.5722	71.4407	64.9417	73.3618	59.2316	52.253	56.4769	44.6775	68.3505	75.2074	62.5435	58.7894	81.1706
Nkd2	naked cuticle homolog 2 (Drosophila)	chr1:33482720-33509560	8.40425	56.1802	16.1879	2.74087	0.945726	1.79514	0.000653095	0.000653095	0.000653095	5.35362	8.95143	8.58909	13.4805	5.64663	79.1661	65.7357	45.3274	26.7189	63.9529	20.8115	21.6442	10.1916	12.1044
Atp8b2	ATPase, aminophospholipid transporter, class I, type 8B, member 2	chr2:208766395-208832721	55.1523	56.1636	55.7312	0.0262138	0.015062	0.0111518	0.951906	0.975155	0.980139	58.6559	58.1401	47.7802	62.2323	48.9532	52.0579	62.0198	55.9582	57.0148	53.7674	48.1248	60.1344	59.7545	54.9109
Tmem43	transmembrane protein 43	chr4:187412089-187427229	71.3485	56.1133	73.1078	-0.346541	0.0351425	-0.381684	0.170061	0.938565	0.152633	74.4324	81.8234	88.5868	62.3916	49.5084	63.3593	56.7952	59.0636	39.2701	62.0781	82.0592	53.7524	61.7699	94.8498
Anapc13	anaphase promoting complex subunit 13	chr8:110462274-110513824	62.4818	56.0698	66.0162	-0.156211	0.0793849	-0.235596	0.780965	0.905905	0.67618	66.4312	57.4437	58.4313	52.2508	77.852	49.4387	45.9506	61.5397	66.4855	56.9347	73.1393	60.9154	75.3811	54.6292
Zfp362	zinc finger protein 362	chr5:150689529-150711442	73.6957	56.026	68.6746	-0.395485	-0.101803	-0.293682	0.089625	0.79185	0.298518	73.3114	75.0553	72.6221	78.6174	68.8722	59.4059	52.6317	60.8635	43.6266	63.6021	66.1502	50.6529	54.626	103.269
Ube2b	ubiquitin-conjugating enzyme E2B	chr10:37213056-37227635	70.782	56.0121	69.7956	-0.337643	-0.0202473	-0.317395	0.159547	0.966236	0.241984	72.6141	77.2403	77.162	64.7903	62.1033	53.2172	63.6644	49.4247	55.8924	57.862	77.3822	74.3647	73.4145	54.0208
Akap2	A kinase (PRKA) anchor protein 2	chr5:79083350-79123671	76.8046	56.0034	91.972	-0.455678	0.260002	-0.71568	0.0514658	0.408975	0.00221111	67.5395	90.7428	76.9202	73.2291	75.5915	46.3443	69.2728	49.8164	57.6807	56.9029	86.5578	58.2486	103.99	119.092
Rnf167	ring finger protein 167	chr10:57013968-57018256	93.0773	55.9753	72.9099	-0.733639	-0.352315	-0.381324	0.000653095	0.184775	0.132159	95.0926	91.7054	91.5475	99.2701	87.7709	62.3032	57.7975	56.0171	51.106	52.6528	82.7154	60.7483	70.7401	77.4358
Plcg1	phospholipase C, gamma 1	chr3:162957125-162987842	63.1693	55.9643	48.6355	-0.174715	-0.377214	0.202499	0.590522	0.163722	0.539359	54.5998	71.3541	57.3217	70.275	62.2958	54.6551	67.3146	52.6654	54.2968	50.8896	54.3002	47.6153	43.1582	49.4681
Maged1	melanoma antigen, family D, 1	chrX:64712955-64719477	66.7948	55.9332	84.7116	-0.256031	0.342823	-0.598855	0.340271	0.200489	0.0113953	73.2435	70.9294	70.2534	64.8738	54.6739	57.4212	44.8117	61.9089	49.8712	65.6529	81.2461	76.547	92.5647	88.4885
Cltc	clathrin, heavy chain (Hc)	chr10:76030219-76085922	62.4148	55.8784	63.419	-0.159596	0.0230273	-0.182624	0.642564	0.962334	0.602674	73.1642	61.8653	60.1772	60.6625	56.2047	59.4301	51.9698	62.1929	50.0401	55.7592	67.1833	64.9202	57.7091	63.8634
Abracl	ABRA C-terminal like	chr1:14859229-14869420	82.0198	55.7944	58.9434	-0.555853	-0.476641	-0.0792112	0.014794	0.0561191	0.84983	79.8277	71.9448	88.3497	93.5068	76.4701	63.2246	56.5754	55.3483	44.2857	59.538	69.6706	57.3889	55.6553	53.0589
Pcolce	procollagen C-endopeptidase enhancer	chr12:24171370-24177687	34.9441	55.5548	26.6605	0.668862	-0.390346	1.05921	0.00267407	0.15099	0.000653095	47.1575	34.7938	39.8361	25.3596	27.5736	55.1577	30.3935	98.6795	44.1983	49.3452	21.1036	25.7831	27.928	31.8273
Thbs4	thrombospondin 4	chr2:41549114-41591101	3.13759	55.5171	4.46079	4.1452	0.507641	3.63756	0.000653095	0.174156	0.000653095	3.78909	4.37488	1.48996	3.0115	3.02254	50.0085	79.8436	46.8735	40.8486	60.0113	2.56437	9.70813	3.60406	1.9666
Trappc3	trafficking protein particle complex 3	chr5:148049386-148062970	54.0573	55.39	53.8746	0.0351354	-0.00488381	0.0400192	0.933301	0.991815	0.925706	45.1633	45.2831	49.7951	70.2431	59.8017	68.6474	51.8671	60.8737	45.9102	49.6514	59.5071	52.6667	54.4838	48.8407
Zrsr1	zinc finger (CCCH type), RNA binding motif and serine/arginine rich 1	chr14:107724469-107835993	55.1323	55.2467	51.7235	0.00299214	-0.0920768	0.095069	0.996094	0.872747	0.869059	50.7474	61.7977	45.1392	58.2623	59.7148	48.4849	66.2664	46.9545	65.4014	49.1264	58.0611	39.6963	34.2056	74.931
Psmd13	proteasome (prosome, macropain) 26S subunit, non-ATPase, 13	chr1:220561662-220574033	56.0051	55.2294	60.1122	-0.020123	0.1021	-0.122223	0.961417	0.782876	0.732533	52.9069	54.2259	45.3588	70.8138	56.7201	58.2026	53.7194	57.2378	50.5404	56.4467	56.3295	69.9514	63.6665	50.5016
Ddx23	DEAD (Asp-Glu-Ala-Asp) box polypeptide 23	chrX:114828730-114845972	48.6143	55.202	53.9754	0.183342	0.150922	0.0324195	0.543356	0.667637	0.940999	41.3242	47.6591	46.1967	52.1924	55.699	49.6384	64.5669	51.8622	55.266	54.6766	51.5248	48.968	52.4509	62.9579
Hibadh	3-hydroxyisobutyrate dehydrogenase	chr4:147270732-147368793	81.3476	55.1966	92.9931	-0.559521	0.193025	-0.752546	0.00752383	0.548113	0.000653095	73.7169	77.1697	75.0125	76.9645	103.874	45.4201	54.4382	47.5373	84.603	43.9843	100.448	78.2124	114.268	79.0447
Uqcrb	ubiquinol-cytochrome c reductase binding protein	chr7:71297359-71533937	85.3074	55.1251	106.441	-0.629961	0.319315	-0.949276	0.0435858	0.389699	0.00357487	79.8454	72.0563	72.7005	83.7012	118.234	57.6938	41.4833	57.3381	71.88	47.2303	122.029	107.008	125.746	70.9813
Rin2	Ras and Rab interactor 2	chr3:146317464-146510342	37.9822	55.0457	44.1723	0.535304	0.217818	0.317486	0.0186805	0.488967	0.244548	42.0674	37.908	35.9499	31.4193	42.5666	57.176	61.1885	52.3967	51.3705	53.0965	44.7249	40.5801	39.1245	52.2599
Uqcrq	ubiquinol-cytochrome c reductase, complex III subunit VII	chr10:38561410-38564698	70.3612	55.028	90.8504	-0.354614	0.368714	-0.723328	0.145388	0.155356	0.00221111	70.3985	49.8851	59.4273	83.5192	88.5756	65.0826	38.7043	50.9661	58.7422	61.6445	89.9666	85.9753	123.331	64.1285
Ist1	increased sodium tolerance 1 homolog (yeast)	chr19:52793723-52815862	64.09	54.9913	56.5321	-0.220896	-0.181028	-0.0398675	0.435302	0.577126	0.925678	61.282	73.9581	55.8239	69.4225	59.9634	55.5003	53.2954	49.4313	57.1694	59.5599	60.1114	50.8523	52.654	62.5107
Manbal	mannosidase, beta A, lysosomal-like	chr3:158198823-158228409	84.605	54.9799	71.9246	-0.621839	-0.234257	-0.387582	0.00121133	0.43154	0.131352	91.3958	84.0637	63.7526	106.974	76.839	72.7745	47.0019	57.5812	37.2793	60.2625	82.4321	60.8001	64.4826	79.9837
Glo1	glyoxalase 1	chr20:11461654-11479674	81.0436	54.9186	73.2547	-0.561405	-0.145778	-0.415627	0.00677966	0.664637	0.0958784	91.1101	77.6885	79.2227	79.0947	78.1022	49.366	44.3721	58.6237	62.7086	59.5225	87.055	66.561	75.1821	64.2206
Pxn	paxillin	chr12:48595403-48642172	46.8002	54.9153	43.8679	0.230691	-0.093352	0.324043	0.418394	0.812085	0.238694	60.1815	45.9166	42.8173	48.2506	36.8353	58.3509	66.0499	52.4106	41.4058	56.3591	43.5154	42.1427	28.5607	61.2526
Rbm8a	RNA binding motif protein 8A	chr2:218242195-218244962	69.3814	54.9129	70.9102	-0.337405	0.0314434	-0.368848	0.157589	0.942285	0.143045	74.4009	75.2305	63.6227	72.9906	60.6625	62.2231	57.1445	50.1409	51.3671	53.6889	84.1345	71.5462	67.4827	60.4775
Fastk	Fas-activated serine/threonine kinase	chr4:7271938-7275954	63.0856	54.8494	54.0994	-0.201836	-0.221698	0.0198624	0.486619	0.458086	0.963831	62.4279	54.0709	62.2996	82.4311	54.1986	71.1047	51.7386	58.8638	36.0018	56.5379	59.9316	57.3705	52.6203	46.4753
Eef1a1	eukaryotic translation elongation factor 1 alpha 1	chr8:85387881-85391104	57.5668	54.8369	63.8511	-0.070092	0.149473	-0.219565	0.853511	0.662665	0.472417	64.5298	73.3084	61.5845	33.3869	55.0246	38.8128	69.8874	53.2696	58.5151	53.6995	66.6256	59.5087	62.6763	66.5937
Tex264	testis expressed 264	chr8:114720829-114748300	36.5113	54.8293	41.8508	0.586606	0.196916	0.38969	0.00525255	0.546628	0.12551	28.5397	33.2676	36.8407	38.6817	45.2267	61.1112	52.3818	55.1006	47.9346	57.6184	48.6357	39.8973	51.464	27.4064
Oxsr1	oxidative-stress responsive 1	chr8:127127109-127216712	68.1966	54.7746	65.6973	-0.316191	-0.0538657	-0.262326	0.232959	0.904337	0.38718	72.9026	69.48	65.6503	73.6638	59.2861	59.0313	63.9835	50.2651	42.7885	57.8047	72.2684	60.5995	57.0404	72.8808
Taok2	TAO kinase 2	chr1:205285849-205300255	69.1935	54.7127	59.3749	-0.338759	-0.220784	-0.117975	0.192413	0.493658	0.751375	63.2917	70.8634	72.7382	81.1391	57.9349	50.642	60.1543	56.1704	48.013	58.5841	52.0821	59.7693	64.7189	60.9292
Rgs2	regulator of G-protein signaling 2	chr13:65556706-65833989	30.6726	54.5775	41.2349	0.831355	0.426915	0.40444	0.127182	0.452701	0.48076	51.3549	10.9715	20.3176	15.448	55.271	33.7458	13.5772	49.6157	149.372	26.577	61.387	39.3288	41.1054	23.1183
Larp1b	La ribonucleoprotein domain family, member 1B	chr2:147446539-147478244	43.2281	54.5355	50.2823	0.335228	0.218082	0.117146	0.179077	0.483938	0.751375	41.3145	38.4001	35.8599	54.0677	46.4981	64.1196	59.8202	41.7479	56.6555	50.3343	50.1124	53.7749	51.7949	45.4469
Psmd6	proteasome (prosome, macropain) 26S subunit, non-ATPase, 6	chr15:16438828-16447366	54.7462	54.4588	72.0984	-0.00759513	0.397207	-0.404802	0.986652	0.106178	0.107941	64.0514	51.5963	54.2957	48.2089	55.5788	57.6706	47.2834	58.0639	57.2354	52.0404	73.55	74.5173	73.8917	66.4344
Fam3c	family with sequence similarity 3, member C	chr4:49179380-49231971	51.249	54.4324	52.7313	0.0869399	0.0411358	0.0458041	0.808505	0.924214	0.915528	57.7942	45.3296	48.2042	48.1941	56.7231	47.423	49.575	67.821	47.4312	59.9116	53.7938	51.8737	42.6857	62.5722
Cast	calpastatin	chr2:1422024-1530718	51.2477	54.3956	53.4045	0.0860028	0.0594731	0.0265297	0.813186	0.889201	0.952895	56.7901	57.1714	56.9959	42.5239	42.7572	51.5611	58.8724	54.795	53.5794	53.1702	51.9571	47.0747	52.664	61.9221
Mtch2	mitochondrial carrier 2	chr3:86385046-86404836	62.3966	54.3792	110.544	-0.198412	0.825086	-1.0235	0.510122	0.000653095	0.000653095	63.5995	54.4073	44.8827	55.0429	94.0503	50.5281	42.3274	57.1998	73.3726	48.4682	118.867	126.305	136.371	60.6335
Thbs1	thrombospondin 1	chr3:116411044-116422101	1.23652	54.2961	7.38241	5.45649	2.57781	2.87868	0.000653095	0.000653095	0.000653095	0.727868	1.05828	2.43283	0.745033	1.21858	44.8883	56.9856	56.6564	24.4629	88.4873	2.66455	23.5741	2.0868	1.20416
Ppp1cb	protein phosphatase 1, catalytic subunit, beta isozyme	chr6:33416539-33448276	76.7774	54.2642	80.8154	-0.500679	0.0739487	-0.574628	0.0231739	0.856835	0.0169139	87.1655	82.671	77.3634	72.2805	64.4065	54.0102	59.2461	52.2337	50.5126	55.3186	88.6045	66.2136	73.3894	95.0541
Rer1	retention in endoplasmic reticulum sorting receptor 1	chr5:175932624-175944701	53.3319	54.2273	50.198	0.0240192	-0.0873691	0.111388	0.95523	0.822573	0.760756	54.5871	52.1076	52.3475	53.3586	54.2589	60.1793	46.3603	61.1441	43.9822	59.4705	54.105	58.9853	46.4096	41.2922
Sec11c	SEC11 homolog C (S. cerevisiae)	chr18:60686313-60702656	40.0138	54.2259	45.1736	0.438483	0.174981	0.263502	0.0930732	0.643818	0.411685	40.2969	39.3165	27.6465	35.8199	56.9894	51.4878	37.032	70.9586	57.0782	54.5729	52.6846	45.4783	38.6725	43.859
Dync1i2	dynein cytoplasmic 1 intermediate chain 2	chr3:64314254-64364653	58.3818	54.2239	56.033	-0.106589	-0.0592417	-0.0473473	0.761134	0.886788	0.913374	56.6641	68.3826	53.0129	54.1694	59.68	61.5321	47.8045	52.4207	54.2169	55.1454	61.046	51.9133	49.2545	61.9181
Sf3a3	splicing factor 3a, subunit 3	chr5:146473836-146493465	49.5711	54.141	53.823	0.127221	0.118722	0.00849887	0.698187	0.740005	0.984037	44.2019	52.0114	44.8031	52.5255	54.3138	47.0732	62.0675	51.4713	61.4856	48.6073	52.468	54.0039	57.5752	51.2449
Plekho1	pleckstrin homology domain containing, family O member 1	chr2:217601890-217609978	59.3731	54.1363	54.2424	-0.133213	-0.130389	-0.00282381	0.687308	0.718124	0.995809	70.9057	54.9828	62.2113	68.949	39.8169	54.3583	73.2184	44.8279	42.0882	56.1889	55.6218	50.8131	45.9089	64.6258
Zfp91	zinc finger protein 91	chr1:236755855-236792548	72.6316	54.1247	69.2043	-0.42431	-0.0697352	-0.354575	0.0814666	0.875479	0.20511	67.1489	75.4982	66.0056	80.8547	73.6505	61.2032	55.2009	49.0929	54.442	50.6845	79.454	69.5127	62.3802	65.4703
Anapc15	anaphase promoting complex subunit 15	chr1:173172572-173176117	42.2221	54.1074	51.1853	0.357829	0.277733	0.0800959	0.176693	0.37312	0.847694	32.8818	35.8562	37.8559	49.925	54.5913	62.5536	52.9893	60.7025	48.9897	45.3018	61.6192	53.8608	44.9364	44.3248
Mrps25	mitochondrial ribosomal protein S25	chr4:189213383-189225147	75.0767	54.0903	90.9965	-0.472995	0.277446	-0.750441	0.0411154	0.340966	0.000653095	73.4458	77.6496	65.0292	72.2902	86.9686	48.7236	50.9566	56.68	67.2942	46.7972	96.6598	80.1792	115.799	71.348
Asmtl	acetylserotonin O-methyltransferase-like	chr12:20517049-20519715	69.2457	54.0472	62.767	-0.357505	-0.141718	-0.215787	0.151133	0.688461	0.494131	58.2206	62.3487	61.7341	82.8557	81.0695	66.899	43.8741	55.9281	50.5291	53.0057	64.2544	57.5783	72.1088	57.1266
Ppdpf	pancreatic progenitor cell differentiation and proliferation factor	chr3:180401510-180402453	87.4	54.0445	61.2785	-0.693486	-0.512254	-0.181232	0.00173202	0.0371004	0.602044	87.0206	94.4178	90.1659	86.178	79.2178	67.2684	42.8872	57.4368	50.3022	52.3278	66.5565	57.5832	66.9876	53.9865
Mcl1	myeloid cell leukemia sequence 1	chr2:217273157-217275931	46.7103	54.0396	54.6549	0.210277	0.22661	-0.0163331	0.457782	0.458825	0.971046	46.182	53.259	56.5982	42.544	34.9683	45.9542	60.4971	56.5363	58.2844	48.9261	41.8993	67.9882	59.341	49.3911
Vps28	vacuolar protein sorting 28 homolog (S. cerevisiae)	chr7:117672421-117676270	66.5121	53.9973	70.3495	-0.30073	0.0809225	-0.381653	0.24687	0.836276	0.142492	63.9294	62.8212	67.7874	70.8526	67.17	60.4646	50.4939	53.1837	55.1495	50.6949	67.25	72.8753	82.921	58.3518
Sptan1	spectrin, alpha, non-erythrocytic 1	chr3:13878432-13950970	62.8885	53.9912	64.9063	-0.220071	0.0455628	-0.265634	0.488296	0.924384	0.418094	59.994	67.1422	63.6187	58.8404	64.8472	47.2405	54.3745	58.4394	50.1504	59.7512	59.9818	53.2558	62.6587	83.7289
Sgce	sarcoglycan, epsilon	chr4:29634748-29678914	65.5134	53.8518	58.8468	-0.282794	-0.154826	-0.127968	0.27127	0.646133	0.719726	67.6231	70.1985	75.8273	61.3286	52.5893	54.2574	50.7845	55.1647	47.59	61.4626	61.0957	45.1515	60.706	68.4339
Sdhaf2	succinate dehydrogenase complex assembly factor 2	chr1:233493735-233518545	57.9446	53.8145	59.7994	-0.106681	0.0454573	-0.152138	0.756642	0.913125	0.646205	61.5029	60.7392	54.8179	55.3514	57.3116	62.4711	43.7917	56.8723	52.7099	53.2274	68.9803	57.8016	58.0221	54.3937
Lasp1	LIM and SH3 protein 1	chr10:85533430-85573897	36.0047	53.7079	43.1864	0.57695	0.262392	0.314558	0.00715047	0.368455	0.252881	32.1599	32.4996	38.03	28.2903	49.0437	49.5807	51.2929	58.17	54.7954	54.7005	38.2996	46.7989	41.9932	45.6539
Ube2g2	ubiquitin-conjugating enzyme E2G 2	chr20:13866042-13887894	33.8728	53.6826	42.6365	0.664327	0.331961	0.332366	0.00121133	0.208744	0.210787	34.8391	32.9536	38.2048	32.6957	30.6707	58.619	67.2472	49.0015	38.9494	54.5958	47.4939	44.3303	38.7863	39.9355
Tspan2	tetraspanin 2	chr2:224591002-224633366	45.2243	53.6768	49.2284	0.247201	0.122393	0.124807	0.381016	0.738997	0.736727	53.8206	44.42	41.5468	45.5282	40.8059	60.3718	61.1556	53.344	38.9208	54.5919	52.5724	47.4176	42.8293	54.0944
Mgll	monoglyceride lipase	chr4:185912101-186011677	67.072	53.6579	82.424	-0.32192	0.297354	-0.619273	0.202104	0.284254	0.00752383	63.8878	72.3239	59.1949	58.7638	81.1897	42.2199	38.1603	66.5494	69.7212	51.6388	69.9301	66.108	108.775	84.8827
Ndufv1	NADH dehydrogenase (ubiquinone) flavoprotein 1	chr1:226124943-226129979	103.674	53.6516	157.923	-0.950368	0.60716	-1.55753	0.000653095	0.0129683	0.000653095	89.1947	82.885	84.2525	87.2295	174.811	51.0366	36.5867	60.6812	73.3143	46.6392	174.921	138.053	219.809	98.9084
Hk1	hexokinase 1	chr20:33703471-33770598	57.995	53.6456	52.2942	-0.112469	-0.149278	0.0368095	0.748064	0.664171	0.932772	58.6709	55.9838	50.0372	61.9249	63.3582	57.4963	58.0322	55.3178	38.8454	58.5363	48.4708	49.4205	49.0048	62.2806
Spryd3	SPRY domain containing 3	chr7:141517638-141534847	43.7698	53.5888	45.7068	0.291996	0.0624747	0.229521	0.263588	0.877316	0.442283	39.554	36.1919	37.3754	51.5066	54.2211	64.7504	49.5825	51.9841	40.075	61.5521	43.5481	48.0278	42.8708	48.3806
Tob1	transducer of ErbB-2.1	chr10:81746515-81748551	61.5309	53.5626	88.4342	-0.200085	0.523292	-0.723377	0.494829	0.0351614	0.00121133	63.6467	51.2167	67.8859	63.4513	61.4541	39.4672	37.9341	56.8201	72.7096	60.8822	75.7902	88.843	134.657	54.4461
Arl8b	ADP-ribosylation factor-like 8B	chr4:217450493-217494707	54.6066	53.5612	55.6577	-0.0278892	0.0275055	-0.0553947	0.947653	0.950613	0.894514	61.2955	52.6689	53.9883	51.7008	53.3798	50.9572	53.4906	56.4019	52.9994	53.9568	59.8459	59.2309	55.3902	48.1638
Eif1a	eukaryotic translation initiation factor 1A	chr18:40240996-40252356	38.4417	53.5197	49.9955	0.477399	0.379125	0.098274	0.0336811	0.131352	0.789905	37.8575	38.1591	43.2711	36.863	36.0578	50.326	60.7653	56.0731	49.8155	50.6188	49.4441	58.8857	42.1103	49.5417
Pxdc1	PX domain containing 1	chr17:32865486-32893956	42.0433	53.5156	38.8086	0.348085	-0.115498	0.463582	0.152895	0.756035	0.0527477	53.6031	48.688	40.7982	37.4823	29.6448	59.7166	61.9665	49.8967	38.2012	57.7972	40.1065	40.6277	35.0874	39.413
Decr1	2,4-dienoyl CoA reductase 1, mitochondrial	chr5:34253235-34280749	82.6882	53.4991	157.877	-0.628165	0.933049	-1.56121	0.0063956	0.000653095	0.000653095	73.6088	62.0277	67.0039	56.9414	153.859	44.5041	21.1709	59.3137	101.157	41.35	174.291	142.308	228.889	86.0204
Ube2m	ubiquitin-conjugating enzyme E2M	chr1:66348872-66352410	67.8329	53.4424	65.0422	-0.344001	-0.0606096	-0.283392	0.168345	0.886103	0.310791	61.8077	54.238	67.9656	85.3521	69.8011	61.122	50.8804	47.2797	45.1927	62.7371	68.4718	74.2566	63.793	53.6473
Uqcrfs1	ubiquinol-cytochrome c reductase, Rieske iron-sulfur polypeptide 1	chr17:36991587-36995865	75.2191	53.439	153.586	-0.493206	1.02988	-1.52308	0.0363673	0.000653095	0.000653095	67.6972	57.0401	62.6936	59.6264	129.038	42.8691	34.2241	49.9062	94.6309	45.5648	141.613	144.278	239.949	88.5041
Lrrfip2	leucine rich repeat (in FLII) interacting protein 2	chr8:118723097-118824561	56.7318	53.4104	56.6385	-0.0870379	-0.00237629	-0.0846616	0.805569	0.99635	0.825115	53.4874	64.6336	55.3545	63.022	47.1616	55.8883	51.5499	55.7284	46.706	57.1794	53.6649	53.8953	45.8001	73.1936
Npr1	natriuretic peptide receptor A/guanylate cyclase A (atrionatriuretic peptide receptor A)	chr2:209271275-209286963	62.1561	53.3427	51.2045	-0.220606	-0.279627	0.0590212	0.456071	0.346853	0.891043	62.6504	62.1978	59.2226	79.5547	47.1552	54.4786	63.0205	43.7013	43.7155	61.7976	53.5298	54.8719	42.987	53.4291
Abhd4	abhydrolase domain containing 4	chr15:36705477-36717401	54.2968	53.3091	57.8184	-0.0264833	0.0906622	-0.117146	0.947973	0.808994	0.747035	58.8042	50.6461	64.8156	46.8663	50.3516	47.4134	63.2084	49.5847	54.3346	52.0047	53.993	56.3494	64.6568	56.2744
Dync1li2	dynein, cytoplasmic 1 light intermediate chain 2	chr19:739196-762114	49.9799	53.2852	54.6797	0.0923853	0.129657	-0.0372715	0.798348	0.72749	0.932496	46.059	54.0105	47.7461	51.0399	51.0441	50.1507	55.2689	51.9591	54.8428	54.2044	55.2436	59.715	44.9548	58.8054
Cdk10	cyclin-dependent kinase 10	chr19:66729775-66741950	83.4979	53.2229	67.6818	-0.649692	-0.302971	-0.346721	0.00267407	0.321881	0.242267	63.4314	82.651	85.6518	101.481	84.2742	73.7144	46.746	47.5011	45.5569	52.596	97.8489	63.2445	42.6443	66.9894
Itga5	integrin, alpha 5 (fibronectin receptor, alpha polypeptide)	chr7:142750120-142773323	54.374	53.2158	55.213	-0.0310627	0.0220912	-0.0531539	0.945355	0.963128	0.906465	70.6647	54.5188	58.3238	60.708	27.6547	63.5469	59.2652	37.4097	35.3009	70.5562	49.8147	59.2311	42.1586	69.6476
Atp5g3	ATP synthase, H+ transporting, mitochondrial Fo complex, subunit C3 (subunit 9)	chr3:67289965-67292422	65.345	53.2006	59.4069	-0.296636	-0.137448	-0.159188	0.281354	0.713238	0.664171	65.313	74.2977	64.2682	63.5374	59.309	59.8179	51.2078	48.9956	47.1369	58.8447	57.3827	68.625	58.6025	53.0173
C1qa	complement component 1, q subcomponent, A chain	chr5:159023752-159026600	17.7301	53.1677	16.7985	1.58435	-0.0778663	1.66222	0.000653095	0.879202	0.000653095	19.3452	16.876	19.1583	8.80061	24.4703	41.0129	49.2341	77.6221	60.5631	37.4065	20.9831	18.2444	20.4595	7.5071
Cxxc1	CXXC finger protein 1	chr18:69335504-69340566	55.1991	53.1648	48.4957	-0.0541717	-0.186786	0.132614	0.89195	0.557172	0.711093	51.5462	51.8747	50.0258	73.4216	49.1271	63.6394	59.4655	46.362	47.375	48.9823	53.7513	47.8578	40.4889	51.8849
Ufd1l	ubiquitin fusion degradation 1 like (yeast)	chr11:89406801-89430406	52.315	53.1405	51.6404	0.0225874	-0.0187238	0.0413112	0.957934	0.968315	0.923494	53.3508	54.4446	54.909	53.1665	45.7042	63.3825	51.2544	53.3357	45.1764	52.5537	53.0638	54.5021	50.1467	48.8492
Snai1	snail family zinc finger 1	chr3:170425897-170430384	17.4336	53.1275	18.4476	1.60759	0.0815609	1.52602	0.000653095	0.853511	0.000653095	17.7681	18.4433	20.4475	19.8907	10.6185	60.9232	28.3765	85.7941	33.8453	56.6984	18.8194	16.5784	14.0829	24.3097
Rit1	Ras-like without CAAX 1	chr2:207487475-207498920	45.6884	53.091	47.5073	0.216638	0.0563209	0.160317	0.45059	0.894498	0.640524	48.9339	47.6588	41.2252	46.52	44.1043	51.3892	65.6952	50.0415	51.8336	46.4954	48.3769	41.3248	44.5095	55.818
Leprot	leptin receptor overlapping transcript	chr5:124375761-124556585	55.8685	53.0645	47.6089	-0.0742876	-0.230802	0.156515	0.849665	0.471644	0.657669	54.7463	52.1371	54.7488	53.2446	64.4655	58.2589	53.5985	56.0687	42.9272	54.4692	50.3554	39.0496	47.9635	53.0671
Jtb	jumping translocation breakpoint	chr2:209024503-209028723	52.6268	52.8767	55.0923	0.00683296	0.0660514	-0.0592185	0.988275	0.870245	0.890993	48.9816	49.2797	66.4425	55.3334	43.0969	54.0876	56.7883	59.2399	41.4695	52.7981	51.9792	79.0612	46.7417	42.587
Mapre2	microtubule-associated protein, RP/EB family, member 2	chr18:14599143-15549590	51.3605	52.7691	37.0076	0.0390333	-0.472837	0.511871	0.940415	0.149329	0.121047	54.8738	52.8752	52.9087	50.777	45.3678	49.3235	56.5117	61.743	49.9642	46.303	37.237	36.0806	36.7453	37.9675
Pdlim5	PDZ and LIM domain 5	chr2:266348748-266518443	42.768	52.7501	60.6559	0.302641	0.504116	-0.201475	0.247331	0.0446393	0.53292	68.5654	36.3576	36.2055	46.4737	26.2379	44.1716	69.8823	43.1881	53.508	53.0004	45.6001	36.8078	60.6581	99.5578
Nav2	neuron navigator 2	chr1:105631321-105994388	37.105	52.7401	45.9856	0.507289	0.309568	0.197721	0.0548118	0.352305	0.610016	34.1295	24.2377	37.9255	57.6365	31.5958	64.1275	65.3012	46.529	33.6355	54.1076	46.747	31.0757	34.6947	71.4248
Bfar	bifunctional apoptosis regulator	chr10:361769-394582	44.8056	52.6724	45.7161	0.233368	0.0290212	0.204347	0.408226	0.949078	0.522233	43.7799	43.2035	38.9683	51.636	46.4405	66.0137	55.9638	46.8746	47.9093	46.6008	52.2137	48.3672	42.0726	40.2107
Atp1a2	ATPase, Na+/K+ transporting, alpha 2 polypeptide	chr13:95173342-95198290	106.682	52.658	164.896	-1.01859	0.628237	-1.64683	0.000653095	0.0336811	0.000653095	103.17	90.4897	94.1689	79.5564	166.026	32.1733	25.9229	64.3148	101.597	39.2821	174.116	127.674	251.18	106.612
Nabp2	nucleic acid binding protein 2	chr7:2798469-2804072	48.8133	52.6435	43.225	0.108981	-0.175408	0.284389	0.758369	0.609355	0.329693	39.2665	47.7678	47.1334	61.1447	48.754	61.2859	46.0287	51.7316	44.8302	59.3411	39.6333	43.7807	50.3639	39.122
Capza2	capping protein (actin filament) muscle Z-line, alpha 2	chr4:45541351-45577242	53.556	52.6156	59.2554	-0.0255591	0.145898	-0.171457	0.949383	0.672242	0.60155	56.0389	51.6023	50.9884	54.11	55.0405	58.3951	51.7293	51.7261	49.5634	51.6639	66.4278	62.1684	55.3753	53.05
Rasl12	RAS-like, family 12	chr8:70607874-70622107	140.825	52.5897	89.0478	-1.42105	-0.661251	-0.759801	0.000653095	0.00441716	0.000653095	139.857	161.693	140.875	153.94	107.761	57.3029	76.8724	37.1419	45.1134	46.5178	103.762	72.9677	76.8446	102.617
Pdk4	pyruvate dehydrogenase kinase, isozyme 4	chr4:30453697-30463700	39.9371	52.5879	119.173	0.397	1.57726	-1.18026	0.232447	0.000653095	0.000653095	44.3347	25.0516	30.3104	23.8247	76.1641	17.5091	30.6466	19.2637	164.708	30.8117	118.035	97.5654	208.861	52.2311
Ssr1	signal sequence receptor, alpha	chr17:29410634-29426438	46.208	52.5348	53.9309	0.185129	0.222967	-0.0378384	0.52772	0.456003	0.931475	48.079	46.0849	45.6307	44.2916	46.9541	52.0269	38.113	54.8487	57.0352	60.6501	44.3894	54.0936	58.8128	58.4277
Commd1	copper metabolism (Murr1) domain containing 1	chr14:107724469-107835993	67.0308	52.517	61.9898	-0.35204	-0.112792	-0.239248	0.511239	0.88124	0.740507	54.797	67.8942	67.9526	66.3317	78.1783	62.1002	45.178	61.8164	49.0671	44.4232	75.1725	64.3917	58.4696	49.9256
Sec61a1	Sec61 alpha 1 subunit (S. cerevisiae)	chr4:185693503-185707859	46.2313	52.4908	50.2551	0.183194	0.120401	0.0627938	0.543766	0.745975	0.879202	54.1514	47.0336	49.1613	47.1989	33.6112	61.5157	47.6821	59.4174	36.167	57.6717	44.7668	67.3442	40.9215	47.988
Csad	cysteine sulfinic acid decarboxylase	chr7:141579240-141591096	74.2133	52.4617	86.8302	-0.500413	0.226519	-0.726932	0.0280164	0.472951	0.000653095	67.9013	68.6423	72.5125	71.8662	90.1444	54.3486	36.7605	51.6673	72.1779	47.3543	105.888	74.0149	93.9179	73.4997
Dbn1	drebrin 1	chr17:11788596-11802569	83.9973	52.3558	59.5171	-0.681994	-0.497038	-0.184955	0.000653095	0.0424125	0.568007	62.3055	87.3158	91.1821	82.9485	96.2348	60.5368	41.6591	54.039	44.0847	61.4595	53.5352	52.9739	51.9064	79.6531
RT1-Bb	RT1 class II, locus Bb	chr20:6123271-6128913	5.24537	52.3225	5.83639	3.31832	0.154033	3.16428	0.000653095	0.863465	0.0212459	4.26481	3.30714	9.1865	2.32824	7.14015	48.4381	36.8333	75.9288	62.4185	37.9938	5.20422	10.4789	7.6625	0
Commd3	COMM domain containing 3	chr17:87079391-87083185	49.6736	52.2954	48.1575	0.0742067	-0.0447182	0.118925	0.844108	0.918943	0.752204	61.5806	44.2006	43.2497	53.1391	46.1978	53.3845	49.6127	56.4175	46.8318	55.2307	46.4723	53.2787	43.4451	49.4339
Tmem176b	transmembrane protein 176B	chr4:143138366-143145822	27.4205	52.2826	23.6571	0.931078	-0.212983	1.14406	0.000653095	0.577077	0.000653095	23.46	31.4437	29.9552	28.009	24.2345	50.8184	54.2757	74.1625	51.578	30.5786	25.0197	38.0565	17.9981	13.554
Mrpl53	mitochondrial ribosomal protein L53	chr4:178627011-178627898	55.1898	52.2	58.4332	-0.0803517	0.0823871	-0.162739	0.83871	0.843082	0.668049	51.531	56.1923	53.237	53.2258	61.7629	55.0677	44.8562	44.248	53.937	62.891	59.4101	65.1374	68.4973	40.688
Cisd1	CDGSH iron sulfur domain 1	chr20:20659780-20673162	58.0266	52.1856	83.37	-0.153064	0.522815	-0.675878	0.657978	0.0301061	0.00313022	57.7075	41.3829	47.0762	64.8752	79.0913	49.9889	47.3779	46.7487	73.4074	43.4048	92.583	83.2378	97.2494	60.41
Clk4	CDC-like kinase 4	chr10:36480644-36504762	52.5345	52.0786	57.0546	-0.0125747	0.119079	-0.131654	0.977375	0.752103	0.719726	56.2569	54.2544	47.957	55.4704	48.7337	47.2167	56.6867	46.5173	63.9722	46	64.5089	56.3733	58.9517	48.3847
Brd4	bromodomain containing 4	chr7:14378186-14457537	51.9758	52.064	50.4155	0.00244465	-0.0439742	0.0464189	0.995809	0.923861	0.920221	52.5407	50.1957	49.035	53.9469	54.1609	48.0222	53.3829	50.1548	53.4044	55.3557	44.0165	41.9753	50.8588	64.8114
Atp1b1	ATPase, Na+/K+ transporting, beta 1 polypeptide	chr13:87491656-87641967	35.4816	52.0478	35.2422	0.552765	-0.00976737	0.562533	0.032673	0.984047	0.0385264	38.943	34.5411	44.8763	33.0233	26.0244	51.2987	104.258	41.8322	27.6079	35.2428	33.7442	41.4908	34.6441	31.0898
Zcchc7	zinc finger, CCHC domain containing 7	chr5:64759111-64938827	54.3601	52.0315	49.3421	-0.063163	-0.13973	0.0765668	0.868437	0.686521	0.845819	54.0505	59.5272	52.577	51.1712	54.4745	51.7614	50.3686	45.4473	58.7407	53.8394	52.5889	51.2601	46.5815	46.9377
Gyg1	glycogenin 1	chr2:124636894-124676136	36.9692	51.9269	50.6508	0.49016	0.454262	0.0358982	0.029627	0.0620184	0.932469	42.5733	32.0572	36.2483	34.1279	39.8391	58.8627	47.4536	59.9737	41.8722	51.4725	59.9965	50.7501	41.9364	49.9201
LOC500300	similar to hypothetical protein MGC6835	chr4:214707826-214742088	53.5696	51.8807	53.1601	-0.0462168	-0.0110724	-0.0351445	0.914796	0.981803	0.942967	70.8847	50.954	37.908	63.3853	44.7162	52.7482	52.7016	43.1081	60.9383	49.9074	55.457	76.3792	62.041	18.7631
Mlec	malectin	chr12:49014185-49024662	31.3956	51.877	40.527	0.724532	0.368319	0.356214	0.000653095	0.169057	0.169428	25.7715	27.1213	27.3456	27.6354	49.1043	49.9678	44.0078	61.0763	41.7881	62.5451	38.7213	31.7976	46.021	45.5681
Acvrl1	activin A receptor type II-like 1	chr7:140577003-140588083	67.2257	51.8225	53.1994	-0.375435	-0.337604	-0.0378314	0.128102	0.215054	0.93179	63.4122	62.1106	62.4548	80.0283	68.1228	61.7814	42.3522	59.0359	38.792	57.1511	53.6812	56.1529	43.9851	58.9784
Per1	period circadian clock 1	chr10:55430183-55439080	94.966	51.7967	55.9269	-0.874551	-0.763868	-0.110684	0.000653095	0.00267407	0.774333	92.9474	118.261	97.0386	124.857	41.7264	48.5129	62.3577	46.5567	44.2775	57.2786	50.2973	68.6563	74.0795	30.6747
Fxr2	fragile X mental retardation, autosomal homolog 2	chr10:55983451-56003515	60.4109	51.7526	50.4579	-0.223178	-0.259729	0.0365506	0.423406	0.377	0.930796	54.1699	59.8101	55.3609	75.7086	57.0051	58.0076	60.1042	44.8664	43.5361	52.2486	52.2559	53.4932	47.2688	48.8138
Psmc5	proteasome (prosome, macropain) 26S subunit, ATPase, 5	chr10:94197178-94203113	60.1043	51.7459	61.9699	-0.216025	0.0440992	-0.260124	0.443328	0.917835	0.369538	60.1983	50.0837	55.5182	72.5723	62.1493	52.1321	48.348	46.4314	57.1508	54.6672	59.7567	66.484	66.926	54.713
Mrpl54	mitochondrial ribosomal protein L54	chr7:11488464-11490985	58.8617	51.7411	62.7984	-0.18602	0.0933976	-0.279417	0.577224	0.818519	0.374515	58.7496	63.0389	51.0548	57.7297	63.7355	68.4595	37.7231	58.2991	41.6429	52.5808	68.2072	66.138	59.8282	57.0201
Fam98a	family with sequence similarity 98, member A	chr6:30945056-30959714	54.2084	51.6917	58.4607	-0.0685822	0.108952	-0.177534	0.853423	0.771486	0.586974	50.2865	51.9185	49.8869	56.3459	62.604	54.9558	43.992	54.5471	51.0998	53.8639	56.0933	55.5638	63.0367	59.1491
Psmc2	proteasome (prosome, macropain) 26S subunit, ATPase 2	chr4:9868268-9882520	64.9556	51.68	66.899	-0.32985	0.0425305	-0.37238	0.178726	0.916824	0.136909	61.6603	64.2805	66.0183	71.6519	61.1671	60.1506	45.8261	47.7499	47.6173	57.0559	63.9571	73.0356	65.1372	65.4662
Agpat1	1-acylglycerol-3-phosphate O-acyltransferase 1	chr20:6381700-6596927	57.22	51.6542	56.6338	-0.147633	-0.0148552	-0.132778	0.897629	0.991886	0.912626	59.2259	51.3671	60.8215	65.367	49.3186	63.6975	46.2187	54.2315	40.6043	53.5191	57.4572	66.7202	53.5093	48.8486
Ak3	adenylate kinase 3	chr1:254383081-254408283	146.007	51.6283	75.415	-1.49981	-0.953116	-0.54669	0.000653095	0.000653095	0.0209626	180.161	185.985	138.875	134.699	90.3155	63.3579	58.6982	46.1979	45.1823	44.7053	92.2588	76.2235	66.3179	66.8599
Rab9a	RAB9A, member RAS oncogene family	chrX:29918169-29940588	62.1482	51.5216	63.7343	-0.270537	0.036356	-0.306893	0.30056	0.929963	0.261705	67.1112	66.9091	64.8433	54.3778	57.4998	50.7287	54.953	48.262	44.3568	59.3072	68.1291	60.843	58.7894	67.1756
Sirt2	sirtuin 2	chr1:88130544-88153086	57.8733	51.4985	49.3477	-0.168366	-0.229915	0.0615488	0.571166	0.435878	0.879202	56.5485	64.1916	58.6981	56.3002	53.628	54.0325	57.9643	48.7635	44.7331	51.9992	51.9822	44.2476	50.027	51.134
Akirin2	akirin 2	chr5:54571148-54585491	51.9332	51.4407	54.8649	-0.0137482	0.0792243	-0.0929726	0.974966	0.839713	0.806091	48.023	59.4551	58.6924	46.4744	47.0213	62.2274	49.9992	50.1234	48.7254	46.1281	56.0634	57.859	51.2344	54.3026
Snap23	synaptosomal-associated protein 23	chr3:118880899-118909858	46.0971	51.4149	51.4026	0.157508	0.157164	0.0003438	0.608098	0.643694	0.999121	39.9014	45.4372	49.8851	48.4497	46.8124	51.0604	48.7228	53.2412	52.9359	51.114	52.2472	60.415	47.2609	45.6873
RT1-Ba	RT1 class II, locus Ba	chr20:6146270-6150864	6.40648	51.3806	7.08945	3.00362	0.146143	2.85748	0.000653095	0.811372	0.000653095	6.73652	4.75733	8.57758	5.51631	6.44464	47.2174	35.7749	77.9754	58.8513	37.0842	5.36832	12.0376	8.82907	2.12279
Esf1	ESF1, nucleolar pre-rRNA processing protein, homolog (S. cerevisiae)	chr3:139635098-139688205	61.7374	51.349	64.3578	-0.265808	0.0599719	-0.32578	0.323029	0.88734	0.233313	64.5369	62.7393	59.355	58.2873	63.7684	52.4939	48.942	45.1216	58.2786	51.9088	75.9938	60.629	58.1203	62.6882
Bcas2	breast carcinoma amplified sequence 2	chr2:225092497-225100379	55.7365	51.3487	52.1514	-0.118296	-0.0959177	-0.022378	0.73852	0.804202	0.961553	58.5779	55.855	56.4606	56.4734	51.3156	50.1293	53.7107	56.1196	55.3806	41.4032	56.2814	48.8378	50.1485	53.3377
Scamp3	secretory carrier membrane protein 3	chr2:207905686-207911472	54.1324	51.3285	57.2043	-0.0767332	0.0796309	-0.156364	0.830895	0.840301	0.64285	57.6857	58.1463	54.1161	55.6721	45.0418	56.4871	45.0508	58.0333	44.4663	52.6047	44.8711	58.4696	72.547	52.9294
Slc6a8	solute carrier family 6 (neurotransmitter transporter), member 8	chr1:152879305-152888609	45.6955	51.274	39.557	0.166175	-0.208119	0.374294	0.597888	0.509803	0.148818	51.7123	45.4319	43.3947	48.427	39.5116	53.1399	59.6994	48.1638	44.6941	50.6726	41.045	36.864	34.5097	45.8092
Zfp207	zinc finger protein 207	chr10:67189250-67811744	49.3386	51.2728	55.3961	0.0554769	0.167066	-0.11159	0.971229	0.89635	0.938602	53.2179	50.7949	57.1992	39.9896	45.4915	45.0115	49.6053	53.0093	53.7925	54.9456	47.804	58.4562	60.3123	55.0118
Ggnbp2	gametogenetin binding protein 2	chr10:72063587-72095167	55.6817	51.2272	56.2722	-0.120293	0.0152181	-0.135511	0.726444	0.974182	0.706529	63.0255	59.8459	54.4413	50.8131	50.2829	54.0834	52.5908	51.357	55.6444	42.4605	66.1915	55.7894	48.1851	54.9227
Dnpep	aspartyl aminopeptidase	chr9:82274789-82283660	40.5844	51.2016	38.7756	0.335262	-0.065776	0.401038	0.18672	0.873717	0.117934	40.5137	45.2235	36.1101	48.6928	32.382	77.4804	49.8095	49.178	31.2913	48.2487	47.8422	39.9923	31.4737	35.7944
Sgcb	sarcoglycan, beta (dystrophin-associated glycoprotein)	chr14:36936099-36951529	55.593	51.1727	55.2887	-0.119527	-0.00791917	-0.111608	0.724229	0.985894	0.76384	62.0998	61.4307	51.8583	52.6336	49.9426	56.4566	52.0848	53.4532	47.481	46.3881	59.8935	56.2615	53.5784	51.4212
Akt1	v-akt murine thymoma viral oncogene homolog 1	chr6:146226686-146243773	47.3785	51.1653	51.791	0.110933	0.128469	-0.0175362	0.748078	0.72603	0.967213	57.4426	38.6069	45.1228	54.6334	41.087	53.6898	54.3853	56.5686	41.0054	50.1774	42.7813	56.9142	57.6728	49.7958
Guk1	guanylate kinase 1	chr10:45291711-45299982	51.5667	51.1372	61.2359	-0.0120661	0.247938	-0.260004	0.978014	0.416063	0.388885	43.0299	51.6968	46.4272	55.6354	61.0442	62.8893	45.0712	58.4177	38.9161	50.3917	68.299	62.2211	61.5535	52.87
Ech1	enoyl CoA hydratase 1, peroxisomal	chr1:88190415-88196614	49.8351	51.096	91.715	0.036048	0.879996	-0.843948	0.936218	0.000653095	0.000653095	45.1563	35.3965	50.7477	42.604	75.271	40.137	25.0655	36.9395	117.707	35.6314	97.8832	75.8669	132.84	60.2693
RGD1305178	similar to Hypothetical protein MGC11690	chr3:15172587-15180859	55.8403	51.0874	64.9242	-0.128339	0.217449	-0.345788	0.693972	0.470665	0.181912	62.4919	58.3704	49.2293	54.7908	54.3191	56.3498	50.2494	52.295	45.5405	51.0025	71.0841	53.8601	58.6356	76.1169
Pqbp1	polyglutamine binding protein 1	chrX:16230184-16234365	55.0689	51.0386	55.5259	-0.10965	0.0119225	-0.121573	0.752663	0.978999	0.744738	50.1395	55.7197	55.9332	54.5254	59.0269	46.6809	46.0487	60.1839	57.5001	44.7794	51.4403	63.7724	54.0572	52.8338
Prrc2a	proline-rich coiled-coil 2A	chr20:7213146-7226658	62.4585	50.9531	54.2584	-0.293726	-0.20305	-0.0906764	0.298807	0.55361	0.826994	57.4185	62.4125	62.9988	71.1894	58.273	46.843	53.2635	50.752	46.1242	57.783	49.4544	42.3415	60.5427	64.6951
Dld	dihydrolipoamide dehydrogenase	chr6:59273426-59293925	67.6996	50.9173	113.891	-0.41099	0.750432	-1.16142	0.0882008	0.000653095	0.000653095	61.9726	47.7729	59.2148	56.9325	112.605	38.4291	41.3841	54.0752	80.6229	40.0753	111.862	112.504	160.764	70.4329
Ss18	synovial sarcoma translocation, Chromosome 18	chr18:5987817-6050274	41.4703	50.9117	43.7158	0.295918	0.0760745	0.219844	0.242584	0.845069	0.467917	41.1941	42.7208	39.8034	41.6432	41.9901	51.5475	45.3097	50.7783	46.291	60.6321	45.7552	48.5309	39.2982	41.2788
Rab11a	RAB11a, member RAS oncogene family	chr8:69896586-69919171	43.4962	50.8279	48.8436	0.224733	0.167283	0.0574502	0.41433	0.607159	0.890993	42.5293	43.4692	45.8275	38.7892	46.8655	42.8234	52.9143	52.5878	55.0389	50.7752	44.6487	55.934	51.2112	43.5806
Fuca1	fucosidase, alpha-L- 1, tissue	chr5:158034146-158051397	26.6731	50.7997	32.6389	0.929435	0.291206	0.638229	0.000653095	0.325612	0.00441716	25.795	23.5542	30.2969	29.019	24.7004	54.9516	50.7833	57.7215	39.6585	50.8837	25.9712	41.0319	33.5075	30.0449
Cct4	chaperonin containing Tcp1, subunit 4 (delta)	chr14:107843410-107856260	63.1783	50.724	75.1797	-0.316762	0.250913	-0.567675	0.19995	0.398784	0.0138951	58.8627	70.3462	62.7757	66.659	57.2481	52.8641	53.4682	52.0395	48.4282	46.8199	83.0966	76.6072	72.3421	68.6729
Fahd1	fumarylacetoacetate hydrolase domain containing 1	chr10:14030532-14031972	63.5897	50.7077	96.8848	-0.326588	0.607477	-0.934065	0.199945	0.0063956	0.000653095	65.0615	53.713	50.3245	59.7067	89.1428	49.1773	38.19	45.6152	79.6537	40.9022	119.152	94.8787	99.8264	73.6816
Kidins220	kinase D-interacting substrate 220	chr6:52955624-53048254	40.0678	50.6946	43.287	0.339389	0.111493	0.227896	0.209018	0.776267	0.49891	38.5876	41.8257	40.4246	39.4255	40.0754	42.7857	75.6024	44.7483	44.1085	46.2278	44.6748	36.6116	40.8136	51.0482
Nrgn	neurogranin	chr8:40015872-40024017	55.086	50.6945	44.2797	-0.119857	-0.315042	0.195185	0.763038	0.296947	0.606976	90.459	29.4214	82.1414	43.9947	29.4135	119.99	35.9305	54.0296	14.4685	29.0538	74.6519	40.9947	30.0421	31.4299
Nt5e	5' nucleotidase, ecto	chr8:95464590-95508299	11.3904	50.6674	16.8938	2.15324	0.568678	1.58457	0.000653095	0.0220975	0.000653095	12.6782	12.9592	11.8138	9.59528	9.90527	46.9939	72.7078	43.837	33.4455	56.3528	13.3945	23.6848	16.6542	13.8417
Polr2c	polymerase (RNA) II (DNA directed) polypeptide C	chr19:10569861-10576644	61.0935	50.6495	58.1524	-0.270471	-0.0711787	-0.199292	0.309416	0.857664	0.51772	65.4338	59.2363	52.4069	71.6527	56.7375	63.7296	50.0676	43.835	47.7333	47.8818	70.699	58.7383	55.8549	47.3175
Ptp4a3	protein tyrosine phosphatase type IVA, member 3	chr7:114918556-114924152	84.6858	50.5624	63.1762	-0.744055	-0.422738	-0.321317	0.000653095	0.100166	0.247423	99.2753	90.852	70.5226	100.011	62.7682	53.6415	77.0945	48.5145	32.606	40.9555	80.9178	64.53	39.8316	67.4255
Ntf3	neurotrophin 3	chr4:225638800-225707719	47.6741	50.5538	38.61	0.0846144	-0.30423	0.388845	0.830895	0.330684	0.142305	99.0089	31.5316	31.319	41.4001	35.111	49.2282	65.8036	49.7545	41.1912	46.7917	34.9515	32.4321	31.2257	55.831
Dctn1	dynactin 1	chr4:179465835-179485633	51.0667	50.5306	52.6817	-0.0152274	0.0449175	-0.0601449	0.973192	0.917907	0.88608	46.5484	54.1667	47.6543	50.4783	56.4859	43.1718	62.0619	50.2307	47.9044	49.284	50.3887	43.0797	52.1872	65.071
Cops6	COP9 signalosome subunit 6	chr12:21361016-21363856	52.7862	50.4617	57.4746	-0.0649722	0.122762	-0.187735	0.86673	0.73791	0.558504	52.9413	50.4555	49.9145	53.7513	56.8686	45.0437	48.9513	56.2768	57.302	44.7347	53.4524	59.0578	60.0111	57.3769
LOC689226	NA	chr5:62002657-62061599	56.363	50.4465	51.6031	-0.159993	-0.127288	-0.0327045	0.609042	0.726657	0.942967	56.2063	50.6906	55.9054	69.3717	49.6408	64.1136	44.3517	51.6644	41.2718	50.831	45.4399	48.7625	50.8186	61.3916
Ttc1	tetratricopeptide repeat domain 1	chr10:29182722-29208093	62.4706	50.4391	57.8239	-0.308635	-0.111513	-0.197122	0.220916	0.761134	0.532215	69.5407	65.2475	63.2084	58.0712	56.2853	53.6954	44.8042	48.2792	63.8123	41.6044	66.4554	52.9686	58.3489	53.5225
Chmp4c	charged multivesicular body protein 4C	chr2:113334155-113397419	43.6355	50.4066	47.4329	0.208109	0.120384	0.0877249	0.469094	0.741361	0.816928	50.1869	40.4437	44.5313	51.1401	31.8755	57.7408	66.6759	44.6655	33.0988	49.852	54.8459	41.3212	41.1913	52.3731
Eny2	enhancer of yellow 2 homolog (Drosophila)	chr7:83362800-83371599	43.3333	50.3723	48.3884	0.217153	0.159183	0.0579695	0.438788	0.629902	0.886272	51.0046	38.2256	41.9457	46.9329	38.5579	50.7021	53.5073	46.4343	50.758	50.4596	48.2142	57.7854	49.0851	38.4689
Lsp1	lymphocyte-specific protein 1	chr1:222524151-222557295	52.3629	50.3663	33.5273	-0.0560842	-0.643206	0.587122	0.886096	0.00677966	0.0142233	61.0378	58.3184	58.6779	39.9854	43.7949	61.4997	40.6002	61.39	40.4334	47.9085	29.4886	38.9535	27.1993	38.4681
Babam1	BRISC and BRCA1 A complex member 1	chr16:19652970-19659002	53.0866	50.3418	50.5328	-0.0765918	-0.07113	-0.00546183	0.839818	0.861762	0.991117	57.0641	52.3883	48.6818	57.0747	50.2243	58.8848	47.7524	52.1982	40.7881	52.0855	51.1586	51.7128	50.1092	49.1505
Dnaja2	DnaJ (Hsp40) homolog, subfamily A, member 2	chr19:33576435-33594580	51.3832	50.309	57.5559	-0.0304825	0.163666	-0.194148	0.940999	0.620382	0.529607	52.5592	54.8512	47.6272	50.4513	51.4273	45.1684	51.7517	49.4447	62.35	42.83	52.3264	60.2648	56.6584	60.9739
Iffo1	intermediate filament family orphan 1	chr4:224676330-224693515	41.1367	50.2471	31.5361	0.288611	-0.383425	0.672036	0.269315	0.132479	0.00221111	40.1031	44.2257	34.3953	52.6044	34.3552	56.7703	62.5641	47.1181	39.5226	45.2602	36.2468	34.2756	22.9083	32.7136
Tubb6	tubulin, beta 6 class V	chr18:62314820-62324460	44.8216	50.2209	58.987	0.164091	0.396202	-0.23211	0.591412	0.115072	0.436333	56.9908	42.7422	39.7417	44.0659	40.5676	59.9307	43.1846	51.1376	37.2212	59.6301	44.1702	73.0817	50.64	68.0561
Ramp2	receptor (G protein-coupled) activity modifying protein 2	chr10:88965678-88967458	44.8292	50.1746	30.3521	0.162518	-0.562642	0.72516	0.6452	0.04221	0.00267407	57.8811	46.6747	46.1707	48.9901	24.4294	64.6334	45.4774	60.6653	40.1921	39.9046	25.9455	38.4599	34.472	22.5309
Prpf6	pre-mRNA processing factor 6	chr3:180807599-180871660	60.1532	50.1411	60.5891	-0.262649	0.0104158	-0.273064	0.327949	0.981266	0.341912	55.9249	58.5857	59.2781	60.7051	66.2722	47.4964	52.3437	47.3617	53.0629	50.4407	63.9348	46.9032	59.145	72.3732
Dnajc3	DnaJ (Hsp40) homolog, subfamily C, member 3	chr15:107610328-107649355	34.5741	50.0655	44.879	0.534124	0.376348	0.157775	0.0151083	0.15768	0.63935	37.673	29.7642	38.6467	28.2299	38.5568	47.9537	46.4419	58.6722	47.7793	49.4803	45.8467	47.6312	37.1713	48.867
Cebpb	CCAAT/enhancer binding protein (C/EBP), beta	chr3:170577327-170579362	40.2454	49.9956	55.0294	0.312979	0.45138	-0.138401	0.215373	0.0688693	0.69376	54.9369	32.6371	41.0679	35.7953	36.7896	46.8964	45.2499	54.8543	56.2763	46.7011	62.6088	58.0562	66.6597	32.7927
Fam129b	family with sequence similarity 129, member B	chr3:17257992-17346096	42.694	49.9622	39.866	0.226803	-0.0988759	0.325679	0.496101	0.823618	0.312292	48.7983	44.443	33.795	43.3958	43.038	64.3454	41.448	51.7115	29.706	62.5999	36.6464	51.4036	25.4515	45.9624
RT1-Da	RT1 class II, locus Da	chr20:6207781-6212754	4.99032	49.955	6.27494	3.32343	0.330469	2.99296	0.000653095	0.529829	0.000653095	5.1194	5.2541	6.0392	3.69892	4.83997	36.0147	42.0648	70.7326	62.7809	38.1821	3.4647	10.8968	8.08115	2.65705
Eapp	E2F-associated phosphoprotein	chr6:85101901-85129252	55.1007	49.8805	60.7534	-0.143595	0.140894	-0.284489	0.741683	0.753224	0.454187	56.763	50.1819	55.7196	55.612	57.227	37.1848	58.9176	50.7842	60.0257	42.4901	63.2912	61.1596	62.478	56.0846
Ldlrad4	low density lipoprotein receptor class A domain containing 4	chr18:63020277-63298831	54.4892	49.8152	55.1783	-0.129383	0.0181298	-0.147513	0.785771	0.977358	0.77739	57.4926	54.0126	58.1417	57.2641	45.535	60.0858	43.7993	43.6175	43.0262	58.5474	63.9879	54.8248	40.3203	61.5801
Rpl36al	ribosomal protein L36a-like	chr18:1551748-1553143	45.3797	49.7519	41.7814	0.132704	-0.119189	0.251893	0.737522	0.787326	0.474889	46.411	46.1809	41.6896	52.553	40.0642	46.6987	45.7464	56.7766	51.4017	48.1362	46.2672	42.7622	46.9038	31.1922
Tpr	translocated promoter region, nuclear basket protein	chr13:72576528-72653723	48.6471	49.7453	53.4698	0.0322078	0.136372	-0.104164	0.956762	0.739472	0.863619	47.022	48.8833	41.0609	47.6819	58.5873	44.6035	50.0689	51.2314	51.3197	51.5031	54.4191	48.1906	51.2559	60.0137
Aox1	aldehyde oxidase 1	chr9:64726636-64804786	34.3262	49.7189	30.2966	0.534487	-0.180152	0.714639	0.10696	0.583272	0.0346397	27.399	40.472	42.5867	26.2213	34.9518	17.01	51.7883	16.6038	144.952	18.2411	31.1188	25.4561	36.8957	27.7158
Nrd1	nardilysin 1	chr5:132471998-132534157	49.5877	49.7143	58.2514	0.00367708	0.23231	-0.228632	0.994697	0.455986	0.456591	44.5191	48.1963	43.2996	50.988	60.9356	45.7111	47.6654	47.8327	58.454	48.9082	67.6434	53.2139	54.0901	58.0581
Ddx47	DEAD (Asp-Glu-Ala-Asp) box polypeptide 47	chr4:233048047-233060508	56.9054	49.6928	47.8642	-0.195528	-0.249616	0.054088	0.498747	0.387005	0.895747	60.5901	55.0364	44.2613	66.4947	58.1442	52.569	60.2795	49.4743	45.144	40.9971	52.2664	44.3683	42.6937	52.1285
Nmt1	N-myristoyltransferase 1	chr10:90898209-90933052	39.8638	49.6533	43.3424	0.316808	0.120699	0.19611	0.199597	0.736517	0.527664	34.3495	36.64	35.0414	49.7899	43.4983	57.409	48.4138	43.4245	52.7592	46.2597	41.5461	42.1077	44.47	45.2458
Plcb4	phospholipase C, beta 4	chr3:135089808-135459237	46.9887	49.6122	44.0745	0.0783839	-0.0923685	0.170752	0.845069	0.818541	0.628004	55.7641	55.0022	40.6909	46.4161	37.07	48.3007	70.1043	45.9944	37.5516	46.1102	40.023	41.6104	37.6674	56.9971
Arl2bp	ADP-ribosylation factor-like 2 binding protein	chr19:10747781-10757367	63.7916	49.6017	62.6935	-0.362978	-0.0250505	-0.337927	0.126058	0.956	0.201623	68.3989	60.7594	59.9297	64.9301	64.9399	50.3829	46.4718	51.702	46.5729	52.8788	62.0141	64.1434	62.1784	62.4381
Snf8	SNF8, ESCRT-II complex subunit	chr10:83661433-83673397	54.1715	49.5775	58.8465	-0.127847	0.119424	-0.247271	0.723986	0.758369	0.428526	68.3734	51.9892	51.8828	52.2056	46.4064	56.667	47.8785	57.1998	42.7277	43.4147	58.9505	62.5336	57.8543	56.0478
Actr1b	ARP1 actin-related protein 1 homolog B, centractin beta (yeast)	chr9:42919560-42929225	58.44	49.5602	58.3266	-0.237776	-0.00280281	-0.234973	0.397364	0.995809	0.436471	62.8406	50.2845	60.745	63.721	54.6089	53.4897	56.9116	52.9911	38.2142	46.1941	59.1069	64.2241	52.2605	57.7148
Ppp2r5c	protein phosphatase 2, regulatory subunit B', gamma	chr6:143982520-144075381	42.7316	49.5276	50.5201	0.212927	0.241552	-0.0286251	0.448294	0.408817	0.947973	44.87	40.0885	42.6012	39.9376	46.1609	40.104	52.0107	55.058	49.2161	51.249	40.5827	47.0617	60.406	54.03
Nr2f2	nuclear receptor subfamily 2, group F, member 2	chr1:132487762-132493715	38.0288	49.5142	35.1624	0.380751	-0.113055	0.493806	0.109668	0.761227	0.0444239	44.5558	43.6529	35.7416	31.9948	34.1986	46.4779	58.4283	46.804	58.0283	37.8324	40.1497	40.7276	26.2558	33.5168
Tspyl1	TSPY-like 1	chr20:42813239-42815799	56.7556	49.4557	54.8483	-0.198626	-0.0493154	-0.149311	0.492627	0.90464	0.665053	54.1245	61.161	55.1153	50.9803	62.3968	51.4546	56.8638	44.8067	47.1969	46.9562	63.65	50.5505	46.8901	58.3026
Scaf1	SR-related CTD-associated factor 1	chr1:102062334-102072857	64.7798	49.4445	51.4505	-0.389735	-0.332361	-0.0573749	0.113885	0.233568	0.890122	49.3406	65.6672	62.712	86.3651	59.8141	52.0615	52.4177	43.1295	43.3316	56.282	53.4674	48.0573	51.924	52.3531
Xdh	xanthine dehydrogenase	chr6:34996982-35059195	18.0289	49.3807	18.941	1.45364	0.0712038	1.38243	0.000653095	0.862022	0.000653095	28.4604	16.03	13.7119	11.3377	20.6044	22.5393	81.6432	28.7113	86.9185	27.0911	20.292	20.3884	22.641	12.4426
Mapkapk2	mitogen-activated protein kinase-activated protein kinase 2	chr13:52865896-52912481	61.4434	49.3744	75.5186	-0.315495	0.297574	-0.613069	0.209647	0.288751	0.00677966	57.7866	62.4551	69.6467	58.5667	58.7619	44.2281	56.438	46.7777	46.7751	52.653	65.9489	69.4335	87.2605	79.4314
Gng10	guanine nucleotide binding protein (G protein), gamma 10	chr5:80325897-80332791	72.5208	49.3126	55.4491	-0.556438	-0.387231	-0.169208	0.00715047	0.126683	0.612623	76.9439	66.8314	86.3222	63.2808	69.2255	61.894	39.5697	53.9076	38.2955	52.896	60.1835	57.8366	48.8002	54.976
Mbd6	methyl-CpG binding domain protein 6	chr7:70745584-70751297	54.1312	49.3071	39.445	-0.134665	-0.456617	0.321952	0.693691	0.0666457	0.24324	51.0866	51.259	51.4066	76.8296	40.0743	58.2162	54.6	43.3865	39.0365	51.2963	38.1395	43.9101	34.7169	41.0136
Lrpap1	low density lipoprotein receptor-related protein associated protein 1	chr14:81599968-81611978	38.4477	49.3056	42.3752	0.358854	0.140323	0.218531	0.133728	0.693483	0.484088	33.7636	40.9701	40.0495	40.2245	37.2308	50.6005	40.6081	60.0897	40.5111	54.7186	39.8282	37.4245	42.9705	49.2776
Ppp2r1a	protein phosphatase 2, regulatory subunit A, alpha	chr1:61883997-61903241	58.3957	49.2994	55.6912	-0.244292	-0.0684122	-0.17588	0.376817	0.866865	0.59005	65.5167	53.3253	60.2068	67.6942	45.2355	56.334	56.9554	47.6577	37.8981	47.6519	59.5138	58.3914	55.3721	49.4876
Sec31a	SEC31 homolog A (S. cerevisiae)	chr14:10801888-10856886	52.9263	49.2328	47.4924	-0.104365	-0.156289	0.0519242	0.773626	0.657432	0.904679	59.732	51.0462	54.4693	54.6279	44.7563	48.115	51.197	51.7199	39.8684	55.2638	45.3287	47.531	47.9691	49.1408
LOC691807	hypothetical protein LOC691807	chr2:246456866-246458627	42.9536	49.2227	41.3876	0.196544	-0.0535828	0.250127	0.514745	0.902144	0.41817	48.4812	42.2933	39.956	38.3401	45.6976	59.06	47.1323	41.7186	46.1935	52.0092	40.6358	36.4923	38.6141	49.8081
Phldb1	pleckstrin homology-like domain, family B, member 1	chr8:47602120-47656917	67.3385	49.1856	54.6792	-0.453196	-0.30044	-0.152756	0.0636129	0.329462	0.677123	58.1199	69.9035	55.2107	80.7819	72.6766	51.7275	40.3766	50.7326	43.1783	59.913	52.8603	44.4714	48.7764	72.6087
Tmem14c	transmembrane protein 14C	chr17:23554044-23560166	75.003	49.1582	95.4687	-0.609517	0.348078	-0.957595	0.00715047	0.190594	0.000653095	69.4328	70.107	58.9563	84.7644	91.7547	52.2364	41.5124	48.5633	55.4091	48.0698	114.66	100.523	106.238	60.4533
Wnk1	WNK lysine deficient protein kinase 1	chr4:219537466-219662981	43.0539	49.146	46.6743	0.190931	0.116484	0.0744474	0.558763	0.769453	0.864273	41.7608	44.1463	43.2641	42.0589	44.0394	44.8953	51.3259	50.6968	47.0203	51.7917	50.3728	41.4408	41.8971	52.9864
Rpl10	ribosomal protein L10	chr1:152178405-152180608	63.1849	49.1054	56.9095	-0.363696	-0.150909	-0.212787	0.162638	0.681424	0.516114	70.654	67.0137	70.3707	53.5849	54.301	47.016	60.8951	45.76	37.7454	54.1106	62.9878	54.6532	50.8995	59.0975
Copg1	coatomer protein complex, subunit gamma 1	chr4:185062827-185087265	49.8445	49.0947	51.9266	-0.021868	0.0590397	-0.0809077	0.959647	0.886272	0.838869	52.6475	45.57	49.9112	54.253	46.8408	46.686	44.5187	62.4958	36.6982	55.0746	49.0584	49.8485	51.1864	57.613
Tax1bp3	Tax1 (human T-cell leukemia virus type I) binding protein 3	chr10:59482736-59487236	50.2752	49.0947	55.2354	-0.0342797	0.135746	-0.170026	0.936178	0.709575	0.614644	47.4397	50.7653	66.8076	48.5585	37.8051	66.2717	49.5214	44.3406	33.4464	51.8936	52.2649	66.1213	45.6992	56.8563
Sh3glb1	SH3-domain GRB2-like endophilin B1	chr2:269242688-269271017	37.3861	49.0385	51.9073	0.391413	0.473436	-0.0820231	0.09495	0.0483178	0.837389	36.3221	32.7483	45.577	28.6629	43.6199	43.7647	38.6307	44.8905	70.839	47.0673	52.847	54.6614	62.97	37.1507
Stom	stomatin	chr3:19833116-19855740	39.436	49.0201	47.7111	0.313859	0.274812	0.0390468	0.2253	0.340434	0.927206	46.8032	34.2613	53.0519	31.9935	31.0702	44.0968	58.4541	41.3126	61.321	39.9157	41.5035	52.0892	53.4872	43.7646
Actr1a	ARP1 actin-related protein 1 homolog A, centractin alpha (yeast)	chr1:273554810-273573479	50.5521	49.0112	49.8088	-0.0446604	-0.0213726	-0.0232877	0.912551	0.962334	0.957934	49.4267	49.9085	45.7888	57.2053	50.4314	55.9594	52.0253	47.4781	38.6996	50.8936	46.9478	53.7232	49.6307	48.9332
Gpc3	glypican 3	chrX:139625382-139993328	106.965	48.9034	79.0065	-1.12913	-0.437092	-0.692038	0.000653095	0.11078	0.00441716	141.212	97.1046	120.576	49.101	126.831	34.217	47.777	68.0516	67.3233	27.1481	93.9892	23.5202	83.6356	114.881
Pkd1	polycystic kidney disease 1	chr10:13732198-13813550	44.1069	48.8292	36.0797	0.146741	-0.289819	0.43656	0.73919	0.439046	0.179077	46.9847	43.1642	38.4613	61.6694	30.2548	56.1548	62.2663	42.2305	31.5508	51.9438	32.5625	39.007	34.3141	38.435
Pcmtd1	protein-L-isoaspartate (D-aspartate) O-methyltransferase domain containing 1	chr5:16912202-16951282	52.7992	48.8211	45.9622	-0.113011	-0.20007	0.0870587	0.746411	0.530844	0.823727	48.474	60.6796	53.605	45.4855	55.752	46.8779	47.2977	45.3609	58.5373	46.0318	50.7004	39.1236	45.1333	48.8914
Scyl1	SCY1-like 1 (S. cerevisiae)	chr1:228032960-228062567	50.1476	48.6168	45.5014	-0.0447275	-0.140272	0.0955447	0.975421	0.924708	0.947047	43.6405	45.4428	47.973	64.8348	48.8471	58.3445	42.918	48.9374	41.0133	51.8708	48.5429	50.874	41.944	40.6444
Scp2	sterol carrier protein 2	chr5:131495400-131584281	66.571	48.6136	77.1748	-0.453535	0.213237	-0.666771	0.0452815	0.496633	0.00221111	62.562	59.7165	67.5145	58.2367	84.8252	48.4637	37.45	49.2939	67.686	40.1742	87.7364	72.9414	83.9719	64.0496
RGD1309730	similar to RIKEN cDNA B230118H07	chr3:97747218-97859615	32.2117	48.6075	35.7559	0.593594	0.150595	0.442999	0.0123316	0.692544	0.0942235	29.7937	30.0619	30.2347	31.3047	39.6635	51.3686	69.5508	38.2351	38.3698	45.513	39.7974	34.1563	35.814	33.2557
Gstz1	glutathione S-transferase zeta 1	chr6:120423137-120471409	39.6184	48.5322	50.2207	0.292774	0.342113	-0.0493388	0.422353	0.27127	0.924299	31.812	39.3774	38.2208	26.9299	61.7516	34.4947	23.7292	37.376	122.213	24.8486	61.3755	48.3956	55.3147	35.797
Mrpl13	mitochondrial ribosomal protein L13	chr7:95910452-96009703	59.1729	48.5305	65.4944	-0.286046	0.146435	-0.432481	0.319032	0.691093	0.114092	56.7026	60.5031	50.7482	63.8918	64.019	53.1697	43.815	52.0484	50.9793	42.6401	69.5999	72.8521	68.3584	51.1674
Kdelc2	KDEL (Lys-Asp-Glu-Leu) containing 2	chr8:56547249-56564867	58.6045	48.5221	51.3232	-0.272368	-0.191401	-0.0809671	0.309105	0.560736	0.841469	66.0135	57.254	63.9546	50.0608	55.7396	50.7545	40.0916	61.4048	43.4082	46.9515	59.6393	45.3893	38.6421	61.6221
LOC689064	beta-globin	chr1:175098754-175100120	15.0294	48.5111	7.12016	1.69052	-1.07781	2.76833	0.000653095	0.0180884	0.000653095	7.62497	0.511674	50.9714	0.720442	15.3187	110.315	18.5004	19.2233	82.7051	11.8113	12.2695	0.78607	10.8968	4.52828
Slc16a3	solute carrier family 16 (monocarboxylate transporter), member 3	chr10:109727314-109735890	15.6977	48.4544	21.8019	1.62607	0.473895	1.15217	0.000653095	0.0818	0.000653095	19.1513	10.793	12.4624	19.5683	16.5137	67.3897	38.1837	53.8488	22.9342	59.9155	17.1947	32.9348	14.4604	22.6176
Eif4ebp1	eukaryotic translation initiation factor 4E binding protein 1	chr16:68580262-68593651	40.1553	48.4452	46.954	0.270764	0.225656	0.0451074	0.353257	0.500305	0.919606	54.3108	34.4237	39.142	37.5243	35.3758	48.1418	52.577	41.3323	59.6684	40.5067	42.1601	51.7469	52.2598	41.6492
Pbdc1	polysaccharide biosynthesis domain containing 1	chrX:76840413-76845113	46.8002	48.4072	46.3156	0.0487052	-0.0150174	0.0637226	0.902371	0.974638	0.879202	54.2076	47.0966	35.3529	51.9674	45.3766	67.5725	42.4472	46.1406	40.844	45.0315	51.1659	47.5464	33.8118	52.7382
Wsb2	WD repeat and SOCS box-containing 2	chr12:46762960-46783174	38.6746	48.404	46.6645	0.32374	0.270942	0.0527988	0.203427	0.343056	0.901029	41.9656	39.0914	36.1363	44.2658	31.9137	49.6819	54.4851	51.8038	28.5787	57.4704	40.4213	43.8496	47.4736	54.9136
Ap3d1	adaptor-related protein complex 3, delta 1 subunit	chr7:12006415-12041244	45.98	48.3301	45.3997	0.071916	-0.0183233	0.0902393	0.854065	0.969046	0.818187	41.9515	43.8245	42.3929	51.344	50.3871	47.5008	46.5792	47.7234	48.5043	51.3427	43.642	38.7606	50.2693	48.9269
Ppp1cc	protein phosphatase 1, catalytic subunit, gamma isozyme	chr12:41744530-41762059	58.1358	48.3188	52.8007	-0.266841	-0.138869	-0.127973	0.311237	0.692068	0.720984	60.3053	60.1237	58.3981	56.4366	55.4151	45.8841	49.7156	50.7737	46.7485	48.4721	49.0057	57.3239	57.1984	47.6748
Bicd2	bicaudal D homolog 2 (Drosophila)	chr17:17731017-17775611	70.2443	48.3179	66.8464	-0.539824	-0.0715316	-0.468293	0.0171895	0.869388	0.0724192	63.1026	78.5359	70.8625	74.9678	63.7528	46.3203	52.4175	52.8366	40.7746	49.2404	73.4326	57.7537	60.3762	75.8232
C1qtnf2	C1q and tumor necrosis factor related protein 2	chr10:28909017-28925541	60.5558	48.3029	43.2953	-0.326155	-0.484054	0.157899	0.209647	0.0465043	0.659344	65.2386	61.5473	62.3574	70.3427	43.293	74.2286	19.6197	64.4991	30.5471	52.62	46.9309	43.9139	41.6395	40.6971
Gnl2	guanine nucleotide binding protein-like 2 (nucleolar)	chr5:146796614-146830787	56.9509	48.2959	50.5837	-0.237818	-0.171046	-0.0667725	0.401599	0.603039	0.870565	47.7366	57.4302	54.6449	68.2157	56.7271	57.0869	47.6241	40.1926	50.6172	45.9587	58.7401	47.0412	43.044	53.5094
Axl	Axl receptor tyrosine kinase	chr1:83812117-83840542	62.2281	48.2219	47.4764	-0.367878	-0.390357	0.0224798	0.130406	0.132479	0.961788	76.2841	71.1737	59.1751	53.2766	51.231	47.8105	52.4131	50.4116	35.4086	55.0658	39.0213	42.2762	44.724	63.8839
Zbtb7a	zinc finger and BTB domain containing 7a	chr7:11599410-11612150	46.7381	48.057	39.6424	0.0401488	-0.237554	0.277703	0.918222	0.428153	0.332829	45.6905	46.5955	41.9861	56.754	42.6643	54.5971	51.9049	39.0186	48.6881	46.0765	31.7696	36.3954	39.5862	50.8184
Mat2b	methionine adenosyltransferase II, beta	chr10:25686295-25699413	42.7607	48.0531	46.6692	0.168343	0.126183	0.0421598	0.578304	0.719464	0.91861	52.3108	40.5637	37.7823	45.2974	37.8496	52.0365	60.2822	41.6021	47.3297	39.015	43.603	54.2586	41.5103	47.3047
Prkag1	protein kinase, AMP-activated, gamma 1 non-catalytic subunit	chrX:114999622-115017043	50.4071	48.0328	44.3541	-0.0696073	-0.18456	0.114953	0.854272	0.559781	0.757728	51.6685	48.83	40.2959	59.5675	51.6737	58.6051	52.5879	44.563	35.562	48.8461	47.1679	46.4675	40.5418	43.2392
Prelid1	PRELI domain containing 1	chr17:11943924-11949132	46.6569	48.0053	41.0458	0.0411025	-0.184855	0.225958	0.948652	0.75004	0.674062	50.0568	47.6899	44.9095	52.5857	38.0426	58.2357	44.5173	49.4691	37.6983	50.1061	41.6781	49.4316	37.8421	35.2316
Rtn3	reticulon 3	chr1:229659746-229721487	44.7514	47.9718	52.3012	0.100256	0.224913	-0.124658	0.854934	0.657432	0.831131	47.4512	41.178	46.9473	44.393	43.7873	48.3134	53.7355	46.7548	44.4007	46.6547	42.8531	52.1711	61.4048	52.776
Brk1	BRICK1, SCAR/WAVE actin-nucleating complex subunit	chr4:208855603-208870836	42.8383	47.9262	40.2717	0.161911	-0.0891364	0.251048	0.614556	0.82253	0.414522	43.9742	42.3399	43.985	42.0106	41.882	57.2686	44.7664	50.4131	35.4357	51.747	39.8614	45.4009	38.1024	37.722
Mrp63	mitochondrial ribosomal protein 63	chr15:41919557-41938640	32.7871	47.8092	41.6522	0.544161	0.345264	0.198897	0.0324166	0.276735	0.577707	37.7853	32.4917	22.372	31.1621	40.1244	47.4511	49.2535	42.7537	46.4457	53.1421	37.827	41.9584	53.4843	33.339
Ostc	oligosaccharyltransferase complex subunit (non-catalytic)	chr2:254367953-254383277	33.7894	47.8007	36.9957	0.500461	0.130789	0.369671	0.0311769	0.739086	0.177102	37.9834	32.2399	31.5674	29.0018	38.1545	54.2158	39.3186	51.7141	37.0964	56.6584	38.6542	44.9431	31.5511	32.8345
Tmed3	transmembrane emp24 protein transport domain containing 3	chr8:96576974-96584888	38.3341	47.7969	36.3068	0.31829	-0.0783857	0.396676	0.218562	0.849504	0.13704	40.0981	31.6259	45.5314	40.4815	33.9335	57.5504	36.8167	55.5078	31.9598	57.1499	35.0456	37.5437	33.26	39.3781
Klf2	Kruppel-like factor 2	chr16:19084195-19086146	46.0689	47.7796	34.4052	0.0526024	-0.421166	0.473769	0.898013	0.132948	0.0826826	59.4868	38.2534	52.718	50.521	29.3652	64.2803	33.6971	45.8009	34.2735	60.8463	27.7319	58.3121	36.9554	14.6213
Pet100	PET100 homolog (S. cerevisiae)	chr12:4332961-4336463	55.6473	47.7677	60.8482	-0.220278	0.128902	-0.34918	0.433788	0.719534	0.195249	53.0248	45.2175	42.6149	65.8622	71.5171	56.9409	39.5976	46.3752	44.6017	51.323	62.938	59.4856	78.9149	42.0542
Rcn2	reticulocalbin 2, EF-hand calcium binding domain	chr8:59280448-59297536	41.315	47.7621	40.4139	0.209202	-0.0318125	0.241014	0.454462	0.942285	0.413865	51.4836	40.2503	44.0617	33.9162	36.863	51.5325	45.7545	51.2493	40.5826	49.6916	40.8054	37.9608	40.4505	42.439
Rbp7	retinol binding protein 7, cellular	chr5:169925570-169930189	48.9705	47.7423	77.2853	-0.0366446	0.658281	-0.694925	0.939789	0.00525255	0.00752383	49.7742	57.7248	30.533	56.8221	49.9985	43.695	11.8737	40.5163	96.3319	46.2948	67.9847	120.073	95.8962	25.1878
Dctn6	dynactin 6	chr16:61461252-61480355	40.8397	47.727	43.987	0.224834	0.107105	0.117729	0.448384	0.78532	0.758523	43.0159	42.7015	40.1582	33.2505	45.0722	50.4134	48.457	46.5886	40.9033	52.2725	33.7437	40.2553	52.0523	49.8966
Clasrp	CLK4-associating serine/arginine rich protein	chr1:81757540-81781715	55.7415	47.703	42.4453	-0.22467	-0.393147	0.168477	0.42205	0.118703	0.604113	46.8647	59.9327	54.347	70.1496	47.4133	45.8434	51.0897	43.7359	46.6066	51.2396	47.6117	38.9452	40.7995	42.4246
Adam15	ADAM metallopeptidase domain 15	chr2:208071873-208082511	41.9147	47.6871	39.7941	0.186143	-0.0749009	0.261044	0.537926	0.848344	0.37408	35.6142	42.0208	48.9849	48.4656	34.4878	60.1055	51.5198	46.4185	34.7199	45.6716	43.1456	48.0732	31.6455	36.3121
Ctdnep1	CTD nuclear envelope phosphatase 1	chr10:56336410-56345353	60.2605	47.6807	53.0111	-0.337806	-0.184918	-0.152889	0.174027	0.558763	0.657084	68.2144	53.0577	65.3705	66.5028	48.1569	60.4623	40.0335	44.5137	38.604	54.79	57.1278	56.2586	48.414	50.2439
Txn2	thioredoxin 2	chr7:119139111-119152935	65.0963	47.6066	80.8629	-0.451416	0.312902	-0.764318	0.0481245	0.254861	0.000653095	57.7075	52.333	68.4348	68.0789	78.9275	54.9878	33.0544	45.1162	56.9711	47.9033	78.0903	71.6588	111.495	62.2079
Ppp3r1	protein phosphatase 3, regulatory subunit B, alpha	chr14:100178701-100216673	39.5362	47.5334	45.8869	0.265768	0.214908	0.0508596	0.316059	0.480013	0.903905	47.2316	35.6718	41.0021	34.6498	39.1254	42.5911	47.2294	45.1199	59.0065	43.7198	48.7242	44.5697	48.437	41.8165
Bpgm	2,3-bisphosphoglycerate mutase	chr4:61650880-61679069	26.9174	47.5121	24.4867	0.819756	-0.13654	0.956296	0.000653095	0.732533	0.000653095	23.0044	15.4983	52.3766	17.6252	26.0824	83.3483	27.4537	37.117	54.4771	35.1642	31.2078	21.0623	23.8217	21.8549
Hnrnpm	heterogeneous nuclear ribonucleoprotein M	chr7:18693853-18731848	54.222	47.5084	61.2069	-0.190698	0.174814	-0.365512	0.518651	0.596341	0.162502	51.2388	49.2104	47.7587	53.2105	69.6918	36.0776	46.4497	50.8457	61.7828	42.386	67.7202	54.7206	59.356	63.0306
Idh3a	isocitrate dehydrogenase 3 (NAD+) alpha	chr8:57745462-57764761	82.3609	47.5065	155.614	-0.793834	0.917944	-1.71178	0.000653095	0.000653095	0.000653095	82.5041	51.8003	75.7971	71.4693	130.234	39.9554	26.8905	49.7121	80.3599	40.6148	156.982	143.763	238.781	82.9319
Ppp1r36	protein phosphatase 1, regulatory subunit 36	chr6:108825980-108936519	50.0515	47.4204	49.7708	-0.0779058	-0.0081134	-0.0697924	0.910122	0.992157	0.919606	58.3185	47.805	41.0012	57.4296	45.7035	51.9031	54.3684	41.8793	40.0186	48.9327	43.3815	51.5438	47.0463	57.1118
Ano6	anoctamin 6	chr7:136781651-136973259	52.4868	47.377	53.6429	-0.14777	0.0314318	-0.179202	0.664082	0.945262	0.612491	51.2988	52.5642	56.0826	51.6863	50.8024	42.474	63.7222	44.3641	38.2904	48.0341	49.7979	39.7145	54.827	70.2323
Mal	mal, T-cell differentiation protein	chr3:127099277-127123286	15.5694	47.3294	29.8497	1.60403	0.939005	0.665021	0.000653095	0.000653095	0.00441716	21.3291	16.2637	15.631	13.1963	11.4268	74.4496	29.9002	43.87	32.2192	56.2078	33.8762	42.1364	13.589	29.7971
Rheb	Ras homolog enriched in brain	chr4:6843896-6889004	56.8522	47.3129	64.6946	-0.264984	0.186429	-0.451412	0.328333	0.559524	0.0716864	66.9304	63.3261	60.1007	52.762	41.142	40.1636	54.0154	52.1418	44.0502	46.1935	75.2287	64.7086	57.5096	61.3316
RGD1311899	similar to RIKEN cDNA 2210016L21 gene	chr12:49226758-49232335	52.5428	47.3115	47.0113	-0.151303	-0.160487	0.00918422	0.636985	0.631468	0.982833	46.6116	55.4688	56.5603	54.4526	49.6208	56.1901	47.9417	41.7431	40.4253	50.2572	51.1371	39.3823	48.6317	48.8939
Cdv3	carnitine deficiency-associated gene expressed in ventricle 3 homolog (mouse)	chr8:111231868-111242236	43.0586	47.3074	57.257	0.135765	0.41115	-0.275386	0.68891	0.10507	0.336832	43.1698	49.0094	37.9505	40.3139	44.8494	48.3583	39.6371	41.9935	63.3243	43.2239	48.2453	54.6856	60.2224	65.8748
Fam129a	family with sequence similarity 129, member A	chr13:73927636-74076143	103.912	47.3071	95.7326	-1.13524	-0.118287	-1.01695	0.000653095	0.775903	0.000653095	109.279	114.725	95.1112	106.556	93.8911	44.0343	57.2099	42.0975	46.1784	47.0156	82.9849	52.8348	98.5797	148.531
Chpt1	choline phosphotransferase 1	chr7:29136814-29177859	40.062	47.2751	71.7576	0.238846	0.840896	-0.60205	0.435481	0.000653095	0.0180884	38.1424	37.3569	39.1065	27.8803	57.8241	29.1813	28.2054	44.5243	96.5925	37.8723	80.7676	58.6448	92.9042	54.7138
Ccng1	cyclin G1	chr10:25754108-25760482	31.6824	47.1826	36.5611	0.574573	0.206626	0.367947	0.00601445	0.498222	0.161645	37.6021	32.4111	33.9152	26.7469	27.7367	49.6797	63.2216	43.1231	35.1008	44.788	33.2244	43.9256	34.06	35.0344
Rnps1	ribonucleic acid binding protein S1	chr10:13603388-13613705	48.3993	47.168	49.1025	-0.0371755	0.0208122	-0.0579877	0.924299	0.962334	0.886407	43.886	48.2421	49.465	49.7958	50.6074	46.2672	46.1118	44.6119	49.5318	49.3175	44.4608	46.1558	55.6547	50.1388
Agt	angiotensinogen (serpin peptidase inhibitor, clade A, member 8)	chr19:68026226-68038550	24.4858	47.123	61.6789	0.944485	1.33283	-0.388347	0.000653095	0.000653095	0.161645	34.5225	15.0581	19.8517	12.5388	40.4578	32.8216	50.3888	39.7089	86.3938	26.3017	73.5752	49.998	92.846	30.2965
Pebp1	phosphatidylethanolamine binding protein 1	chr12:46846900-46851101	64.5916	47.0763	66.2997	-0.456344	0.0376566	-0.494	0.0499771	0.929313	0.0385264	60.2305	60.6963	74.9723	59.9503	67.1085	49.182	35.4843	53.5731	44.2173	52.9251	69.8759	60.3084	74.3123	60.7023
Cops7a	COP9 signalosome subunit 7A	chr4:224497367-224504733	55.9015	47.0437	51.3961	-0.248886	-0.121229	-0.127657	0.354844	0.741066	0.724122	65.155	48.4669	53.9433	64.3947	47.5476	53.8609	40.1458	49.1033	40.2499	51.8586	47.434	50.0304	59.1349	48.9851
Erlec1	endoplasmic reticulum lectin 1	chr14:114972392-115009184	36.5061	47.04	38.5475	0.365751	0.0785003	0.28725	0.123149	0.842817	0.302773	33.7124	44.7827	40.7185	29.645	33.6719	55.6056	45.0973	47.9556	42.1114	44.4301	38.867	46.4646	36.1132	32.7453
Ddit4	DNA-damage-inducible transcript 4	chr20:31315023-31317123	64.8607	46.9493	43.1233	-0.466241	-0.588876	0.122635	0.0537504	0.017493	0.743614	126.655	40.4584	57.0004	62.5858	37.6037	56.5471	42.1702	66.6466	31.6903	37.6923	63.2996	30.6595	46.6511	31.8831
RGD1565685	similar to RIKEN cDNA 1810030O07	chrX:11882873-11904143	38.6259	46.8907	32.2251	0.279731	-0.261387	0.541119	0.299627	0.386332	0.0189735	45.9726	33.8093	35.7346	44.3209	33.2924	61.7451	47.5724	45.9899	37.2832	41.863	34.9448	34.3881	29.7937	29.7736
Pja2	praja ring finger 2, E3 ubiquitin protein ligase	chr9:111539414-111589992	51.1487	46.8721	55.9263	-0.125969	0.128827	-0.254795	0.716497	0.733768	0.40445	48.1909	50.2594	46.7732	53.5012	57.0191	42.5493	51.3286	47.1773	45.9009	47.4046	56.1394	44.4022	54.2556	68.9079
Erp44	endoplasmic reticulum protein 44	chr5:68455220-68548182	32.6719	46.8394	37.4428	0.519673	0.196639	0.323033	0.0237049	0.542442	0.242584	33.8354	29.9607	31.6316	27.8108	40.121	45.2472	43.5602	50.2584	51.301	43.83	36.9859	33.4127	37.2853	42.0873
Ogdh	oxoglutarate (alpha-ketoglutarate) dehydrogenase (lipoamide)	chr14:87307371-87523225	81.8625	46.8338	121.254	-0.805654	0.566758	-1.37241	0.0353991	0.199597	0.000653095	80.2864	63.5576	75.3157	66.0617	124.091	37.1793	35.6021	52.1944	59.9822	49.2109	107.403	94.0749	200.982	82.5558
Cebpd	CCAAT/enhancer binding protein (C/EBP), delta	chr11:92069757-92070896	19.2967	46.8067	18.4807	1.27836	-0.062332	1.34069	0.000653095	0.900133	0.000653095	28.679	9.3476	25.7022	14.7099	18.0447	40.2676	62.1281	48.4886	47.1861	35.9629	18.4592	31.6775	13.0111	10.7752
Ier2	immediate early response 2	chr19:36750510-36752033	38.8567	46.7933	27.405	0.26814	-0.503722	0.771863	0.319254	0.0479524	0.00173202	52.7952	29.6079	40.9645	44.8727	26.043	53.7248	31.0642	52.9997	44.8482	51.3298	19.7215	45.1699	26.2724	18.4563
Pced1a	PC-esterase domain containing 1A	chr3:129442745-129446650	43.6268	46.746	34.3715	0.099626	-0.344004	0.44363	0.784311	0.228701	0.0910193	32.7803	45.8675	42.9581	57.4061	39.1224	62.0378	43.5076	41.0711	35.5536	51.5598	32.2491	40.4521	27.9151	36.8696
Dctn2	dynactin 2 (p50)	chr7:70730173-70745438	51.1671	46.737	53.1124	-0.13065	0.0538317	-0.184481	0.687475	0.894498	0.561807	56.4949	54.4022	49.0955	50.4432	45.3996	39.5348	58.7455	44.3113	46.0408	45.0528	53.6353	52.1262	58.7581	47.9299
Ndufb2	NADH dehydrogenase (ubiquinone) 1 beta subcomplex, 2	chr4:67185339-67192419	74.9675	46.7226	84.5584	-0.682146	0.173682	-0.855829	0.00357487	0.632134	0.000653095	80.118	60.9844	66.159	92.6202	74.956	49.7789	41.5868	55.0619	47.9348	39.2505	82.1547	88.4252	107.012	60.6413
Arf6	ADP-ribosylation factor 6	chr6:101150427-101151576	48.6937	46.7173	41.265	-0.0597763	-0.238815	0.179039	0.878516	0.433928	0.597506	48.4237	47.6939	55.1339	51.4204	40.7964	48.8586	46.1026	41.525	39.3151	57.7854	30.3887	50.2428	41.7029	42.7256
Naa38	N(alpha)-acetyltransferase 38, NatC auxiliary subunit	chr4:43016687-43022554	37.2381	46.7153	38.7716	0.327115	0.0582191	0.268895	0.236692	0.898705	0.401682	45.9397	38.5046	35.527	33.1928	33.0266	48.7997	55.8095	43.0534	46.9478	38.9661	40.0414	52.5138	32.23	30.3011
Ap2s1	adaptor-related protein complex 2, sigma 1 subunit	chr1:79918161-79929502	43.8142	46.7088	39.7321	0.0922949	-0.141094	0.233389	0.80987	0.718188	0.482255	38.1279	38.9402	35.4342	54.2572	52.3118	67.9655	38.7604	44.8709	38.5983	43.349	35.5021	41.1282	41.2722	41.026
Ptpn11	protein tyrosine phosphatase, non-receptor type 11	chr12:42762629-42822760	53.2867	46.6999	58.4104	-0.190356	0.132452	-0.322808	0.539775	0.729163	0.262262	58.2674	50.7738	51.4999	56.8889	49.0033	44.3628	56.0518	47.6059	36.9826	48.4962	63.1175	54.6713	56.3175	59.5353
Gde1	glycerophosphodiester phosphodiesterase 1	chr1:195338346-195350223	36.114	46.6982	56.5873	0.370809	0.64792	-0.277111	0.178297	0.00601445	0.387939	34.6398	30.8828	35.1158	33.6644	46.2671	36.9642	28.7301	32.9222	97.6828	37.1917	51.3602	63.7692	78.053	33.1667
Cd36	CD36 molecule (thrombospondin receptor)	chr4:14014704-14216207	30.4822	46.6284	55.7676	0.613243	0.871461	-0.258218	0.00752383	0.000653095	0.43175	27.2296	24.1159	23.4691	28.8621	48.7342	24.0185	41.7289	34.1015	95.4591	37.8339	54.9364	55.2023	80.4606	32.4709
[truncated: 15,483 more rows]
